# Supplementary material for: Study on the signaling pathways involved in the anti-hyperglycemic effect of raspberry ketone on zebrafish using integrative transcriptome and metabolome analyses
Source: Royal Society of Chemistry journal article supplement (doi:10.1039/d4fo01675k), 2024-01-01
Supplement: d4fo01675k1.xlsx [file d4fo01675k1.xlsx]

## Sheet: NEG_Control_vs_STZ
ID	FC	log2(FC)	raw.pval	#NAME?	VIP	Compound	HMDBID
189.9744__149.82	0.00547	-7.5142	0.050419	1.2974	1.21585	p-Chlorobenzenesulfonamide;	HMDB0061173
675.0903__85.69	0.024311	-5.3622	0.00037832	3.4221	1.7431	({6-[5,7-dihydroxy-4-oxo-8-(3,4,5-trihydroxyoxan-2-yl)-2-(2,4,5-trihydroxyphenyl)-4H-chromen-6-yl]-3,4,5-trihydroxyoxan-2-yl}methoxy)sulfonic acid; (2-{5,7-dihydroxy-4-oxo-6-[3,4,5-trihydroxy-6-(hydroxymethyl)oxan-2-yl]-2-(2,4,5-trihydroxyphenyl)-4H-chromen-8-yl}-4,5-dihydroxyoxan-3-yl)oxidanesulfonic acid; (2-{5,7-dihydroxy-4-oxo-6-[3,4,5-trihydroxy-6-(hydroxymethyl)oxan-2-yl]-2-(2,4,5-trihydrox…	HMDB0126903	HMDB0126904	HMDB0126905	HMDB0126906	HMDB0126907
162.8925__698.47	0.03625	-4.7859	0.065306	1.185	1.08681	Molybdate;	HMDB0012260
812.5462__501.01	0.042983	-4.5401	0.014222	1.847	1.36587	PS(18:0/20:3(8Z,11Z,14Z)); PS(20:3(8Z,11Z,14Z)/18:0); PS(16:1(9Z)/22:2(13Z,16Z)); PS(18:0/20:3(5Z,8Z,11Z)); PS(18:1(11Z)/20:2(11Z,14Z));	HMDB0012382	HMDB0012422	HMDB0112366	HMDB0112377	HMDB0112394
749.5332__631.16	0.044676	-4.4843	0.0030708	2.5127	1.59336	PG(16:0/18:0); PG(18:0/16:0); PG(a-13:0/a-21:0); PG(a-13:0/i-21:0); PG(i-12:0/i-22:0);	HMDB0010572	HMDB0010600	HMDB0116640	HMDB0116651	HMDB0116670
815.5691__328.61	0.052431	-4.2534	0.0051728	2.2863	1.54305	3alpha,7alpha,12beta-Trihydroxy-5beta-cholanoic acid; 3a,4b,7a-Trihydroxy-5b-cholanoic acid; 1b,3a,12a-Trihydroxy-5b-cholanoic acid; 3a,4b,12a-Trihydroxy-5b-cholanoic acid; 3a,6a,7b-Trihydroxy-5b-cholanoic acid;	HMDB0000312	HMDB0000320	HMDB0000326	HMDB0000330	HMDB0000364
385.0506__291.97	0.055664	-4.1671	0.00063181	3.1994	1.70912	Lithol Rubine;	HMDB0041567
746.5147__637.74	0.057492	-4.1205	0.078973	1.1025	1.06979	PE(P-16:0/22:6(4Z,7Z,10Z,13Z,16Z,19Z)); PE(20:5(5Z,8Z,11Z,14Z,17Z)/P-18:1(11Z)); PE(20:5(5Z,8Z,11Z,14Z,17Z)/P-18:1(9Z)); PE(22:6(4Z,7Z,10Z,13Z,16Z,19Z)/P-16:0); PE(P-18:1(11Z)/20:5(5Z,8Z,11Z,14Z,17Z));	HMDB0005780	HMDB0009479	HMDB0009480	HMDB0009708	HMDB0011420
812.5464__649.07	0.063226	-3.9833	0.01157	1.9367	1.38659	PS(18:0/20:3(8Z,11Z,14Z)); PS(20:3(8Z,11Z,14Z)/18:0); PS(16:1(9Z)/22:2(13Z,16Z)); PS(18:0/20:3(5Z,8Z,11Z)); PS(18:1(11Z)/20:2(11Z,14Z));	HMDB0012382	HMDB0012422	HMDB0112366	HMDB0112377	HMDB0112394
496.2422__98.2	0.092123	-3.4403	0.00012485	3.9036	1.75842	N1,N10-Diferuloylspermidine;	HMDB0033471
609.5586__590.57	0.098036	-3.3505	0.00023506	3.6288	1.77922	CE(15:0);	HMDB0060057
393.265__315.56	0.10495	-3.2522	2.8671e-07	6.5426	1.96611	11-Hydroxyeicosatetraenoate glyceryl ester; 2-(14,15-Epoxyeicosatrienoyl) Glycerol;	HMDB0012530	HMDB0013651
451.2709__308.23	0.10565	-3.2426	0.00040588	3.3916	1.74624	LysoPE(0:0/16:1(9Z)); LysoPE(16:1(9Z)/0:0); Cytochalasin Opho;	HMDB0011474	HMDB0011504	HMDB0035366
297.0611__80.5	0.10674	-3.2278	2.0379e-06	5.6908	1.92334	Benzoyl glucuronide (Benzoic acid); 6-(benzoyloxy)-3,4,5-trihydroxyoxane-2-carboxylic acid;	HMDB0010324	HMDB0125176
272.9566__48.47	0.10707	-3.2233	0.0015033	2.823	1.66598	Ribose-1-arsenate;	HMDB0012285
537.0877__167.01	0.12955	-2.9484	5.23e-06	5.2815	1.90643	6-{[3,7-dihydroxy-2-(1-hydroxy-3-methoxy-4-oxocyclohexa-2,5-dien-1-yl)-6-methoxy-4-oxo-4H-chromen-5-yl]oxy}-3,4,5-trihydroxyoxane-2-carboxylic acid; 6-{[3,5-dihydroxy-2-(1-hydroxy-3-methoxy-4-oxocyclohexa-2,5-dien-1-yl)-6-methoxy-4-oxo-4H-chromen-7-yl]oxy}-3,4,5-trihydroxyoxane-2-carboxylic acid; 6-{[5,7-dihydroxy-2-(1-hydroxy-3-methoxy-4-oxocyclohexa-2,5-dien-1-yl)-6-methoxy-4-oxo-4H-chromen-3-y…	HMDB0128780	HMDB0128781	HMDB0128782
766.5412__632.55	0.13049	-2.938	0.080711	1.0931	1.10211	PC(15:0/20:4(5Z,8Z,11Z,14Z)); PC(15:0/20:4(8Z,11Z,14Z,17Z)); PC(20:4(5Z,8Z,11Z,14Z)/15:0); PC(20:4(8Z,11Z,14Z,17Z)/15:0); PE(16:0/22:4(7Z,10Z,13Z,16Z));	HMDB0007949	HMDB0007950	HMDB0008428	HMDB0008461	HMDB0008943
391.1162__167.15	0.15487	-2.6908	0.0089748	2.047	1.44531	cyclic N-Acetylserotonin glucuronide;	HMDB0060812
243.1236__215.05	0.15613	-2.6792	0.00048626	3.3131	1.72672	Polyethylene, oxidized;	HMDB0032472
441.3165__241.55	0.16087	-2.6361	0.028628	1.5432	1.31824	(all-E)-6'-Apo-y-caroten-6'-al;	HMDB0040118
155.1431__223.43	0.16691	-2.5828	0.001146	2.9408	1.67548	Menthol; Decanal; (E)-3-decen-1-ol; 2-Decanone; cis-4-Decenol;	HMDB0003352	HMDB0011623	HMDB0013810	HMDB0031409	HMDB0032206
700.5299__643.1	0.20845	-2.2622	0.080518	1.0941	1.03577	PE(16:0/P-18:1(11Z)); PE(16:0/P-18:1(9Z)); PE(16:1(9Z)/P-18:0); PE(18:1(11Z)/P-16:0); PE(18:1(9Z)/P-16:0);	HMDB0008951	HMDB0008952	HMDB0008983	HMDB0009048	HMDB0009081
722.5117__522.08	0.21355	-2.2273	0.053295	1.2733	1.08463	PE(18:3(6Z,9Z,12Z)/P-18:1(11Z)); PE(18:3(6Z,9Z,12Z)/P-18:1(9Z)); PE(18:3(9Z,12Z,15Z)/P-18:1(11Z)); PE(18:3(9Z,12Z,15Z)/P-18:1(9Z)); PE(18:4(6Z,9Z,12Z,15Z)/P-18:0);	HMDB0009149	HMDB0009150	HMDB0009182	HMDB0009183	HMDB0009214
433.1889__46.57	0.22655	-2.1421	0.00067071	3.1735	1.70164	1,1'-Ethylidenebistryptophan;	HMDB0034899
589.4802__545.19	0.22955	-2.1231	0.01614	1.7921	1.36599	DG(14:0/20:3(5Z,8Z,11Z)/0:0); DG(14:0/20:3(8Z,11Z,14Z)/0:0); DG(14:1(9Z)/20:2(11Z,14Z)/0:0); DG(16:0/18:3(6Z,9Z,12Z)/0:0); DG(16:0/18:3(9Z,12Z,15Z)/0:0);	HMDB0007023	HMDB0007024	HMDB0007051	HMDB0007104	HMDB0007105
275.1502__240.66	0.2305	-2.1172	0.004822	2.3168	1.53774	4-Hydroxycinnamoylagmatine;	HMDB0033460
810.5296__648.09	0.23664	-2.0792	0.067401	1.1713	1.11473	PS(18:0/20:4(8Z,11Z,14Z,17Z)); PS(18:0/20:4(5Z,8Z,11Z,14Z)); PS(18:1(9Z)/20:3(8Z,11Z,14Z)); PS(20:3(8Z,11Z,14Z)/18:1(9Z)); PS(20:4(5Z,8Z,11Z,14Z)/18:0);	HMDB0010165	HMDB0012383	HMDB0012393	HMDB0012423	HMDB0012433
748.5285__633.69	0.24626	-2.0217	0.031123	1.5069	1.32655	PE(20:4(5Z,8Z,11Z,14Z)/P-18:1(11Z)); PE(20:4(5Z,8Z,11Z,14Z)/P-18:1(9Z)); PE(20:4(8Z,11Z,14Z,17Z)/P-18:1(11Z)); PE(20:4(8Z,11Z,14Z,17Z)/P-18:1(9Z)); PE(20:5(5Z,8Z,11Z,14Z,17Z)/P-18:0);	HMDB0009413	HMDB0009414	HMDB0009446	HMDB0009447	HMDB0009478
144.0444__175.43	0.24833	-2.0097	0.07725	1.1121	1.04525	Indole-3-carboxaldehyde;	HMDB0029737
405.2651__307.38	0.24945	-2.0032	0.00028582	3.5439	1.76002	7-Ketodeoxycholic acid; 3,7-Dihydroxy-12-oxocholanoic acid; 3-Oxocholic acid; Annocherin A; (6b,7b,13R)-6,7-Diacetoxy-8,14-labdadiene-13-ol;	HMDB0000391	HMDB0000400	HMDB0000502	HMDB0033399	HMDB0035288
338.989__22.72	0.26027	-1.9419	0.057634	1.2393	1.18036	D-myo-Inositol 1,4-bisphosphate; D-Fructose 2,6-bisphosphate; Fructose 1,6-bisphosphate; alpha-D-Glucose 1,6-bisphosphate; D-myo-Inositol 1,3-bisphosphate;	HMDB0000968	HMDB0001047	HMDB0001058	HMDB0003514	HMDB0006234
804.577__482.36	0.26384	-1.9223	0.06916	1.1601	1.14501	PS(15:0/22:0); PS(22:0/15:0);	HMDB0112334	HMDB0112709
453.2863__329.11	0.27171	-1.8799	0.00029511	3.53	1.75559	LysoPE(0:0/16:0); LysoPE(16:0/0:0); Sambutoxin; 3alpha,7alpha,12beta-Trihydroxy-5beta-cholanoic acid; 3a,4b,7a-Trihydroxy-5b-cholanoic acid; 1b,3a,12a-Trihydroxy-5b-cholanoic acid; 3a,4b,12a-Trihydroxy-5b-cholanoic acid; 3a,6a,7b-Trihydroxy-5b-cholanoic acid;	HMDB0011473	HMDB0011503	HMDB0041085	HMDB0000312	HMDB0000320	HMDB0000326	HMDB0000330	HMDB0000364
459.2732__384.51	0.27301	-1.873	0.00029174	3.535	1.75791	2,3-Secoporrigenin; Lucidenic acid N;	HMDB0030909	HMDB0038352
430.1044__118.8	0.28274	-1.8225	0.019388	1.7125	1.41127	Ochratoxin C;	HMDB0029400
916.6037__586.16	0.28891	-1.7913	0.054313	1.2651	1.11484	PS(22:6(4Z,7Z,10Z,13Z,16Z,19Z)/24:1(15Z)); PS(24:1(15Z)/22:6(4Z,7Z,10Z,13Z,16Z,19Z));	HMDB0112880	HMDB0116796
315.0879__160.06	0.2944	-1.7642	0.026409	1.5783	1.31408	Homoferreirin; 3-(3,4-Dihydroxybenzyl)-7-hydroxy-5-methoxy-4-chromanone; Melilotocarpan E; Melilotocarpan D; Olivin;	HMDB0030111	HMDB0033298	HMDB0033683	HMDB0033692	HMDB0033797
381.1744__630.85	0.29736	-1.7497	0.0092916	2.0319	1.49838	1,2,10-Trihydroxydihydro-trans-linalyl oxide 7-O-beta-D-glucopyranoside;	HMDB0033237
220.0612__238.6	0.29753	-1.7489	0.086534	1.0628	#N/A	Methyl 5-hydroxyoxindole-3-acetate; Methyl dioxindole-3-acetate;	HMDB0038990	HMDB0038991
549.269__197.46	0.29897	-1.7419	0.0023178	2.6349	1.59171	Desglucocheirotoxin;	HMDB0034362
171.0767__198.97	0.30773	-1.7003	0.016747	1.7761	1.34055	Glycylproline; Prolylglycine;	HMDB0000721	HMDB0011178
475.2681__328.77	0.30876	-1.6955	0.00018076	3.7429	1.79062	LysoPE(0:0/18:3(6Z,9Z,12Z)); LysoPE(0:0/18:3(9Z,12Z,15Z)); LysoPE(18:3(6Z,9Z,12Z)/0:0); LysoPE(18:3(9Z,12Z,15Z)/0:0);	HMDB0011478	HMDB0011479	HMDB0011508	HMDB0011509
585.1991__630.81	0.31058	-1.687	0.0066084	2.1799	1.52875	Physalin E acetate;	HMDB0031878
521.9839__32.74	0.31693	-1.6577	0.018325	1.7369	1.35242	Guanosine triphosphate; 8-Oxo-dGTP;	HMDB0001273	HMDB0011615
473.1989__270.57	0.31765	-1.6545	0.02191	1.6594	1.31774	Sildenafil;	HMDB0005039
115.05__128.41	0.31983	-1.6446	0.047271	1.3254	1.2179	N,N'-Diacetylhydrazine; N-Nitroso-3-hydroxypyrrolidine;	HMDB0060496	HMDB0061163
216.1237__151.47	0.32917	-1.6031	0.0077996	2.1079	1.50535	Propionylcarnitine;	HMDB0000824
236.0784__247.73	0.33252	-1.5885	0.0095891	2.0182	1.46417	Sepiapterin; Biopterin; D-Biopterin; Orinapterin; Dyspropterin;	HMDB0000238	HMDB0000468	HMDB0000633	HMDB0000817	HMDB0001195
748.5295__522.03	0.33419	-1.5813	0.040883	1.3885	1.24318	PE(20:4(5Z,8Z,11Z,14Z)/P-18:1(11Z)); PE(20:4(5Z,8Z,11Z,14Z)/P-18:1(9Z)); PE(20:4(8Z,11Z,14Z,17Z)/P-18:1(11Z)); PE(20:4(8Z,11Z,14Z,17Z)/P-18:1(9Z)); PE(20:5(5Z,8Z,11Z,14Z,17Z)/P-18:0);	HMDB0009413	HMDB0009414	HMDB0009446	HMDB0009447	HMDB0009478
162.0413__105.55	0.3351	-1.5773	0.00086967	3.0606	1.69234	Pterin; Thialdine;	HMDB0000802	HMDB0031187
299.0636__137.91	0.33952	-1.5584	0.051778	1.2859	1.1551	beta-D-3-Ribofuranosyluric acid;	HMDB0029920
367.1055__32.97	0.34312	-1.5432	0.064023	1.1937	1.09894	3-Feruloylquinic acid; 3-O-Caffeoyl-1-O-methylquinic acid; 3-O-Caffeoyl-4-O-methylquinic acid; 3,4,5-trihydroxy-6-[(5-hydroxy-2,2-dimethyl-2H-chromen-7-yl)oxy]oxane-2-carboxylic acid; 3,4,5-trihydroxy-6-[(7-hydroxy-2,2-dimethyl-2H-chromen-5-yl)oxy]oxane-2-carboxylic acid;	HMDB0030669	HMDB0039959	HMDB0039960	HMDB0126418	HMDB0126419
248.131__220.65	0.34315	-1.5431	0.093009	1.0315	1.05342	2-Pentanamido-3-phenylpropanoic acid;	HMDB0094646
199.1698__124.31	0.34629	-1.53	0.01864	1.7296	1.33918	Dodecanoic acid; Ethyl decanoate; 2-Heptyl butyrate; Nonanal propyleneglycol acetal; Hexyl hexanoate;	HMDB0000638	HMDB0030998	HMDB0032310	HMDB0032440	HMDB0033619
248.9734__37.95	0.34841	-1.5211	0.00016572	3.7806	1.76005	4-Chloro-5-sulfamoylanthranilic acid;	HMDB0060761
244.1378__296.8	0.35943	-1.4762	0.00010813	3.9661	1.81177	S-3-oxodecanoyl cysteamine;	HMDB0059773
804.5779__563.4	0.35979	-1.4748	0.023704	1.6252	1.34988	PS(15:0/24:0); PS(24:0/15:0);	HMDB0112340	HMDB0112883
355.1586__630.25	0.37141	-1.4289	0.0057419	2.2409	1.49959	Bortezomib;	HMDB0014334
271.0651__193.75	0.38214	-1.3878	0.0074729	2.1265	1.43953	[4-(4-methyl-3-oxopentyl)phenyl]oxidanesulfonic acid; {[(1E)-1-(4-methoxyphenyl)pent-1-en-3-yl]oxy}sulfonic acid;	HMDB0132963	HMDB0132998
407.2805__328.5	0.38403	-1.3807	0.078086	1.1074	1.07117	3alpha,7alpha,12beta-Trihydroxy-5beta-cholanoic acid; 3a,4b,7a-Trihydroxy-5b-cholanoic acid; 1b,3a,12a-Trihydroxy-5b-cholanoic acid; 3a,4b,12a-Trihydroxy-5b-cholanoic acid; 3a,6a,7b-Trihydroxy-5b-cholanoic acid;	HMDB0000312	HMDB0000320	HMDB0000326	HMDB0000330	HMDB0000364
468.1298__41.55	0.38628	-1.3723	0.0010409	2.9826	1.67585	O-Methyl-4-[(2',3',4'-tri-O-acetyl-alpha-L-rhamnosyloxy)benzyl]thiocarbamate; 3-(3,4-dimethoxyphenyl)-N-[2-(3,4-dimethoxyphenyl)ethyl]-3-(sulfooxy)propanimidic acid; 3-(3,4-dimethoxyphenyl)-N-[2-(3,4-dimethoxyphenyl)-2-(sulfooxy)ethyl]propanimidic acid; 3-(3,4-dimethoxyphenyl)-N-[2-(3,4-dimethoxyphenyl)ethyl]-2-(sulfooxy)propanimidic acid;	HMDB0031943	HMDB0135504	HMDB0135506	HMDB0135508
187.0412__660.92	0.38754	-1.3676	0.011083	1.9553	1.46023	Isoplumbagin;	HMDB0035291
532.1979__234.85	0.39097	-1.3549	9.222e-05	4.0352	1.82274	3,4,5-trihydroxy-6-{[4-hydroxy-7-methoxy-2,2-dimethyl-6-(3-phenylpropanoyl)-3,4-dihydro-2H-1-benzopyran-5-yl]oxy}oxane-2-carboxylic acid;	HMDB0125834
196.061__293.83	0.39469	-1.3412	4.9679e-05	4.3038	1.84546	L-Dopa; DL-Dopa; 2-Hydroxy-3-(3,4-dihydroxyphenyl)propanamide; N-Hydroxy-L-tyrosine;	HMDB0000181	HMDB0000609	HMDB0038336	HMDB0038750
958.5197__649.68	0.3948	-1.3408	0.072759	1.1381	1.08214	Congmuyenoside A; Asiaticoside; Soyasaponin A3; Mabioside A; Hoduloside I;	HMDB0031376	HMDB0036656	HMDB0038608	HMDB0038886	HMDB0039075
340.2855__478.56	0.39638	-1.3351	0.096122	1.0172	1.0727	Stearoylglycine; N-Palmitoyl GABA;	HMDB0013308	HMDB0062338
326.2703__463.89	0.39871	-1.3266	0.02637	1.5789	1.34355	Margaroylglycine;	HMDB0013246
453.1717__110.55	0.40062	-1.3197	0.00015449	3.8111	1.80054	alpha-CEHC glucuronide;	HMDB0062445
174.0552__225.8	0.40489	-1.3044	0.020415	1.69	1.37227	Indoleacetic acid; 5-Hydroxyindoleacetaldehyde; Hydroxymethyl indol-3-yl ketone; 1-Methoxy-1H-indole-3-carboxaldehyde;	HMDB0000197	HMDB0004073	HMDB0038628	HMDB0040972
220.0973__315.99	0.40653	-1.2986	0.0092165	2.0354	1.42931	Metaxalone; Carbofuran; Hydrocotarnine;	HMDB0014798	HMDB0031770	HMDB0033701
115.0752__157.12	0.42023	-1.2508	0.012343	1.9086	1.43564	Caproic acid; Isocaproic acid; Methyl (S)-2-Methylbutanoate; Methyl 3-methylbutanoate; Isopropyl propionate;	HMDB0000535	HMDB0000689	HMDB0029762	HMDB0030027	HMDB0030056
193.0864__325.45	0.42133	-1.247	1.1706e-07	6.9316	1.98101	4-(Nitrosoamino)-1-(3-pyridinyl)-1-butanone;	HMDB0062376
125.0959__149.24	0.42616	-1.2305	0.053498	1.2717	1.14691	(E)-2-octenal; 2-Octenal; (3xi,5Z)-1,5-Octadien-3-ol; 2,4,4-Trimethylcyclopentanone; 2-Octen-4-one;	HMDB0013809	HMDB0030961	HMDB0030966	HMDB0031197	HMDB0031301
173.0924__123.2	0.42694	-1.2279	0.014793	1.8299	1.36507	N2-Acetylornithine; Glycylvaline; Valylglycine; L-Theanine; Gly-Norvaline;	HMDB0003357	HMDB0028854	HMDB0029127	HMDB0034365	HMDB0094702
347.0402__46.12	0.42799	-1.2243	0.0055925	2.2524	1.54089	Inosinic acid; Inosine 2'-phosphate; 2-(2,5-dihydroxy-4-methoxyphenyl)-3,5,6,7-tetrahydroxy-4H-chromen-4-one; 3,5,7-trihydroxy-6-methoxy-2-(3,4,5-trihydroxyphenyl)-4H-chromen-4-one; 3,5,7-trihydroxy-6-methoxy-2-(2,3,4-trihydroxyphenyl)-4H-chromen-4-one;	HMDB0000175	HMDB0011681	HMDB0129456	HMDB0131883	HMDB0131884
662.1032__108.69	0.43333	-1.2065	0.023663	1.6259	1.33492	NAD; Fenugreekine;	HMDB0000902	HMDB0039421
264.1608__454.22	0.43344	-1.2061	0.0015263	2.8164	1.66724	Oxprenolol; 4-Hydroxy-alprenolol;	HMDB0015520	HMDB0061122
190.0867__343.32	0.43573	-1.1985	0.0077736	2.1094	1.48941	5-Methoxytryptophol; (E)-5-(3,4,5,6-Tetrahydro-3-pyridylidenemethyl)-2-furanmethanol;	HMDB0001896	HMDB0033560
526.2239__280.76	0.43891	-1.188	6.6525e-05	4.177	1.79948	Hygromycin B; 2-amino-4-({1-[(carboxymethyl)-C-hydroxycarbonimidoyl]-2-[(2,3-dihydroxy-2-pentyl-1-phenylpropyl)sulfanyl]ethyl}-C-hydroxycarbonimidoyl)butanoic acid; 2-amino-4-({1-[(carboxymethyl)-C-hydroxycarbonimidoyl]-2-[(1,3-dihydroxy-2-pentyl-1-phenylpropan-2-yl)sulfanyl]ethyl}-C-hydroxycarbonimidoyl)butanoic acid;	HMDB0034229	HMDB0126538	HMDB0126539
805.581__451.5	0.43981	-1.1851	0.0033345	2.477	1.59768	PA(20:4(5Z,8Z,11Z,14Z)/24:1(15Z)); PA(20:4(8Z,11Z,14Z,17Z)/24:1(15Z)); PA(20:5(5Z,8Z,11Z,14Z,17Z)/24:0); PA(22:0/22:5(4Z,7Z,10Z,13Z,16Z)); PA(22:0/22:5(7Z,10Z,13Z,16Z,19Z));	HMDB0115170	HMDB0115197	HMDB0115222	HMDB0115264	HMDB0115265
615.4964__556.08	0.4415	-1.1795	0.021312	1.6714	1.32331	DG(14:0/22:4(7Z,10Z,13Z,16Z)/0:0); DG(16:0/20:4(5Z,8Z,11Z,14Z)/0:0); DG(16:0/20:4(8Z,11Z,14Z,17Z)/0:0); DG(16:1(9Z)/20:3(5Z,8Z,11Z)/0:0); DG(16:1(9Z)/20:3(8Z,11Z,14Z)/0:0);	HMDB0007031	HMDB0007112	HMDB0007113	HMDB0007139	HMDB0007140
479.118__44.59	0.46056	-1.1185	0.035168	1.4539	1.30953	Cefepime; 4'-O-Methylepicatechin 7-O-glucuronide; Torachrysone 8-(6-oxalylglucoside); 3'-O-Methylepicatechin 7-O-glucuronide; 4'-O-Methyl-(-)-epicatechin 3'-O-glucuronide;	HMDB0015483	HMDB0029183	HMDB0039135	HMDB0041659	HMDB0041674
519.2944__328.37	0.46538	-1.1035	0.00060902	3.2154	1.73104	24,25-Diacetylvulgaroside; Digoxigenin monodigitoxoside;	HMDB0041366	HMDB0060819
303.0812__65.15	0.46575	-1.1024	0.066711	1.1758	1.19823	N-Acetylaspartylglutamic acid;	HMDB0001067
261.1346__214.43	0.46844	-1.0941	0.0023844	2.6226	1.60336	Gamma glutamyl ornithine; N6-beta-Aspartyllysine; Aspartyllysine; Aspartyl-Lysine; Lysylaspartic acid;	HMDB0002248	HMDB0004985	HMDB0004987	HMDB0028758	HMDB0028947
543.3298__263.74	0.46842	-1.0941	0.011497	1.9394	1.46102	Hovenidulcigenin A;	HMDB0041027
383.1146__142.17	0.47922	-1.0613	0.088611	1.0525	1.0879	S-Adenosylhomocysteine; (+)-Zeylenol; Oxyisocyclointegrin; Dulxanthone F; Isolicopyranocoumarin;	HMDB0000939	HMDB0029541	HMDB0030621	HMDB0034914	HMDB0035479
168.1022__244.19	0.48576	-1.0417	0.0042776	2.3688	1.51991	Homoarecoline;	HMDB0038321
191.107__637.41	0.49162	-1.0244	0.066235	1.1789	1.15763	2-Methyl-1-phenyl-2-propanyl acetate; 4-Phenyl-2-butyl acetate; Ethyl 4-phenylbutanoate; Benzyl 3-methylbutanoate; 3-Methylbutyl benzoate;	HMDB0031571	HMDB0031614	HMDB0031618	HMDB0032043	HMDB0033380
200.1287__211.41	0.49797	-1.0059	0.045759	1.3395	1.21652	Capryloylglycine; Valproylglycine; N-(5-Methyl-3-oxohexyl)alanine; N-Acetylaminooctanoic acid;	HMDB0000832	HMDB0013116	HMDB0041540	HMDB0059745
247.1704__419.5	0.49883	-1.0034	0.074544	1.1276	1.06191	Dimethylbenzyl carbinyl hexanoate; [2-(Dimethoxymethyl)-1-heptenyl]benzene; Furanofukinin; Octyl phenylacetate; 2-Phenylethyl octanoate;	HMDB0032228	HMDB0036221	HMDB0036640	HMDB0037713	HMDB0037719
333.0919__201.08	2.0287	1.0205	0.066599	1.1765	1.13876	Penicillin G; (S)-a-Amino-2,5-dihydro-5-oxo-4-isoxazolepropanoic acid N2-glucoside;	HMDB0015186	HMDB0029404
381.1743__530.25	2.047	1.0335	0.00010454	3.9807	1.80962	1,2,10-Trihydroxydihydro-trans-linalyl oxide 7-O-beta-D-glucopyranoside;	HMDB0033237
569.2739__351.22	2.0485	1.0346	0.0079745	2.0983	1.44912	Ganoderic acid F;	HMDB0035988
293.0969__197.07	2.1208	1.0846	0.096511	1.0154	1.02166	Distichonic acid A; Distichonic acid B;	HMDB0038752	HMDB0038753
289.0018__142.86	2.1344	1.0938	0.064544	1.1901	1.13836	3-[3-methoxy-4-(sulfooxy)phenyl]-2-oxopropanoic acid; 3-[3-hydroxy-5-methoxy-4-(sulfooxy)phenyl]prop-2-enoic acid; 3-[3-methoxy-4-(sulfooxy)phenyl]oxirane-2-carboxylic acid;	HMDB0126595	HMDB0127966	HMDB0127977
268.0476__270.23	2.1511	1.1051	0.0028171	2.5502	1.59913	2-{[hydroxy(6-hydroxy-7-methoxy-2H-1,3-benzodioxol-5-yl)methylidene]amino}acetic acid; 2-{[hydroxy(7-hydroxy-6-methoxy-2H-1,3-benzodioxol-5-yl)methylidene]amino}acetic acid;	HMDB0128732	HMDB0128737
451.1712__372.33	2.188	1.1296	0.022586	1.6462	1.23814	Heteroartonin A;	HMDB0041323
356.189__395.31	2.2445	1.1664	0.025213	1.5984	1.2956	Nalbuphine; (S)-Laudanosine; 5-hydroxypropafenone;	HMDB0014982	HMDB0030213	HMDB0060988
649.2709__267.86	2.2713	1.1835	0.07158	1.1452	1.11541	6-{4-[3-(3,7-dimethylocta-2,6-dien-1-yl)-7-hydroxy-8-(3-methylbut-2-en-1-yl)-4-oxo-4H-chromen-2-yl]-3-hydroxyphenoxy}-3,4,5-trihydroxyoxane-2-carboxylic acid; 6-{2-[3-(3,7-dimethylocta-2,6-dien-1-yl)-7-hydroxy-8-(3-methylbut-2-en-1-yl)-4-oxo-4H-chromen-2-yl]-5-hydroxyphenoxy}-3,4,5-trihydroxyoxane-2-carboxylic acid; 6-{[2-(2,4-dihydroxyphenyl)-3-(3,7-dimethylocta-2,6-dien-1-yl)-8-(3-methylbut-2-e…	HMDB0129666	HMDB0129667	HMDB0129668
909.5514__498.69	2.2846	1.192	0.087331	1.0588	1.06334	PI(18:0/22:6(4Z,7Z,10Z,13Z,16Z,19Z)); PI(18:3(6Z,9Z,12Z)/22:3(10Z,13Z,16Z)); PI(18:3(9Z,12Z,15Z)/22:3(10Z,13Z,16Z)); PI(20:3(5Z,8Z,11Z)/20:3(5Z,8Z,11Z)); PI(20:3(5Z,8Z,11Z)/20:3(8Z,11Z,14Z));	HMDB0009821	HMDB0009861	HMDB0009865	HMDB0009884	HMDB0009885
493.2597__278.49	2.2929	1.1971	1.9114e-05	4.7187	1.88666	Imatinib;	HMDB0014757
491.3415__523.48	2.2942	1.198	0.059842	1.223	1.10455	Homodolicholide;	HMDB0033907
381.096__108.33	2.305	1.2048	0.027299	1.5639	1.29282	Mollicellin A; Mollicellin B; Artonin K; 3,5-dihydroxy-2-(4-hydroxy-3-methoxyphenyl)-8,8-dimethyl-4H,8H-pyrano[2,3-f]chromen-4-one; 2-(2,4-dihydroxy-5-methoxyphenyl)-5-hydroxy-8,8-dimethyl-4H,8H-pyrano[3,2-g]chromen-4-one;	HMDB0033339	HMDB0033340	HMDB0040673	HMDB0127405	HMDB0127441
465.2281__254.91	2.3299	1.2203	0.022438	1.649	1.33727	Dolichyl b-D-glucosyl phosphate;	HMDB0001054
449.0706__190.16	2.3482	1.2315	4.3423e-05	4.3623	1.79052	Myricetin 3-arabinoside;	HMDB0041635
439.286__457.14	2.3607	1.2392	0.050617	1.2957	1.21735	13'-Carboxy-gamma-tocotrienol; Suillin; 2-Acetoxy-3-geranylgeranyl-1,4-dihydroxybenzene; Bolegrevilol;	HMDB0012558	HMDB0034349	HMDB0040748	HMDB0040764
209.0287__68.03	2.3732	1.2468	0.028656	1.5428	1.26807	Galactaric acid; Glucaric acid;	HMDB0000639	HMDB0000663
176.0379__101.36	2.3924	1.2585	0.0035979	2.444	1.49407	N-Formyl-L-methionine; Cycloalliin; Isoalliin; (R)C(S)S-Alliin; N-Acetyl-S-methylcysteine;	HMDB0001015	HMDB0029417	HMDB0029441	HMDB0033592	HMDB0240544
595.2901__361.67	2.3978	1.2617	0.034844	1.4579	1.22491	LysoPI(18:2(9Z,12Z)/0:0);	HMDB0240597
181.0497__60.3	2.4066	1.267	0.040499	1.3926	1.15986	Homovanillic acid; Isohomovanillic acid; 3,4-Dihydroxyhydrocinnamic acid; Hydroxyphenyllactic acid; 3-(3-Hydroxyphenyl)-3-hydroxypropanoic acid;	HMDB0000118	HMDB0000333	HMDB0000423	HMDB0000755	HMDB0002643
172.9905__163.95	2.4451	1.2899	0.026277	1.5804	1.29422	Phenol sulphate;	HMDB0060015
465.1277__173.32	2.6194	1.3892	0.076314	1.1174	1.11568	Melledonal B; 3,4,5-trihydroxy-2-[hydroxy(3,4,5-trihydroxyoxan-2-yl)methyl]-4-[3,4,5-trihydroxy-6-(hydroxymethyl)oxan-2-yl]cyclohexa-2,5-dien-1-one;	HMDB0037043	HMDB0128223
389.12__389.6	2.6249	1.3923	0.019006	1.7211	1.34843	trans-Piceid; (Z)-Resveratrol 4'-glucoside; cis-Piceid; (E)-2-Glucosyl-3,4',5-trihydroxystilbene; 3,4,5-trihydroxy-6-(2-hydroxy-1,2-diphenylethoxy)oxane-2-carboxylic acid;	HMDB0030564	HMDB0030565	HMDB0031422	HMDB0036294	HMDB0135201
571.2192__234.34	2.6659	1.4146	0.0081068	2.0912	1.45977	5alpha-Ethoxy-6beta-hydroxy-5,6-dihydrophysalin B;	HMDB0029626
194.0453__157.42	2.7485	1.4587	0.042972	1.3668	1.23232	Salicyluric acid; Dopaquinone; 4-Carboxyphenylglycine; Alpha-Hydroxyhippuric acid; Leucodopachrome;	HMDB0000840	HMDB0001229	HMDB0002016	HMDB0002404	HMDB0004067
623.2011__291.16	2.7671	1.4684	0.020325	1.692	1.33463	Acteoside; Isoacteoside;	HMDB0034843	HMDB0041025
413.1058__193.7	2.8098	1.4904	0.04161	1.3808	1.18277	5-(3',4',5'-trihydroxyphenyl)-gamma-valerolactone-O-methyl-4'-O-glucuronide; 5-(3',4',5'-trihydroxyphenyl)-gamma-valerolactone-O-methyl-5'-O-glucuronide; 3,4,5-trihydroxy-6-{[3-(3,4,5-trimethoxyphenyl)prop-2-enoyl]oxy}oxane-2-carboxylic acid; 6-{[3-(6,7-dimethoxy-2H-1,3-benzodioxol-5-yl)prop-2-en-1-yl]oxy}-3,4,5-trihydroxyoxane-2-carboxylic acid;	HMDB0060027	HMDB0060028	HMDB0124885	HMDB0128687
436.1373__186.93	2.8832	1.5277	0.0057718	2.2387	1.5011	Phenethyl 6-galloylglucoside; Phlorizin; Trilobatin; 2-(3-hydroxyphenyl)-6-[3,4,5-trihydroxy-6-(hydroxymethyl)oxan-2-yl]-3,4-dihydro-2H-1-benzopyran-3,5,7-triol; 2-(3-hydroxyphenyl)-8-[3,4,5-trihydroxy-6-(hydroxymethyl)oxan-2-yl]-3,4-dihydro-2H-1-benzopyran-3,5,7-triol;	HMDB0034573	HMDB0036634	HMDB0037505	HMDB0126679	HMDB0126705
272.1406__259.17	2.9426	1.5571	0.0035726	2.447	1.57936	N-Acetyl desmethyl frovatriptan;	HMDB0061158
351.0693__136.82	2.9619	1.5665	0.076638	1.1156	1.0955	7-Hydroxymethyl-12-methylbenz[a]anthracene sulfate;	HMDB0060420
173.986__96.69	3.0667	1.6167	0.081378	1.0895	1.03863	3-Hydroxypyridine sulfate;	HMDB0240652
489.2537__587.39	3.0906	1.6279	0.0048633	2.3131	1.50147	Lucidenic acid J;	HMDB0035700
400.0746__382.81	3.1376	1.6497	0.05199	1.2841	1.18406	5-Hexenyl glucosinolate;	HMDB0038416
423.1235__186.56	3.15	1.6554	0.061487	1.2112	1.04268	Flumiclorac-pentyl;	HMDB0034860
483.3158__324.5	3.1791	1.6686	0.011865	1.9257	1.35737	Liquoric acid; 24-Hydroxyglabrolide; Ganolucidic acid E; 21-Hydroxyisoglabrolide;	HMDB0034512	HMDB0035256	HMDB0037607	HMDB0039689
289.1228__175.08	3.2379	1.6951	0.027783	1.5562	1.25025	2-(4-Methyl-3-pentenyl)anthraquinone; trans-3,4-Dihydro-3,4-dihydroxy-7,12-dimethylbenz[a]anthracene; trans-5,6-Dihydro-5,6-dihydroxy-7,12-dimethylbenz[a]anthracene;	HMDB0040916	HMDB0060517	HMDB0060519
385.1638__400.32	3.3152	1.7291	0.028536	1.5446	1.34944	Porson; Isogingerenone B; Gingerenone B;	HMDB0030810	HMDB0035404	HMDB0035405
371.317__463.99	3.3308	1.7359	0.0087397	2.0585	1.52043	MG(19:0/0:0/0:0); MG(0:0/19:0/0:0); MG(0:0/i-19:0/0:0); MG(i-19:0/0:0/0:0);	HMDB0072839	HMDB0072840	HMDB0072876	HMDB0072881
255.114__260.46	3.351	1.7446	2.032e-05	4.6921	1.89332	1-(9H-Pyrido[3,4-b]indol-1-yl)-1,4-butanediol;	HMDB0035193
443.1015__143.16	3.3757	1.7552	0.017718	1.7516	1.38143	Rothindin; Betavulgarin xyloside; Formononetin 7-O-glucuronide; 6-(3,4-dihydroxy-6-methyl-5-oxooxan-2-yl)-5,7-dihydroxy-2-(4-hydroxy-3-methoxyphenyl)-4H-chromen-4-one; Formononetin 7-glucuronide;	HMDB0036609	HMDB0041214	HMDB0041735	HMDB0127323	HMDB0240517
457.0175__348.81	3.4306	1.7784	0.055014	1.2595	1.19717	C.I. Acid Red 13; Azorubine;	HMDB0033392	HMDB0036795
423.1701__427.29	3.513	1.8127	0.011584	1.9361	1.47525	Clindamycin;	HMDB0015321
266.0857__177.9	3.5438	1.8253	0.0074023	2.1306	1.45839	Neuraminic acid; N-(1-Deoxy-1-fructosyl)serine;	HMDB0000830	HMDB0037842
151.9835__167.62	3.5859	1.8423	0.00064986	3.1872	1.67092	Thiocysteine;	HMDB0003585
117.0334__272.87	3.6494	1.8677	3.7379e-05	4.4274	1.8531	2,4,6-Octatriyn-1-ol; Benzofuran; 3,5,7-Octatriyn-1-ol; xi-2,3-Octadiene-5,7-diyn-1-ol;	HMDB0030968	HMDB0032929	HMDB0038998	HMDB0040549
287.1041__229.23	3.6521	1.8687	0.0031025	2.5083	1.53317	Fospropofol; 3-Carboxy-2,3,4,9-tetrahydro-1H-pyrido[3,4-b]indole-1-propanoic acid;	HMDB0015661	HMDB0034881
379.0175__313.98	3.7439	1.9045	0.021356	1.6705	1.36477	Econazole;	HMDB0015259
463.0788__218.08	3.8099	1.9298	0.036906	1.4329	1.18875	Sorafenib;	HMDB0014542
507.2035__181.66	3.8558	1.947	4.8269e-06	5.3163	1.90421	6-O-Oleuropeoylsucrose;	HMDB0038117
540.1818__266.67	3.9397	1.9781	5.0504e-05	4.2967	1.83695	Torachrysone 8-(2-apiosylglucoside); Oleuroside; Oleuropein; Orientaloside;	HMDB0034612	HMDB0035352	HMDB0035872	HMDB0037100
338.2095__428.13	4.0827	2.0295	0.0045908	2.3381	1.57306	Propoxyphene; noracymethadol; nor-Levomethadyl acetate;	HMDB0014785	HMDB0061036	HMDB0061169
331.0584__91.14	4.1193	2.0424	0.046317	1.3343	1.15711	Fluorescein;	HMDB0014831
626.1429__184.21	4.1214	2.0431	0.0058284	2.2345	1.50687	Delphinidin 3,5-diglucoside; Delphinidin 3-gentiobioside; Delphinidin 3-sophoroside; Delphinidin 3-glucosylglucoside;	HMDB0030693	HMDB0038006	HMDB0038007	HMDB0041594
151.9834__215.29	4.1392	2.0494	1.3424e-05	4.8721	1.87137	Thiocysteine;	HMDB0003585
293.0518__48.45	4.2007	2.0706	0.057169	1.2428	1.11607	3,4,5-trihydroxy-6-[(3-methoxy-3-oxopropanoyl)oxy]oxane-2-carboxylic acid; 6-(1-carboxy-2-methoxy-2-oxoethyl)-3,4,5-trihydroxyoxane-2-carboxylic acid;	HMDB0130026	HMDB0130027
295.0431__58.55	4.2104	2.074	0.048706	1.3124	1.14241	Disulfiram; N-Acetyldjenkolic acid;	HMDB0014960	HMDB0029421
327.1243__235.28	4.2231	2.0783	0.0029513	2.53	1.58143	Acutilobin; 6-[(E)-2-(2,4-dihydroxyphenyl)ethenyl]-3-(3-methylbut-2-en-1-yl)benzene-1,2,4-triol; 2-[(E)-2-[3,5-dihydroxy-4-(3-methylbut-2-en-1-yl)phenyl]ethenyl]benzene-1,3,5-triol; 5-[(E)-2-[3,5-dihydroxy-4-(3-methylbut-2-en-1-yl)phenyl]ethenyl]benzene-1,2,4-triol; 4-[(E)-2-[3,5-dihydroxy-4-(3-methylbut-2-en-1-yl)phenyl]ethenyl]benzene-1,2,3-triol;	HMDB0040670	HMDB0125543	HMDB0125544	HMDB0125545	HMDB0125546
350.2089__412.08	4.2673	2.0933	0.0015903	2.7985	1.59719	Sphingosine 1-phosphate (d16:1-P);	HMDB0060061
435.1702__486.8	4.4672	2.1594	0.0013175	2.8803	1.65459	Flupenthixol;	HMDB0015013
288.1438__230.13	4.5835	2.1964	0.0022623	2.6455	1.58798	3-Methylglutarylcarnitine; O-Adipoylcarnitine;	HMDB0000552	HMDB0061677
339.1986__373.94	4.6521	2.2179	5.8613e-05	4.232	1.82944	Canrenone; Piperochromenoic acid;	HMDB0003033	HMDB0040635
400.1658__383.25	4.9759	2.315	0.00014941	3.8256	1.76608	Moxifloxacin;	HMDB0014363
245.1396__344.72	4.981	2.3164	0.094712	1.0236	1.05974	3-Hydroxydodecanedioic acid; Dibutyl malate;	HMDB0000413	HMDB0031696
405.1933__422.98	5.1526	2.3653	0.0044625	2.3504	1.58894	(1R,3R,4R,5S,6S,8x)-1-Acetoxy-8-angeloyloxy-3,4-epoxy-5-hydroxy-7(14),10-bisaboladien-2-one; 1-(4-Hydroxy-3,5-dimethoxyphenyl)-7-(4-hydroxy-3-methoxyphenyl)-3,5-heptanediol;	HMDB0039971	HMDB0041091
623.2014__239.1	5.4249	2.4396	1.5545e-08	7.8084	1.98262	Acteoside; Isoacteoside;	HMDB0034843	HMDB0041025
305.0968__226.97	5.4383	2.4432	0.029464	1.5307	1.23043	Fluconazole;	HMDB0014342
774.541__526.49	5.4682	2.4511	0.023653	1.6261	1.33928	PE(22:5(4Z,7Z,10Z,13Z,16Z)/P-18:1(11Z)); PE(22:5(4Z,7Z,10Z,13Z,16Z)/P-18:1(9Z)); PE(22:5(7Z,10Z,13Z,16Z,19Z)/P-18:1(11Z)); PE(22:5(7Z,10Z,13Z,16Z,19Z)/P-18:1(9Z)); PE(22:6(4Z,7Z,10Z,13Z,16Z,19Z)/P-18:0);	HMDB0009644	HMDB0009645	HMDB0009677	HMDB0009678	HMDB0009709
528.1718__200.34	5.4702	2.4516	5.3147e-05	4.2745	1.82033	Gluten exorphin B4;	HMDB0059794
297.039__43.47	5.5239	2.4657	0.0064019	2.1937	1.47246	3,8-Dihydroxy-9-methoxycoumestan; 3,8-Dihydroxy-1-methylanthraquinone-2-carboxylic acid; Sativol; Irilone; Glyzaglabrin;	HMDB0030562	HMDB0030830	HMDB0033722	HMDB0033820	HMDB0033859
291.0978__226.42	5.536	2.4688	0.0019173	2.7173	1.5861	(2S,4S)-Monatin;	HMDB0041309
417.1044__147	5.6198	2.4905	2.9367e-05	4.5321	1.84515	{4-[3-(5-methoxy-2,2-dimethyl-2H-chromen-6-yl)propanoyl]phenyl}oxidanesulfonic acid; {4-[1-hydroxy-3-(5-methoxy-2,2-dimethyl-2H-chromen-6-yl)prop-2-en-1-yl]phenyl}oxidanesulfonic acid; {[1-(4-hydroxyphenyl)-3-(5-methoxy-2,2-dimethyl-2H-chromen-6-yl)prop-2-en-1-yl]oxy}sulfonic acid;	HMDB0125860	HMDB0125877	HMDB0125878
411.0098__258.41	5.6426	2.4964	0.019042	1.7203	1.3979	dIDP;	HMDB0003536
422.1839__426.57	5.7038	2.5119	0.0026488	2.577	1.62042	Neopetasitenine;	HMDB0030329
471.1101__167.53	5.8101	2.5386	2.5651e-08	7.5909	1.96823	Clofazimine;	HMDB0014983
273.1249__189.19	6.0238	2.5907	5.3286e-06	5.2734	1.88347	Imazamethabenz;	HMDB0034885
451.0273__170.23	6.1746	2.6263	5.8133e-06	5.2356	1.91389	Allura red AC;	HMDB0032884
117.0334__226.3	6.3019	2.6558	2.7821e-08	7.5556	1.9639	2,4,6-Octatriyn-1-ol; Benzofuran; 3,5,7-Octatriyn-1-ol; xi-2,3-Octadiene-5,7-diyn-1-ol;	HMDB0030968	HMDB0032929	HMDB0038998	HMDB0040549
885.5514__443.83	6.8125	2.7682	0.095466	1.0202	1.07586	PI(16:0/22:4(10Z,13Z,16Z,19Z)); PI(16:0/22:4(7Z,10Z,13Z,16Z)); PI(18:0/20:4(5Z,8Z,11Z,14Z)); PI(18:0/20:4(8Z,11Z,14Z,17Z)); PI(18:1(11Z)/20:3(5Z,8Z,11Z));	HMDB0009793	HMDB0009794	HMDB0009815	HMDB0009816	HMDB0009830
388.1185__36.93	6.8219	2.7702	0.067062	1.1735	1.09722	xi-8-Acetonyldihydrosanguinarine;	HMDB0039896
399.1056__192.17	7.4749	2.9021	7.4167e-05	4.1298	1.82209	5-Hydroxyflavone; 5-hydroxy-7-methoxy-2-phenyl-8-(3,4,5-trihydroxyoxan-2-yl)-4H-chromen-4-one; 3,4,5-trihydroxy-6-{3-[(2E)-3-phenylprop-2-enoyl]phenoxy}oxane-2-carboxylic acid; 3,4,5-trihydroxy-6-{4-[(2E)-3-phenylprop-2-enoyl]phenoxy}oxane-2-carboxylic acid;	HMDB0040556	HMDB0127226	HMDB0135447	HMDB0135621
386.1615__436.96	7.9448	2.99	0.013724	1.8625	1.45451	3-(3,4-dimethoxyphenyl)-N-[2-(3,4-dimethoxyphenyl)-2-hydroxyethyl]prop-2-enimidic acid; 3-(3,4-dimethoxyphenyl)-N-[2-(3,4-dimethoxyphenyl)ethyl]oxirane-2-carboximidic acid; N-[2-(3,4-dimethoxyphenyl)ethyl]-3-(2-hydroxy-3,4-dimethoxyphenyl)prop-2-enimidic acid; N-[2-(3,4-dimethoxyphenyl)ethyl]-3-(2-hydroxy-4,5-dimethoxyphenyl)prop-2-enimidic acid; (2Z)-3-(3,4-dimethoxyphenyl)-N-[2-(3,4-dimethoxyph…	HMDB0135466	HMDB0135467	HMDB0135468	HMDB0135469	HMDB0135476
416.1382__383.03	8.2263	3.0402	0.00021729	3.663	1.76799	N-Acetyl gemifloxacin;	HMDB0060633
369.3011__461.68	10.321	3.3675	0.034709	1.4596	1.28533	Diethylhexyl adipate; Dioctyl hexanedioate;	HMDB0040270	HMDB0041619
360.9907__338.44	10.407	3.3795	0.043782	1.3587	1.25871	Bismuth Subsalicylate;	HMDB0015408
653.1578__258.21	11.195	3.4848	3.7938e-06	5.4209	1.92804	2-(S-Glutathionyl)acetyl glutathione;	HMDB0060343
415.2345__213.53	11.513	3.5252	1.5462e-05	4.8107	1.85702	Forasartan;	HMDB0015434
611.1637__234.38	12.694	3.6661	2.6101e-05	4.5833	1.87849	Safflomin A; Carthamidin 6,7-diglucoside; Aromadendrin 3,7-diglucoside; Hydroxysafflor yellow A; 3,4,5-trihydroxy-6-(3-{3,5,7-trihydroxy-6-[3,4,5-trihydroxy-6-(hydroxymethyl)oxan-2-yl]-3,4-dihydro-2H-1-benzopyran-2-yl}phenoxy)oxane-2-carboxylic acid;	HMDB0030558	HMDB0040125	HMDB0040559	HMDB0040677	HMDB0126696
469.3652__344.31	12.788	3.6767	1.3969e-07	6.8548	1.96042	Momoridcin; Ambolic acid;	HMDB0030512	HMDB0035713
308.9783__338.71	12.884	3.6875	0.079453	1.0999	1.12572	Ribose 1,5-bisphosphate;	HMDB0011688
493.2033__186.93	13.547	3.76	0.00042386	3.3728	1.72651	Fluocinonide;	HMDB0015181
665.1759__280.47	15.553	3.9591	2.932e-06	5.5328	1.91801	7-(4-Carboxy-3-hydroxy-3-methylbutanoyl)sudachitin 4'-glucoside; Sudachiin B; Sudachiin C; 6''-O-Malonylnaringin;	HMDB0037337	HMDB0039087	HMDB0039088	HMDB0039776
741.2651__315.84	16.215	4.0193	8.4736e-05	4.0719	1.7869	Licoagrone; Liriodendrin;	HMDB0033614	HMDB0036410
412.9835__317.24	22.132	4.4681	0.0063479	2.1974	1.54666	[2,6-dihydroxy-3-(3,5,6,7-tetrahydroxy-4-oxo-4H-chromen-2-yl)phenyl]oxidanesulfonic acid;	HMDB0129448
739.4284__278.97	22.241	4.4751	2.5207e-05	4.5985	1.84522	Torvoside C; Asparagoside C; Desglucodesrhamnoparillin; 25-Epiruizgenin 3-[4''-rhamnosylglucoside]; Schidigerasaponin D5;	HMDB0029623	HMDB0031835	HMDB0033493	HMDB0035490	HMDB0036248
264.0881__184.82	23.995	4.5847	0.00089868	3.0464	1.64096	2-(2-Phenylacetoxy)propionylglycine; N-Phenylacetylglutamic acid;	HMDB0059732	HMDB0059772

## Sheet: NEG_RK_vs_STZ
ID	FC	log2(FC)	raw.pval	#NAME?	VIP	Compound	HMDBID
489.9944__49.32	720.13	9.4921	0.03044	1.5166	1.23308	Deoxyadenosine triphosphate;	HMDB0001532
426.0228__38.95	522.6	9.0296	0.0016091	2.7934	1.61653	Adenosine 3',5'-diphosphate; dGDP; ADP;	HMDB0000061	HMDB0000960	HMDB0001341
662.1032__108.69	356.94	8.4795	0.010454	1.9807	1.40944	NAD; Fenugreekine;	HMDB0000902	HMDB0039421
338.989__22.72	115.5	6.8518	0.012605	1.8995	1.38274	D-myo-Inositol 1,4-bisphosphate; D-Fructose 2,6-bisphosphate; Fructose 1,6-bisphosphate; alpha-D-Glucose 1,6-bisphosphate; D-myo-Inositol 1,3-bisphosphate;	HMDB0000968	HMDB0001047	HMDB0001058	HMDB0003514	HMDB0006234
867.5104__605.24	98.457	6.6214	0.0015777	2.802	1.61521	Koryoginsenoside R1;	HMDB0041351
304.134__112.34	93.567	6.5479	0.00045493	3.3421	1.70313	Benzosimuline;	HMDB0031930
385.0506__291.97	70.464	6.1388	0.00050545	3.2963	1.69542	Lithol Rubine;	HMDB0041567
306.1173__423.15	51.949	5.699	0.00064686	3.1892	1.68013	1,N2-propanodeoxyguanosine;	HMDB0059780
240.0513__21.94	34.212	5.0964	0.0024231	2.6156	1.56715	2,4-Dihydroxy-6,7-dimethoxy-2H-1,4-benzoxazin-3(4H)-one; 2,4-Dihydroxy-7,8-dimethoxy-2H-1,4-benzoxazin-3(4H)-one; 2-{[(3,4-dihydroxy-5-methoxyphenyl)(hydroxy)methylidene]amino}acetic acid; 2-{[(2,4-dihydroxy-5-methoxyphenyl)(hydroxy)methylidene]amino}acetic acid; 2-{[(2,4-dihydroxy-3-methoxyphenyl)(hydroxy)methylidene]amino}acetic acid;	HMDB0037548	HMDB0037549	HMDB0128021	HMDB0128045	HMDB0128056
264.1009__142.88	31.344	4.9701	0.001196	2.9223	1.63539	Anonaine; Eduleine; Eduline; Agaritinal;	HMDB0030348	HMDB0037594	HMDB0040597	HMDB0040694
303.0554__22.48	20.71	4.3723	0.0049834	2.3025	1.51179	(5-hydroxy-7-methoxy-2,2-dimethyl-3,4-dihydro-2H-1-benzopyran-4-yl)oxidanesulfonic acid; 5-(3-methoxyphenyl)-4-(sulfooxy)pentanoic acid; 5-[3-methoxy-4-(sulfooxy)phenyl]pentanoic acid;	HMDB0125817	HMDB0127785	HMDB0127792
347.0402__46.12	20.276	4.3417	0.0026074	2.5838	1.57252	Inosinic acid; Inosine 2'-phosphate; 2-(2,5-dihydroxy-4-methoxyphenyl)-3,5,6,7-tetrahydroxy-4H-chromen-4-one; 3,5,7-trihydroxy-6-methoxy-2-(3,4,5-trihydroxyphenyl)-4H-chromen-4-one; 3,5,7-trihydroxy-6-methoxy-2-(2,3,4-trihydroxyphenyl)-4H-chromen-4-one;	HMDB0000175	HMDB0011681	HMDB0129456	HMDB0131883	HMDB0131884
320.0627__27.9	20.276	4.3417	0.0024327	2.6139	1.56842	Beta-Citryl-L-glutamic acid;	HMDB0013220
296.0824__187.17	17.145	4.0997	0.0015339	2.8142	1.60476	5,5',6,6'-Tetrahydroxy-3,3'-biindolyl; 5-Hydroxy-4-methoxy-3-methyl-2,6-canthinedione; Phenytoin methylcatechol;	HMDB0029301	HMDB0040798	HMDB0060867
342.0971__187.52	16.311	4.0278	0.011146	1.9529	1.39181	Avenanthramide 1s; Caffeoyl tyrosine; p-Coumaroyl 3-hydroxytyrosine;	HMDB0029285	HMDB0029295	HMDB0029296
449.1055__27.22	14.877	3.895	0.033749	1.4717	1.21354	Miscanthoside; Maesopsin 6-glucoside; Astilbin; Neocarthamin; Phloretin 2'-O-glucuronide;	HMDB0029544	HMDB0031555	HMDB0033850	HMDB0037476	HMDB0041768
453.1717__110.55	14.78	3.8856	0.0001842	3.7347	1.7576	alpha-CEHC glucuronide;	HMDB0062445
865.5044__608.4	14.569	3.8649	0.0012251	2.9118	1.62522	PG(22:6(4Z,7Z,10Z,13Z,16Z,19Z)/22:6(4Z,7Z,10Z,13Z,16Z,19Z));	HMDB0116605
815.5691__328.61	14.053	3.8128	0.0054542	2.2633	1.4891	3alpha,7alpha,12beta-Trihydroxy-5beta-cholanoic acid; 3a,4b,7a-Trihydroxy-5b-cholanoic acid; 1b,3a,12a-Trihydroxy-5b-cholanoic acid; 3a,4b,12a-Trihydroxy-5b-cholanoic acid; 3a,6a,7b-Trihydroxy-5b-cholanoic acid;	HMDB0000312	HMDB0000320	HMDB0000326	HMDB0000330	HMDB0000364
841.5031__640.74	13.984	3.8057	0.0019018	2.7208	1.59605	PG(22:6(4Z,7Z,10Z,13Z,16Z,19Z)/20:4(8Z,11Z,14Z,17Z)); PG(20:4(5Z,8Z,11Z,14Z)/22:6(4Z,7Z,10Z,13Z,16Z,19Z)); PG(22:6(4Z,7Z,10Z,13Z,16Z,19Z)/20:4(5Z,8Z,11Z,14Z));	HMDB0116604	HMDB0116613	HMDB0116742
343.092__187.07	12.491	3.6429	0.00162	2.7905	1.61584	dehydronifedipine;	HMDB0061041
393.265__315.56	12.257	3.6156	0.0003038	3.5174	1.72005	11-Hydroxyeicosatetraenoate glyceryl ester; 2-(14,15-Epoxyeicosatrienoyl) Glycerol;	HMDB0012530	HMDB0013651
343.1708__431.94	10.984	3.4574	0.035744	1.4468	1.20338	Clemastine;	HMDB0014428
310.1089__367.12	9.9153	3.3097	0.0014419	2.8411	1.61672	Launobine; Norisodomesticine; (S)-Nandigerine; (+)-Norushinsunine N-oxide; Annocherine B;	HMDB0030217	HMDB0033361	HMDB0033362	HMDB0034489	HMDB0036369
412.9835__317.24	9.3113	3.219	0.089978	1.0459	1.03777	[2,6-dihydroxy-3-(3,5,6,7-tetrahydroxy-4-oxo-4H-chromen-2-yl)phenyl]oxidanesulfonic acid;	HMDB0129448
135.0551__160.17	9.0365	3.1758	0.00096317	3.0163	1.65644	N-Methylnicotinamide; 2-Acetyl-3-methylpyrazine; 2-Aminobenzamide; 4-Acetyl-2-methylpyrimidine; 2-Methylnicotinamide;	HMDB0003152	HMDB0030001	HMDB0033947	HMDB0037819	HMDB0059711
784.1514__161.83	8.7204	3.1244	0.00092069	3.0359	1.65376	Degalloyltheaflavonin;	HMDB0040548
521.9839__32.74	8.0332	3.006	0.0009456	3.0243	1.63599	Guanosine triphosphate; 8-Oxo-dGTP;	HMDB0001273	HMDB0011615
396.2476__470.88	7.9817	2.9967	0.00093421	3.0296	1.65737	Phytosphingosine-1-P;	HMDB0012280
203.0013__133.42	7.9009	2.982	0.015847	1.8	1.34556	O-methoxycatechol-O-sulphate; 4-Methylcatechol 1-sulfate; 4-Methylcatechol 2-sulfate; 3-Methylcatechol 1-sulfate; 3-Methylcatechol 2-sulfate;	HMDB0060013	HMDB0240459	HMDB0240461	HMDB0240662	HMDB0240663
916.6037__586.16	7.8851	2.9791	0.035854	1.4455	1.23711	PS(22:6(4Z,7Z,10Z,13Z,16Z,19Z)/24:1(15Z)); PS(24:1(15Z)/22:6(4Z,7Z,10Z,13Z,16Z,19Z));	HMDB0112880	HMDB0116796
255.1142__325.97	7.5356	2.9137	0.00074689	3.1267	1.67339	1-(9H-Pyrido[3,4-b]indol-1-yl)-1,4-butanediol;	HMDB0035193
290.1223__455.4	7.5124	2.9093	0.00020466	3.689	1.73672	S-(3-Methylbutanoyl)-dihydrolipoamide-E; S-(2-Methylbutanoyl)-dihydrolipoamide;	HMDB0006867	HMDB0006869
496.2422__98.2	7.4811	2.9033	0.00023333	3.632	1.74806	N1,N10-Diferuloylspermidine;	HMDB0033471
626.1429__184.21	7.4774	2.9025	0.0068764	2.1626	1.47962	Delphinidin 3,5-diglucoside; Delphinidin 3-gentiobioside; Delphinidin 3-sophoroside; Delphinidin 3-glucosylglucoside;	HMDB0030693	HMDB0038006	HMDB0038007	HMDB0041594
620.0208__42.57	7.4724	2.9016	8.5951e-05	4.0657	1.80099	ADP-ribose 1"-2" cyclic phosphate;	HMDB0011671
743.0727__42.35	7.3328	2.8744	9.6156e-06	5.017	1.87167	NADP;	HMDB0000217
443.1015__143.16	7.2647	2.8609	0.02091	1.6796	1.30608	Rothindin; Betavulgarin xyloside; Formononetin 7-O-glucuronide; 6-(3,4-dihydroxy-6-methyl-5-oxooxan-2-yl)-5,7-dihydroxy-2-(4-hydroxy-3-methoxyphenyl)-4H-chromen-4-one; Formononetin 7-glucuronide;	HMDB0036609	HMDB0041214	HMDB0041735	HMDB0127323	HMDB0240517
339.2329__494.09	7.1123	2.8303	0.08447	1.0733	1.01947	Plastoquinone 3; 1,1'-[1,11-Undecanediylbis(oxy)]bisbenzene;	HMDB0033786	HMDB0039762
339.05__301.87	6.9544	2.7979	0.0012241	2.9122	1.63701	Grevilline B; Salvianolic acid D; Sulforaphane-N-acetylcysteine; 15,17-dihydroxy-11-methoxy-6,8,20-trioxapentacyclo[10.8.0.0²,⁹.0³,⁷.0¹⁴,¹⁹]icosa-1(12),2(9),4,10,14,16,18-heptaen-13-one; 15,16-dihydroxy-11-methoxy-6,8,20-trioxapentacyclo[10.8.0.0²,⁹.0³,⁷.0¹⁴,¹⁹]icosa-1(12),2(9),4,10,14(19),15,17-heptaen-13-one;	HMDB0033240	HMDB0041773	HMDB0061113	HMDB0128862	HMDB0128863
459.3274__552.83	6.7905	2.7635	0.020487	1.6885	1.29763	all-trans-Carophyll yellow;	HMDB0032879
468.1298__41.55	6.7487	2.7546	5.6289e-06	5.2496	1.87189	O-Methyl-4-[(2',3',4'-tri-O-acetyl-alpha-L-rhamnosyloxy)benzyl]thiocarbamate; 3-(3,4-dimethoxyphenyl)-N-[2-(3,4-dimethoxyphenyl)ethyl]-3-(sulfooxy)propanimidic acid; 3-(3,4-dimethoxyphenyl)-N-[2-(3,4-dimethoxyphenyl)-2-(sulfooxy)ethyl]propanimidic acid; 3-(3,4-dimethoxyphenyl)-N-[2-(3,4-dimethoxyphenyl)ethyl]-2-(sulfooxy)propanimidic acid;	HMDB0031943	HMDB0135504	HMDB0135506	HMDB0135508
297.0611__80.5	6.4409	2.6873	4.3402e-06	5.3625	1.87288	Benzoyl glucuronide (Benzoic acid); 6-(benzoyloxy)-3,4,5-trihydroxyoxane-2-carboxylic acid;	HMDB0010324	HMDB0125176
558.065__42.61	6.3272	2.6616	7.5019e-07	6.1248	1.91658	Adenosine diphosphate ribose; Phosphoribosyl-AMP;	HMDB0001178	HMDB0012276
428.0272__37.95	6.1925	2.6305	8.0192e-06	5.0959	1.87287	Cloransulam-methyl;	HMDB0033147
885.5518__643.94	6.134	2.6168	0.05611	1.251	1.11309	PI(16:0/22:4(10Z,13Z,16Z,19Z)); PI(16:0/22:4(7Z,10Z,13Z,16Z)); PI(18:0/20:4(5Z,8Z,11Z,14Z)); PI(18:0/20:4(8Z,11Z,14Z,17Z)); PI(18:1(11Z)/20:3(5Z,8Z,11Z));	HMDB0009793	HMDB0009794	HMDB0009815	HMDB0009816	HMDB0009830
289.102__293.55	6.0721	2.6022	7.2141e-06	5.1418	1.87588	N-Succinyl-L,L-2,6-diaminopimelate;	HMDB0012267
114.0547__31.75	5.9324	2.5686	0.022617	1.6456	1.29249	L-Proline; D-Proline; Acetamidopropanal; 4-Amino-2-methylenebutanoic acid; Pterolactam;	HMDB0000162	HMDB0003411	HMDB0012880	HMDB0030409	HMDB0034208
581.2415__355.91	5.8262	2.5426	1.7434e-08	7.7586	1.95906	Biliverdin;	HMDB0001008
808.1201__145.51	5.7353	2.5199	3.2995e-09	8.4815	1.9654	Acetyl-CoA;	HMDB0001206
819.5196__559.06	5.7092	2.5133	0.075224	1.1236	1.05896	PG(18:1(11Z)/22:6(4Z,7Z,10Z,13Z,16Z,19Z)); PG(18:1(9Z)/22:6(4Z,7Z,10Z,13Z,16Z,19Z)); PG(18:2(9Z,12Z)/22:5(4Z,7Z,10Z,13Z,16Z)); PG(18:2(9Z,12Z)/22:5(7Z,10Z,13Z,16Z,19Z)); PG(18:3(6Z,9Z,12Z)/22:4(7Z,10Z,13Z,16Z));	HMDB0010629	HMDB0010644	HMDB0010657	HMDB0010658	HMDB0010671
843.518__506.41	5.7011	2.5112	0.039768	1.4005	1.1985	PGP(a-13:0/i-22:0); PGP(i-13:0/i-22:0); PG(22:6(4Z,7Z,10Z,13Z,16Z,19Z)/20:3(5Z,8Z,11Z)); PG(22:6(4Z,7Z,10Z,13Z,16Z,19Z)/20:3(8Z,11Z,14Z)); PG(20:4(5Z,8Z,11Z,14Z)/22:5(4Z,7Z,10Z,13Z,16Z));	HMDB0116528	HMDB0116564	HMDB0116602	HMDB0116603	HMDB0116611
526.2239__280.76	5.6836	2.5068	7.2747e-09	8.1382	1.96544	Hygromycin B; 2-amino-4-({1-[(carboxymethyl)-C-hydroxycarbonimidoyl]-2-[(2,3-dihydroxy-2-pentyl-1-phenylpropyl)sulfanyl]ethyl}-C-hydroxycarbonimidoyl)butanoic acid; 2-amino-4-({1-[(carboxymethyl)-C-hydroxycarbonimidoyl]-2-[(1,3-dihydroxy-2-pentyl-1-phenylpropan-2-yl)sulfanyl]ethyl}-C-hydroxycarbonimidoyl)butanoic acid;	HMDB0034229	HMDB0126538	HMDB0126539
490.9979__40.58	5.5588	2.4748	7.324e-09	8.1353	1.96493	Deoxyadenosine triphosphate;	HMDB0001532
532.1979__234.85	5.5577	2.4745	6.8381e-09	8.1651	1.96112	3,4,5-trihydroxy-6-{[4-hydroxy-7-methoxy-2,2-dimethyl-6-(3-phenylpropanoyl)-3,4-dihydro-2H-1-benzopyran-5-yl]oxy}oxane-2-carboxylic acid;	HMDB0125834
537.0877__167.01	5.3858	2.4292	1.6718e-09	8.7768	1.97558	6-{[3,7-dihydroxy-2-(1-hydroxy-3-methoxy-4-oxocyclohexa-2,5-dien-1-yl)-6-methoxy-4-oxo-4H-chromen-5-yl]oxy}-3,4,5-trihydroxyoxane-2-carboxylic acid; 6-{[3,5-dihydroxy-2-(1-hydroxy-3-methoxy-4-oxocyclohexa-2,5-dien-1-yl)-6-methoxy-4-oxo-4H-chromen-7-yl]oxy}-3,4,5-trihydroxyoxane-2-carboxylic acid; 6-{[5,7-dihydroxy-2-(1-hydroxy-3-methoxy-4-oxocyclohexa-2,5-dien-1-yl)-6-methoxy-4-oxo-4H-chromen-3-y…	HMDB0128780	HMDB0128781	HMDB0128782
866.1619__152.52	5.3586	2.4218	1.7646e-09	8.7533	1.9744	2-Methyl-3-hydroxybutyryl-CoA; 3-Hydroxyisovaleryl-CoA;	HMDB0001356	HMDB0006870
675.0903__85.69	5.3133	2.4096	2.6253e-11	10.581	1.98467	({6-[5,7-dihydroxy-4-oxo-8-(3,4,5-trihydroxyoxan-2-yl)-2-(2,4,5-trihydroxyphenyl)-4H-chromen-6-yl]-3,4,5-trihydroxyoxan-2-yl}methoxy)sulfonic acid; (2-{5,7-dihydroxy-4-oxo-6-[3,4,5-trihydroxy-6-(hydroxymethyl)oxan-2-yl]-2-(2,4,5-trihydroxyphenyl)-4H-chromen-8-yl}-4,5-dihydroxyoxan-3-yl)oxidanesulfonic acid; (2-{5,7-dihydroxy-4-oxo-6-[3,4,5-trihydroxy-6-(hydroxymethyl)oxan-2-yl]-2-(2,4,5-trihydrox…	HMDB0126903	HMDB0126904	HMDB0126905	HMDB0126906	HMDB0126907
116.0164__90.36	5.2906	2.4034	8.3107e-10	9.0804	1.97793	Homocysteine thiolactone;	HMDB0002287
471.1101__167.53	5.1351	2.3604	0.0043658	2.3599	1.51829	Clofazimine;	HMDB0014983
119.0336__27.24	5.0873	2.3469	0.022366	1.6504	1.32873	(S)-3,4-Dihydroxybutyric acid; 2,4-Dihydroxybutanoic acid; 4-Deoxyerythronic acid; 4-Deoxythreonic acid; A,b-Dihydroxyisobutyric acid;	HMDB0000337	HMDB0000360	HMDB0000498	HMDB0002453	HMDB0002601
281.1186__338.6	5.0387	2.333	0.0011593	2.9358	1.63702	Isoeugenol phenylacetate;	HMDB0037278
1190.7617__592.85	4.9824	2.3168	0.054841	1.2609	1.13362	CDP-DG(a-25:0/i-24:0); CDP-DG(i-24:0/a-25:0);	HMDB0116150	HMDB0116353
388.1196__384.55	4.895	2.2913	0.002578	2.5887	1.5653	xi-8-Acetonyldihydrosanguinarine;	HMDB0039896
883.536__466.07	4.8784	2.2864	0.087671	1.0571	1.05802	PI(16:0/22:5(4Z,7Z,10Z,13Z,16Z)); PI(16:0/22:5(7Z,10Z,13Z,16Z,19Z)); PI(16:2(9Z,12Z)/22:3(10Z,13Z,16Z)); PI(18:1(11Z)/20:4(5Z,8Z,11Z,14Z)); PI(18:1(11Z)/20:4(8Z,11Z,14Z,17Z));	HMDB0009795	HMDB0009796	HMDB0009804	HMDB0009832	HMDB0009833
243.1236__215.05	4.7316	2.2423	0.002351	2.6287	1.57676	Polyethylene, oxidized;	HMDB0032472
909.5514__498.69	4.6445	2.2155	0.021192	1.6738	1.33388	PI(18:0/22:6(4Z,7Z,10Z,13Z,16Z,19Z)); PI(18:3(6Z,9Z,12Z)/22:3(10Z,13Z,16Z)); PI(18:3(9Z,12Z,15Z)/22:3(10Z,13Z,16Z)); PI(20:3(5Z,8Z,11Z)/20:3(5Z,8Z,11Z)); PI(20:3(5Z,8Z,11Z)/20:3(8Z,11Z,14Z));	HMDB0009821	HMDB0009861	HMDB0009865	HMDB0009884	HMDB0009885
663.1061__107.72	4.587	2.1975	0.00064624	3.1896	1.67026	NAD; Fenugreekine;	HMDB0000902	HMDB0039421
134.0461__188.89	4.5839	2.1966	0.00082006	3.0862	1.66247	Adenine;	HMDB0000034
201.0189__270.87	4.4993	2.1697	0.0024858	2.6045	1.57386	Bergaptol; Xanthotoxol;	HMDB0013679	HMDB0029457
451.2709__308.23	4.4057	2.1394	0.00078571	3.1047	1.6651	LysoPE(0:0/16:1(9Z)); LysoPE(16:1(9Z)/0:0); Cytochalasin Opho;	HMDB0011474	HMDB0011504	HMDB0035366
903.4648__417.52	4.2362	2.0828	0.058202	1.2351	1.13275	CL(8:0/8:0/8:0/8:0);	HMDB0116797
441.3165__241.55	4.204	2.0718	0.014578	1.8363	1.36584	(all-E)-6'-Apo-y-caroten-6'-al;	HMDB0040118
290.082__82.89	4.1948	2.0686	0.00019283	3.7148	1.76282	Avenalumin III;	HMDB0038956
884.5393__472.4	4.0699	2.025	0.021368	1.6702	1.33095	PS(22:4(7Z,10Z,13Z,16Z)/22:5(4Z,7Z,10Z,13Z,16Z)); PS(22:4(7Z,10Z,13Z,16Z)/22:5(7Z,10Z,13Z,16Z,19Z)); PS(22:5(4Z,7Z,10Z,13Z,16Z)/22:4(7Z,10Z,13Z,16Z)); PS(22:5(7Z,10Z,13Z,16Z,19Z)/22:4(7Z,10Z,13Z,16Z));	HMDB0112811	HMDB0112812	HMDB0112834	HMDB0112859
300.088__319.85	3.9297	1.9744	0.0010258	2.9889	1.64217	Citpressine I; Citrusinine I;	HMDB0029323	HMDB0030374
722.5117__522.08	3.7483	1.9062	0.068425	1.1648	1.0839	PE(18:3(6Z,9Z,12Z)/P-18:1(11Z)); PE(18:3(6Z,9Z,12Z)/P-18:1(9Z)); PE(18:3(9Z,12Z,15Z)/P-18:1(11Z)); PE(18:3(9Z,12Z,15Z)/P-18:1(9Z)); PE(18:4(6Z,9Z,12Z,15Z)/P-18:0);	HMDB0009149	HMDB0009150	HMDB0009182	HMDB0009183	HMDB0009214
337.0546__301.73	3.7364	1.9016	0.0008325	3.0796	1.66366	2-Oxoclopidogrel;	HMDB0013929
451.1983__228.62	3.7233	1.8966	0.0015876	2.7992	1.61644	8-Butanoylneosolaniol; 8-Isobutanoylneosolaniol;	HMDB0038560	HMDB0038561
357.0873__142.9	3.6353	1.8621	0.005984	2.223	1.46903	N1-(5-Phospho-a-D-ribosyl)-5,6-dimethylbenzimidazole;	HMDB0003882
284.0932__364.08	3.5798	1.8399	0.0040146	2.3964	1.53783	Letrozole; Arborinine;	HMDB0015141	HMDB0030177
749.5332__631.16	3.4376	1.7814	0.03096	1.5092	1.24917	PG(16:0/18:0); PG(18:0/16:0); PG(a-13:0/a-21:0); PG(a-13:0/i-21:0); PG(i-12:0/i-22:0);	HMDB0010572	HMDB0010600	HMDB0116640	HMDB0116651	HMDB0116670
529.3056__409.29	3.4248	1.776	0.001168	2.9326	1.64006	Kukoamine A; (S)-Nerolidol 3-O-[a-L-rhamnopyranosyl-(1->2)-b-D-glucopyranoside]; Kukoamine B; Kukoamine C; Kukoamine D;	HMDB0030392	HMDB0040844	HMDB0060525	HMDB0060526	HMDB0060527
155.1431__223.43	3.4201	1.774	0.0084796	2.0716	1.4373	Menthol; Decanal; (E)-3-decen-1-ol; 2-Decanone; cis-4-Decenol;	HMDB0003352	HMDB0011623	HMDB0013810	HMDB0031409	HMDB0032206
431.9807__378.18	3.2379	1.6951	0.0083568	2.078	1.43986	Quinoline yellow;	HMDB0037615
268.0983__397.64	3.2314	1.6922	0.00096109	3.0172	1.64931	Moclobemide;	HMDB0015302
144.0444__175.43	3.1848	1.6712	0.083775	1.0769	1.02185	Indole-3-carboxaldehyde;	HMDB0029737
783.5743__547.67	3.1641	1.6618	0.032745	1.4849	1.23446	PC(14:1(9Z)/22:2(13Z,16Z)); PC(16:0/20:3(5Z,8Z,11Z)); PC(16:0/20:3(8Z,11Z,14Z)); PC(16:1(9Z)/20:2(11Z,14Z)); PC(18:0/18:3(6Z,9Z,12Z));	HMDB0007921	HMDB0007980	HMDB0007981	HMDB0008012	HMDB0008040
256.0941__129.89	3.1418	1.6516	0.047602	1.3224	1.16825	Glycerophosphocholine; 5-Methylcytidine; Pyro-L-glutaminyl-L-glutamine; 3-Methylcytidine;	HMDB0000086	HMDB0000982	HMDB0039229	HMDB0240577
884.5393__520.68	3.0142	1.5918	0.0050261	2.2988	1.51799	PS(22:4(7Z,10Z,13Z,16Z)/22:5(4Z,7Z,10Z,13Z,16Z)); PS(22:4(7Z,10Z,13Z,16Z)/22:5(7Z,10Z,13Z,16Z,19Z)); PS(22:5(4Z,7Z,10Z,13Z,16Z)/22:4(7Z,10Z,13Z,16Z)); PS(22:5(7Z,10Z,13Z,16Z,19Z)/22:4(7Z,10Z,13Z,16Z));	HMDB0112811	HMDB0112812	HMDB0112834	HMDB0112859
389.12__389.6	2.9729	1.5719	0.02191	1.6594	1.32275	trans-Piceid; (Z)-Resveratrol 4'-glucoside; cis-Piceid; (E)-2-Glucosyl-3,4',5-trihydroxystilbene; 3,4,5-trihydroxy-6-(2-hydroxy-1,2-diphenylethoxy)oxane-2-carboxylic acid;	HMDB0030564	HMDB0030565	HMDB0031422	HMDB0036294	HMDB0135201
883.5358__515.62	2.928	1.5499	0.027633	1.5586	1.28831	PI(16:0/22:5(4Z,7Z,10Z,13Z,16Z)); PI(16:0/22:5(7Z,10Z,13Z,16Z,19Z)); PI(16:2(9Z,12Z)/22:3(10Z,13Z,16Z)); PI(18:1(11Z)/20:4(5Z,8Z,11Z,14Z)); PI(18:1(11Z)/20:4(8Z,11Z,14Z,17Z));	HMDB0009795	HMDB0009796	HMDB0009804	HMDB0009832	HMDB0009833
356.1872__458.22	2.8832	1.5277	0.019757	1.7043	1.30253	Xanthoplanine;	HMDB0033356
503.2983__392.9	2.8809	1.5265	0.0021986	2.6579	1.59418	Desglucocoroloside;	HMDB0033709
407.2805__328.5	2.8329	1.5023	0.081906	1.0867	1.03351	3alpha,7alpha,12beta-Trihydroxy-5beta-cholanoic acid; 3a,4b,7a-Trihydroxy-5b-cholanoic acid; 1b,3a,12a-Trihydroxy-5b-cholanoic acid; 3a,4b,12a-Trihydroxy-5b-cholanoic acid; 3a,6a,7b-Trihydroxy-5b-cholanoic acid;	HMDB0000312	HMDB0000320	HMDB0000326	HMDB0000330	HMDB0000364
405.2651__307.38	2.8329	1.5023	0.00065868	3.1813	1.67595	7-Ketodeoxycholic acid; 3,7-Dihydroxy-12-oxocholanoic acid; 3-Oxocholic acid; Annocherin A; (6b,7b,13R)-6,7-Diacetoxy-8,14-labdadiene-13-ol;	HMDB0000391	HMDB0000400	HMDB0000502	HMDB0033399	HMDB0035288
270.0776__352.56	2.8242	1.4978	0.0014359	2.8429	1.62675	Koeniginequinone B; Pummeline; 4-hydroxy ketorolac;	HMDB0032109	HMDB0040382	HMDB0060647
549.269__197.46	2.7722	1.471	0.0031368	2.5035	1.53169	Desglucocheirotoxin;	HMDB0034362
939.4146__631.81	2.7712	1.4705	0.027457	1.5613	1.28204	Betavulgaroside VIII;	HMDB0034816
552.3107__402.84	2.7167	1.4419	0.0015197	2.8182	1.62181	LysoPE(0:0/24:6(6Z,9Z,12Z,15Z,18Z,21Z)); LysoPE(24:6(6Z,9Z,12Z,15Z,18Z,21Z)/0:0);	HMDB0011499	HMDB0011529
298.0723__383.98	2.708	1.4372	0.011361	1.9446	1.40667	Avenanthramide 1c; (Z)-N-Coumaroyl-5-hydroxyanthranilic acid; Marshdine; Avenanthramide G;	HMDB0029284	HMDB0038577	HMDB0041141	HMDB0041516
244.1378__296.8	2.7034	1.4347	0.00066935	3.1743	1.68082	S-3-oxodecanoyl cysteamine;	HMDB0059773
608.1132__291.31	2.6874	1.4262	0.030169	1.5204	1.24437	6-[(6-carboxy-3,4,5-trihydroxyoxan-2-yl)oxy]-7-(3,4-dihydroxy-5-methoxyphenyl)-11-hydroxy-3-(4-hydroxyphenyl)-2λ⁴,8-dioxatricyclo[7.3.1.0⁵,¹³]trideca-1(13),2,4,6,9,11-hexaen-2-ylium; 11-[(6-carboxy-3,4,5-trihydroxyoxan-2-yl)oxy]-7-(3,4-dihydroxy-5-methoxyphenyl)-6-hydroxy-3-(4-hydroxyphenyl)-2λ⁴,8-dioxatricyclo[7.3.1.0⁵,¹³]trideca-1(13),2,4,6,9,11-hexaen-2-ylium; (6-carboxy-3,4,5-trihydroxyoxan-2…	HMDB0134846	HMDB0134847	HMDB0134848	HMDB0134849	HMDB0134850
289.145__356.89	2.6763	1.4202	0.0013574	2.8673	1.627	[6]-Dehydrogingerdione; Laurenobiolide; Oudemansin A; 3-Polyprenyl-4,5-dihydroxybenzoate; 2-(3,7-dimethylocta-2,6-dien-1-yl)-3,4-dihydroxybenzoic acid;	HMDB0029474	HMDB0036771	HMDB0039949	HMDB0060380	HMDB0134973
253.072__273.21	2.6735	1.4187	0.0012411	2.9062	1.63519	3-(6,7-dimethoxy-2H-1,3-benzodioxol-5-yl)-3-hydroxypropanal; 3-(6,7-dimethoxy-2H-1,3-benzodioxol-5-yl)propanoic acid; 3-(6,7-dimethoxy-2H-1,3-benzodioxol-5-yl)-2-hydroxypropanal; [3-(6,7-dimethoxy-2H-1,3-benzodioxol-5-yl)oxiran-2-yl]methanol; 3-(4,7-dimethoxy-2H-1,3-benzodioxol-5-yl)propanoic acid;	HMDB0128666	HMDB0128669	HMDB0128671	HMDB0128675	HMDB0137285
453.2863__329.11	2.6226	1.391	0.0012632	2.8985	1.63618	LysoPE(0:0/16:0); LysoPE(16:0/0:0); Sambutoxin; 3alpha,7alpha,12beta-Trihydroxy-5beta-cholanoic acid; 3a,4b,7a-Trihydroxy-5b-cholanoic acid; 1b,3a,12a-Trihydroxy-5b-cholanoic acid; 3a,4b,12a-Trihydroxy-5b-cholanoic acid; 3a,6a,7b-Trihydroxy-5b-cholanoic acid;	HMDB0011473	HMDB0011503	HMDB0041085	HMDB0000312	HMDB0000320	HMDB0000326	HMDB0000330	HMDB0000364
488.1336__408.59	2.6184	1.3887	0.025428	1.5947	1.28414	4-Hydroxy duloxetine glucuronide;	HMDB0060763
698.5581__547.67	2.5418	1.3458	0.020765	1.6827	1.3058	GlcCer(d18:1/16:0); Galactosylceramide (d18:1/16:0);	HMDB0004971	HMDB0010708
744.5601__547.62	2.5248	1.3362	0.0054263	2.2655	1.47719	GlcCer(d18:1/16:0); Galactosylceramide (d18:1/16:0);	HMDB0004971	HMDB0010708
443.3494__400.09	2.4877	1.3148	0.027149	1.5662	1.26229	3-beta-Hydroxy-4-beta-methyl-5-alpha-cholest-7-ene-4-alpha-carboxylate; 4alpha-Carboxy-4beta-methyl-5alpha-cholesta-8-en-3beta-ol; (3beta,5alpha,6beta,22E,24R)-23-Methylergosta-7,22-diene-3,5,6-triol; Schleicherastatin 5; 4α-carboxy-4β-methyl-5α-cholesta-8-en-3β-ol;	HMDB0011662	HMDB0012165	HMDB0033633	HMDB0035804	HMDB0062384
125.0959__149.24	2.4817	1.3113	0.051848	1.2853	1.15177	(E)-2-octenal; 2-Octenal; (3xi,5Z)-1,5-Octadien-3-ol; 2,4,4-Trimethylcyclopentanone; 2-Octen-4-one;	HMDB0013809	HMDB0030961	HMDB0030966	HMDB0031197	HMDB0031301
336.1279__65.15	2.4654	1.3018	0.016902	1.7721	1.36456	4-O-alpha-D-Galactopyranosylcalystegine B2;	HMDB0038228
371.317__463.99	2.4122	1.2704	0.044039	1.3562	1.19773	MG(19:0/0:0/0:0); MG(0:0/19:0/0:0); MG(0:0/i-19:0/0:0); MG(i-19:0/0:0/0:0);	HMDB0072839	HMDB0072840	HMDB0072876	HMDB0072881
176.0379__72.24	2.4064	1.2669	0.0024523	2.6104	1.57046	N-Formyl-L-methionine; Cycloalliin; Isoalliin; (R)C(S)S-Alliin; N-Acetyl-S-methylcysteine;	HMDB0001015	HMDB0029417	HMDB0029441	HMDB0033592	HMDB0240544
473.1989__270.57	2.3982	1.262	0.024276	1.6148	1.31368	Sildenafil;	HMDB0005039
721.5038__628.12	2.3964	1.2608	0.045525	1.3417	1.20859	PG(16:0/16:0); PG(a-13:0/i-19:0); PG(i-12:0/i-20:0); PG(i-13:0/i-19:0);	HMDB0010570	HMDB0116649	HMDB0116668	HMDB0116685
289.0018__142.86	2.378	1.2497	0.032624	1.4865	1.23495	3-[3-methoxy-4-(sulfooxy)phenyl]-2-oxopropanoic acid; 3-[3-hydroxy-5-methoxy-4-(sulfooxy)phenyl]prop-2-enoic acid; 3-[3-methoxy-4-(sulfooxy)phenyl]oxirane-2-carboxylic acid;	HMDB0126595	HMDB0127966	HMDB0127977
154.0613__30.23	2.3507	1.2331	0.064883	1.1879	1.09778	L-Histidine; L-2-Amino-3-(1-pyrazolyl)propanoic acid;	HMDB0000177	HMDB0034267
734.5363__547.23	2.3321	1.2216	0.049525	1.3052	1.14919	GlcCer(d18:1/16:0); Galactosylceramide (d18:1/16:0);	HMDB0004971	HMDB0010708
833.6122__461.83	2.3045	1.2045	0.037472	1.4263	1.21801	PA(22:4(7Z,10Z,13Z,16Z)/24:1(15Z)); PA(22:5(4Z,7Z,10Z,13Z,16Z)/24:0); PA(22:5(7Z,10Z,13Z,16Z,19Z)/24:0); PA(24:0/22:5(4Z,7Z,10Z,13Z,16Z)); PA(24:0/22:5(7Z,10Z,13Z,16Z,19Z));	HMDB0115348	HMDB0115374	HMDB0115399	HMDB0115450	HMDB0115451
543.2418__416.68	2.3039	1.2041	0.010444	1.9811	1.4034	Cinncassiol A 19-glucoside;	HMDB0035165
485.2735__630.78	2.269	1.1821	0.057442	1.2408	1.13587	Sarcodon scabrosus Depsipeptide;	HMDB0041421
315.1966__395.57	2.2452	1.1668	0.018763	1.7267	1.33077	2-Methoxyestradiol-3-methylether; 15-Deoxy-d-12,14-PGJ2; 6b-Hydroxymethandienone; 4-Hydroxyretinoic acid; all-trans-5,6-Epoxyretinoic acid;	HMDB0000344	HMDB0005079	HMDB0005832	HMDB0006254	HMDB0012451
176.0379__101.36	2.2141	1.1467	0.030504	1.5156	1.25822	N-Formyl-L-methionine; Cycloalliin; Isoalliin; (R)C(S)S-Alliin; N-Acetyl-S-methylcysteine;	HMDB0001015	HMDB0029417	HMDB0029441	HMDB0033592	HMDB0240544
201.1352__40.53	2.2067	1.1419	0.0038918	2.4098	1.52857	Asymmetric dimethylarginine; Symmetric dimethylarginine;	HMDB0001539	HMDB0003334
545.2578__309.78	2.1817	1.1255	0.011273	1.9479	1.40114	Canavalioside;	HMDB0036317
489.176__395.99	2.1469	1.1022	0.014182	1.8483	1.36737	3,4,5-trihydroxy-6-({2-[6-(2-methylbut-3-en-2-yl)-7-oxo-2H,3H,7H-furo[3,2-g]chromen-2-yl]propan-2-yl}oxy)oxane-2-carboxylic acid;	HMDB0130297
379.0828__37	2.0985	1.0694	0.075607	1.1214	1.03858	(7-hydroxy-5-methoxy-6,8-dimethyl-2-phenyl-3,4-dihydro-2H-1-benzopyran-4-yl)oxidanesulfonic acid;	HMDB0130655
211.0608__115.4	2.0916	1.0646	0.040889	1.3884	1.20416	Vanillactic acid; Danielone; Propyl gallate; Eudesmic acid; Valtrate;	HMDB0000913	HMDB0031704	HMDB0033835	HMDB0033839	HMDB0034493
196.061__293.83	2.0878	1.062	0.0018708	2.728	1.60345	L-Dopa; DL-Dopa; 2-Hydroxy-3-(3,4-dihydroxyphenyl)propanamide; N-Hydroxy-L-tyrosine;	HMDB0000181	HMDB0000609	HMDB0038336	HMDB0038750
248.1657__414.39	2.0111	1.008	0.0006968	3.1569	1.67297	Alprenolol; N,O-Didesmethylvenlafaxine; O-Desmethyltramadol; N-Desmethyltramadol;	HMDB0015004	HMDB0060852	HMDB0060997	HMDB0061007
611.156__416.55	2.0073	1.0052	0.00095238	3.0212	1.6604	Cyanidin 3-glucogalactoside; Cyanidin 3,3'-diglucoside; Cyanidin 3,4'-diglucoside; Cyanidin 3-laminaribioside; Delphinidin 3-rutinoside;	HMDB0031468	HMDB0037986	HMDB0037991	HMDB0037996	HMDB0038001
454.0523__313.03	0.49996	-1.0001	0.00019871	3.7018	1.7388	Cefotaxime;	HMDB0014636
297.0474__316.16	0.49914	-1.0025	0.0076317	2.1174	1.43996	L-Cysteinylglycine disulfide;	HMDB0000709
255.114__73.19	0.49431	-1.0165	0.061448	1.2115	1.09317	1-(9H-Pyrido[3,4-b]indol-1-yl)-1,4-butanediol;	HMDB0035193
493.1371__397.61	0.49186	-1.0237	0.0052517	2.2797	1.49771	4'-O-methyl-(-)-epicatechin-3'-O-beta-glucuronide; Pimentol; Dihydroprudomenin; 6-({3,5-dihydroxy-2-[3-hydroxy-4-(methoxymethyl)phenyl]-3,4-dihydro-2H-1-benzopyran-7-yl}oxy)-3,4,5-trihydroxyoxane-2-carboxylic acid; 3,4,5-trihydroxy-6-[2-(methoxymethyl)-5-(3,5,7-trihydroxy-3,4-dihydro-2H-1-benzopyran-2-yl)phenoxy]oxane-2-carboxylic acid;	HMDB0029180	HMDB0035442	HMDB0039357	HMDB0127851	HMDB0127852
580.4956__618.91	0.48428	-1.0461	0.023101	1.6364	1.26485	N-[(4E,8E)-1,3-dihydroxyoctadeca-4,8-dien-2-yl]hexadecanamide; Cer(d18:2(4E,14Z)/16:0);	HMDB0035480	HMDB0240686
209.0287__68.03	0.47594	-1.0711	0.032241	1.4916	1.25753	Galactaric acid; Glucaric acid;	HMDB0000639	HMDB0000663
359.154__524.49	0.47528	-1.0732	4.6483e-07	6.3327	1.92269	Lepidine C; Lepidine;	HMDB0032717	HMDB0033437
213.1493__369.48	0.47432	-1.0761	0.0015583	2.8073	1.60974	3-Oxododecanoic acid; 4-Acetoxy-2-hexyltetrahydrofuran;	HMDB0010727	HMDB0037398
291.1605__275.84	0.47152	-1.0846	0.052019	1.2838	1.14209	9-Acetoxyfukinanolide; Isotrichodermin; (3beta,6beta)-Furanoeremophilane-3,6-diol 6-acetate; Acetylvalerenolic acid; Acetylbalchanolide;	HMDB0034658	HMDB0034738	HMDB0034930	HMDB0035687	HMDB0036693
159.0848__157.85	0.46894	-1.0925	0.06614	1.1795	1.06002	2-Methyl-4-propyl-1,3-oxathiane; (+/-)-3-(Methylthio)heptanal;	HMDB0031572	HMDB0032426
804.5773__511.57	0.46635	-1.1005	0.022716	1.6437	1.30215	PS(15:0/22:0); PS(22:0/15:0);	HMDB0112334	HMDB0112709
301.0358__267.86	0.46574	-1.1024	0.0021033	2.6771	1.57838	Quercetin; Tricetin; Morin; 2',4',5,7,8-Pentahydroxyisoflavone; 6-Hydroxyluteolin;	HMDB0005794	HMDB0029620	HMDB0030796	HMDB0033264	HMDB0036632
623.2011__291.16	0.46543	-1.1034	0.013859	1.8583	1.36421	Acteoside; Isoacteoside;	HMDB0034843	HMDB0041025
167.0192__168	0.46508	-1.1045	0.025874	1.5871	1.24933	Uric acid;	HMDB0000289
416.1791__51.59	0.4638	-1.1084	0.055329	1.257	1.1091	(E)-Casimiroedine;	HMDB0030274
571.2896__372.16	0.46334	-1.1099	7.2623e-06	5.1389	1.87019	Kinetensin 4-7;	HMDB0012986
293.0705__284.41	0.46168	-1.115	0.00012426	3.9057	1.78374	Sulfacytine;	HMDB0015412
271.2282__478.47	0.45935	-1.1223	0.0033244	2.4783	1.55349	16-Hydroxy hexadecanoic acid; (R)-3-Hydroxy-hexadecanoic acid; 2-Hydroxyhexadecanoic acid; 3-Hydroxyhexadecanoic acid; 5-Hydroxyhexadecanoic acid;	HMDB0006294	HMDB0010734	HMDB0031057	HMDB0061658	HMDB0112184
433.2595__487.69	0.45739	-1.1285	7.7883e-08	7.1086	1.93771	(12S,15S)-15-O-Demethyl-10,29-dideoxy-11,12-dihydro-striatin C; Erinacine C;	HMDB0033030	HMDB0040389
555.2737__380.96	0.45659	-1.131	9.4389e-08	7.0251	1.94338	Enkephalin L;	HMDB0001045
297.1346__236.03	0.45391	-1.1395	0.00030037	3.5223	1.70866	Toxin T2 tetrol; 3,7,8,15-Scirpenetetrol;	HMDB0036159	HMDB0037560
830.5931__510.29	0.445	-1.1681	0.022624	1.6454	1.28138	PS(15:0/24:1(15Z)); PS(24:1(15Z)/15:0);	HMDB0112341	HMDB0112912
213.1857__458.1	0.44306	-1.1744	0.00088191	3.0546	1.65585	Tridecanoic acid; Ethyl undecanoate; Methyl dodecanoate; Decanal propyleneglycol acetal; Octyl 3-methylbutanoate;	HMDB0000910	HMDB0029552	HMDB0031018	HMDB0032211	HMDB0034140
362.0513__39.72	0.44264	-1.1758	0.009066	2.0426	1.40249	2-O-Galloylgalactaric acid; 6-(6-carboxy-2,3,4-trihydroxyphenoxy)-3,4,5-trihydroxyoxane-2-carboxylic acid; 6-(4-carboxy-2,3,6-trihydroxyphenoxy)-3,4,5-trihydroxyoxane-2-carboxylic acid; 6-(3-carboxy-2,5,6-trihydroxyphenoxy)-3,4,5-trihydroxyoxane-2-carboxylic acid; 6-(5-carboxy-2,3,4-trihydroxyphenoxy)-3,4,5-trihydroxyoxane-2-carboxylic acid;	HMDB0036932	HMDB0126649	HMDB0126650	HMDB0126651	HMDB0126652
493.2597__278.49	0.4391	-1.1874	2.0597e-07	6.6862	1.93668	Imatinib;	HMDB0014757
230.0128__196.63	0.43373	-1.2051	0.011161	1.9523	1.38992	Paracetamol sulfate; Benzeneacetamide-4-O-sulphate; HPAA sulfate;	HMDB0059911	HMDB0059994	HMDB0240381
220.0973__315.99	0.43315	-1.2071	0.021432	1.6689	1.28778	Metaxalone; Carbofuran; Hydrocotarnine;	HMDB0014798	HMDB0031770	HMDB0033701
457.237__389.52	0.43089	-1.2146	1.2552e-06	5.9013	1.91255	1-Lyso-2-arachidonoyl-phosphatidate; 1-(5Z,8Z,11Z,14Z-eicosatetraenoyl)-sn-glycero-3-phosphate; LysoPA(20:4(8Z,11Z,14Z,17Z)/0:0);	HMDB0012496	HMDB0062312	HMDB0114742
125.0959__175.72	0.42653	-1.2293	2.8403e-06	5.5466	1.89897	(E)-2-octenal; 2-Octenal; (3xi,5Z)-1,5-Octadien-3-ol; 2,4,4-Trimethylcyclopentanone; 2-Octen-4-one;	HMDB0013809	HMDB0030961	HMDB0030966	HMDB0031197	HMDB0031301
252.0735__269.72	0.42373	-1.2388	2.4205e-06	5.6161	1.88534	L-Threoneopterin; Neopterin; Umanopterin; Hydroxysepiapterin; D-erythro-Eritadenine;	HMDB0000727	HMDB0000845	HMDB0000877	HMDB0002109	HMDB0029895
237.0784__182.5	0.42333	-1.2401	1.645e-06	5.7838	1.91082	3,4,5-Trimethoxycinnamic acid; Trans-2, 3, 4-Trimethoxycinnamate; 1-(2,4,5-Trimethoxyphenyl)-1,2-propanedione; 3-(3,4,5-trimethoxyphenyl)prop-2-enoic acid; 3-(6,7-dimethoxy-2H-1,3-benzodioxol-5-yl)propanal;	HMDB0002511	HMDB0011721	HMDB0031771	HMDB0124869	HMDB0128658
235.1338__352.21	0.42131	-1.2471	0.0040906	2.3882	1.5044	Heptyl 4-hydroxybenzoate; Eremopetasidione;	HMDB0034462	HMDB0040778
151.0391__220.72	0.41973	-1.2525	2.6818e-05	4.5716	1.82281	p-Hydroxyphenylacetic acid; 3-Hydroxyphenylacetic acid; ortho-Hydroxyphenylacetic acid; Mandelic acid; p-Anisic acid;	HMDB0000020	HMDB0000440	HMDB0000669	HMDB0000703	HMDB0001101
293.1795__392.36	0.41875	-1.2558	0.021834	1.6609	1.3002	Sodium Tetradecyl Sulfate;	HMDB0014607
419.2116__275.47	0.41635	-1.2641	0.0043432	2.3622	1.51821	Levocabastine;	HMDB0015238
185.154__417.82	0.40837	-1.292	1.5592e-05	4.8071	1.83401	Undecanoic acid; 4,6-Dimethylnonanoic acid; Hexyl 3-methylbutanoate; 2-Hexyl-4,5-dimethyl-1,3-dioxolane; Octanal propyleneglycol acetal;	HMDB0000947	HMDB0002373	HMDB0032044	HMDB0032325	HMDB0032448
681.2973__499.14	0.40555	-1.302	0.0039441	2.404	1.49188	Neoacrimarine A;	HMDB0040384
327.1243__235.28	0.40288	-1.3116	0.096981	1.0133	1.00036	Acutilobin; 6-[(E)-2-(2,4-dihydroxyphenyl)ethenyl]-3-(3-methylbut-2-en-1-yl)benzene-1,2,4-triol; 2-[(E)-2-[3,5-dihydroxy-4-(3-methylbut-2-en-1-yl)phenyl]ethenyl]benzene-1,3,5-triol; 5-[(E)-2-[3,5-dihydroxy-4-(3-methylbut-2-en-1-yl)phenyl]ethenyl]benzene-1,2,4-triol; 4-[(E)-2-[3,5-dihydroxy-4-(3-methylbut-2-en-1-yl)phenyl]ethenyl]benzene-1,2,3-triol;	HMDB0040670	HMDB0125543	HMDB0125544	HMDB0125545	HMDB0125546
323.1866__281.38	0.39472	-1.3411	0.036404	1.4388	1.22645	Lactapiperanol D; Cibaric acid;	HMDB0033631	HMDB0038580
305.2489__519.77	0.37974	-1.3969	8.3286e-06	5.0794	1.86844	Dihomo-gamma-linolenic acid; 5,8,11-Eicosatrienoic acid; Sciadonic acid; Sagittariol; Dihomo-alpha-linolenic acid;	HMDB0002925	HMDB0010378	HMDB0031058	HMDB0036835	HMDB0060039
761.5984__622.41	0.37937	-1.3983	0.015267	1.8162	1.37164	PC(14:0/20:0); PC(16:0/18:0); PC(18:0/16:0); PC(20:0/14:0); PE(15:0/22:0);	HMDB0007878	HMDB0007970	HMDB0008034	HMDB0008262	HMDB0008907
195.9123__292.11	0.37661	-1.4089	3.3767e-05	4.4715	1.8236	3,5,6-Trichloro-2-pyridinol;	HMDB0039853
356.1163__106.15	0.36817	-1.4416	0.030556	1.5149	1.24578	Niazimicin;	HMDB0031944
317.2125__405.63	0.36795	-1.4424	0.0020181	2.6951	1.57386	Leukotriene A4; 5-HEPE; Oxymesterone; 12-HEPE; 14,15-EpETE;	HMDB0001337	HMDB0005081	HMDB0006027	HMDB0010202	HMDB0010205
407.2211__375.47	0.36574	-1.4511	0.00055246	3.2577	1.68913	cis-Methylbixin; trans-Methylbixin; Heterophylol; 1-palmitoyl-dihydroxyacetone-phosphate; 1-(9Z-hexadecenoyl)-glycero-3-phosphate;	HMDB0032021	HMDB0039078	HMDB0041126	HMDB0062190	HMDB0062323
220.0612__238.6	0.36489	-1.4545	0.0010516	2.9782	1.63346	Methyl 5-hydroxyoxindole-3-acetate; Methyl dioxindole-3-acetate;	HMDB0038990	HMDB0038991
547.1203__133.49	0.35899	-1.478	0.020578	1.6866	1.29535	Neobetanin;	HMDB0029405
317.1721__143.06	0.35352	-1.5001	0.01888	1.724	1.32201	Ubiquinone-2; Cohulupone; (1(10)E,4E,6a,9b)-9-(2-Methylpropanoyloxy)-1(10),4,11(13)-germacratrien-12,6-olide; Panaquinquecol 6; [8]-Dehydrogingerdione;	HMDB0006709	HMDB0030064	HMDB0031373	HMDB0035500	HMDB0039277
357.2398__231.68	0.34861	-1.5203	6.0603e-08	7.2175	1.94472	24,25,26,27-Tetranor-23-oxo-hydroxyvitamin D3;	HMDB0060114
366.0224__93.53	0.33565	-1.575	0.014689	1.833	1.35796	5'-Hydroxymethyl meloxicam;	HMDB0060780
255.1394__407.77	0.33297	-1.5866	0.0011938	2.9231	1.63337	Falcarindione;	HMDB0033680
766.5416__443.58	0.33004	-1.5993	0.096863	1.0138	1.00914	PC(15:0/20:4(5Z,8Z,11Z,14Z)); PC(15:0/20:4(8Z,11Z,14Z,17Z)); PC(20:4(5Z,8Z,11Z,14Z)/15:0); PC(20:4(8Z,11Z,14Z,17Z)/15:0); PE(16:0/22:4(7Z,10Z,13Z,16Z));	HMDB0007949	HMDB0007950	HMDB0008428	HMDB0008461	HMDB0008943
597.3056__382.6	0.3271	-1.6122	1.7072e-09	8.7677	1.97139	LysoPI(18:1(9Z)/0:0);	HMDB0061693
214.0273__64.51	0.32705	-1.6124	0.0079772	2.0981	1.42587	3-Chlorotyrosine;	HMDB0001885
477.3256__517.91	0.32072	-1.6406	2.8994e-07	6.5377	1.93306	Dolicholide; Polyporusterone A;	HMDB0034086	HMDB0038495
465.2281__254.91	0.31946	-1.6463	3.7904e-06	5.4213	1.87176	Dolichyl b-D-glucosyl phosphate;	HMDB0001054
400.982__257.85	0.31751	-1.6551	0.00061772	3.2092	1.68378	3-[3,5-dihydroxy-4-(sulfooxy)benzoyloxy]-4,5-dihydroxybenzoic acid; 3-hydroxy-4-(sulfooxy)-5-(3,4,5-trihydroxybenzoyloxy)benzoic acid;	HMDB0128331	HMDB0128332
383.1904__326.2	0.31562	-1.6637	0.00061851	3.2087	1.67721	Bortezomib;	HMDB0014334
491.3415__523.48	0.31235	-1.6788	0.073199	1.1355	1.05371	Homodolicholide;	HMDB0033907
279.2331__503.68	0.31199	-1.6804	6.5868e-06	5.1813	1.86668	Linoleic acid; Bovinic acid; (9E,11E)-Octadecadienoic acid; (10E,12Z)-Octadecadienoic acid; Linoelaidic acid;	HMDB0000673	HMDB0003797	HMDB0005047	HMDB0005048	HMDB0006270
207.0812__279.17	0.31122	-1.684	2.6032e-05	4.5845	1.81671	Chalcone; 1-Methoxyphenanthrene; 1,3-diphenylprop-2-en-1-one;	HMDB0003066	HMDB0060323	HMDB0135598
295.1554__358.57	0.30246	-1.7252	0.046559	1.332	1.17917	Ovalicin; Methyl dihydrophaseate; 3,8-Dihydroxy-6-methoxy-7(11)-eremophilen-12,8-olide;	HMDB0038120	HMDB0039376	HMDB0041551
437.1969__232.48	0.30241	-1.7254	0.0018067	2.7431	1.62232	1-Hydroxy-3,6,7-trimethoxy-2,8-diprenylxanthone; Kanzonol G; 5,7-dihydroxy-3-[3-hydroxy-4-methoxy-5-(3-methylbut-2-en-1-yl)phenyl]-8-(3-methylbut-2-en-1-yl)-3,4-dihydro-2H-1-benzopyran-4-one;	HMDB0036597	HMDB0040613	HMDB0134749
716.525__511.21	0.29887	-1.7424	0.0018633	2.7297	1.58032	PC(15:0/16:1(9Z)); PC(16:1(9Z)/15:0); PE(14:0/20:1(11Z)); PE(14:1(9Z)/20:0); PE(16:0/18:1(11Z));	HMDB0007936	HMDB0008000	HMDB0008834	HMDB0008866	HMDB0008926
121.101__267.64	0.2978	-1.7476	0.00039661	3.4016	1.70461	Santene; 3-Allyl-1-cyclohexene;	HMDB0038140	HMDB0061784
173.017__326.96	0.29659	-1.7534	0.00047011	3.3278	1.69509	Brassilexin;	HMDB0039638
344.1098__63.65	0.29588	-1.7569	0.065309	1.185	1.12207	Isofenphos;	HMDB0031796
289.1312__206.8	0.29238	-1.7741	0.0003551	3.4497	1.72318	Trimethoprim; Benomyl; Ribalinium; Rutalinium;	HMDB0014583	HMDB0031767	HMDB0033346	HMDB0033348
287.1868__421.62	0.29103	-1.7808	0.00033363	3.4767	1.71793	6-Hydroxypentadecanedioic acid;	HMDB0031885
478.2945__408.75	0.29086	-1.7816	4.8398e-06	5.3152	1.88258	LysoPE(0:0/18:1(11Z)); LysoPE(0:0/18:1(9Z)); LysoPE(18:1(11Z)/0:0); LysoPE(18:1(9Z)/0:0);	HMDB0011475	HMDB0011476	HMDB0011505	HMDB0011506
199.1332__341.25	0.28905	-1.7906	0.00057637	3.2393	1.65425	(S)-9-Hydroxy-10-undecenoic acid; Clarycet; 3-Nonanon-1-yl acetate;	HMDB0032662	HMDB0036029	HMDB0037179
297.1136__270.46	0.28688	-1.8015	0.00013098	3.8828	1.77927	7C-aglycone; Enterolactone; (+)-Ligballinol; 7-Hydroxy-5-methoxy-6,8-dimethylflavanone; 1-(2,4-Dihydroxy-6-methoxy-3,5-dimethylphenyl)-3-phenyl-2-propen-1-one;	HMDB0004808	HMDB0006101	HMDB0029543	HMDB0030695	HMDB0037376
388.1185__36.93	0.28648	-1.8035	0.015162	1.8192	1.38312	xi-8-Acetonyldihydrosanguinarine;	HMDB0039896
495.1178__82.13	0.28194	-1.8265	0.01065	1.9726	1.38889	1-Nitro-5-glutathionyl-6-hydroxy-5,6-dihydronaphthalene; 1-Nitro-5-hydroxy-6-glutathionyl-5,6-dihydronaphthalene; 1-Nitro-7-glutathionyl-8-hydroxy-7,8-dihydronaphthalene; 1-Nitro-7-hydroxy-8-glutathionyl-7,8-dihydronaphthalene;	HMDB0060326	HMDB0060327	HMDB0060329	HMDB0060330
340.2495__340.92	0.27667	-1.8538	0.00028201	3.5497	1.7354	trans-2-Dodecenoylcarnitine;	HMDB0013326
803.5652__489.51	0.2754	-1.8604	0.031743	1.4984	1.20898	PA(20:5(5Z,8Z,11Z,14Z,17Z)/24:1(15Z)); PA(22:0/22:6(4Z,7Z,10Z,13Z,16Z,19Z)); PA(22:1(13Z)/22:5(4Z,7Z,10Z,13Z,16Z)); PA(22:1(13Z)/22:5(7Z,10Z,13Z,16Z,19Z)); PA(22:2(13Z,16Z)/22:4(7Z,10Z,13Z,16Z));	HMDB0115223	HMDB0115266	HMDB0115291	HMDB0115292	HMDB0115317
340.0355__263.71	0.26714	-1.9043	0.00022223	3.6532	1.75258	7-Chloro-6-demethylcepharadione B;	HMDB0039757
268.0476__270.23	0.26408	-1.921	1.4948e-05	4.8254	1.83867	2-{[hydroxy(6-hydroxy-7-methoxy-2H-1,3-benzodioxol-5-yl)methylidene]amino}acetic acid; 2-{[hydroxy(7-hydroxy-6-methoxy-2H-1,3-benzodioxol-5-yl)methylidene]amino}acetic acid;	HMDB0128732	HMDB0128737
237.0772__266.76	0.26116	-1.937	0.081382	1.0895	1.04295	3,4,5-Trimethoxycinnamic acid; Trans-2, 3, 4-Trimethoxycinnamate; 1-(2,4,5-Trimethoxyphenyl)-1,2-propanedione; 3-(3,4,5-trimethoxyphenyl)prop-2-enoic acid; 3-(6,7-dimethoxy-2H-1,3-benzodioxol-5-yl)propanal;	HMDB0002511	HMDB0011721	HMDB0031771	HMDB0124869	HMDB0128658
351.0693__136.82	0.26046	-1.9409	0.075567	1.1217	1.08435	7-Hydroxymethyl-12-methylbenz[a]anthracene sulfate;	HMDB0060420
469.3652__344.31	0.25805	-1.9543	0.0014718	2.8322	1.62053	Momoridcin; Ambolic acid;	HMDB0030512	HMDB0035713
280.0784__271.3	0.25539	-1.9692	0.00013218	3.8788	1.76988	albendazole S-oxide; Albendazole sulfoxide;	HMDB0059609	HMDB0060560
227.165__383.12	0.25528	-1.9698	3.3092e-05	4.4803	1.83392	11-Hydroxy-9-tridecenoic acid; Menthone 1,2-glyceryl ketal; Menthyl lactate; Menthone 1,3-glyceryl ketal;	HMDB0035881	HMDB0036139	HMDB0037212	HMDB0040004
387.1055__213.13	0.25027	-1.9984	0.00027411	3.5621	1.73933	5-Hydroxy-3,3',4',7,8-pentamethoxyflavone; 3'-Hydroxy-4',5,6,7,8-pentamethoxyflavone; 4'-Hydroxy-3',5,6,7,8-pentamethoxyflavone; 2'-Hydroxy-3,4',5',7,8-pentamethoxyflavone; Artemetin;	HMDB0029227	HMDB0029545	HMDB0029547	HMDB0029979	HMDB0030095
105.0697__267.61	0.24614	-2.0224	0.00037123	3.4304	1.69857	m-Xylene; o-Xylene; Ethylbenzene; p-Xylene;	HMDB0059810	HMDB0059851	HMDB0059905	HMDB0059924
481.2368__388.61	0.24368	-2.037	1.8228e-08	7.7393	1.96319	1-(4Z,7Z,10Z,13Z,16Z,19Z-docosahexaenoyl)-glycero-3-phosphate; LysoPA(22:6(4Z,7Z,10Z,13Z,16Z,19Z)/0:0);	HMDB0062307	HMDB0114755
766.5408__525.15	0.24173	-2.0485	0.00079451	3.0999	1.65619	PC(15:0/20:4(5Z,8Z,11Z,14Z)); PC(15:0/20:4(8Z,11Z,14Z,17Z)); PC(20:4(5Z,8Z,11Z,14Z)/15:0); PC(20:4(8Z,11Z,14Z,17Z)/15:0); PE(16:0/22:4(7Z,10Z,13Z,16Z));	HMDB0007949	HMDB0007950	HMDB0008428	HMDB0008461	HMDB0008943
283.2645__565.37	0.24015	-2.058	0.0019882	2.7015	1.58727	Stearic acid; Ethyl hexadecanoate; 16-Methylheptadecanoic acid; Hexyl dodecanoate;	HMDB0000827	HMDB0029811	HMDB0031066	HMDB0061946
330.0613__100.78	0.23859	-2.0674	0.0028085	2.5515	1.54254	Deoxyadenosine monophosphate;	HMDB0000905
301.0061__209.08	0.23704	-2.0768	1.4091e-05	4.8511	1.84854	Ethacrynic acid;	HMDB0015039
381.1743__530.25	0.23	-2.1203	0.0001941	3.712	1.73752	1,2,10-Trihydroxydihydro-trans-linalyl oxide 7-O-beta-D-glucopyranoside;	HMDB0033237
435.1702__486.8	0.21178	-2.2394	0.00053661	3.2703	1.66913	Flupenthixol;	HMDB0015013
181.0499__259.95	0.20865	-2.2608	8.6074e-05	4.0651	1.78424	Homovanillic acid; Isohomovanillic acid; 3,4-Dihydroxyhydrocinnamic acid; Hydroxyphenyllactic acid; 3-(3-Hydroxyphenyl)-3-hydroxypropanoic acid;	HMDB0000118	HMDB0000333	HMDB0000423	HMDB0000755	HMDB0002643
319.2281__421.01	0.207	-2.2723	0.000879	3.056	1.64676	5,6-Epoxy-8,11,14-eicosatrienoic acid; 8,9-Epoxyeicosatrienoic acid; 14R,15S-EpETrE; 15-HETE; 14,15-Epoxy-5,8,11-eicosatrienoic acid;	HMDB0002190	HMDB0002232	HMDB0002283	HMDB0003876	HMDB0004264
150.0009__270.22	0.19755	-2.3397	9.2304e-06	5.0348	1.84682	1,2-Benzisothiazol-3(2H)-one; 4-Thiocyanatophenol;	HMDB0034413	HMDB0040578
197.0813__179.27	0.19595	-2.3514	0.0022131	2.655	1.5801	Guaifenesin; 5-(3E-Pentenyl)tetrahydro-2-oxo-3-furancarboxylic acid; 3-(4-Hydroxy-3-methoxyphenyl)-1,2-propanediol; (2E,4E)-2,7-Dimethyl-2,4-octadienedioic acid; 3,4-Methylene suberic acid;	HMDB0004998	HMDB0030991	HMDB0033093	HMDB0034099	HMDB0059768
334.9023__32.6	0.18836	-2.4084	0.080453	1.0945	1.05675	Selenocystine;	HMDB0004122
178.0867__323.65	0.18354	-2.4459	0.00010326	3.9861	1.78163	2(N)-Methyl-norsalsolinol; (R)-Salsolinol; alpha-Methylphenylalanine; N-methylphenylalanine; Maltoxazine;	HMDB0001189	HMDB0005199	HMDB0029223	HMDB0029224	HMDB0030372
128.0341__36.34	0.18187	-2.459	0.019963	1.6998	1.33976	Pyroglutamic acid; Pyrroline hydroxycarboxylic acid; N-Acryloylglycine; 1-Pyrroline-4-hydroxy-2-carboxylate; dimethadione;	HMDB0000267	HMDB0001369	HMDB0001843	HMDB0002234	HMDB0061093
171.1018__268.92	0.17823	-2.4882	2.3887e-09	8.6218	1.97085	Tetrahydrofurfuryl butyrate; cis-3-Hexenyl lactate; 3-Methylbutyl 3-oxobutanoate; Butyl levulinate; Butyl 3-hydroxy-2-methylidenebutanoate;	HMDB0036188	HMDB0036213	HMDB0036396	HMDB0040165	HMDB0040202
331.0584__91.14	0.17487	-2.5157	0.017243	1.7634	1.34721	Fluorescein;	HMDB0014831
569.272__247.87	0.17308	-2.5305	0.00011541	3.9378	1.76856	Ganoderic acid F;	HMDB0035988
277.0838__198.66	0.16302	-2.6169	0.00036252	3.4407	1.69149	Glutamylmethionine; Methionyl-Glutamate; gamma-Glutamylmethionine;	HMDB0028825	HMDB0028972	HMDB0034367
173.1175__256.79	0.15335	-2.7051	9.9912e-10	9.0004	1.97183	(±)-3-Hydroxynonanoic acid; 2,4,6-Triethyl-1,3,5-trioxane;	HMDB0031513	HMDB0034040
155.1069__333.01	0.1508	-2.7293	0.00025979	3.5854	1.73421	4-Hydroxynonenal; 2,4-Nonanedione; 2-Nonenoic acid; 6-Butyltetrahydro-2H-pyran-2-one; Dihydro-5-pentyl-2(3H)-furanone;	HMDB0004362	HMDB0031263	HMDB0031271	HMDB0031514	HMDB0031531
331.2647__522.49	0.14919	-2.7447	4.1e-08	7.3872	1.94978	Adrenic acid; 1-Hydroxy-1-phenyl-3-hexadecanone; 3-Hydroxy-1-phenyl-1-hexadecanone; 2-Methyl-5-(8-pentadecenyl)-1,3-benzenediol; Ethyl Arachidonate;	HMDB0002226	HMDB0035676	HMDB0035677	HMDB0038910	HMDB0062725
431.1224__37.54	0.14801	-2.7563	0.0013265	2.8773	1.60324	Apiosylglucosyl 4-hydroxybenzoate; Licoagroside B;	HMDB0035318	HMDB0036523
238.0506__273.65	0.14533	-2.7826	1.6482e-07	6.783	1.94005	Marcanine A;	HMDB0033757
185.0602__309.1	0.13591	-2.8793	0.057352	1.2415	1.13519	1-Naphthaleneacetic acid;	HMDB0032708
393.0468__164.14	0.13573	-2.8812	2.0479e-05	4.6887	1.8295	3,4,5-trihydroxy-6-({8-hydroxy-2-oxo-2H-furo[2,3-h]chromen-4-yl}oxy)oxane-2-carboxylic acid; 3,4,5-trihydroxy-6-({4-hydroxy-2-oxo-2H-furo[2,3-h]chromen-8-yl}oxy)oxane-2-carboxylic acid;	HMDB0135850	HMDB0135851
248.131__220.65	0.13266	-2.9142	2.8071e-06	5.5517	1.89452	2-Pentanamido-3-phenylpropanoic acid;	HMDB0094646
243.0806__151.37	0.12892	-2.9554	0.024804	1.6055	1.27056	Biotin;	HMDB0000030
417.2418__439.73	0.12696	-2.9776	7.5074e-09	8.1245	1.9608	CPA(18:1(11Z)/0:0); CPA(18:1(9Z)/0:0);	HMDB0007005	HMDB0007006
356.189__395.31	0.12364	-3.0158	8.7237e-05	4.0593	1.78391	Nalbuphine; (S)-Laudanosine; 5-hydroxypropafenone;	HMDB0014982	HMDB0030213	HMDB0060988
196.0246__169.05	0.12322	-3.0207	9.6064e-12	11.017	1.98569	3-Hydroxy-2-methylpyridine-4,5-dicarboxylate; 4-hydroxy-3-nitrophenylacetate;	HMDB0006955	HMDB0062403
774.541__526.49	0.12301	-3.0231	0.018338	1.7366	1.31907	PE(22:5(4Z,7Z,10Z,13Z,16Z)/P-18:1(11Z)); PE(22:5(4Z,7Z,10Z,13Z,16Z)/P-18:1(9Z)); PE(22:5(7Z,10Z,13Z,16Z,19Z)/P-18:1(11Z)); PE(22:5(7Z,10Z,13Z,16Z,19Z)/P-18:1(9Z)); PE(22:6(4Z,7Z,10Z,13Z,16Z,19Z)/P-18:0);	HMDB0009644	HMDB0009645	HMDB0009677	HMDB0009678	HMDB0009709
411.0098__258.41	0.11673	-3.0988	1.7436e-07	6.7586	1.94264	dIDP;	HMDB0003536
476.0938__100.22	0.11491	-3.1214	0.0012731	2.8951	1.6109	6-{[3,7-dihydroxy-2-(4-hydroxy-3-methoxyphenyl)-8aH-chromen-5-yl]oxy}-3,4,5-trihydroxyoxane-2-carboxylic acid; 6-{[3,5-dihydroxy-2-(4-hydroxy-3-methoxyphenyl)-5H-chromen-7-yl]oxy}-3,4,5-trihydroxyoxane-2-carboxylic acid; 3,4,5-trihydroxy-6-[2-methoxy-4-(3,5,7-trihydroxy-5H-chromen-2-yl)phenoxy]oxane-2-carboxylic acid; 3,4,5-trihydroxy-6-{[3,5,7-trihydroxy-2-(3-methoxyphenyl)-8aH-chromen-6-yl]oxy}…	HMDB0128119	HMDB0128120	HMDB0128121	HMDB0128144	HMDB0128145
265.0576__255.71	0.1015	-3.3005	0.00021445	3.6687	1.72895	Monoglyceride citrate; 3-oxo-3-[(3,4,5,6-tetrahydroxyoxan-2-yl)methoxy]propanoic acid;	HMDB0032437	HMDB0125085
211.17__459.15	0.10015	-3.3198	0.018239	1.739	1.3365	10-Undecenyl acetate; Methyl (E)-2-dodecenoate; Coniferan; (±)-(E)-3-Methyl-4-decen-1-yl acetate; Ethyl 10-undecenoate;	HMDB0031017	HMDB0031028	HMDB0031741	HMDB0032792	HMDB0034286
283.0688__74.14	0.091206	-3.4547	0.059126	1.2282	1.12178	Xanthosine;	HMDB0000299
328.0455__148.4	0.086874	-3.5249	0.0012615	2.8991	1.61995	Cyclic AMP; Adenosine 2',3'-cyclic phosphate; Mecarbam;	HMDB0000058	HMDB0011616	HMDB0031800
415.2261__411.01	0.079151	-3.6592	1.2244e-06	5.9121	1.90678	CPA(18:2(9Z,12Z)/0:0);	HMDB0007007
206.0818__306.48	0.078023	-3.68	5.1227e-09	8.2905	1.96418	N-Acetyl-L-phenylalanine; Phenylpropionylglycine; 3-Phenylpropionylglycine; N-isopropylterephthalamic acid; 2-Acetamido-4-methylphenyl acetate;	HMDB0000512	HMDB0000860	HMDB0002042	HMDB0060608	HMDB0061682
135.0315__116.86	0.074298	-3.7505	0.06768	1.1695	1.10496	Hypoxanthine; Allopurinol; 1-Pentanesulfenothioic acid; Ethyl propyl disulfide; Ethyl isopropyl disulfide;	HMDB0000157	HMDB0014581	HMDB0031160	HMDB0033053	HMDB0033054
389.1215__183.91	0.073772	-3.7608	0.00043098	3.3655	1.69422	trans-Piceid; (Z)-Resveratrol 4'-glucoside; cis-Piceid; (E)-2-Glucosyl-3,4',5-trihydroxystilbene; 3,4,5-trihydroxy-6-(2-hydroxy-1,2-diphenylethoxy)oxane-2-carboxylic acid;	HMDB0030564	HMDB0030565	HMDB0031422	HMDB0036294	HMDB0135201
327.0641__74.25	0.063397	-3.9794	0.044072	1.3558	1.1836	6-Sulfatoxymelatonin;	HMDB0041815
595.2901__361.67	0.061725	-4.018	4.8721e-10	9.3123	1.97536	LysoPI(18:2(9Z,12Z)/0:0);	HMDB0240597
219.0659__270.52	0.056866	-4.1363	4.9682e-07	6.3038	1.91384	Eugenitin; Isoeugenitin; Hispolone;	HMDB0029467	HMDB0029473	HMDB0041442
235.0826__264.14	0.055843	-4.1625	2.2639e-08	7.6451	1.95065	Didanosine;	HMDB0015037
129.0909__298.22	0.055266	-4.1775	1.9169e-08	7.7174	1.95496	Heptanoic acid; Ethyl isovalerate; Butyl propionate; Isopentyl acetate; 2-Methylhexanoic acid;	HMDB0000666	HMDB0030028	HMDB0030052	HMDB0031528	HMDB0031594
396.146__382.61	0.051607	-4.2763	0.001048	2.9797	1.63151	Simulansamide;	HMDB0030435
569.2739__351.22	0.051151	-4.2891	4.4325e-06	5.3534	1.89317	Ganoderic acid F;	HMDB0035988
339.1986__373.94	0.04713	-4.4072	0.010604	1.9745	1.42089	Canrenone; Piperochromenoic acid;	HMDB0003033	HMDB0040635
293.0518__48.45	0.045772	-4.4494	0.097149	1.0126	1.01939	3,4,5-trihydroxy-6-[(3-methoxy-3-oxopropanoyl)oxy]oxane-2-carboxylic acid; 6-(1-carboxy-2-methoxy-2-oxoethyl)-3,4,5-trihydroxyoxane-2-carboxylic acid;	HMDB0130026	HMDB0130027
268.1556__213.45	0.044537	-4.4888	5.9014e-11	10.229	1.98773	Rizatriptan;	HMDB0015088
401.0801__159.56	0.044328	-4.4956	0.00084159	3.0749	1.64618	4'-Phosphopantothenoylcysteine; 13-chloro-5,14-dihydroxy-7,12-dimethyl-6-(3-methylbut-2-en-1-yl)-10-oxo-2,9-dioxatricyclo[9.4.0.0³,⁸]pentadeca-1(15),3(8),4,6,11,13-hexaene-15-carbaldehyde;	HMDB0001117	HMDB0139187
600.1975__181.93	0.043046	-4.538	2.7745e-09	8.5568	1.97267	2-(1-{[(1-{3-[(E)-2-(7-chloroquinolin-2-yl)ethenyl]phenyl}-3-hydroxy-3-[2-(2-hydroxypropan-2-yl)phenyl]propyl)sulfanyl]methyl}cyclopropyl)acetic acid; 2-{1-[(1-{3-[(E)-2-(7-chloroquinolin-2-yl)ethenyl]phenyl}-3-[2-(2-hydroxypropan-2-yl)phenyl]propanesulfinyl)methyl]cyclopropyl}acetic acid; 2-(1-{[(1-{3-[3-(7-chloroquinolin-2-yl)oxiran-2-yl]phenyl}-3-[2-(2-hydroxypropan-2-yl)phenyl]propyl)sulfanyl…	HMDB0143558	HMDB0143563	HMDB0143564	HMDB0143567
400.1658__383.25	0.033201	-4.9126	2.3365e-07	6.6314	1.9319	Moxifloxacin;	HMDB0014363
302.1613__166.85	0.028475	-5.1342	0.0007419	3.1297	1.65068	Pimelylcarnitine; 3-Methyladipoylcarnitine;	HMDB0013328	HMDB0240666
423.3276__577.88	0.026262	-5.2509	5.7257e-06	5.2422	1.86934	alpha-Tocotrienol; (22E,24R)-Stigmasta-4,22-diene-3,6-dione;	HMDB0006327	HMDB0038656
288.1277__205.44	0.025416	-5.2981	0.00047379	3.3244	1.68389	Chloropyramine;	HMDB0015690
245.1396__344.72	0.025077	-5.3175	9.4103e-09	8.0264	1.96061	3-Hydroxydodecanedioic acid; Dibutyl malate;	HMDB0000413	HMDB0031696
416.1382__383.03	0.022899	-5.4486	1.1168e-07	6.952	1.94397	N-Acetyl gemifloxacin;	HMDB0060633
115.0752__240.56	0.021541	-5.5368	3.6438e-08	7.4384	1.94683	Caproic acid; Isocaproic acid; Methyl (S)-2-Methylbutanoate; Methyl 3-methylbutanoate; Isopropyl propionate;	HMDB0000535	HMDB0000689	HMDB0029762	HMDB0030027	HMDB0030056
400.0746__382.81	0.018953	-5.7214	3.0677e-08	7.5132	1.94807	5-Hexenyl glucosinolate;	HMDB0038416

## Sheet: POS_Control_vs_STZ
ID	FC	log2(FC)	raw.pval	#NAME?	VIP	Compound	HMDBID
786.602__491.6	15.459	3.9504	0.030258	1.5192	1.90446	PC(18:1(9Z)/18:1(9Z)); PC(14:0/22:2(13Z,16Z)); PC(14:1(9Z)/22:1(13Z)); PC(16:0/20:2(11Z,14Z)); PC(16:1(9Z)/20:1(11Z));	HMDB0000593	HMDB0007888	HMDB0007920	HMDB0007979	HMDB0008011
810.6012__636.06	11.599	3.5359	0.014793	1.8299	2.12076	PC(16:0/22:4(7Z,10Z,13Z,16Z)); PC(18:0/20:4(5Z,8Z,11Z,14Z)); PC(18:0/20:4(8Z,11Z,14Z,17Z)); PC(18:1(11Z)/20:3(5Z,8Z,11Z)); PC(18:1(11Z)/20:3(8Z,11Z,14Z));	HMDB0007988	HMDB0008048	HMDB0008049	HMDB0008079	HMDB0008080
291.2323__402.08	10.44	3.384	0.034402	1.4634	1.91142	Androsterone; Epiandrosterone; Etiocholanolone; Epietiocholanolone; Dihydrotestosterone;	HMDB0000031	HMDB0000365	HMDB0000490	HMDB0000546	HMDB0002961
722.4912__572.06	9.1409	3.1923	0.0064219	2.1923	2.30197	PS(15:0/16:0); PS(16:0/15:0);	HMDB0112281	HMDB0112342
582.2746__24.54	6.4729	2.6944	0.052814	1.2773	1.80241	Streptomycin;	HMDB0015214
369.2983__541.93	5.2052	2.3799	0.071921	1.1431	1.67404	Octadecyl fumarate;	HMDB0038073
137.0839__712.28	3.9979	1.9992	0.088033	1.0554	1.58815	Tetrahydropteridine;	HMDB0001216
494.1427__325.81	3.9525	1.9828	0.038464	1.4149	1.87152	Malvidin 3-glucoside; Malvidin 3-galactoside;	HMDB0030777	HMDB0038010
119.0859__368.36	3.6945	1.8854	0.032603	1.4867	1.91893	Indane; alpha-Methylstyrene;	HMDB0059837	HMDB0059899
180.1023__198.47	3.608	1.8512	0.02393	1.6211	2.00269	2(N)-Methyl-norsalsolinol; (R)-Salsolinol; alpha-Methylphenylalanine; N-methylphenylalanine; Maltoxazine;	HMDB0001189	HMDB0005199	HMDB0029223	HMDB0029224	HMDB0030372
257.1388__280	3.5052	1.8095	0.092979	1.0316	1.52748	1-Methoxy-1-(2,4,5-trimethoxyphenyl)-2-propanol; 2-[4-(3-Hydroxypropyl)-2-methoxyphenoxy]-1,3-propanediol;	HMDB0031772	HMDB0040352
547.4018__586.91	3.4189	1.7735	0.060291	1.2197	1.74629	endo-1,4-beta-Xylanase;	HMDB0040436
177.0152__19.45	3.1785	1.6684	0.091934	1.0365	1.54309	Gentisic acid; 2-Pyrocatechuic acid; Protocatechuic acid; 2,6-Dihydroxybenzoic acid; 3,5-Dihydroxybenzoic acid;	HMDB0000152	HMDB0000397	HMDB0001856	HMDB0013676	HMDB0013677
114.0919__228.85	3.0841	1.6249	0.021073	1.6763	2.02257	2,5-Dihydro-2,4,5-trimethyloxazole; 1-Piperidinecarboxaldehyde; 2-Acetylpyrrolidine; Epsilon-caprolactam;	HMDB0031199	HMDB0031702	HMDB0037293	HMDB0062769
480.3095__410.22	2.9396	1.5556	0.069058	1.1608	1.68331	LysoPE(0:0/18:1(11Z)); LysoPE(0:0/18:1(9Z)); LysoPE(18:1(11Z)/0:0); LysoPE(18:1(9Z)/0:0);	HMDB0011475	HMDB0011476	HMDB0011505	HMDB0011506
411.3456__600.02	2.7849	1.4776	0.04594	1.3378	1.82364	MG(0:0/22:2(13Z,16Z)/0:0); MG(22:2(13Z,16Z)/0:0/0:0);	HMDB0011553	HMDB0011583
336.3266__545.46	2.7436	1.4561	0.049103	1.3089	1.78548	Pipericine;	HMDB0031678
336.3266__508.64	2.5899	1.3729	0.0084003	2.0757	2.24366	Pipericine;	HMDB0031678
675.4245__641	2.4557	1.2961	0.035499	1.4498	1.89415	PG(a-13:0/i-14:0); PG(i-12:0/a-15:0); PG(i-12:0/i-15:0); PG(i-13:0/i-14:0); PG(i-14:0/a-13:0);	HMDB0116644	HMDB0116656	HMDB0116663	HMDB0116680	HMDB0116690
311.2069__204.89	2.2902	1.1955	0.046582	1.3318	1.81426	2-trans,4-cis-Decadienoylcarnitine;	HMDB0013325
336.3266__470.94	2.2637	1.1787	0.034018	1.4683	1.92453	Pipericine;	HMDB0031678
469.0783__229.52	2.2301	1.1571	0.069662	1.157	1.66054	Cromoglicic acid;	HMDB0015138
221.0638__22.12	2.2166	1.1483	0.034256	1.4653	1.88705	2-(2-Thienylmethylene)-1,6-dioxaspiro[4.4]non-3-ene; Chrycorin;	HMDB0034857	HMDB0035149
317.0801__444.03	2.0553	1.0393	0.033294	1.4776	1.94895	2-S-cysteinyl-DOPA;	HMDB0062734
192.052__141.61	0.44228	-1.177	0.095245	1.0212	1.52819	Isosorbide Mononitrate; gamma-Carboxyglutamic acid;	HMDB0015155	HMDB0041900
246.1529__296.39	0.35666	-1.4874	0.076509	1.1163	1.64943	S-3-oxodecanoyl cysteamine;	HMDB0059773
569.4833__545.91	0.34556	-1.533	0.039993	1.398	1.8786	TG(10:0/13:0/8:0); TG(8:0/8:0/15:0); TG(10:0/a-13:0/8:0)[rac]; TG(8:0/10:0/i-13:0); TG(8:0/8:0/a-15:0)[rac];	HMDB0071165	HMDB0071222	HMDB0071443	HMDB0071663	HMDB0071676
328.2487__383.83	0.33602	-1.5734	0.073609	1.1331	1.67186	(9E)-10-nitrooctadecenoic Acid; (9E)-9-nitrooctadecenoic Acid;	HMDB0062737	HMDB0062738
429.3196__529.86	0.33554	-1.5754	0.039422	1.4043	1.89577	Sorbitan oleate; Glyceryl lactooleate;	HMDB0029886	HMDB0032298
105.0705__330.79	0.33152	-1.5928	0.0095215	2.0213	2.22463	Styrene;	HMDB0034240
268.1046__125.2	0.29883	-1.7426	0.040321	1.3945	1.84988	Adenosine; Deoxyguanosine; Neuraminic acid; Vidarabine; Zidovudine;	HMDB0000050	HMDB0000085	HMDB0000830	HMDB0014340	HMDB0014638
647.5135__493.85	0.29835	-1.7449	0.031983	1.4951	1.90343	SM(d18:1/12:0);	HMDB0012096
329.085__554.82	0.29301	-1.771	0.041619	1.3807	1.81816	6-[3-(carboxymethyl)phenoxy]-3,4,5-trihydroxyoxane-2-carboxylic acid; 3,4,5-trihydroxy-6-{[2-(3-hydroxyphenyl)acetyl]oxy}oxane-2-carboxylic acid; 3,4,5-trihydroxy-6-(2-methoxybenzoyloxy)oxane-2-carboxylic acid; 3,4,5-trihydroxy-6-(3-methoxybenzoyloxy)oxane-2-carboxylic acid; 6-(5-ethenyl-2,3-dihydroxyphenoxy)-3,4,5-trihydroxyoxane-2-carboxylic acid;	HMDB0125161	HMDB0125162	HMDB0126553	HMDB0127992	HMDB0128008
296.1314__13.59	0.27371	-1.8693	0.035438	1.4505	1.94227	7-Hydroxyheptaphylline; 3-hydroxy-1-methyl-4,5-diphenylpiperidine-2,6-dione; 3-hydroxy-1-methyl-2,6-dioxo-4,5-diphenylpiperidin-1-ium;	HMDB0041245	HMDB0134789	HMDB0134799
397.1504__192.34	0.23635	-2.081	0.064556	1.1901	1.6805	Aloesol 7-glucoside; Methyl (3x,4E,10R)-3,10-dihydroxy-4,11-dodecadiene-6,8-diynoate 10-glucoside; 3,4,5-trihydroxy-6-[5-methoxy-2-(4-methyl-3-oxopent-1-en-1-yl)phenoxy]oxane-2-carboxylic acid; 3,4,5-trihydroxy-6-{[5-(4-methoxyphenyl)-2-methyl-3-oxopent-4-en-2-yl]oxy}oxane-2-carboxylic acid;	HMDB0040565	HMDB0040897	HMDB0132952	HMDB0132957
833.2434__646.09	0.22306	-2.1645	0.020798	1.682	2.0429	8-[3,7-dihydroxy-2-(4-hydroxy-3-methoxyphenyl)-3,4-dihydro-2H-1-benzopyran-4-yl]-6-[2-(3,4-dihydroxyphenyl)-3,7-dihydroxy-3,4-dihydro-2H-1-benzopyran-4-yl]-2-(3-hydroxyphenyl)-3,4-dihydro-2H-1-benzopyran-3,5,7-triol; 6-[3,7-dihydroxy-2-(4-hydroxy-3-methoxyphenyl)-3,4-dihydro-2H-1-benzopyran-4-yl]-8-[2-(3,4-dihydroxyphenyl)-3,7-dihydroxy-3,4-dihydro-2H-1-benzopyran-4-yl]-2-(3-hydroxyphenyl)-3,4-di…	HMDB0135007	HMDB0135008	HMDB0135015	HMDB0135016	HMDB0135023
832.2426__645.73	0.21636	-2.2085	0.023709	1.6251	2.0067	Alatanin 2;	HMDB0038826
466.1139__114.43	0.21264	-2.2335	0.042679	1.3698	1.85415	Delphinidin 3-glucoside; 5,7-dihydroxy-3-{[3,4,5-trihydroxy-6-(hydroxymethyl)oxan-2-yl]oxy}-2-(3,4,5-trihydroxyphenyl)-1λ⁴-chromen-1-ylium; 3,7-dihydroxy-5-{[3,4,5-trihydroxy-6-(hydroxymethyl)oxan-2-yl]oxy}-2-(3,4,5-trihydroxyphenyl)-1λ⁴-chromen-1-ylium;	HMDB0037997	HMDB0130553	HMDB0130554
830.5684__443.87	0.21056	-2.2477	0.0081391	2.0894	2.26021	PC(18:2(9Z,12Z)/22:6(4Z,7Z,10Z,13Z,16Z,19Z)); PC(18:3(6Z,9Z,12Z)/22:5(4Z,7Z,10Z,13Z,16Z)); PC(18:3(6Z,9Z,12Z)/22:5(7Z,10Z,13Z,16Z,19Z)); PC(18:3(9Z,12Z,15Z)/22:5(4Z,7Z,10Z,13Z,16Z)); PC(18:3(9Z,12Z,15Z)/22:5(7Z,10Z,13Z,16Z,19Z));	HMDB0008156	HMDB0008187	HMDB0008188	HMDB0008220	HMDB0008221
758.5706__442.88	0.20924	-2.2568	0.035821	1.4459	1.90769	PC(14:0/20:2(11Z,14Z)); PC(14:1(9Z)/20:1(11Z)); PC(16:0/18:2(9Z,12Z)); PC(16:1(9Z)/18:1(11Z)); PC(16:1(9Z)/18:1(9Z));	HMDB0007880	HMDB0007912	HMDB0007973	HMDB0008004	HMDB0008005
357.0601__235.13	0.19738	-2.3409	0.03101	1.5085	1.94865	Xerocomic acid; Grevilline D; Grevilline C;	HMDB0029460	HMDB0033246	HMDB0033250
384.1446__558.93	0.19621	-2.3496	0.025625	1.5913	1.9911	13-Oxocryptopine; Gravacridonediolacetate;	HMDB0032878	HMDB0038554
218.1405__4.54	0.18625	-2.4247	0.058555	1.2324	1.75965	Propionylcarnitine;	HMDB0000824
401.2667__420.55	0.17153	-2.5435	0.069098	1.1605	1.63962	11'-Carboxy-gamma-tocotrienol; Colupulone;	HMDB0012518	HMDB0030065
391.2849__330.99	0.13514	-2.8874	0.0069961	2.1551	2.27054	12-Ketodeoxycholic acid; 7-Hydroxy-3-oxocholanoic acid; Nutriacholic acid; 7alpha-Hydroxy-3-oxo-5beta-cholan-24-oic acid; 9'-Carboxy-alpha-chromanol;	HMDB0000328	HMDB0000460	HMDB0000467	HMDB0000503	HMDB0012866
703.5761__442.68	0.099521	-3.3289	0.018618	1.7301	2.06994	SM(d18:1/16:0); SM(d18:0/16:1(9Z));	HMDB0010169	HMDB0013464
754.5374__444.09	0.081683	-3.6138	0.020865	1.6806	2.05348	PC(14:0/20:4(5Z,8Z,11Z,14Z)); PC(14:0/20:4(8Z,11Z,14Z,17Z)); PC(14:1(9Z)/20:3(5Z,8Z,11Z)); PC(14:1(9Z)/20:3(8Z,11Z,14Z)); PC(16:0/18:4(6Z,9Z,12Z,15Z));	HMDB0007883	HMDB0007884	HMDB0007914	HMDB0007915	HMDB0007976
810.6013__485.74	0.066877	-3.9023	0.031475	1.502	1.90744	PC(16:0/22:4(7Z,10Z,13Z,16Z)); PC(18:0/20:4(5Z,8Z,11Z,14Z)); PC(18:0/20:4(8Z,11Z,14Z,17Z)); PC(18:1(11Z)/20:3(5Z,8Z,11Z)); PC(18:1(11Z)/20:3(8Z,11Z,14Z));	HMDB0007988	HMDB0008048	HMDB0008049	HMDB0008079	HMDB0008080
748.5288__493.77	0.062773	-3.9937	0.082622	1.0829	1.63173	PE(P-16:0/22:6(4Z,7Z,10Z,13Z,16Z,19Z)); PE(20:5(5Z,8Z,11Z,14Z,17Z)/P-18:1(11Z)); PE(20:5(5Z,8Z,11Z,14Z,17Z)/P-18:1(9Z)); PE(22:6(4Z,7Z,10Z,13Z,16Z,19Z)/P-16:0); PE(P-18:1(11Z)/20:5(5Z,8Z,11Z,14Z,17Z));	HMDB0005780	HMDB0009479	HMDB0009480	HMDB0009708	HMDB0011420
724.5287__507.4	0.035685	-4.8085	0.09557	1.0197	1.60618	PE(18:3(6Z,9Z,12Z)/P-18:1(11Z)); PE(18:3(6Z,9Z,12Z)/P-18:1(9Z)); PE(18:3(9Z,12Z,15Z)/P-18:1(11Z)); PE(18:3(9Z,12Z,15Z)/P-18:1(9Z)); PE(18:4(6Z,9Z,12Z,15Z)/P-18:0);	HMDB0009149	HMDB0009150	HMDB0009182	HMDB0009183	HMDB0009214
689.5603__461.49	0.022349	-5.4836	0.086797	1.0615	1.62925	SM(d18:1/15:0); SM(d16:1/17:0);	HMDB0240608	HMDB0240617
806.5704__443.58	0.02142	-5.5449	0.038237	1.4175	1.90937	PC(16:0/22:6(4Z,7Z,10Z,13Z,16Z,19Z)); PC(16:1(9Z)/22:5(4Z,7Z,10Z,13Z,16Z)); PC(16:1(9Z)/22:5(7Z,10Z,13Z,16Z,19Z)); PC(18:1(11Z)/20:5(5Z,8Z,11Z,14Z,17Z)); PC(18:1(9Z)/20:5(5Z,8Z,11Z,14Z,17Z));	HMDB0007991	HMDB0008022	HMDB0008024	HMDB0008083	HMDB0008116
701.56__487.08	0.016186	-5.9491	0.018823	1.7253	2.06135	SM(d18:1/16:1(9Z)); SM(d18:2(4E,14Z)/16:0);	HMDB0240613	HMDB0240638
808.5864__475.36	0.013613	-6.1989	0.02727	1.5643	1.98862	PC(16:0/22:5(4Z,7Z,10Z,13Z,16Z)); PC(16:0/22:5(7Z,10Z,13Z,16Z,19Z)); PC(16:1(9Z)/22:4(7Z,10Z,13Z,16Z)); PC(18:0/20:5(5Z,8Z,11Z,14Z,17Z)); PC(18:1(11Z)/20:4(5Z,8Z,11Z,14Z));	HMDB0007989	HMDB0007990	HMDB0008021	HMDB0008050	HMDB0008081
758.5708__495.74	0.0085276	-6.8736	0.040183	1.396	1.85764	PC(14:0/20:2(11Z,14Z)); PC(14:1(9Z)/20:1(11Z)); PC(16:0/18:2(9Z,12Z)); PC(16:1(9Z)/18:1(11Z)); PC(16:1(9Z)/18:1(9Z));	HMDB0007880	HMDB0007912	HMDB0007973	HMDB0008004	HMDB0008005
307.0838__83.32	0.0039955	-7.9674	0.055737	1.2539	1.79912	(-)-Epigallocatechin; (+)-Gallocatechin; 3-(2,4,5-trihydroxyphenyl)-3,4-dihydro-2H-1-benzopyran-4,6,7-triol; 1,2-bis(2,4,5-trihydroxyphenyl)propan-1-one; 3-(3,4-dihydroxyphenyl)-1-(2,3,4,6-tetrahydroxyphenyl)propan-1-one;	HMDB0038361	HMDB0038365	HMDB0125021	HMDB0125022	HMDB0126028

## Sheet: POS_RK_vs_STZ
ID	FC	log2(FC)	raw.pval	#NAME?	VIP	Compound		HMDBID
264.1963__271.3	0.004881	-7.6786	0.00060008	3.2218	2.49871	N-Desmethylvenlafaxine; Tramadol; Desvenlafaxine; Hydroxy-alpha-sanshool;	blue	HMDB0013892	HMDB0014339	HMDB0015646	HMDB0029567
758.571__637.92	0.0064513	-7.2762	0.0057469	2.2406	2.19808	PC(14:0/20:2(11Z,14Z)); PC(14:1(9Z)/20:1(11Z)); PC(16:0/18:2(9Z,12Z)); PC(16:1(9Z)/18:1(11Z)); PC(16:1(9Z)/18:1(9Z));	blue	HMDB0007880	HMDB0007912	HMDB0007973	HMDB0008004	HMDB0008005
732.5546__647.82	0.0083488	-6.9042	0.00098947	3.0046	2.4503	PC(14:0/18:1(11Z)); PC(14:0/18:1(9Z)); PC(14:1(9Z)/18:0); PC(16:0/16:1(9Z)); PC(16:1(9Z)/16:0);	blue	HMDB0007872	HMDB0007873	HMDB0007904	HMDB0007969	HMDB0008001
291.2323__402.08	0.01211	-6.3677	0.0012482	2.9037	2.43321	Androsterone; Epiandrosterone; Etiocholanolone; Epietiocholanolone; Dihydrotestosterone;	blue	HMDB0000031	HMDB0000365	HMDB0000490	HMDB0000546	HMDB0002961
810.6013__485.74	0.013324	-6.2298	0.0084754	2.0718	2.16209	PC(16:0/22:4(7Z,10Z,13Z,16Z)); PC(18:0/20:4(5Z,8Z,11Z,14Z)); PC(18:0/20:4(8Z,11Z,14Z,17Z)); PC(18:1(11Z)/20:3(5Z,8Z,11Z)); PC(18:1(11Z)/20:3(8Z,11Z,14Z));	blue	HMDB0007988	HMDB0008048	HMDB0008049	HMDB0008079	HMDB0008080
760.5864__448.3	0.01381	-6.1782	0.0056819	2.2455	2.23075	PC(14:0/20:1(11Z)); PC(14:1(9Z)/20:0); PC(16:0/18:1(11Z)); PC(16:0/18:1(9Z)); PC(16:1(9Z)/18:0);	blue	HMDB0007879	HMDB0007911	HMDB0007971	HMDB0007972	HMDB0008003
529.3513__565.82	0.014688	-6.0892	0.0041439	2.3826	2.2644	Ganoderic acid V; (22S)-Acetoxy-3alpha,15alpha-dihydroxylanosta-7,9(11),24-trien-26-oic acid; (24E)-3alpha-Acetoxy-15alpha,22S-dihydroxylanosta-7,9(11),24-trien-26-oic acid;	blue	HMDB0033079	HMDB0035225	HMDB0035335
205.1955__437.08	0.01923	-5.7005	0.0012037	2.9195	2.43106	delta-Amorphene; (-)-3,5-Cadinadiene; alpha-Santalene; Sesquisabinene; beta-Selinene;	blue	HMDB0030644	HMDB0030673	HMDB0034939	HMDB0034943	HMDB0034997
137.1329__348.7	0.022106	-5.4994	0.025809	1.5882	1.93108	(+)-Limonene; (-)-Limonene; gamma-Terpinene; (+)-alpha-Pinene; cis-Ocimene;	blue	HMDB0003375	HMDB0004321	HMDB0005806	HMDB0006525	HMDB0030088
194.1545__189.07	0.022866	-5.4507	0.0020081	2.6972	2.37036	N-Cyclopropyl-trans-2-cis-6-nonadienamide;	blue	HMDB0032210
784.5858__646.52	0.026193	-5.2547	0.016393	1.7853	1.99515	PC(14:1(9Z)/22:2(13Z,16Z)); PC(16:0/20:3(5Z,8Z,11Z)); PC(16:0/20:3(8Z,11Z,14Z)); PC(16:1(9Z)/20:2(11Z,14Z)); PC(18:0/18:3(6Z,9Z,12Z));	blue	HMDB0007921	HMDB0007980	HMDB0007981	HMDB0008012	HMDB0008040
153.1278__341.89	0.034244	-4.868	0.0012879	2.8901	2.4215	(-)-trans-Carveol; Perillyl alcohol; Alpha-Pinene-oxide; p-Menth-3-en-9-al; Isocitral;	blue	HMDB0003450	HMDB0003634	HMDB0003667	HMDB0030892	HMDB0030893
135.1172__329.64	0.037773	-4.7265	0.00096297	3.0164	2.45552	p-Cymene; 1-Methyl-2-propylbenzene; p-Mentha-1,3,8-triene; 1-Isopropyl-2-methylbenzene; 1-Isopropyl-3-methylbenzene;	blue	HMDB0005805	HMDB0032627	HMDB0037013	HMDB0037050	HMDB0037051
760.5863__502.02	0.049651	-4.332	0.079916	1.0974	1.5732	PC(14:0/20:1(11Z)); PC(14:1(9Z)/20:0); PC(16:0/18:1(11Z)); PC(16:0/18:1(9Z)); PC(16:1(9Z)/18:0);	blue	HMDB0007879	HMDB0007911	HMDB0007971	HMDB0007972	HMDB0008003
760.5861__647.48	0.053312	-4.2294	0.027128	1.5666	1.90117	PC(14:0/20:1(11Z)); PC(14:1(9Z)/20:0); PC(16:0/18:1(11Z)); PC(16:0/18:1(9Z)); PC(16:1(9Z)/18:0);	blue	HMDB0007879	HMDB0007911	HMDB0007971	HMDB0007972	HMDB0008003
135.1173__189.1	0.055108	-4.1816	0.0014926	2.8261	2.40344	p-Cymene; 1-Methyl-2-propylbenzene; p-Mentha-1,3,8-triene; 1-Isopropyl-2-methylbenzene; 1-Isopropyl-3-methylbenzene;	blue	HMDB0005805	HMDB0032627	HMDB0037013	HMDB0037050	HMDB0037051
732.5551__463	0.056598	-4.1431	0.027232	1.5649	1.90122	PC(14:0/20:1(11Z)); PC(14:1(9Z)/20:0); PC(16:0/18:1(11Z)); PC(16:0/18:1(9Z)); PC(16:1(9Z)/18:0);	blue	HMDB0007879	HMDB0007911	HMDB0007971	HMDB0007972	HMDB0008003
346.2594__383.83	0.061671	-4.0193	0.0024692	2.6074	2.33305	3-hydroxyundecanoyl carnitine;	blue	HMDB0061637
808.5864__475.36	0.06704	-3.8988	0.051008	1.2924	1.73422	PC(16:0/22:5(4Z,7Z,10Z,13Z,16Z)); PC(16:0/22:5(7Z,10Z,13Z,16Z,19Z)); PC(16:1(9Z)/22:4(7Z,10Z,13Z,16Z)); PC(18:0/20:5(5Z,8Z,11Z,14Z,17Z)); PC(18:1(11Z)/20:4(5Z,8Z,11Z,14Z));	blue	HMDB0007989	HMDB0007990	HMDB0008021	HMDB0008050	HMDB0008081
151.1122__264.85	0.073299	-3.7701	0.00079723	3.0984	2.47712	Thymol; Perillyl aldehyde; (S)-Carvone; 2-(4-Methylphenyl)-2-propanol; 2-Methyl-1-phenyl-2-propanol;	blue	HMDB0001878	HMDB0003647	HMDB0004487	HMDB0029652	HMDB0031570
302.1784__443.04	0.079711	-3.6491	0.0074353	2.1287	2.14234	Dobutamine; (E,E)-Futoamide; (6E)-Piperamide-C7:1; Ractopamine;	blue	HMDB0014979	HMDB0032654	HMDB0038648	HMDB0240368
294.2046__406.91	0.084155	-3.5708	0.0028865	2.5396	2.3166	Nonivamide; Nordihydrocapsaicin;	blue	HMDB0029846	HMDB0036328
758.5706__442.88	0.09896	-3.337	0.0056747	2.2461	2.21908	PC(14:0/20:2(11Z,14Z)); PC(14:1(9Z)/20:1(11Z)); PC(16:0/18:2(9Z,12Z)); PC(16:1(9Z)/18:1(11Z)); PC(16:1(9Z)/18:1(9Z));	blue	HMDB0007880	HMDB0007912	HMDB0007973	HMDB0008004	HMDB0008005
260.1123__86.25	0.099702	-3.3262	0.0023815	2.6232	2.35123	Fumarycarnitine; Osmaronin;	blue	HMDB0013134	HMDB0032769
244.1702__205.03	0.10123	-3.3043	0.0021767	2.6622	2.34923	Chalciporone;	blue	HMDB0033526
268.0679__191.28	0.1162	-3.1053	0.0014611	2.8353	2.40788	2-Amino-4-oxo-6-(1',2'-dioxoprolyl)-7,8-dihydroxypteridine;	blue	HMDB0001410
328.2487__383.83	0.1175	-3.0892	0.0031198	2.5059	2.29816	(9E)-10-nitrooctadecenoic Acid; (9E)-9-nitrooctadecenoic Acid;	blue	HMDB0062737	HMDB0062738
133.1016__319.28	0.11833	-3.0791	0.0017121	2.7665	2.3756	p-Mentha-1,3,5,8-tetraene;	blue	HMDB0029641
151.087__118.54	0.12876	-2.9572	0.00017028	3.7688	2.62396	6-Methylnicotinamide; 2-Acetyl-3-ethylpyrazine; 7,8-Dihydro-3-methylpyrrolo[1,2-a]pyrimidin-2(6H)-one; 2-Acetyl-3,6-dimethylpyrazine; 2-Acetyl-3,5-dimethylpyrazine;	blue	HMDB0013704	HMDB0029410	HMDB0038513	HMDB0039998	HMDB0039999
772.6155__623.09	0.13001	-2.9433	0.017501	1.7569	2.01553	PC(18:0/P-18:1(11Z)); PC(18:0/P-18:1(9Z)); PC(18:1(11Z)/P-18:0); PC(18:1(9Z)/P-18:0); PC(20:1(11Z)/P-16:0);	blue	HMDB0008062	HMDB0008063	HMDB0008094	HMDB0008127	HMDB0008324
366.2057__407.32	0.13279	-2.9127	0.0022148	2.6547	2.35325	20-Carboxy-leukotriene B4; 12-oxo-10,11-dihydro-20-COOH-LTB4; 12-oxo-20-dihydroxy-leukotriene B4; Anhydrocinnzeylanol; Sporotrichiol;	blue	HMDB0006059	HMDB0012549	HMDB0012551	HMDB0036863	HMDB0037062
118.0657__348.83	0.13735	-2.8641	0.0045361	2.3433	2.25996	Indole; Benzeneacetonitrile;	blue	HMDB0000738	HMDB0034171
291.084__58.96	0.15145	-2.7231	0.089263	1.0493	1.57115	Epicatechin; Catechin; 3-Hydroxyphloretin; gamma-Pyrufuran; alpha-Cotonefuran;	blue	HMDB0001871	HMDB0002780	HMDB0029253	HMDB0030131	HMDB0030144
133.0865__183.99	0.15369	-2.7019	0.016825	1.774	1.9838	2-Hydroxy-3-methylpentanoic acid; (5R)-5-Hydroxyhexanoic acid; 5-Hydroxyhexanoic acid; D-Leucic acid; Leucinic acid;	blue	HMDB0000317	HMDB0000409	HMDB0000525	HMDB0000624	HMDB0000665
731.6074__444.85	0.15902	-2.6527	0.024852	1.6046	1.8829	SM(d18:1/18:0); SM(d18:0/18:1(11Z)); SM(d18:0/18:1(9Z));	blue	HMDB0001348	HMDB0012088	HMDB0012089
169.1228__264.87	0.16147	-2.6307	0.0003678	3.4344	2.55261	trans-4,5-epoxy-2(E)-decenal; Ethyl (4Z)-4,7-octadienoate; Methyl octynecarboxylate; (+/-)-Dihydromintlactone; 2,4-Hexadienyl butyrate;	blue	HMDB0013105	HMDB0031156	HMDB0031273	HMDB0032219	HMDB0032312
768.5544__639.17	0.17133	-2.5451	0.061355	1.2121	1.65473	PC(15:0/20:4(5Z,8Z,11Z,14Z)); PC(15:0/20:4(8Z,11Z,14Z,17Z)); PC(20:4(5Z,8Z,11Z,14Z)/15:0); PC(20:4(8Z,11Z,14Z,17Z)/15:0); PE(16:0/22:4(7Z,10Z,13Z,16Z));	blue	HMDB0007949	HMDB0007950	HMDB0008428	HMDB0008461	HMDB0008943
754.5374__444.09	0.17194	-2.54	0.021475	1.6681	1.958	PC(14:0/20:4(5Z,8Z,11Z,14Z)); PC(14:0/20:4(8Z,11Z,14Z,17Z)); PC(14:1(9Z)/20:3(5Z,8Z,11Z)); PC(14:1(9Z)/20:3(8Z,11Z,14Z)); PC(16:0/18:4(6Z,9Z,12Z,15Z));	blue	HMDB0007883	HMDB0007884	HMDB0007914	HMDB0007915	HMDB0007976
218.1058__89.59	0.17812	-2.4891	0.00010077	3.9967	2.66403	1-Isothiocyanato-8-(methylthio)octane;	blue	HMDB0038447
219.1371__109.14	0.18152	-2.4618	0.043485	1.3617	1.74138	(R)-Pterosin B; Dimethylbenzyl carbinyl crotonate; Isoamyl cinnamate; 2-(3-Hydroxy-4-methylphenyl)-5-methyl-4-hexen-3-one; cis-3-Hexenyl phenylacetate;	blue	HMDB0030759	HMDB0032227	HMDB0037704	HMDB0037738	HMDB0038281
830.5684__443.87	0.19506	-2.358	0.025168	1.5991	1.92047	PC(18:2(9Z,12Z)/22:6(4Z,7Z,10Z,13Z,16Z,19Z)); PC(18:3(6Z,9Z,12Z)/22:5(4Z,7Z,10Z,13Z,16Z)); PC(18:3(6Z,9Z,12Z)/22:5(7Z,10Z,13Z,16Z,19Z)); PC(18:3(9Z,12Z,15Z)/22:5(4Z,7Z,10Z,13Z,16Z)); PC(18:3(9Z,12Z,15Z)/22:5(7Z,10Z,13Z,16Z,19Z));	blue	HMDB0008156	HMDB0008187	HMDB0008188	HMDB0008220	HMDB0008221
353.0922__36.46	0.20529	-2.2843	0.025619	1.5914	1.90216	N-(Carbethoxyacetyl)-4-chloro-L-tryptophan;	blue	HMDB0030399
156.9911__348.12	0.21017	-2.2503	0.062712	1.2026	1.6761	Phosphoglycolic acid;	blue	HMDB0000816
760.5865__409.75	0.22955	-2.1231	0.075149	1.1241	1.62231	PC(14:0/20:1(11Z)); PC(14:1(9Z)/20:0); PC(16:0/18:1(11Z)); PC(16:0/18:1(9Z)); PC(16:1(9Z)/18:0);	blue	HMDB0007879	HMDB0007911	HMDB0007971	HMDB0007972	HMDB0008003
134.0605__61.74	0.23547	-2.0864	0.045137	1.3455	1.74158	Indoxyl; 4-Hydroxybenzeneacetonitrile; 2-Methyl-4,5-benzoxazole; (±)-2-Hydroxy-2-phenylacetonitrile; 5-Hydroxyindole;	blue	HMDB0004094	HMDB0029757	HMDB0032390	HMDB0034666	HMDB0059805
212.1035__116.22	0.27513	-1.8618	0.014847	1.8284	2.02978	Zalcitabine; N-Acetyl-1-methylhistidine; N-Acetyl-3-methylhistidine;	blue	HMDB0015078	HMDB0240340	HMDB0240341
721.5789__632.64	0.29376	-1.7673	0.027858	1.555	1.89872	DG(22:2(13Z,16Z)/22:6(4Z,7Z,10Z,13Z,16Z,19Z)/0:0); DG(22:4(7Z,10Z,13Z,16Z)/22:4(7Z,10Z,13Z,16Z)/0:0); DG(22:6(4Z,7Z,10Z,13Z,16Z,19Z)/22:2(13Z,16Z)/0:0); DG(22:2n6/0:0/22:6n3); DG(22:4n6/0:0/22:4n6);	blue	HMDB0007672	HMDB0007698	HMDB0007784	HMDB0056350	HMDB0056351
105.0706__188.81	0.29733	-1.7498	0.025156	1.5994	1.92894	Styrene;	blue	HMDB0034240
171.1132__75.15	0.31247	-1.6782	0.051695	1.2866	1.69952	Levetiracetam; (3xi,6xi)-Cyclo(alanylvalyl);	blue	HMDB0015333	HMDB0033926
582.2746__24.54	0.35087	-1.511	0.043114	1.3654	1.7437	Streptomycin;	blue	HMDB0015214
195.1232__157.85	0.3637	-1.4592	0.035933	1.4445	1.8021	Tetraethylene glycol;	blue	HMDB0094708
480.3095__410.22	0.36572	-1.4512	0.019737	1.7047	1.96036	LysoPE(0:0/18:1(11Z)); LysoPE(0:0/18:1(9Z)); LysoPE(18:1(11Z)/0:0); LysoPE(18:1(9Z)/0:0);	blue	HMDB0011475	HMDB0011476	HMDB0011505	HMDB0011506
806.5704__443.58	0.39011	-1.3581	0.048093	1.3179	1.72046	PC(16:0/22:6(4Z,7Z,10Z,13Z,16Z,19Z)); PC(16:1(9Z)/22:5(4Z,7Z,10Z,13Z,16Z)); PC(16:1(9Z)/22:5(7Z,10Z,13Z,16Z,19Z)); PC(18:1(11Z)/20:5(5Z,8Z,11Z,14Z,17Z)); PC(18:1(9Z)/20:5(5Z,8Z,11Z,14Z,17Z));	blue	HMDB0007991	HMDB0008022	HMDB0008024	HMDB0008083	HMDB0008116
317.0801__444.03	0.39294	-1.3476	0.0087266	2.0592	2.14989	2-S-cysteinyl-DOPA;	blue	HMDB0062734
219.1749__275.94	0.41003	-1.2862	0.035181	1.4537	1.83305	Nookatone; (5alpha,10alpha)-3,7(11)-Eudesmadien-2-one; (5beta,7beta,10beta)-3,11-Eudesmadien-2-one; beta-Sinensal; Solavetivone;	blue	HMDB0013687	HMDB0035081	HMDB0035082	HMDB0035643	HMDB0035657
661.4304__582.4	2.0049	1.0035	0.05161	1.2873	1.72208	Tsugaric acid A 21-glucosyl ester;	red	HMDB0033425
301.1415__25.84	2.0557	1.0396	0.093585	1.0288	1.50228	Myrigalone E; 1,3-Diacetoxy-4,6,12-tetradecatriene-8,10-diyne; Myrigalone A; Myrigalon B; Verimol C;	red	HMDB0030755	HMDB0030922	HMDB0037245	HMDB0037246	HMDB0038325
138.0555__149.19	2.0639	1.0454	0.03052	1.5154	1.83121	Trigonelline; 2-Aminobenzoic acid; p-Aminobenzoic acid; 3-Pyridylacetic acid; m-Aminobenzoic acid;	red	HMDB0000875	HMDB0001123	HMDB0001392	HMDB0001538	HMDB0001891
709.1684__587.85	2.0741	1.0525	0.003649	2.4378	2.30968	6-{1-carboxy-2-oxo-2-[(3,4,5-trihydroxy-6-{[5-hydroxy-3-(4-methoxyphenyl)-4-oxo-4H-chromen-7-yl]oxy}oxan-2-yl)methoxy]ethyl}-3,4,5-trihydroxyoxane-2-carboxylic acid;	red	HMDB0129967
311.127__483.94	2.1601	1.1111	0.028208	1.5496	1.87617	Artocarbene; Moracin C; Hydroxytanshinone; Moracin N; 5-[(E)-2-(3,4-dihydroxyphenyl)ethenyl]-2-[(1E)-3-methylbuta-1,3-dien-1-yl]benzene-1,3-diol;	red	HMDB0031744	HMDB0033310	HMDB0036635	HMDB0041298	HMDB0129039
246.1529__296.39	2.5162	1.3312	0.089868	1.0464	1.51843	S-3-oxodecanoyl cysteamine;	red	HMDB0059773
112.0764__152.62	2.537	1.3431	0.0041354	2.3835	2.27439	N-Acetyl-2,3-dihydro-1H-pyrrole; 5-Acetyl-3,4-dihydro-2H-pyrrole; 2-Ethyl-4-methyloxazole; 4-Ethyl-2-methyloxazole; 2-Ethyl-5-methyloxazole;	red	HMDB0031163	HMDB0031308	HMDB0037837	HMDB0037838	HMDB0037858
266.1157__31.67	2.5524	1.3519	0.088628	1.0524	1.5225	Anonaine; Eduleine; Eduline; Agaritinal;	red	HMDB0030348	HMDB0037594	HMDB0040597	HMDB0040694
538.5208__634.88	2.8725	1.5223	0.047412	1.3241	1.72786	Cer(d18:1/16:0);	red	HMDB0004949
521.3598__580.66	2.9089	1.5405	0.079432	1.1	1.55721	LysoPA(24:1(15Z)/0:0);	red	HMDB0114757
391.2849__330.99	3.1707	1.6648	0.025593	1.5919	1.89764	12-Ketodeoxycholic acid; 7-Hydroxy-3-oxocholanoic acid; Nutriacholic acid; 7alpha-Hydroxy-3-oxo-5beta-cholan-24-oic acid; 9'-Carboxy-alpha-chromanol;	red	HMDB0000328	HMDB0000460	HMDB0000467	HMDB0000503	HMDB0012866
160.0761__144.48	3.3515	1.7448	0.0096505	2.0154	2.119	Indoleacetaldehyde; N-Hydroxy-1-aminonaphthalene;	red	HMDB0001190	HMDB0062503
466.1139__114.43	3.4271	1.777	0.0041006	2.3871	2.26179	Delphinidin 3-glucoside; 5,7-dihydroxy-3-{[3,4,5-trihydroxy-6-(hydroxymethyl)oxan-2-yl]oxy}-2-(3,4,5-trihydroxyphenyl)-1λ⁴-chromen-1-ylium; 3,7-dihydroxy-5-{[3,4,5-trihydroxy-6-(hydroxymethyl)oxan-2-yl]oxy}-2-(3,4,5-trihydroxyphenyl)-1λ⁴-chromen-1-ylium;	red	HMDB0037997	HMDB0130553	HMDB0130554
647.5135__493.85	3.6409	1.8643	0.028712	1.5419	1.87357	SM(d18:1/12:0);	red	HMDB0012096
369.2984__636.04	3.814	1.9313	0.097969	1.0089	1.5031	Octadecyl fumarate;	red	HMDB0038073
429.3196__529.86	3.8709	1.9527	0.029641	1.5281	1.85764	Sorbitan oleate; Glyceryl lactooleate;	red	HMDB0029886	HMDB0032298
122.0606__31.61	4.1596	2.0565	0.012187	1.9141	2.07241	Benzamide; 3-Acetylpyridine; 2-Acetylpyridine;	red	HMDB0004461	HMDB0033131	HMDB0035281
138.0666__20.83	4.2557	2.0894	0.036633	1.4361	1.82566	Isoniazid;	red	HMDB0015086
137.0839__712.28	5.3468	2.4187	0.066825	1.1751	1.62561	Tetrahydropteridine;	red	HMDB0001216
700.5733__551.75	7.0219	2.8119	0.020395	1.6905	1.96078	GlcCer(d18:1/16:0); Galactosylceramide (d18:1/16:0);	red	HMDB0004971	HMDB0010708
719.556__644.75	7.6213	2.93	0.0041731	2.3795	2.27218	PA(15:0/22:0); PA(20:0/17:0); PA(21:0/16:0); PA(22:0/15:0); PA(20:0/a-17:0);	red	HMDB0114824	HMDB0115066	HMDB0115229	HMDB0115242	HMDB0115631
428.0377__47.45	8.4096	3.072	0.028312	1.548	1.88246	Adenosine 3',5'-diphosphate; dGDP; ADP;	red	HMDB0000061	HMDB0000960	HMDB0001341
100.0763__32.8	9.4314	3.2375	0.09511	1.0218	1.51718	2-Piperidinone; 1-Pyrrolidinecarboxaldehyde; 2,5-Dihydro-2,4-dimethyloxazole; (2R)-2-Hydroxy-2-methylbutanenitrile;	red	HMDB0011749	HMDB0034587	HMDB0040518	HMDB0060309
122.0606__105.02	11.452	3.5175	0.0030111	2.5213	2.30611	Benzamide; 3-Acetylpyridine; 2-Acetylpyridine;	red	HMDB0004461	HMDB0033131	HMDB0035281
617.5127__641.26	12.299	3.6205	0.054799	1.2612	1.69972	DG(14:0/22:4(7Z,10Z,13Z,16Z)/0:0); DG(16:0/20:4(5Z,8Z,11Z,14Z)/0:0); DG(16:0/20:4(8Z,11Z,14Z,17Z)/0:0); DG(16:1(9Z)/20:3(5Z,8Z,11Z)/0:0); DG(16:1(9Z)/20:3(8Z,11Z,14Z)/0:0);	red	HMDB0007031	HMDB0007112	HMDB0007113	HMDB0007139	HMDB0007140
345.0628__71.84	19.593	4.2923	0.047866	1.32	1.71702	Aflatoxin GM1; Wharangin; 5-hydroxy-11-methoxy-6,8,19-trioxapentacyclo[10.7.0.0²,⁹.0³,⁷.0¹³,¹⁷]nonadeca-1(12),2(9),10,13(17)-tetraene-4,16,18-trione;	red	HMDB0030477	HMDB0037754	HMDB0142065
307.0838__83.32	29.816	4.898	0.06211	1.2068	1.62742	(-)-Epigallocatechin; (+)-Gallocatechin; 3-(2,4,5-trihydroxyphenyl)-3,4-dihydro-2H-1-benzopyran-4,6,7-triol; 1,2-bis(2,4,5-trihydroxyphenyl)propan-1-one; 3-(3,4-dihydroxyphenyl)-1-(2,3,4,6-tetrahydroxyphenyl)propan-1-one;	red	HMDB0038361	HMDB0038365	HMDB0125021	HMDB0125022	HMDB0126028
471.2382__585.27	36.877	5.2046	0.077026	1.1134	1.59802	Lucidenic acid D1;	red	HMDB0038199
322.0777__73.86	121	6.9189	0.011629	1.9345	2.07537	Beta-Citryl-L-glutamic acid;	red	HMDB0013220
165.0414__107	140.31	7.1325	0.038113	1.4189	1.78511	S-2-Propenyl 1-propanesulfinothioate; R-1-Propenyl 1-propanesulfinothioate; R-Propyl 1-propenesulfinothioate; S-Propyl 2-propene-1-sulfinothioate;	red	HMDB0032741	HMDB0032748	HMDB0032749	HMDB0039965
405.0104__29.31	141.48	7.1444	0.0196	1.7078	1.96444	Uridine 5'-diphosphate;	red	HMDB0000295
203.2236__145.18	223.25	7.8025	0.012996	1.8862	2.04328	Spermine;	red	HMDB0001256
146.1656__23.3	332.7	8.3781	0.010066	1.9972	2.10292	Spermidine;	red	HMDB0001257
