# Supplementary material for: Study on the signaling pathways involved in the anti-hyperglycemic effect of raspberry ketone on zebrafish using integrative transcriptome and metabolome analyses
Source: Royal Society of Chemistry journal article supplement (doi:10.1039/d4fo01675k), 2024-01-01
Supplement: d4fo01675k2.xlsx [file d4fo01675k2.xlsx]

## Sheet: Group_Control-VS-STZ_DEGs
geneID	length	S4-1.rawreads	S4-1.FPKM	S4-2.rawreads	S4-2.FPKM	S4-3.rawreads	S4-3.FPKM	S5-1.rawreads	S5-1.FPKM	S5-2.rawreads	S5-2.FPKM	S5-3.rawreads	S5-3.FPKM	baseMean	log2FoldChange	lfcSE	stat	pvalue	padj	Regulation	Chr	Start	End	Strand	GeneSymbol	Description	GO_BP	GO_CC	GO_MF	KO	Pathway
ENSDARG00000099511	3146	139	2.83	157	3.99	288	5.76	8	0.21	11	0.32	17	0.42	87.9019	-3.61759	0.65868	-5.49217	3.97017e-08	0.00083074	Down	22	7971101	8074212	-	CABZ01034698.2	-	-	-	-	-	-
ENSDARG00000069734	650	4	0.39	5	0.62	2	0.19	11	1.43	307	43.49	216	26.01	108.77	6.09134	1.12567	5.4113	6.25675e-08	0.00083074	Ups	3	55091230	55092051	-	hbba2	hemoglobin%2C beta adult 2 [Source:ZFIN%3BAcc:ZDB-GENE-040801-164]	-	GO:0005833:hemoglobin complex;	GO:0020037:heme binding;GO:0046872:metal ion binding;GO:0019825:oxygen binding;GO:0005344:oxygen transporter activity;	K13825	-
ENSDARG00000041257	1359	37	1.75	128	7.53	112	5.19	283	17.54	1510	102.3	2010	115.75	752.655	4.11851	0.824778	4.99348	5.93015e-07	0.00524918	Ups	14	17108003	17121713	-	smtnl1	smoothelin-like 1 [Source:ZFIN%3BAcc:ZDB-GENE-050306-23]	GO:0030036:actin cytoskeleton organization;GO:0003085:negative regulation of systemic arterial blood pressure;GO:0060452:positive regulation of cardiac muscle contraction;	GO:0005737:cytoplasm;GO:0031941:filamentous actin;GO:0005815:microtubule organizing center;	GO:0003779:actin binding;	-	-
ENSDARG00000069735	564	0	0	6	0.85	1	0.11	20	2.99	330	53.87	101	14.01	98.1512	6.45793	1.31469	4.91214	9.00862e-07	0.0059806	Ups	3	55093581	55094399	+	hbaa2	hemoglobin%2C alpha adult 2 [Source:ZFIN%3BAcc:ZDB-GENE-081104-38]	-	GO:0005833:hemoglobin complex;	GO:0020037:heme binding;GO:0046872:metal ion binding;GO:0019825:oxygen binding;GO:0005344:oxygen transporter activity;	K13826	-
ENSDARG00000092233	4595	0	0	1	0.02	0	0	33	0.6	24	0.48	39	0.66	17.7796	6.88262	1.44268	4.77073	1.83556e-06	0.00974865	Ups	22	24730965	24738188	-	vtg1	vitellogenin 1 [Source:ZFIN%3BAcc:ZDB-GENE-001201-1]	GO:0034605:cellular response to heat;GO:0032355:response to estradiol;GO:0032868:response to insulin;GO:1903165:response to polycyclic arene;	GO:0005829:cytosol;GO:0005615:extracellular space;GO:0060417:yolk;	GO:0005319:lipid transporter activity;GO:0045735:nutrient reservoir activity;GO:0005102:receptor binding;	-	-
ENSDARG00000092732	3552	4	0.07	14	0.32	4	0.07	266	6.31	8	0.21	290	6.39	97.7586	4.81998	1.10949	4.34432	1.39709e-05	0.0618327	Ups	22	4772860	4868321	-	si:ch73-256j6.5	si:ch73-256j6.5 [Source:ZFIN%3BAcc:ZDB-GENE-070705-225]	-	-	-	-	-
ENSDARG00000071173	6367	1	0.01	8	0.1	1	0.01	12	0.16	190	2.75	81	1	60.9869	5.24593	1.24729	4.20586	2.60096e-05	0.0986694	Ups	7	4332430	4380448	+	slc12a10.2	solute carrier family 12 member 10%2C tandem duplicate 2 [Source:ZFIN%3BAcc:ZDB-GENE-060503-425]	GO:0006884:cell volume homeostasis;GO:0055064:chloride ion homeostasis;GO:1902476:chloride transmembrane transport;GO:0006811:ion transport;GO:0055075:potassium ion homeostasis;GO:1990573:potassium ion import across plasma membrane;GO:0055078:sodium ion homeostasis;GO:0035725:sodium ion transmembrane transport;GO:0006814:sodium ion transport;	GO:0016324:apical plasma membrane;GO:0005829:cytosol;GO:0070062:extracellular exosome;GO:0005887:integral component of plasma membrane;GO:0016020:membrane;GO:0005886:plasma membrane;	GO:0015379:potassium:chloride symporter activity;GO:0015081:sodium ion transmembrane transporter activity;GO:0015378:sodium:chloride symporter activity;GO:0008511:sodium:potassium:chloride symporter activity;	K08821	;ko05202 Transcriptional misregulation in cancer;
ENSDARG00000007739	3311	2	0.04	4	0.1	0	0	13	0.33	87	2.42	38	0.9	29.6227	5.01599	1.24078	4.0426	5.28624e-05	0.156513	Ups	1	1789357	1796832	+	atp1a1a.2	ATPase Na+/K+ transporting subunit alpha 1a%2C tandem duplicate 2 [Source:ZFIN%3BAcc:ZDB-GENE-001212-2]	GO:0006814:sodium ion transport;	GO:0016021:integral component of membrane;GO:0005886:plasma membrane;GO:0042383:sarcolemma;	GO:0005524:ATP binding;GO:0046872:metal ion binding;GO:0008556:potassium-transporting ATPase activity;	K01539	;ko04022 cGMP-PKG signaling pathway;ko04024 cAMP signaling pathway;ko04260 Cardiac muscle contraction;ko04261 Adrenergic signaling in cardiomyocytes;ko04911 Insulin secretion;ko04918 Thyroid hormone synthesis;ko04919 Thyroid hormone signaling pathway;ko04925 Aldosterone synthesis and secretion;ko04960 Aldosterone-regulated sodium reabsorption;ko04961 Endocrine and other factor-regulated calcium r…
ENSDARG00000103634	5779	308	3.42	1189	16.45	682	7.43	113	1.65	25	0.4	18	0.24	359.182	-3.48806	0.866137	-4.02714	5.64584e-05	0.156513	Down	12	43701777	43711918	-	CU914622.2	si:ch73-329n5.6 [Source:NCBI gene%3BAcc:101883339]	-	-	-	-	-
ENSDARG00000074546	5993	2	0.02	749	10	282	2.96	1	0.01	9	0.14	9	0.12	169.154	-5.50503	1.37043	-4.01702	5.89393e-05	0.156513	Down	22	9060699	9096248	+	si:ch211-213a13.2	si:ch211-213a13.2 [Source:ZFIN%3BAcc:ZDB-GENE-050208-551]	-	-	-	K12800	;ko04217 Necroptosis;ko04621 NOD-like receptor signaling pathway;ko04625 C-type lectin receptor signaling pathway;ko05130 Pathogenic Escherichia coli infection;ko05131 Shigellosis;ko05132 Salmonella infection;ko05133 Pertussis;ko05135 Yersinia infection;ko05164 Influenza A;ko05171 Coronavirus disease - COVID-19;
ENSDARG00000094960	488	3756	493.77	10	1.64	2016	260.07	64	11.05	1	0.19	42	6.74	732.121	-5.28179	1.34637	-3.92299	8.74564e-05	0.211128	Down	22	25007941	25008757	-	AL929032.1	uncharacterized LOC795984 [Source:NCBI gene%3BAcc:795984]	-	-	-	-	-
ENSDARG00000100429	3105	4	0.08	1	0.03	4	0.08	4	0.11	92	2.73	43	1.08	30.1545	4.59914	1.2224	3.76237	0.000168308	0.372452	Ups	3	938438	945007	+	irgf4	immunity-related GTPase family%2C f4 [Source:ZFIN%3BAcc:ZDB-GENE-060929-404]	-	-	-	K12012	-
ENSDARG00000080675	5927	0	0	2	0.03	0	0	9	0.13	111	1.72	2	0.03	28.5799	6.50373	1.80801	3.59719	0.000321676	0.657085	Ups	16	21946091	22006996	-	si:dkey-71b5.7	si:dkey-71b5.7 [Source:ZFIN%3BAcc:ZDB-GENE-100922-124]	-	-	-	-	-
ENSDARG00000112132	3878	15	0.25	77	1.59	5	0.08	0	0	1	0.02	0	0	15.8567	-6.27497	1.76019	-3.56494	0.000363943	0.690322	Down	16	40217043	40220920	+	BX470182.1	-	-	-	-	-	-
ENSDARG00000109643	4543	289	4.08	0	0	284	3.94	5	0.09	0	0	6	0.1	73.5542	-5.27341	1.56749	-3.36423	0.000767585	0.999831	Down	3	57268363	57323496	+	TMEM235	transmembrane protein 235 [Source:HGNC Symbol%3BAcc:HGNC:27563]	-	-	-	K08378	-
ENSDARG00000090461	5669	0	0	3	0.04	4	0.04	14	0.21	138	2.24	2	0.03	36.5889	5.11641	1.53831	3.32598	0.000881072	0.999831	Ups	4	33720803	33763368	-	si:ch211-197f20.1	si:ch211-197f20.1 [Source:ZFIN%3BAcc:ZDB-GENE-081103-44]	-	-	-	K12800	;ko04217 Necroptosis;ko04621 NOD-like receptor signaling pathway;ko04625 C-type lectin receptor signaling pathway;ko05130 Pathogenic Escherichia coli infection;ko05131 Shigellosis;ko05132 Salmonella infection;ko05133 Pertussis;ko05135 Yersinia infection;ko05164 Influenza A;ko05171 Coronavirus disease - COVID-19;
ENSDARG00000059956	2340	142	3.89	42	1.44	41	1.1	9	0.32	8	0.31	4	0.13	33.6292	-2.85381	0.861494	-3.31263	0.000924248	0.999831	Down	23	17387325	17404011	+	ptk6b	PTK6 protein tyrosine kinase 6b [Source:ZFIN%3BAcc:ZDB-GENE-060929-1150]	-	-	-	K08894	-
ENSDARG00000026904	1146	18	1.01	168	11.72	25	1.37	1	0.07	2	0.16	9	0.61	36.189	-4.05564	1.22512	-3.31041	0.000931607	0.999831	Down	2	37874771	37878304	+	cbln13	cerebellin 13 [Source:ZFIN%3BAcc:ZDB-GENE-070912-288]	-	-	-	-	-
ENSDARG00000101598	3849	6	0.1	18	0.37	5	0.08	3	0.07	319	7.63	64	1.3	90.1555	4.27802	1.2981	3.29559	0.000982151	0.999831	Ups	4	46890749	46915962	-	si:ch211-215p11.1	si:ch211-215p11.1 [Source:ZFIN%3BAcc:ZDB-GENE-060531-33]	-	-	-	K12800	;ko04217 Necroptosis;ko04621 NOD-like receptor signaling pathway;ko04625 C-type lectin receptor signaling pathway;ko05130 Pathogenic Escherichia coli infection;ko05131 Shigellosis;ko05132 Salmonella infection;ko05133 Pertussis;ko05135 Yersinia infection;ko05164 Influenza A;ko05171 Coronavirus disease - COVID-19;
ENSDARG00000052734	4304	87	1.3	26	0.48	160	2.34	92	1.8	771	16.49	432	7.86	300.229	2.88081	0.881039	3.26979	0.00107628	0.999831	Ups	5	50972485	50992775	-	hmgcra	3-hydroxy-3-methylglutaryl-CoA reductase a [Source:ZFIN%3BAcc:ZDB-GENE-040401-2]	GO:0006695:cholesterol biosynthetic process;GO:0015936:coenzyme A metabolic process;GO:0008299:isoprenoid biosynthetic process;GO:1900222:negative regulation of beta-amyloid clearance;GO:0043407:negative regulation of MAP kinase activity;GO:0042177:negative regulation of protein catabolic process;GO:0050709:negative regulation of protein secretion;GO:0051262:protein tetramerization;GO:0016126:ste…	GO:0005789:endoplasmic reticulum membrane;GO:0016021:integral component of membrane;GO:0005778:peroxisomal membrane;	GO:0004420:hydroxymethylglutaryl-CoA reductase (NADPH) activity;GO:0042282:hydroxymethylglutaryl-CoA reductase activity;GO:0070402:NADPH binding;	K00021	;ko00900 Terpenoid backbone biosynthesis;ko01100 Metabolic pathways;ko01110 Biosynthesis of secondary metabolites;ko04152 AMPK signaling pathway;ko04976 Bile secretion;
ENSDARG00000060639	4425	54	0.78	6	0.11	730	10.39	14	0.27	2	0.04	17	0.3	109.018	-4.19643	1.29191	-3.24824	0.00116122	0.999831	Down	7	30787903	30915965	+	apba2b	amyloid beta (A4) precursor protein-binding%2C family A%2C member 2b [Source:ZFIN%3BAcc:ZDB-GENE-030131-5371]	GO:0007268:synaptic transmission;GO:0015031:protein transport;GO:0001701:in utero embryonic development;GO:0007626:locomotory behavior;GO:0035264:multicellular organism growth;GO:0007399:nervous system development;GO:0010468:regulation of gene expression;GO:2000300:regulation of synaptic vesicle exocytosis;	GO:0008021:synaptic vesicle;GO:0005737:cytoplasm;GO:0043197:dendritic spine;GO:0005886:plasma membrane;GO:0045202:synapse;	GO:0001540:beta-amyloid binding;GO:0042802:identical protein binding;	K04531	-
ENSDARG00000096576	2563	1	0.03	38	1.19	12	0.29	0	0	0	0	0	0	8.19951	-6.30539	1.94561	-3.24082	0.00119185	0.999831	Down	1	55279124	55287260	+	si:ch211-286b5.6	si:ch211-286b5.6 [Source:ZFIN%3BAcc:ZDB-GENE-121214-216]	-	-	-	K06467	;ko04514 Cell adhesion molecules;ko04640 Hematopoietic cell lineage;ko04662 B cell receptor signaling pathway;
ENSDARG00000053862	848	9	0.68	10	0.94	11	0.82	0	0	0	0	0	0	4.22862	-5.35316	1.68065	-3.18518	0.00144666	0.999831	Down	12	30838167	30841679	-	crygmx	crystallin%2C gamma MX [Source:ZFIN%3BAcc:ZDB-GENE-030131-7732]	-	-	GO:0005212:structural constituent of eye lens;	-	-
ENSDARG00000077219	3496	85	1.56	0	0	38	0.68	0	0	0	0	1	0.02	15.2633	-6.23528	1.95879	-3.18324	0.00145639	0.999831	Down	2	31614533	31626209	+	si:ch211-106h4.6	si:ch211-106h4.6 [Source:ZFIN%3BAcc:ZDB-GENE-070705-16]	-	GO:0016021:integral component of membrane;	-	-	-
ENSDARG00000034211	2597	1131	27.94	2521	77.63	24	0.58	6	0.19	117	4.15	34	1.02	603.121	-4.07215	1.28666	-3.16489	0.00155141	0.999831	Down	22	26443235	26476078	+	capn2l	calpain 2%2C (m/II) large subunit%2C like [Source:ZFIN%3BAcc:ZDB-GENE-050417-341]	GO:0048266:behavioral response to pain;GO:0001824:blastocyst development;GO:0071230:cellular response to amino acid stimulus;GO:0035458:cellular response to interferon-beta;GO:0071222:cellular response to lipopolysaccharide;GO:0022617:extracellular matrix disassembly;GO:0007565:female pregnancy;GO:0007520:myoblast fusion;GO:0010666:positive regulation of cardiac muscle cell apoptotic process;GO:1…	GO:0000785:chromatin;GO:0030864:cortical actin cytoskeleton;GO:0005737:cytoplasm;GO:0005829:cytosol;GO:0030425:dendrite;GO:0005783:endoplasmic reticulum;GO:0009897:external side of plasma membrane;GO:0070062:extracellular exosome;GO:0005925:focal adhesion;GO:0005794:Golgi apparatus;GO:0005764:lysosome;GO:0045121:membrane raft;GO:0005758:mitochondrial intermembrane space;GO:0043025:neuronal cell b…	GO:0005509:calcium ion binding;GO:0004198:calcium-dependent cysteine-type endopeptidase activity;GO:0008234:cysteine-type peptidase activity;GO:0008092:cytoskeletal protein binding;GO:0019899:enzyme binding;GO:0046982:protein heterodimerization activity;	K03853	;ko04141 Protein processing in endoplasmic reticulum;ko04210 Apoptosis;ko04217 Necroptosis;ko04218 Cellular senescence;ko04510 Focal adhesion;ko05010 Alzheimer disease;ko05022 Pathways of neurodegeneration - multiple diseases;ko05131 Shigellosis;
ENSDARG00000035797	1924	1	0.03	26	1.08	16	0.52	0	0	0	0	0	0	6.67174	-6.00796	1.91496	-3.13739	0.00170462	0.999831	Down	16	18142127	18153001	+	si:dkey-17m8.2	si:dkey-17m8.2 [Source:ZFIN%3BAcc:ZDB-GENE-110411-234]	-	-	-	-	-
ENSDARG00000060482	2363	73	1.98	26	0.88	44	1.17	6	0.21	5	0.19	8	0.26	22.4117	-2.44241	0.778782	-3.1362	0.00171155	0.999831	Down	9	53909566	54001502	-	mid1	midline 1 [Source:ZFIN%3BAcc:ZDB-GENE-110411-205]	GO:0060333:interferon-gamma-mediated signaling pathway;GO:0000226:microtubule cytoskeleton organization;GO:0007026:negative regulation of microtubule depolymerization;GO:0007389:pattern specification process;GO:0032874:positive regulation of stress-activated MAPK cascade;GO:0035372:protein localization to microtubule;	GO:0005829:cytosol;GO:0005874:microtubule;GO:0005875:microtubule associated complex;GO:0005819:spindle;	GO:0042802:identical protein binding;GO:0008017:microtubule binding;GO:0051219:phosphoprotein binding;GO:0046982:protein heterodimerization activity;GO:0042803:protein homodimerization activity;GO:0016740:transferase activity;GO:0031625:ubiquitin protein ligase binding;GO:0008270:zinc ion binding;	K08285	;ko04120 Ubiquitin mediated proteolysis;
ENSDARG00000012881	3556	19	0.34	51	1.15	15	0.27	49	1.16	218	5.64	175	3.85	99.8848	2.75328	0.879115	3.13188	0.0017369	0.999831	Ups	3	20065861	20092124	-	slc4a1a	solute carrier family 4 member 1a (Diego blood group) [Source:ZFIN%3BAcc:ZDB-GENE-010525-1]	GO:0015701:bicarbonate transport;	GO:0005887:integral component of plasma membrane;	GO:0015301:anion:anion antiporter activity;GO:0015106:bicarbonate transmembrane transporter activity;GO:0005452:inorganic anion exchanger activity;	K13855	;ko04970 Salivary secretion;ko04971 Gastric acid secretion;ko04972 Pancreatic secretion;ko04976 Bile secretion;
ENSDARG00000046091	2570	0	0	0	0	0	0	3	0.1	2	0.07	23	0.7	4.48142	5.8857	1.88111	3.12885	0.00175493	0.999831	Ups	5	4150814	4204601	-	si:ch211-283g2.1	si:ch211-283g2.1 [Source:ZFIN%3BAcc:ZDB-GENE-060531-57]	-	-	-	K05039	-
ENSDARG00000060610	5325	43	0.52	26	0.39	192	2.27	3	0.05	10	0.17	8	0.12	38.9286	-3.09819	0.995551	-3.11204	0.001858	0.999831	Down	7	63324888	63570206	+	pcdh7b	protocadherin 7b [Source:ZFIN%3BAcc:ZDB-GENE-081104-299]	GO:0007155:cell adhesion;GO:0007156:homophilic cell adhesion via plasma membrane adhesion molecules;GO:0002576:platelet degranulation;	GO:0005887:integral component of plasma membrane;GO:0005886:plasma membrane;GO:0031092:platelet alpha granule membrane;	GO:0005509:calcium ion binding;	K16498	-
ENSDARG00000045563	2256	247	7.02	150	5.32	183	5.11	316	11.8	263	10.73	485	16.82	272.362	1.28813	0.415729	3.09847	0.00194521	0.999831	Ups	4	17655872	17662078	+	washc3	WASH complex subunit 3 [Source:NCBI gene%3BAcc:393142]	GO:0030041:actin filament polymerization;GO:0006887:exocytosis;	GO:0071203:WASH complex;	-	K18463	;ko04144 Endocytosis;ko04212 Longevity regulating pathway - worm;
ENSDARG00000101930	894	32	2.3	70	6.26	40	2.82	8	0.75	3	0.31	7	0.61	24.279	-2.68639	0.868026	-3.09483	0.00196925	0.999831	Down	12	43692048	43693192	-	CU914622.1	-	-	-	-	-	-
ENSDARG00000097434	916	2	0.14	1	0.09	3	0.21	24	2.21	9	0.9	11	0.94	8.99835	3.33048	1.09067	3.05361	0.00226106	0.999831	Ups	4	18419542	18434077	+	BX649398.2	-	-	-	-	-	-
ENSDARG00000094458	832	104	8.02	0	0	75	5.67	1	0.1	2	0.22	0	0	22.8958	-5.17082	1.69893	-3.04357	0.00233785	0.999831	Down	5	41857450	41860556	-	si:dkey-65b12.12	si:dkey-65b12.12 [Source:ZFIN%3BAcc:ZDB-GENE-060526-325]	-	-	-	-	-
ENSDARG00000016421	606	12	1.27	11	1.45	5	0.52	0	0	0	0	0	0	3.96812	-5.26037	1.73435	-3.03305	0.00242093	0.999831	Down	9	22011912	22012819	+	crygm1	crystallin%2C gamma M1 [Source:ZFIN%3BAcc:ZDB-GENE-050516-5]	-	-	GO:0005212:structural constituent of eye lens;	-	-
ENSDARG00000074210	973	1	0.07	4	0.33	3	0.19	39	3.38	12	1.14	11	0.88	12.8597	3.32675	1.09753	3.03113	0.00243643	0.999831	Ups	11	42478184	42481817	+	zgc:110286	zgc:110286 [Source:ZFIN%3BAcc:ZDB-GENE-050417-68]	GO:0006893:Golgi to plasma membrane transport;GO:0006886:intracellular protein transport;GO:0006890:retrograde vesicle-mediated transport, Golgi to ER;GO:0016192:vesicle-mediated transport;	GO:0005737:cytoplasm;GO:0005794:Golgi apparatus;GO:0005886:plasma membrane;	GO:0005525:GTP binding;	-	-
ENSDARG00000098779	4302	38	0.57	120	2.23	1	0.01	0	0	3	0.06	0	0	25.9009	-5.26475	1.7402	-3.02537	0.00248333	0.999831	Down	20	12830448	12834749	+	BX547930.4	-	-	-	-	-	-
ENSDARG00000100311	4316	198	2.94	21	0.39	159	2.32	0	0	14	0.3	4	0.07	51.9796	-3.65147	1.2153	-3.00457	0.00265953	0.999831	Down	4	51542447	51598177	+	si:dkey-165e24.1	si:dkey-165e24.1 [Source:ZFIN%3BAcc:ZDB-GENE-081103-19]	GO:0071345:cellular response to cytokine stimulus;GO:0036336:dendritic cell migration;GO:0050710:negative regulation of cytokine secretion;GO:0070373:negative regulation of ERK1 and ERK2 cascade;GO:0043124:negative regulation of I-kappaB kinase/NF-kappaB signaling;GO:0050728:negative regulation of inflammatory response;GO:0050711:negative regulation of interleukin-1 secretion;GO:0045409:negative …	GO:0005737:cytoplasm;	GO:0005524:ATP binding;	K12800	;ko04217 Necroptosis;ko04621 NOD-like receptor signaling pathway;ko04625 C-type lectin receptor signaling pathway;ko05130 Pathogenic Escherichia coli infection;ko05131 Shigellosis;ko05132 Salmonella infection;ko05133 Pertussis;ko05135 Yersinia infection;ko05164 Influenza A;ko05171 Coronavirus disease - COVID-19;
ENSDARG00000088245	3738	0	0	7	0.15	6	0.1	1	0.02	211	5.2	21	0.44	55.2879	4.7609	1.58506	3.00361	0.00266795	0.999831	Ups	4	32772213	32783867	+	si:dkey-16p6.1	si:dkey-16p6.1 [Source:ZFIN%3BAcc:ZDB-GENE-081103-43]	-	-	-	K12800	;ko04217 Necroptosis;ko04621 NOD-like receptor signaling pathway;ko04625 C-type lectin receptor signaling pathway;ko05130 Pathogenic Escherichia coli infection;ko05131 Shigellosis;ko05132 Salmonella infection;ko05133 Pertussis;ko05135 Yersinia infection;ko05164 Influenza A;ko05171 Coronavirus disease - COVID-19;
ENSDARG00000042992	1085	31	1.83	13	0.96	12	0.7	0	0	0	0	2	0.14	7.79275	-4.43732	1.47767	-3.00292	0.00267399	0.999831	Down	22	11710467	11714158	-	crygs1	crystallin%2C gamma S1 [Source:ZFIN%3BAcc:ZDB-GENE-050223-4]	-	-	GO:0005212:structural constituent of eye lens;	-	-
ENSDARG00000090551	3050	0	0	1	0.03	0	0	0	0	24	0.72	20	0.51	8.85963	5.85869	1.95869	2.99112	0.00277952	0.999831	Ups	3	866044	873695	+	FP102786.1	GTPase IMAP family member 8-like [Source:NCBI gene%3BAcc:101882698]	-	-	-	-	-
ENSDARG00000096644	1948	2	0.07	38	1.56	58	1.87	0	0	0	0	3	0.12	14.8163	-4.85394	1.62359	-2.98964	0.00279303	0.999831	Down	1	55608520	55617155	+	adgre18	adhesion G protein-coupled receptor E18 [Source:ZFIN%3BAcc:ZDB-GENE-121214-32]	-	-	-	K04591	-
ENSDARG00000096687	1245	6	0.31	2	0.13	61	3.08	0	0	0	0	1	0.06	9.22549	-5.49942	1.84834	-2.97533	0.00292678	0.999831	Down	12	47573586	47601845	-	rgs7b	regulator of G protein signaling 7b [Source:ZFIN%3BAcc:ZDB-GENE-130531-78]	GO:0007186:G-protein coupled receptor signaling pathway;GO:0035556:intracellular signal transduction;GO:0009968:negative regulation of signal transduction;	GO:0005829:cytosol;GO:0005886:plasma membrane;	GO:0031681:G-protein beta-subunit binding;GO:0005096:GTPase activator activity;	K16449	-
ENSDARG00000079727	1603	4	0.16	3	0.15	2	0.08	55	2.89	2	0.11	24	1.17	15.4405	3.51309	1.19678	2.93545	0.00333061	0.999831	Ups	2	27394798	27401105	+	selenop2	Danio rerio selenoprotein P2 (selenop2)%2C mRNA. [Source:RefSeq mRNA%3BAcc:NM_001353911]	GO:0010269:response to selenium ion;GO:0001887:selenium compound metabolic process;	GO:0005615:extracellular space;	GO:0008430:selenium binding;	-	-
ENSDARG00000074275	3880	153	2.53	55	1.13	106	1.72	394	8.55	106	2.52	294	5.93	183.249	1.76825	0.603361	2.93066	0.00338243	0.999831	Ups	1	18965750	19066327	+	limch1a	LIM and calponin homology domains 1a [Source:ZFIN%3BAcc:ZDB-GENE-090312-153]	GO:0031032:actomyosin structure organization;GO:0030336:negative regulation of cell migration;GO:0001934:positive regulation of protein phosphorylation;GO:0051496:positive regulation of stress fiber assembly;GO:0051893:regulation of focal adhesion assembly;	GO:0005737:cytoplasm;GO:0001725:stress fiber;	GO:0003779:actin binding;GO:0046872:metal ion binding;	-	-
ENSDARG00000114741	582	0	0	0	0	0	0	0	0	23	3.64	6	0.81	6.34774	6.36261	2.17319	2.92778	0.00341394	0.999831	Ups	11	20953926	20956309	-	CABZ01008739.1	-	-	-	-	-	-
ENSDARG00000075134	2850	0	0	0	0	0	0	14	0.41	5	0.16	1	0.03	3.90706	5.66671	1.93655	2.92618	0.00343148	0.999831	Ups	20	35517572	35536676	-	adgrf11	adhesion G protein-coupled receptor F11 [Source:ZFIN%3BAcc:ZDB-GENE-121214-165]	-	-	-	K08458	-
ENSDARG00000088643	1272	1	0.05	1	0.06	5	0.25	6	0.4	12	0.87	43	2.65	11.3537	3.45279	1.18428	2.91551	0.00355107	0.999831	Ups	12	46512881	46540171	+	CU855711.1	legumain-like [Source:NCBI gene%3BAcc:108191752]	-	-	-	K01369	;ko04142 Lysosome;ko04612 Antigen processing and presentation;
ENSDARG00000095493	809	0	0	0	0	0	0	33	3.44	3	0.34	0	0	6.77495	6.46634	2.22078	2.91175	0.0035941	0.999831	Ups	22	4783644	4784658	-	CU570881.1	-	-	-	-	-	-
ENSDARG00000086612	526	0	0	0	0	0	0	0	0	28	4.9	3	0.45	7.08081	6.52037	2.24075	2.9099	0.00361539	0.999831	Ups	21	45238533	45242534	+	si:ch73-269m14.4	si:ch73-269m14.4 [Source:ZFIN%3BAcc:ZDB-GENE-120215-94]	-	-	-	-	-
ENSDARG00000110812	312	11	2.26	0	0	49	9.89	0	0	0	0	0	0	7.75065	-6.23352	2.14358	-2.908	0.00363752	0.999831	Down	25	35125713	35126024	-	hist1h4l	histone 1%2C H4%2C like [Source:ZFIN%3BAcc:ZDB-GENE-070927-10]	GO:0006352:DNA-templated transcription, initiation;	GO:0000786:nucleosome;GO:0005634:nucleus;	GO:0003677:DNA binding;GO:0046982:protein heterodimerization activity;	K11254	;ko04613 Neutrophil extracellular trap formation;ko05034 Alcoholism;ko05203 Viral carcinogenesis;ko05322 Systemic lupus erythematosus;
ENSDARG00000078519	2626	0	0	0	0	0	0	17	0.55	0	0	13	0.39	5.07787	6.0576	2.0852	2.90505	0.00367196	0.999831	Ups	22	4884980	4892937	-	si:ch73-256j6.4	si:ch73-256j6.4 [Source:ZFIN%3BAcc:ZDB-GENE-030131-3779]	-	-	-	-	-
ENSDARG00000108332	1563	0	0	0	0	0	0	0	0	13	0.77	14	0.7	5.18217	6.07536	2.11236	2.8761	0.00402621	0.999831	Ups	22	8959490	8966295	-	FO393424.1	transmembrane and immunoglobulin domain-containing protein 1-like [Source:NCBI gene%3BAcc:103909548]	-	-	-	-	-
ENSDARG00000095808	2215	0	0	69	2.49	9	0.26	1	0.04	0	0	0	0	13.175	-6.01007	2.09077	-2.87458	0.0040457	0.999831	Down	16	6588022	6591170	-	BX470242.1	-	-	-	-	-	-
ENSDARG00000117097	600	19	2.03	9	1.2	2	0.21	0	0	0	0	0	0	4.06472	-5.30045	1.84432	-2.87393	0.00405402	0.999831	Down	9	22022105	22023061	-	crygm2c	crystallin%2C gamma M2c [Source:ZFIN%3BAcc:ZDB-GENE-050516-11]	-	-	GO:0005212:structural constituent of eye lens;	-	-
ENSDARG00000097700	4094	44	0.69	288	5.63	6	0.09	1	0.02	8	0.18	13	0.25	59.3439	-3.77798	1.31706	-2.86849	0.00412436	0.999831	Down	15	36329368	36347895	-	si:dkey-23k10.2	si:dkey-23k10.2 [Source:ZFIN%3BAcc:ZDB-GENE-131122-52]	-	-	-	K12800	;ko04217 Necroptosis;ko04621 NOD-like receptor signaling pathway;ko04625 C-type lectin receptor signaling pathway;ko05130 Pathogenic Escherichia coli infection;ko05131 Shigellosis;ko05132 Salmonella infection;ko05133 Pertussis;ko05135 Yersinia infection;ko05164 Influenza A;ko05171 Coronavirus disease - COVID-19;
ENSDARG00000002259	1675	2	0.08	2	0.1	6	0.23	19	0.96	16	0.88	15	0.7	10.9036	2.79078	0.97336	2.86716	0.00414174	0.999831	Ups	12	4338298	4346085	-	ca15c	carbonic anhydrase XV c [Source:ZFIN%3BAcc:ZDB-GENE-061013-737]	-	-	-	-	-
ENSDARG00000113271	62	0	0	0	0	0	0	13	17.66	0	0	16	20.2	4.79362	5.97652	2.08517	2.86621	0.00415422	0.999831	Ups	15	425695	425756	-	CABZ01056628.1	-	-	-	-	-	-
ENSDARG00000002377	3021	390	8.28	238	6.3	654	13.63	143	3.99	65	1.98	113	2.93	231.777	-1.56113	0.546181	-2.85827	0.00425961	0.999831	Down	1	8521323	8532009	+	mief2	mitochondrial elongation factor 2 [Source:ZFIN%3BAcc:ZDB-GENE-060929-864]	-	-	-	-	-
ENSDARG00000100240	971	0	0	0	0	0	0	0	0	33	3.13	1	0.08	7.96417	6.69129	2.3462	2.85198	0.00434484	0.999831	Ups	4	71154171	71155563	+	CT737123.1	-	-	-	-	-	-
ENSDARG00000078429	4453	0	0	0	0	0	0	7	0.13	3	0.06	5	0.09	2.7482	5.16633	1.8151	2.84631	0.00442295	0.999831	Ups	22	24784013	24791505	-	vtg4	vitellogenin 4 [Source:ZFIN%3BAcc:ZDB-GENE-001201-3]	GO:0034605:cellular response to heat;GO:0032355:response to estradiol;GO:0032868:response to insulin;GO:1903165:response to polycyclic arene;	GO:0005829:cytosol;GO:0005615:extracellular space;GO:0060417:yolk;	GO:0005319:lipid transporter activity;GO:0045735:nutrient reservoir activity;GO:0005102:receptor binding;	-	-
ENSDARG00000116193	1992	1791	57.68	6	0.24	1974	62.39	137	5.79	3	0.14	57	2.24	508.16	-3.78001	1.33147	-2.83897	0.00452599	0.999831	Down	11	18183220	18200701	+	LO018315.6	uncharacterized LOC100334068 [Source:NCBI gene%3BAcc:100334068]	-	-	-	-	-
ENSDARG00000056210	2020	170	5.4	159	6.3	91	2.84	29	1.21	8	0.36	47	1.82	73.695	-2.04276	0.721178	-2.83253	0.00461807	0.999831	Down	8	24968098	24970790	-	hspa1b	heat shock protein family A (Hsp70) member 1B [Source:ZFIN%3BAcc:ZDB-GENE-060503-867]	-	GO:0005737:cytoplasm;GO:0005634:nucleus;	GO:0005524:ATP binding;	K03283	;ko03040 Spliceosome;ko04010 MAPK signaling pathway;ko04141 Protein processing in endoplasmic reticulum;ko04144 Endocytosis;ko04213 Longevity regulating pathway - multiple species;ko04612 Antigen processing and presentation;ko04915 Estrogen signaling pathway;ko05020 Prion disease;ko05134 Legionellosis;ko05145 Toxoplasmosis;ko05162 Measles;
ENSDARG00000116570	1489	1	0.04	0	0	1	0.04	53	3	1	0.06	1	0.05	10.3777	5.26921	1.86578	2.82414	0.00474078	0.999831	Ups	17	50052174	50054025	-	FO834825.3	-	-	GO:0005634:nucleus;	GO:0003677:DNA binding;GO:0000981:sequence-specific DNA binding RNA polymerase II transcription factor activity;GO:0046872:metal ion binding;	K09228	;ko05168 Herpes simplex virus 1 infection;
ENSDARG00000103764	495	1	0.13	1	0.16	0	0	11	1.87	0	0	48	7.59	9.5253	5.04477	1.78811	2.82128	0.00478318	0.999831	Ups	5	7989210	7995799	+	gdnfb	glial cell derived neurotrophic factor b [Source:ZFIN%3BAcc:ZDB-GENE-110609-2]	GO:0001658:branching involved in ureteric bud morphogenesis;GO:0048484:enteric nervous system development;GO:0001656:metanephros development;GO:0048255:mRNA stabilization;GO:0043524:negative regulation of neuron apoptotic process;GO:0001755:neural crest cell migration;GO:0031175:neuron projection development;GO:0007422:peripheral nervous system development;GO:0030432:peristalsis;GO:0090190:positi…	GO:0005576:extracellular region;GO:0005615:extracellular space;	GO:0008083:growth factor activity;GO:0004709:MAP kinase kinase kinase activity;GO:0046983:protein dimerization activity;GO:0042803:protein homodimerization activity;	-	-
ENSDARG00000092976	5609	14	0.16	7	0.1	17	0.19	33	0.5	38	0.62	39	0.54	26.0226	2.02495	0.720756	2.80949	0.00496208	0.999831	Ups	10	19427474	19523752	-	si:ch211-127i16.2	si:ch211-127i16.2 [Source:ZFIN%3BAcc:ZDB-GENE-091204-54]	-	-	-	K00274	;ko00260 Glycine, serine and threonine metabolism;ko00330 Arginine and proline metabolism;ko00340 Histidine metabolism;ko00350 Tyrosine metabolism;ko00360 Phenylalanine metabolism;ko00380 Tryptophan metabolism;ko00950 Isoquinoline alkaloid biosynthesis;ko00982 Drug metabolism - cytochrome P450;ko01100 Metabolic pathways;ko01110 Biosynthesis of secondary metabolites;ko04726 Serotonergic synapse;ko…
ENSDARG00000053493	3734	149	2.56	27	0.58	171	2.88	14	0.32	6	0.15	31	0.65	53.4875	-2.36112	0.847283	-2.7867	0.00532485	0.999831	Down	7	30326184	30367650	-	aldh1a2	aldehyde dehydrogenase 1 family%2C member A2 [Source:ZFIN%3BAcc:ZDB-GENE-011010-3]	GO:0042904:9-cis-retinoic acid biosynthetic process;GO:0001568:blood vessel development;GO:0048738:cardiac muscle tissue development;GO:0071300:cellular response to retinoic acid;GO:0009855:determination of bilateral symmetry;GO:0031076:embryonic camera-type eye development;GO:0048566:embryonic digestive tract development;GO:0035115:embryonic forelimb morphogenesis;GO:0060324:face development;GO:…	GO:0005737:cytoplasm;GO:0005829:cytosol;GO:0048471:perinuclear region of cytoplasm;	GO:0004028:3-chloroallyl aldehyde dehydrogenase activity;GO:0004029:aldehyde dehydrogenase (NAD) activity;GO:0016918:retinal binding;GO:0001758:retinal dehydrogenase activity;	K07249	;ko00830 Retinol metabolism;ko01100 Metabolic pathways;
ENSDARG00000114124	906	0	0	0	0	0	0	0	0	21	2.13	4	0.35	5.57361	6.17333	2.21529	2.78669	0.00532488	0.999831	Ups	4	37710093	37715686	+	si:dkey-3p4.8	si:dkey-3p4.8 [Source:ZFIN%3BAcc:ZDB-GENE-120215-16]	-	GO:0005634:nucleus;	GO:0003677:DNA binding;GO:0046872:metal ion binding;	K09228	;ko05168 Herpes simplex virus 1 infection;
ENSDARG00000007682	1309	247	12.11	236	14.42	320	15.39	106	6.82	2395	168.46	778	46.51	815.353	2.65277	0.954992	2.77779	0.00547305	0.999831	Ups	8	23213320	23216035	+	ppdpfa	pancreatic progenitor cell differentiation and proliferation factor a [Source:NCBI gene%3BAcc:338304]	GO:0001708:cell fate specification;GO:0008283:cell proliferation;GO:0031017:exocrine pancreas development;	-	-	-	-
ENSDARG00000057789	603	9	0.96	8	1.06	1	0.1	15	2.1	25	3.82	58	7.53	19.9645	2.77389	0.999713	2.77469	0.00552548	0.999831	Ups	24	24035863	24038800	-	lyz	lysozyme [Source:ZFIN%3BAcc:ZDB-GENE-020515-2]	-	-	-	K01185	-
ENSDARG00000095200	4453	8	0.12	34	0.61	257	3.63	2	0.04	10	0.21	8	0.14	44.4923	-3.37931	1.21967	-2.77068	0.00559388	0.999831	Down	4	49765093	49808690	-	si:ch211-197e7.1	si:ch211-197e7.1 [Source:ZFIN%3BAcc:ZDB-GENE-081103-26]	-	-	-	K12800	;ko04217 Necroptosis;ko04621 NOD-like receptor signaling pathway;ko04625 C-type lectin receptor signaling pathway;ko05130 Pathogenic Escherichia coli infection;ko05131 Shigellosis;ko05132 Salmonella infection;ko05133 Pertussis;ko05135 Yersinia infection;ko05164 Influenza A;ko05171 Coronavirus disease - COVID-19;
ENSDARG00000042396	5217	19	0.23	2	0.03	2	0.02	149	2.41	3	0.05	41	0.62	37.1213	3.56337	1.28696	2.76884	0.00562567	0.999831	Ups	18	7611298	7622892	+	odf3b	tripartite motif containing 35-30 [Source:ZFIN%3BAcc:ZDB-GENE-060503-557]	-	GO:0005737:cytoplasm;	-	-	-
ENSDARG00000093719	485	7	0.93	36	5.94	8	1.04	0	0	0	0	2	0.32	8.34619	-4.55056	1.64688	-2.76313	0.00572496	0.999831	Down	5	21258218	21259238	+	BX470224.3	-	-	-	-	-	-
ENSDARG00000035820	1180	1	0.05	2	0.14	3	0.16	19	1.36	9	0.7	9	0.6	7.83101	3.04834	1.1063	2.75543	0.00586156	0.999831	Ups	7	57432318	57470497	+	drd4b	dopamine receptor D4b [Source:ZFIN%3BAcc:ZDB-GENE-070508-3]	GO:0000187:activation of MAPK activity;GO:0007195:adenylate cyclase-inhibiting dopamine receptor signaling pathway;GO:0008344:adult locomotory behavior;GO:0050482:arachidonic acid secretion;GO:0001662:behavioral fear response;GO:0048148:behavioral response to cocaine;GO:0048149:behavioral response to ethanol;GO:0006874:cellular calcium ion homeostasis;GO:0007268:synaptic transmission;GO:0042417:d…	GO:0030425:dendrite;GO:0005887:integral component of plasma membrane;GO:0016020:membrane;GO:0005886:plasma membrane;GO:0098794:postsynapse;GO:0030424:axon;GO:0043679:axon terminus;GO:0005938:cell cortex;GO:0005737:cytoplasm;GO:0043197:dendritic spine;GO:0043025:neuronal cell body;GO:0043195:terminal bouton;GO:0012506:vesicle membrane;	GO:0035240:dopamine binding;GO:0004952:dopamine neurotransmitter receptor activity;GO:0001591:dopamine neurotransmitter receptor activity, coupled via Gi/Go;GO:0008144:drug binding;GO:0051379:epinephrine binding;GO:0004930:G-protein coupled receptor activity;GO:0004993:serotonin receptor activity;GO:0042802:identical protein binding;GO:0046872:metal ion binding;GO:0030594:neurotransmitter recepto…	K04147	;ko04080 Neuroactive ligand-receptor interaction;ko04728 Dopaminergic synapse;
ENSDARG00000104823	1938	23	0.76	6	0.25	14	0.45	5	0.22	99	4.7	122	4.93	48.3	2.92111	1.06084	2.75359	0.00589464	0.999831	Ups	6	23887314	23889678	+	znf648	zinc finger protein 648 [Source:ZFIN%3BAcc:ZDB-GENE-120215-149]	GO:0006355:regulation of transcription, DNA-templated;	GO:0005634:nucleus;	GO:0003677:DNA binding;GO:0003700:sequence-specific DNA binding transcription factor activity;GO:0000981:sequence-specific DNA binding RNA polymerase II transcription factor activity;GO:0046872:metal ion binding;	-	-
ENSDARG00000076787	2271	27	0.76	5	0.18	14	0.39	1	0.04	0	0	1	0.03	6.24396	-4.05507	1.47681	-2.74584	0.00603561	0.999831	Down	6	51932267	52030817	+	angpt4	angiopoietin 4 [Source:ZFIN%3BAcc:ZDB-GENE-110104-1]	GO:0007171:activation of transmembrane receptor protein tyrosine kinase activity;GO:0030154:cell differentiation;GO:0031589:cell-substrate adhesion;GO:0072012:glomerulus vasculature development;GO:0030097:hemopoiesis;GO:0030210:heparin biosynthetic process;GO:0001701:in utero embryonic development;GO:0050900:leukocyte migration;GO:0000165:MAPK cascade;GO:0043066:negative regulation of apoptotic p…	GO:0070062:extracellular exosome;GO:0005576:extracellular region;GO:0005615:extracellular space;GO:0045121:membrane raft;GO:0005902:microvillus;GO:0005886:plasma membrane;	GO:0030971:receptor tyrosine kinase binding;	K05465	;ko04010 MAPK signaling pathway;ko04014 Ras signaling pathway;ko04015 Rap1 signaling pathway;ko04066 HIF-1 signaling pathway;ko04151 PI3K-Akt signaling pathway;ko05323 Rheumatoid arthritis;
ENSDARG00000076221	889	13	0.94	46	4.14	21	1.49	332	31.46	28	2.9	72	6.34	90.6439	2.69541	0.992265	2.71643	0.00659907	0.999831	Ups	3	32105175	32106672	+	fthl28	ferritin%2C heavy polypeptide-like 28 [Source:ZFIN%3BAcc:ZDB-GENE-030131-7540]	GO:0006879:cellular iron ion homeostasis;GO:0006826:iron ion transport;	GO:0005623:cell;	GO:0008199:ferric iron binding;GO:0004322:ferroxidase activity;	K00522	;ko04216 Ferroptosis;ko04217 Necroptosis;ko04978 Mineral absorption;
ENSDARG00000094083	574	11	1.23	0	0	34	3.73	0	0	0	0	0	0	5.77882	-5.81109	2.14472	-2.70948	0.0067388	0.999831	Down	2	25158342	25159309	-	si:dkey-223d7.6	si:dkey-223d7.6 [Source:ZFIN%3BAcc:ZDB-GENE-070912-450]	-	-	-	-	-
ENSDARG00000059965	6850	298	2.79	142	1.66	196	1.8	32	0.39	34	0.46	96	1.1	113.896	-1.58836	0.591017	-2.68751	0.00719873	0.999831	Down	2	45300512	45376408	+	camsap2b	calmodulin regulated spectrin-associated protein family%2C member 2b [Source:ZFIN%3BAcc:ZDB-GENE-070912-80]	GO:0061564:axon development;GO:0031122:cytoplasmic microtubule organization;GO:0000226:microtubule cytoskeleton organization;GO:0007026:negative regulation of microtubule depolymerization;GO:0050773:regulation of dendrite development;GO:1903358:regulation of Golgi organization;GO:0031113:regulation of microtubule polymerization;GO:0033043:regulation of organelle organization;	GO:0005829:cytosol;GO:0005794:Golgi apparatus;GO:1990752:microtubule end;GO:0036449:microtubule minus-end;	GO:0005516:calmodulin binding;GO:0051011:microtubule minus-end binding;GO:0030507:spectrin binding;	K17493	-
ENSDARG00000039131	3267	25	0.49	33	0.81	14	0.27	54	1.39	97	2.73	64	1.53	52.9736	2.02724	0.755486	2.68336	0.00728855	0.999831	Ups	1	1805294	1815660	+	atp1a1a.3	ATPase Na+/K+ transporting subunit alpha 1a%2C tandem duplicate 3 [Source:ZFIN%3BAcc:ZDB-GENE-001212-3]	GO:0006814:sodium ion transport;	GO:0016021:integral component of membrane;GO:0005886:plasma membrane;GO:0042383:sarcolemma;	GO:0005524:ATP binding;GO:0046872:metal ion binding;GO:0008556:potassium-transporting ATPase activity;	K01539	;ko04022 cGMP-PKG signaling pathway;ko04024 cAMP signaling pathway;ko04260 Cardiac muscle contraction;ko04261 Adrenergic signaling in cardiomyocytes;ko04911 Insulin secretion;ko04918 Thyroid hormone synthesis;ko04919 Thyroid hormone signaling pathway;ko04925 Aldosterone synthesis and secretion;ko04960 Aldosterone-regulated sodium reabsorption;ko04961 Endocrine and other factor-regulated calcium r…
ENSDARG00000002037	3249	63	1.24	48	1.18	56	1.09	212	5.5	80	2.27	97	2.34	95.5555	1.6518	0.616294	2.68021	0.00735766	0.999831	Ups	11	18784847	18800299	-	pfkfb2b	6-phosphofructo-2-kinase/fructose-2%2C6-biphosphatase 2b [Source:ZFIN%3BAcc:ZDB-GENE-120222-1]	GO:0006003:fructose 2,6-bisphosphate metabolic process;GO:0006000:fructose metabolic process;GO:0006007:glucose catabolic process;GO:0006096:glycolytic process;GO:0006089:lactate metabolic process;GO:0033133:positive regulation of glucokinase activity;GO:0045821:positive regulation of glycolytic process;GO:0032024:positive regulation of insulin secretion;GO:0009749:response to glucose;	GO:0005829:cytosol;GO:0005654:nucleoplasm;GO:0005634:nucleus;	GO:0003873:6-phosphofructo-2-kinase activity;GO:0005524:ATP binding;GO:0004331:fructose-2,6-bisphosphate 2-phosphatase activity;GO:0019901:protein kinase binding;	K19029	;ko00051 Fructose and mannose metabolism;ko01100 Metabolic pathways;ko04152 AMPK signaling pathway;ko04919 Thyroid hormone signaling pathway;
ENSDARG00000086691	706	15	1.36	12	1.36	5	0.45	13	1.55	29	3.78	113	12.53	30.7342	2.55422	0.953036	2.68008	0.00736037	0.999831	Ups	13	50368668	50373021	+	dnajc12	DnaJ (Hsp40) homolog%2C subfamily C%2C member 12 [Source:ZFIN%3BAcc:ZDB-GENE-070801-3]	-	GO:0005737:cytoplasm;	-	K09532	-
ENSDARG00000094760	2957	66	1.43	62	1.68	83	1.77	52	1.48	364	11.33	214	5.66	157.284	2.12138	0.794287	2.6708	0.00756713	0.999831	Ups	5	23256187	23266238	+	si:dkey-125i10.3	si:dkey-125i10.3 [Source:ZFIN%3BAcc:ZDB-GENE-060526-198]	-	-	-	-	-
ENSDARG00000094480	701	2	0.18	0	0	0	0	3	0.36	28	3.68	2	0.22	7.71992	4.84991	1.81629	2.67022	0.00758008	0.999831	Ups	2	10386479	10416272	+	BX927121.1	-	-	-	-	-	-
ENSDARG00000104576	2840	5	0.11	84	2.37	7	0.16	2	0.06	2	0.06	3	0.08	17.1824	-3.61647	1.35672	-2.66559	0.00768535	0.999831	Down	24	2826210	2829049	-	-	si:ch211-152c8.5 [Source:ZFIN%3BAcc:ZDB-GENE-030131-5764]	-	-	-	-	-
ENSDARG00000077115	4342	0	0	23	0.42	121	1.75	2	0.04	2	0.04	0	0	20.6832	-4.61091	1.73196	-2.66224	0.00776214	0.999831	Down	22	7758462	7809981	-	si:ch73-44m9.1	si:ch73-44m9.1 [Source:ZFIN%3BAcc:ZDB-GENE-081104-289]	-	-	-	-	-
ENSDARG00000068006	2973	95	2.05	2	0.05	49	1.04	3	0.08	0	0	6	0.16	19.5447	-3.59071	1.35341	-2.65309	0.00797598	0.999831	Down	8	40476811	40490593	+	gck	glucokinase (hexokinase 4) [Source:ZFIN%3BAcc:ZDB-GENE-060825-204]	GO:0008637:apoptotic mitochondrial changes;GO:0061621:canonical glycolysis;GO:0001678:cellular glucose homeostasis;GO:0072655:establishment of protein localization to mitochondrion;GO:0006096:glycolytic process;GO:0007595:lactation;GO:0072656:maintenance of protein location in mitochondrion;GO:0035795:negative regulation of mitochondrial membrane permeability;GO:2000378:negative regulation of rea…	GO:0005829:cytosol;GO:0016020:membrane;GO:0005741:mitochondrial outer membrane;GO:0005886:plasma membrane;GO:0016529:sarcoplasmic reticulum;GO:0005739:mitochondrion;GO:0005654:nucleoplasm;	GO:0005524:ATP binding;GO:0008865:fructokinase activity;GO:0004340:glucokinase activity;GO:0005536:glucose binding;GO:0004396:hexokinase activity;GO:0019158:mannokinase activity;	K12407	;ko00010 Glycolysis / Gluconeogenesis;ko00052 Galactose metabolism;ko00500 Starch and sucrose metabolism;ko00520 Amino sugar and nucleotide sugar metabolism;ko00521 Streptomycin biosynthesis;ko00524 Neomycin, kanamycin and gentamicin biosynthesis;ko01100 Metabolic pathways;ko01110 Biosynthesis of secondary metabolites;ko01120 Microbial metabolism in diverse environments;ko01200 Carbon metabolism;…
ENSDARG00000033684	1290	17	0.85	37	2.29	47	2.29	2	0.13	6	0.43	5	0.3	17.0735	-2.54223	0.958655	-2.65187	0.00800481	0.999831	Down	1	2048047	2051599	-	oxgr1a.1	oxoglutarate (alpha-ketoglutarate) receptor 1a%2C tandem duplicate 1 [Source:ZFIN%3BAcc:ZDB-GENE-060421-6734]	-	-	-	K08419	-
ENSDARG00000095820	641	150	15.01	353	44.04	111	10.9	7	0.92	30	4.31	66	8.06	111.165	-2.33955	0.887799	-2.63523	0.00840814	0.999831	Down	22	11097512	11098318	+	BX649485.4	-	-	-	-	-	-
ENSDARG00000095522	1174	0	0	0	0	0	0	8	0.57	11	0.86	0	0	4.07483	5.72087	2.17762	2.62712	0.00861118	0.999831	Ups	16	22015648	22022456	-	si:dkey-71b5.3	si:dkey-71b5.3 [Source:ZFIN%3BAcc:ZDB-GENE-100922-91]	-	-	-	-	-
ENSDARG00000013794	2064	130	4.04	81	3.14	141	4.3	93	3.8	654	29.17	234	8.87	254.986	2.11165	0.804132	2.62601	0.00863934	0.999831	Ups	17	32365941	32370047	-	klf11b	Kruppel-like factor 11b [Source:ZFIN%3BAcc:ZDB-GENE-061103-82]	GO:0006915:apoptotic process;GO:1901653:cellular response to peptide;GO:0008285:negative regulation of cell proliferation;GO:0000122:negative regulation of transcription from RNA polymerase II promoter;GO:0045892:negative regulation of transcription, DNA-templated;GO:0043065:positive regulation of apoptotic process;GO:0006357:regulation of transcription from RNA polymerase II promoter;GO:0000083:…	GO:0005829:cytosol;GO:0005925:focal adhesion;GO:0016604:nuclear body;GO:0005654:nucleoplasm;GO:0005634:nucleus;	GO:0003677:DNA binding;GO:0003700:sequence-specific DNA binding transcription factor activity;GO:0000981:sequence-specific DNA binding RNA polymerase II transcription factor activity;GO:0046872:metal ion binding;GO:0044212:transcription regulatory region DNA binding;	K09209	-
ENSDARG00000033029	11674	1	0.01	1	0.01	2	0.01	6	0.04	8	0.06	13	0.09	5.50369	3.16603	1.20632	2.62453	0.00867684	0.999831	Ups	12	21697540	21748008	+	pkd1b	polycystic kidney disease 1b [Source:ZFIN%3BAcc:ZDB-GENE-100707-2]	-	-	-	K04985	-
ENSDARG00000040736	860	10	0.75	5	0.46	5	0.37	0	0	0	0	0	0	2.70326	-4.71357	1.79701	-2.62301	0.00871579	0.999831	Down	9	21993092	21994057	+	crygm7	crystallin%2C gamma M7 [Source:ZFIN%3BAcc:ZDB-GENE-050516-8]	-	-	GO:0005212:structural constituent of eye lens;	-	-
ENSDARG00000034165	1860	6	0.21	6	0.26	7	0.24	0	0	0	0	0	0	2.66117	-4.68526	1.7901	-2.61732	0.00886237	0.999831	Down	25	7229046	7230905	+	lingo1a	leucine rich repeat and Ig domain containing 1a [Source:ZFIN%3BAcc:ZDB-GENE-080327-16]	-	GO:0031012:extracellular matrix;GO:0005615:extracellular space;GO:0016021:integral component of membrane;GO:0005886:plasma membrane;	GO:0005154:epidermal growth factor receptor binding;	-	-
ENSDARG00000079762	4679	0	0	250	4.27	92	1.24	1	0.02	0	0	14	0.23	57.1646	-4.55351	1.74007	-2.61685	0.00887447	0.999831	Down	22	9871238	9880408	+	si:dkey-253d23.4	si:dkey-253d23.4 [Source:ZFIN%3BAcc:ZDB-GENE-050208-730]	-	-	-	-	-
ENSDARG00000117594	4613	0	0	211	3.66	35	0.48	8	0.15	0	0	2	0.03	42.4806	-4.50962	1.73773	-2.59513	0.00945558	0.999831	Down	15	37259354	37264265	-	CR848749.2	-	-	-	-	-	-
ENSDARG00000113481	387	7	1.16	1	0.21	18	2.93	0	0	0	0	0	0	3.37055	-5.03671	1.94249	-2.59292	0.00951647	0.999831	Down	25	35140360	35140746	-	si:ch211-113a14.19	si:ch211-113a14.19 [Source:ZFIN%3BAcc:ZDB-GENE-121214-198]	GO:0050832:defense response to fungus;GO:0050830:defense response to Gram-positive bacterium;GO:0045087:innate immune response;GO:0031640:killing of cells of other organism;GO:0051673:membrane disruption in other organism;	GO:0005615:extracellular space;GO:0000786:nucleosome;GO:0005634:nucleus;	GO:0003677:DNA binding;GO:0046982:protein heterodimerization activity;	K11251	;ko04217 Necroptosis;ko04613 Neutrophil extracellular trap formation;ko05034 Alcoholism;ko05322 Systemic lupus erythematosus;
ENSDARG00000102884	946	0	0	0	0	0	0	2	0.18	6	0.58	4	0.33	2.38939	4.94548	1.91098	2.58793	0.00965547	0.999831	Ups	4	69888328	69899962	+	si:ch211-145h19.5	si:ch211-145h19.5 [Source:ZFIN%3BAcc:ZDB-GENE-110914-112]	-	GO:0005634:nucleus;	GO:0003677:DNA binding;GO:0046872:metal ion binding;	K09228	;ko05168 Herpes simplex virus 1 infection;
ENSDARG00000035184	2188	84	2.46	134	4.9	8	0.23	6	0.23	11	0.46	9	0.32	39.0419	-2.75686	1.06646	-2.58505	0.00973656	0.999831	Down	5	55934129	55952128	+	tmem150ab	transmembrane protein 150Ab [Source:ZFIN%3BAcc:ZDB-GENE-040426-1576]	GO:0046854:phosphatidylinositol phosphorylation;GO:0072659:protein localization to plasma membrane;GO:0010506:regulation of autophagy;	GO:0005887:integral component of plasma membrane;GO:0005764:lysosome;	-	-	-
ENSDARG00000100450	2085	0	0	71	2.72	21	0.63	0	0	2	0.09	0	0	15.3845	-5.10912	1.97844	-2.58239	0.00981176	0.999831	Down	19	3747060	3759142	-	btr21	bloodthirsty-related gene family%2C member 21 [Source:ZFIN%3BAcc:ZDB-GENE-081031-80]	GO:0050776:regulation of immune response;GO:0050852:T cell receptor signaling pathway;GO:0006915:apoptotic process;GO:2000059:negative regulation of protein ubiquitination involved in ubiquitin-dependent protein catabolic process;GO:2001235:positive regulation of apoptotic signaling pathway;GO:0016567:protein ubiquitination;	GO:0005737:cytoplasm;GO:0009897:external side of plasma membrane;GO:0016021:integral component of membrane;GO:0005886:plasma membrane;GO:0005829:cytosol;GO:0005739:mitochondrion;	GO:0005102:receptor binding;GO:0042802:identical protein binding;GO:0016740:transferase activity;GO:0008270:zinc ion binding;	K12015	-
ENSDARG00000026236	2255	25	0.71	38	1.35	33	0.92	124	4.63	48	1.96	77	2.67	59.5425	1.73358	0.6714	2.58204	0.00982176	0.999831	Ups	21	34835811	34844316	-	zgc:56585	zgc:56585 [Source:ZFIN%3BAcc:ZDB-GENE-040426-1084]	-	-	-	K00069	;ko05202 Transcriptional misregulation in cancer;
ENSDARG00000077167	679	0	0	0	0	0	0	1	0.12	0	0	31	3.57	4.84256	5.99333	2.32295	2.58006	0.00987841	0.999831	Ups	7	30085149	30087048	-	nmbb	neuromedin Bb [Source:ZFIN%3BAcc:ZDB-GENE-081022-31]	-	-	-	K05223	;ko04080 Neuroactive ligand-receptor interaction;
ENSDARG00000011671	5593	33	0.38	100	1.43	14	0.16	8	0.12	6	0.1	5	0.07	26.524	-2.65678	1.03043	-2.57832	0.00992816	0.999831	Down	21	20356458	20376607	+	pde6b	phosphodiesterase 6B%2C cGMP-specific%2C rod%2C beta [Source:ZFIN%3BAcc:ZDB-GENE-090421-2]	GO:0009583:detection of light stimulus;GO:0007186:G-protein coupled receptor signaling pathway;GO:0051480:cytosolic calcium ion homeostasis;GO:0060041:retina development in camera-type eye;GO:0007601:visual perception;	GO:0016020:membrane;GO:0001750:photoreceptor outer segment;	GO:0047555:3',5'-cyclic-GMP phosphodiesterase activity;GO:0046872:metal ion binding;	K13756	;ko00230 Purine metabolism;ko01100 Metabolic pathways;ko04744 Phototransduction;
ENSDARG00000103564	1568	23	0.94	29	1.48	1	0.04	0	0	0	0	2	0.1	8.1326	-4.52841	1.75754	-2.57656	0.00997881	0.999831	Down	3	8825382	8836722	+	si:dkeyp-30d6.2	si:dkeyp-30d6.2 [Source:ZFIN%3BAcc:ZDB-GENE-141222-83]	GO:0071346:cellular response to interferon-gamma;GO:0042742:defense response to bacterium;GO:0006955:immune response;GO:0044406:adhesion of symbiont to host;GO:0035458:cellular response to interferon-beta;GO:0071222:cellular response to lipopolysaccharide;GO:0050830:defense response to Gram-positive bacterium;GO:0042832:defense response to protozoan;GO:0034504:protein localization to nucleus;GO:0…	GO:0015629:actin cytoskeleton;GO:0005737:cytoplasm;GO:0031410:cytoplasmic vesicle;GO:0005829:cytosol;GO:0005794:Golgi apparatus;GO:0000139:Golgi membrane;GO:0005654:nucleoplasm;GO:0005634:nucleus;GO:0048471:perinuclear region of cytoplasm;GO:0020005:symbiont-containing vacuole membrane;	GO:0005525:GTP binding;GO:0003924:GTPase activity;GO:0042803:protein homodimerization activity;	-	-
ENSDARG00000027657	1217	7	0.37	1	0.07	7	0.36	6	0.42	12	0.91	71	4.57	16.5387	2.90901	1.13675	2.55906	0.0104955	0.999831	Ups	24	24847683	24881996	-	crhb	corticotropin releasing hormone b [Source:ZFIN%3BAcc:ZDB-GENE-041114-75]	-	GO:0005576:extracellular region;	GO:0005179:hormone activity;	K05256	;ko04080 Neuroactive ligand-receptor interaction;ko04730 Long-term depression;ko04934 Cushing syndrome;ko05034 Alcoholism;
ENSDARG00000094561	508	0	0	1	0.16	0	0	1	0.17	2	0.36	24	3.7	4.43528	4.85372	1.903	2.55056	0.010755	0.999831	Ups	5	37884022	37886077	-	si:ch211-139a5.9	si:ch211-139a5.9 [Source:ZFIN%3BAcc:ZDB-GENE-141222-100]	-	-	-	K01538	;ko04022 cGMP-PKG signaling pathway;ko04024 cAMP signaling pathway;ko04260 Cardiac muscle contraction;ko04261 Adrenergic signaling in cardiomyocytes;ko04911 Insulin secretion;ko04918 Thyroid hormone synthesis;ko04919 Thyroid hormone signaling pathway;ko04960 Aldosterone-regulated sodium reabsorption;ko04961 Endocrine and other factor-regulated calcium reabsorption;ko04964 Proximal tubule bicarbon…
ENSDARG00000090869	1512	9	0.38	23	1.22	0	0	0	0	0	0	0	0	5.00733	-5.59391	2.19622	-2.54706	0.0108633	0.999831	Down	22	6881445	6884981	-	FO904898.4	uncharacterized LOC100333939 [Source:NCBI gene%3BAcc:100333939]	-	-	-	-	-
ENSDARG00000113226	267	0	0	0	0	0	0	2	0.63	8	2.76	2	0.59	2.56239	5.038	1.97955	2.54502	0.010927	0.999831	Ups	25	21259229	21296202	+	CR384055.1	-	-	-	-	-	-
ENSDARG00000086117	1257	0	0	4	0.25	36	1.8	0	0	0	0	0	0	5.4169	-5.71522	2.24793	-2.54243	0.0110083	0.999831	Down	1	55600504	55606573	+	umod	uromodulin [Source:ZFIN%3BAcc:ZDB-GENE-121214-192]	-	-	-	-	-
ENSDARG00000056659	5200	33	0.41	231	3.55	24	0.29	3	0.05	9	0.16	24	0.36	52.9037	-2.88176	1.13503	-2.53892	0.0111195	0.999831	Down	17	22032296	22067451	-	ttbk1b	tau tubulin kinase 1b [Source:ZFIN%3BAcc:ZDB-GENE-100609-5]	GO:0007611:learning or memory;GO:0010629:negative regulation of gene expression;GO:0032091:negative regulation of protein binding;GO:0018105:peptidyl-serine phosphorylation;GO:0018107:peptidyl-threonine phosphorylation;GO:0018108:peptidyl-tyrosine phosphorylation;GO:1904031:positive regulation of cyclin-dependent protein kinase activity;GO:2001056:positive regulation of cysteine-type endopeptidas…	GO:0005737:cytoplasm;GO:0005829:cytosol;GO:0005875:microtubule associated complex;GO:0043025:neuronal cell body;GO:0005654:nucleoplasm;GO:0005634:nucleus;GO:0048471:perinuclear region of cytoplasm;	GO:0005524:ATP binding;GO:0004674:protein serine/threonine kinase activity;GO:0048156:tau protein binding;GO:0050321:tau-protein kinase activity;	K08815	-
ENSDARG00000097762	804	5	0.4	30	2.98	5	0.39	0	0	1	0.11	1	0.1	6.77347	-4.08057	1.61651	-2.52431	0.0115927	0.999831	Down	2	335949	338458	-	CU693494.3	-	-	-	-	-	-
ENSDARG00000061635	6200	479	4.96	52	0.67	1059	10.75	109	1.48	29	0.43	111	1.4	248.706	-2.2333	0.888974	-2.51222	0.0119975	0.999831	Down	18	38900092	39042201	+	myo5aa	myosin VAa [Source:ZFIN%3BAcc:ZDB-GENE-041027-2]	GO:0030048:actin filament-based movement;GO:0032869:cellular response to insulin stimulus;GO:0007268:synaptic transmission;GO:0048066:developmental pigmentation;GO:0051643:endoplasmic reticulum localization;GO:0006887:exocytosis;GO:0048820:hair follicle maturation;GO:0030073:insulin secretion;GO:0031987:locomotion involved in locomotory behavior;GO:0042759:long-chain fatty acid biosynthetic proce…	GO:0005884:actin filament;GO:0042641:actomyosin;GO:0042642:actomyosin, myosin complex part;GO:0030424:axon;GO:0005737:cytoplasm;GO:0005829:cytosol;GO:0030425:dendrite;GO:0005769:early endosome;GO:0032433:filopodium tip;GO:0005794:Golgi apparatus;GO:0032593:insulin-responsive compartment;GO:0005882:intermediate filament;GO:0005770:late endosome;GO:0005764:lysosome;GO:0042470:melanosome;GO:0016020:…	GO:0003779:actin binding;GO:0051015:actin filament binding;GO:0005524:ATP binding;GO:0043008:ATP-dependent protein binding;GO:0005509:calcium ion binding;GO:0048306:calcium-dependent protein binding;GO:0005516:calmodulin binding;GO:0042802:identical protein binding;GO:0000146:microfilament motor activity;GO:0003774:motor activity;GO:0046983:protein dimerization activity;GO:0046982:protein heterod…	K10357	;ko05130 Pathogenic Escherichia coli infection;
ENSDARG00000018856	4154	230	3.55	3	0.06	651	9.87	51	1.03	5	0.11	13	0.24	125.978	-3.17959	1.27061	-2.5024	0.0123354	0.999831	Down	10	34737322	34871737	-	dclk1a	doublecortin-like kinase 1a [Source:ZFIN%3BAcc:ZDB-GENE-061013-124]	GO:0048675:axon extension;GO:0007417:central nervous system development;GO:0021952:central nervous system projection neuron axonogenesis;GO:0048813:dendrite morphogenesis;GO:0016197:endosomal transport;GO:0030900:forebrain development;GO:0035556:intracellular signal transduction;GO:1900181:negative regulation of protein localization to nucleus;GO:0007399:nervous system development;GO:0001764:neur…	GO:0005887:integral component of plasma membrane;GO:0014069:postsynaptic density;	GO:0005524:ATP binding;GO:0004672:protein kinase activity;GO:0004674:protein serine/threonine kinase activity;	K08805;K16579	-
ENSDARG00000037639	1964	24	0.78	25	1.02	45	1.44	4	0.17	6	0.28	6	0.24	16.1081	-2.11186	0.847186	-2.4928	0.0126742	0.999831	Down	14	212867	215051	-	nkx3-2	NK3 homeobox 2 [Source:ZFIN%3BAcc:ZDB-GENE-030127-1]	GO:0007275:multicellular organismal development;GO:0045944:positive regulation of transcription from RNA polymerase II promoter;	GO:0005634:nucleus;	GO:0003677:DNA binding;GO:0043565:sequence-specific DNA binding;	K09995	-
ENSDARG00000076634	2804	222	5.08	63	1.8	702	15.76	32	0.96	67	2.2	58	1.62	159.95	-2.09143	0.843157	-2.48047	0.0131208	0.999831	Down	2	45139470	45154622	-	capn10	calpain 10 [Source:ZFIN%3BAcc:ZDB-GENE-110411-137]	-	-	-	K08579	-
ENSDARG00000078828	1344	5	0.24	16	0.95	5	0.23	0	0	1	0.07	0	0	4.22733	-4.29688	1.73673	-2.47412	0.0133565	0.999831	Down	22	11535131	11537654	+	npb	neuropeptide B [Source:ZFIN%3BAcc:ZDB-GENE-040107-40]	-	-	-	K05267	;ko04080 Neuroactive ligand-receptor interaction;
ENSDARG00000096700	3819	0	0	1	0.02	1	0.02	5	0.11	3	0.07	15	0.31	4.18607	3.78526	1.53519	2.46566	0.0136762	0.999831	Ups	12	20492884	20500329	+	FP565451.1	-	-	-	-	-	-
ENSDARG00000005565	6278	88	0.9	544	6.93	223	2.24	29	0.39	41	0.6	107	1.33	164.003	-2.09129	0.848377	-2.46505	0.0136993	0.999831	Down	6	41038757	41060423	+	entpd8	ectonucleoside triphosphate diphosphohydrolase 8 [Source:ZFIN%3BAcc:ZDB-GENE-040724-142]	-	GO:0016021:integral component of membrane;GO:0005886:plasma membrane;	GO:0005524:ATP binding;GO:0046872:metal ion binding;	K01510	;ko00230 Purine metabolism;ko00240 Pyrimidine metabolism;ko01100 Metabolic pathways;ko05169 Epstein-Barr virus infection;
ENSDARG00000115872	177	0	0	0	0	0	0	1	0.48	0	0	26	11.5	4.09115	5.75188	2.33374	2.46466	0.0137142	0.999831	Ups	12	34259742	34295298	-	CU855552.1	-	-	-	-	-	-
ENSDARG00000043722	1397	1	0.05	1	0.06	4	0.18	1	0.06	56	3.69	1	0.06	14.41	4.04439	1.64399	2.4601	0.0138897	0.999831	Ups	25	16582172	16589461	-	cpa4	carboxypeptidase A4 [Source:ZFIN%3BAcc:ZDB-GENE-040704-61]	GO:0006508:proteolysis;	GO:0005615:extracellular space;	GO:0004181:metallocarboxypeptidase activity;GO:0008270:zinc ion binding;	K01298	;ko04972 Pancreatic secretion;ko04974 Protein digestion and absorption;
ENSDARG00000055986	750	5	0.43	0	0	30	2.52	0	0	0	0	0	0	4.53881	-5.46272	2.22748	-2.45242	0.01419	0.999831	Down	9	32657695	32663496	-	gzm3.2	granzyme 3%2C tandem duplicate 2 [Source:ZFIN%3BAcc:ZDB-GENE-070912-133]	-	-	-	-	-
ENSDARG00000113257	492	78	10.17	84	13.65	33	4.22	16	2.74	97	18.15	1007	160.18	205.242	2.66446	1.08756	2.44994	0.014288	0.999831	Ups	16	43353106	43356018	-	FO704821.1	zmp:0000000930 [Source:NCBI gene%3BAcc:100151586]	-	-	-	-	-
ENSDARG00000028333	2079	2	0.06	1	0.04	0	0	3	0.12	5	0.22	20	0.75	5.15012	3.54494	1.44704	2.44978	0.0142943	0.999831	Ups	7	17255705	17309337	+	nitr9	novel immune-type receptor 9 [Source:ZFIN%3BAcc:ZDB-GENE-041001-6]	-	-	-	-	-
ENSDARG00000093904	1130	0	0	0	0	0	0	0	0	10	0.81	6	0.42	3.26954	5.40352	2.20868	2.4465	0.0144252	0.999831	Ups	16	23335528	23337596	-	CT030031.1	-	-	-	-	-	-
ENSDARG00000002546	2747	645	15.06	8	0.23	2514	57.61	125	3.83	3	0.1	128	3.65	451.541	-3.24956	1.3306	-2.44217	0.0145991	0.999831	Down	12	9817440	9840819	+	rundc3ab	RUN domain containing 3Ab [Source:NCBI gene%3BAcc:393118]	-	-	-	-	-
ENSDARG00000100379	1883	0	0	0	0	0	0	2	0.09	0	0	21	0.87	3.5235	5.5388	2.26835	2.44177	0.0146154	0.999831	Ups	16	35379720	35383122	+	si:dkey-34d22.2	si:dkey-34d22.2 [Source:ZFIN%3BAcc:ZDB-GENE-131127-261]	-	-	-	-	-
ENSDARG00000093531	792	0	0	0	0	0	0	0	0	9	1.05	7	0.69	3.18304	5.36696	2.20017	2.43933	0.0147144	0.999831	Ups	10	9281991	9285174	+	slc37a4b	solute carrier family 37 member 4b [Source:ZFIN%3BAcc:ZDB-GENE-040426-827]	GO:0008643:carbohydrate transport;GO:0006094:gluconeogenesis;GO:0042593:glucose homeostasis;GO:0006006:glucose metabolic process;GO:0015760:glucose-6-phosphate transport;GO:0035435:phosphate ion transmembrane transport;	GO:0005783:endoplasmic reticulum;GO:0005789:endoplasmic reticulum membrane;GO:0030176:integral component of endoplasmic reticulum membrane;GO:0016021:integral component of membrane;GO:0016020:membrane;	GO:0061513:glucose 6-phosphate:inorganic phosphate antiporter activity;GO:0015152:glucose-6-phosphate transmembrane transporter activity;	K08171	;ko04973 Carbohydrate digestion and absorption;
ENSDARG00000108939	2664	28	0.67	4	0.12	4	0.09	0	0	93	3.21	196	5.76	56.0198	3.49472	1.43526	2.4349	0.014896	0.999831	Ups	5	58487368	58512609	+	FQ378016.1	high affinity cGMP-specific 3'%2C5'-cyclic phosphodiesterase 9A-like [Source:NCBI gene%3BAcc:571737]	GO:0046069:cGMP catabolic process;GO:0046068:cGMP metabolic process;GO:0019934:cGMP-mediated signaling;GO:0010613:positive regulation of cardiac muscle hypertrophy;GO:0007165:signal transduction;	GO:0005783:endoplasmic reticulum;GO:0005794:Golgi apparatus;GO:0043204:perikaryon;GO:0048471:perinuclear region of cytoplasm;GO:0032587:ruffle membrane;GO:0042383:sarcolemma;GO:0005829:cytosol;	GO:0047555:3',5'-cyclic-GMP phosphodiesterase activity;GO:0042802:identical protein binding;GO:0046872:metal ion binding;GO:0004114:3',5'-cyclic-nucleotide phosphodiesterase activity;	K13761	;ko00230 Purine metabolism;ko01100 Metabolic pathways;
ENSDARG00000104453	5248	21	0.26	15	0.23	26	0.31	241	3.87	18	0.32	17	0.25	59.5913	2.59057	1.06577	2.4307	0.0150698	0.999831	Ups	14	15816509	15956921	-	flt4	fms-related tyrosine kinase 4 [Source:NCBI gene%3BAcc:30121]	GO:0001525:angiogenesis;GO:0001945:lymph vessel development;GO:0036303:lymph vessel morphogenesis;GO:0001946:lymphangiogenesis;GO:0060836:lymphatic endothelial cell differentiation;GO:0008045:motor neuron axon guidance;GO:0008284:positive regulation of cell proliferation;GO:0070374:positive regulation of ERK1 and ERK2 cascade;GO:0043410:positive regulation of MAPK cascade;GO:0014068:positive regu…	GO:0005737:cytoplasm;GO:0005887:integral component of plasma membrane;GO:0005634:nucleus;GO:0043235:receptor complex;	GO:0005524:ATP binding;GO:0042803:protein homodimerization activity;GO:0004714:transmembrane receptor protein tyrosine kinase activity;GO:0038085:vascular endothelial growth factor binding;GO:0005021:vascular endothelial growth factor-activated receptor activity;GO:0036328:VEGF-C-activated receptor activity;	K05097	;ko04010 MAPK signaling pathway;ko04014 Ras signaling pathway;ko04015 Rap1 signaling pathway;ko04020 Calcium signaling pathway;ko04151 PI3K-Akt signaling pathway;ko04510 Focal adhesion;ko05200 Pathways in cancer;ko05224 Breast cancer;
ENSDARG00000079889	4897	101	1.32	14	0.23	32	0.41	7	0.12	6	0.11	9	0.14	22.6844	-2.20431	0.908832	-2.42544	0.0152899	0.999831	Down	10	35468978	35528389	+	phldb2a	pleckstrin homology-like domain%2C family B%2C member 2a [Source:ZFIN%3BAcc:ZDB-GENE-091118-9]	GO:0045184:establishment of protein localization;GO:0000226:microtubule cytoskeleton organization;GO:0051895:negative regulation of focal adhesion assembly;GO:0051497:negative regulation of stress fiber assembly;GO:1903690:negative regulation of wound healing, spreading of epidermal cells;GO:1904261:positive regulation of basement membrane assembly involved in embryonic body morphogenesis;GO:0010…	GO:0045180:basal cortex;GO:0031252:cell leading edge;GO:0005829:cytosol;GO:0045111:intermediate filament cytoskeleton;GO:0005886:plasma membrane;	GO:0045296:cadherin binding;	-	-
ENSDARG00000052039	1819	3	0.11	28	1.23	13	0.45	7	0.32	108	5.47	136	5.85	54.1554	2.79683	1.15406	2.42347	0.0153732	0.999831	Ups	1	58050905	58064738	-	caspb	caspase b [Source:ZFIN%3BAcc:ZDB-GENE-020812-1]	GO:0006919:activation of cysteine-type endopeptidase activity involved in apoptotic process;GO:0006915:apoptotic process;GO:0043065:positive regulation of apoptotic process;	GO:0005737:cytoplasm;	GO:0004197:cysteine-type endopeptidase activity;GO:0097199:cysteine-type endopeptidase activity involved in apoptotic signaling pathway;	-	-
ENSDARG00000112061	1458	0	0	0	0	0	0	3	0.17	4	0.25	3	0.16	1.94931	4.65483	1.92426	2.41902	0.0155624	0.999831	Ups	4	68393422	68418475	+	CT737127.1	-	GO:0007010:cytoskeleton organization;GO:0022604:regulation of cell morphogenesis;GO:0006355:regulation of transcription, DNA-templated;	GO:0005634:nucleus;	GO:0003677:DNA binding;GO:0046872:metal ion binding;	K09228	;ko05168 Herpes simplex virus 1 infection;
ENSDARG00000076657	2542	0	0	0	0	0	0	6	0.2	4	0.14	1	0.03	2.20007	4.82943	1.9983	2.41677	0.0156588	0.999831	Ups	23	7592009	7674902	-	plagl2	pleiomorphic adenoma gene-like 2 [Source:ZFIN%3BAcc:ZDB-GENE-020806-1]	GO:0034378:chylomicron assembly;GO:0006629:lipid metabolic process;GO:2001244:positive regulation of intrinsic apoptotic signaling pathway;GO:0009791:post-embryonic development;	GO:0005634:nucleus;	GO:0001228:RNA polymerase II transcription regulatory region sequence-specific DNA binding transcription factor activity involved in positive regulation of transcription;GO:0003700:sequence-specific DNA binding transcription factor activity;GO:0000981:sequence-specific DNA binding RNA polymerase II transcription factor activity;GO:0046872:metal ion binding;GO:0043565:sequence-specific DNA binding;	K19486	-
ENSDARG00000089913	7751	103	0.85	27	0.28	127	1.03	26	0.28	9	0.11	9	0.09	41.8375	-2.02701	0.838868	-2.41636	0.0156765	0.999831	Down	12	27704015	28073562	+	cacna1g	calcium channel%2C voltage-dependent%2C T type%2C alpha 1G subunit [Source:ZFIN%3BAcc:ZDB-GENE-090514-2]	GO:0014824:artery smooth muscle contraction;GO:0086016:AV node cell action potential;GO:0086027:AV node cell to bundle of His cell signaling;GO:0070509:calcium ion import;GO:0060402:calcium ion transport into cytosol;GO:0086002:cardiac muscle cell action potential involved in contraction;GO:0071549:cellular response to dexamethasone stimulus;GO:0086010:membrane depolarization during action potent…	GO:0044297:cell body;GO:0030425:dendrite;GO:0016020:membrane;GO:0043025:neuronal cell body;GO:0048471:perinuclear region of cytoplasm;GO:0005886:plasma membrane;GO:0005891:voltage-gated calcium channel complex;GO:0005737:cytoplasm;	GO:0008332:low voltage-gated calcium channel activity;GO:0086056:voltage-gated calcium channel activity involved in AV node cell action potential;GO:0086059:voltage-gated calcium channel activity involved SA node cell action potential;GO:0097110:scaffold protein binding;	K04854	;ko04010 MAPK signaling pathway;ko04020 Calcium signaling pathway;ko04713 Circadian entrainment;ko04925 Aldosterone synthesis and secretion;ko04927 Cortisol synthesis and secretion;ko04929 GnRH secretion;ko04930 Type II diabetes mellitus;ko04934 Cushing syndrome;
ENSDARG00000040738	628	10	1.02	5	0.64	9	0.9	0	0	0	0	1	0.12	3.37936	-4.00984	1.66186	-2.41286	0.0158279	0.999831	Down	9	22017368	22018304	+	zgc:153846	zgc:153846 [Source:ZFIN%3BAcc:ZDB-GENE-060929-898]	-	-	GO:0005212:structural constituent of eye lens;	-	-
ENSDARG00000001953	3827	195	3.27	791	16.53	223	3.67	289	6.36	1688	40.61	2732	55.87	1051.27	2.20077	0.91266	2.41138	0.0158924	0.999831	Ups	4	25472505	25485404	-	pfkfb3	6-phosphofructo-2-kinase/fructose-2%2C6-biphosphatase 3 [Source:ZFIN%3BAcc:ZDB-GENE-040426-2724]	GO:0006003:fructose 2,6-bisphosphate metabolic process;GO:0006000:fructose metabolic process;GO:0045821:positive regulation of glycolytic process;	GO:0005829:cytosol;GO:0005654:nucleoplasm;	GO:0003873:6-phosphofructo-2-kinase activity;GO:0005524:ATP binding;GO:0004331:fructose-2,6-bisphosphate 2-phosphatase activity;	K01103	;ko00051 Fructose and mannose metabolism;ko01100 Metabolic pathways;ko04066 HIF-1 signaling pathway;ko04152 AMPK signaling pathway;
ENSDARG00000069966	4387	331	4.84	7	0.13	7116	102.12	238	4.57	13	0.27	262	4.67	1062.22	-3.50067	1.45611	-2.40413	0.0162111	0.999831	Down	15	590670	604353	-	alox5b.3	arachidonate 5-lipoxygenase b%2C tandem duplicate 3 [Source:ZFIN%3BAcc:ZDB-GENE-050522-330]	GO:0019221:cytokine-mediated signaling pathway;GO:0035655:interleukin-18-mediated signaling pathway;GO:0019370:leukotriene biosynthetic process;GO:0006691:leukotriene metabolic process;GO:0002540:leukotriene production involved in inflammatory response;GO:2001301:lipoxin biosynthetic process;GO:0019372:lipoxygenase pathway;GO:0042759:long-chain fatty acid biosynthetic process;GO:0043312:neutrophi…	GO:0005829:cytosol;GO:0005576:extracellular region;GO:0005615:extracellular space;GO:0005635:nuclear envelope;GO:0005641:nuclear envelope lumen;GO:0016363:nuclear matrix;GO:0031965:nuclear membrane;GO:0005654:nucleoplasm;GO:0034774:secretory granule lumen;	GO:0004051:arachidonate 5-lipoxygenase activity;GO:0005506:iron ion binding;	K09228	;ko05168 Herpes simplex virus 1 infection;
ENSDARG00000115545	1249	1	0.05	3	0.19	1	0.05	64	4.32	3	0.22	0	0	13.2359	4.06845	1.69469	2.4007	0.0163636	0.999831	Ups	3	31177972	31188131	+	clec19a	C-type lectin domain containing 19A [Source:ZFIN%3BAcc:ZDB-GENE-080917-46]	-	GO:0005576:extracellular region;	GO:0030246:carbohydrate binding;	-	-
ENSDARG00000032838	5672	88	1	0	0	42	0.47	4	0.06	0	0	0	0	16.7311	-4.43604	1.84879	-2.39943	0.0164205	0.999831	Down	20	43602810	43644531	+	si:dkey-206f10.1	si:dkey-206f10.1 [Source:ZFIN%3BAcc:ZDB-GENE-041014-154]	GO:0007190:activation of adenylate cyclase activity;GO:0034199:activation of protein kinase A activity;GO:0007189:adenylate cyclase-activating G-protein coupled receptor signaling pathway;GO:0007193:adenylate cyclase-inhibiting G-protein coupled receptor signaling pathway;GO:0006171:cAMP biosynthetic process;GO:0071277:cellular response to calcium ion;GO:0071377:cellular response to glucagon stim…	GO:0016324:apical plasma membrane;GO:0030424:axon;GO:0016323:basolateral plasma membrane;GO:0005901:caveola;GO:0030054:cell junction;GO:0005905:coated pit;GO:0030665:clathrin-coated vesicle membrane;GO:0030425:dendrite;GO:0060076:excitatory synapse;GO:0005887:integral component of plasma membrane;GO:0016020:membrane;GO:0045121:membrane raft;GO:0032809:neuronal cell body membrane;GO:0005886:plasma…	GO:0003779:actin binding;GO:0004016:adenylate cyclase activity;GO:0005524:ATP binding;GO:0008294:calcium- and calmodulin-responsive adenylate cyclase activity;GO:0005516:calmodulin binding;GO:0046872:metal ion binding;GO:0046983:protein dimerization activity;GO:0046982:protein heterodimerization activity;GO:0042803:protein homodimerization activity;GO:0051721:protein phosphatase 2A binding;	K08048	;ko00230 Purine metabolism;ko01100 Metabolic pathways;ko01522 Endocrine resistance;ko04015 Rap1 signaling pathway;ko04020 Calcium signaling pathway;ko04022 cGMP-PKG signaling pathway;ko04024 cAMP signaling pathway;ko04062 Chemokine signaling pathway;ko04072 Phospholipase D signaling pathway;ko04114 Oocyte meiosis;ko04211 Longevity regulating pathway;ko04213 Longevity regulating pathway - multiple…
ENSDARG00000079986	6328	43	0.44	27	0.34	1	0.01	12	0.16	171	2.49	194	2.4	81.7209	2.86449	1.19435	2.39838	0.016468	0.999831	Ups	22	9359899	9383484	+	BX927329.1	-	-	-	-	K12800	;ko04217 Necroptosis;ko04621 NOD-like receptor signaling pathway;ko04625 C-type lectin receptor signaling pathway;ko05130 Pathogenic Escherichia coli infection;ko05131 Shigellosis;ko05132 Salmonella infection;ko05133 Pertussis;ko05135 Yersinia infection;ko05164 Influenza A;ko05171 Coronavirus disease - COVID-19;
ENSDARG00000099117	875	5	0.37	10	0.91	4	0.29	3	0.29	55	5.79	36	3.22	21.817	2.75813	1.15231	2.39356	0.0166856	0.999831	Ups	16	45228101	45235947	-	si:dkey-33i11.4	si:dkey-33i11.4 [Source:NCBI gene%3BAcc:569335]	GO:0006811:ion transport;GO:2000649:regulation of sodium ion transmembrane transporter activity;	GO:0016021:integral component of membrane;GO:0005886:plasma membrane;	GO:0017080:sodium channel regulator activity;	-	-
ENSDARG00000035859	2704	66	1.57	188	5.56	106	2.47	24	0.75	1206	41.06	300	8.68	389.021	2.63502	1.10294	2.38908	0.0168906	0.999831	Ups	2	24536762	24542518	+	angptl4	angiopoietin-like 4 [Source:ZFIN%3BAcc:ZDB-GENE-041111-222]	GO:0001525:angiogenesis;GO:0006629:lipid metabolic process;GO:2000352:negative regulation of endothelial cell apoptotic process;GO:0051005:negative regulation of lipoprotein lipase activity;GO:0070328:triglyceride homeostasis;	GO:0005615:extracellular space;	GO:0004857:enzyme inhibitor activity;GO:0042802:identical protein binding;	K08767	;ko03320 PPAR signaling pathway;ko04979 Cholesterol metabolism;
ENSDARG00000114211	513	0	0	0	0	0	0	33	5.42	0	0	0	0	6.06459	6.30745	2.64547	2.38424	0.0171144	0.999831	Ups	17	50044389	50045375	-	FO834825.2	-	-	GO:0005634:nucleus;	GO:0003677:DNA binding;GO:0000981:sequence-specific DNA binding RNA polymerase II transcription factor activity;GO:0046872:metal ion binding;	K09228	;ko05168 Herpes simplex virus 1 infection;
ENSDARG00000078859	800	23	1.84	24	2.4	27	2.12	19	2	145	16.69	59	5.77	57.0864	2.1655	0.908803	2.3828	0.0171815	0.999831	Ups	23	39606108	39607679	+	g0s2	G0/G1 switch 2 [Source:ZFIN%3BAcc:ZDB-GENE-081022-103]	-	-	-	-	-
ENSDARG00000026086	2887	1	0.02	0	0	0	0	29	0.85	0	0	1	0.03	5.59881	5.20053	2.18707	2.37785	0.0174138	0.999831	Ups	6	46258820	46309060	+	-	zgc:162324 [Source:ZFIN%3BAcc:ZDB-GENE-070410-73]	-	-	-	-	-
ENSDARG00000102358	2063	6	0.19	33	1.28	0	0	0	0	1	0.04	0	0	6.59834	-4.97643	2.09337	-2.37724	0.0174428	0.999831	Down	4	39428602	39448829	-	si:dkey-261o4.9	si:dkey-261o4.9 [Source:ZFIN%3BAcc:ZDB-GENE-141211-1]	-	-	-	K12800	;ko04217 Necroptosis;ko04621 NOD-like receptor signaling pathway;ko04625 C-type lectin receptor signaling pathway;ko05130 Pathogenic Escherichia coli infection;ko05131 Shigellosis;ko05132 Salmonella infection;ko05133 Pertussis;ko05135 Yersinia infection;ko05164 Influenza A;ko05171 Coronavirus disease - COVID-19;
ENSDARG00000100709	1947	101	3.33	11	0.45	9	0.29	7	0.3	2	0.09	3	0.12	17.2987	-2.77278	1.16962	-2.37067	0.017756	0.999831	Down	21	11139175	11175010	+	agxt2	alanine--glyoxylate aminotransferase 2 [Source:ZFIN%3BAcc:ZDB-GENE-050913-100]	GO:0019265:glycine biosynthetic process, by transamination of glyoxylate;GO:0009436:glyoxylate catabolic process;GO:0046487:glyoxylate metabolic process;GO:0019481:L-alanine catabolic process, by transamination;GO:0045429:positive regulation of nitric oxide biosynthetic process;	GO:0005759:mitochondrial matrix;GO:0005739:mitochondrion;	GO:0047305:(R)-3-amino-2-methylpropionate-pyruvate transaminase activity;GO:0008453:alanine-glyoxylate transaminase activity;GO:0030170:pyridoxal phosphate binding;	K00827	;ko00250 Alanine, aspartate and glutamate metabolism;ko00260 Glycine, serine and threonine metabolism;ko00270 Cysteine and methionine metabolism;ko00280 Valine, leucine and isoleucine degradation;ko01100 Metabolic pathways;ko01110 Biosynthesis of secondary metabolites;
ENSDARG00000076748	3442	35	0.65	16	0.37	19	0.35	4	0.1	3	0.08	5	0.11	11.5988	-2.09818	0.885389	-2.36978	0.0177987	0.999831	Down	24	38726737	38787607	-	ntn2	netrin 2 [Source:ZFIN%3BAcc:ZDB-GENE-050310-2]	GO:0009887:organ morphogenesis;GO:0016358:dendrite development;GO:0008045:motor neuron axon guidance;GO:0007520:myoblast fusion;GO:0006355:regulation of transcription, DNA-templated;GO:0009888:tissue development;	GO:0005604:basement membrane;	GO:0005102:receptor binding;	K06843	;ko04360 Axon guidance;ko04361 Axon regeneration;
ENSDARG00000017010	2361	717	19.48	163	5.52	344	9.17	93	3.32	109	4.25	37	1.23	206.922	-1.71407	0.72338	-2.36953	0.0178108	0.999831	Down	7	57088920	57106722	+	scamp2l	secretory carrier membrane protein 2%2C like [Source:ZFIN%3BAcc:ZDB-GENE-030131-6432]	GO:0006892:post-Golgi vesicle-mediated transport;GO:0015031:protein transport;	GO:0070062:extracellular exosome;GO:0005794:Golgi apparatus;GO:0000139:Golgi membrane;GO:0016021:integral component of membrane;GO:0043231:intracellular membrane-bounded organelle;GO:0055038:recycling endosome membrane;GO:0032588:trans-Golgi network membrane;GO:0030133:transport vesicle;	-	-	-
ENSDARG00000076833	2279	4	0.11	31	1.09	6	0.17	9	0.33	179	7.23	42	1.44	56.9202	2.94816	1.24536	2.36731	0.017918	0.999831	Ups	1	10720294	10739221	+	atp1b1b	ATPase Na+/K+ transporting subunit beta 1b [Source:ZFIN%3BAcc:ZDB-GENE-001127-4]	GO:0006813:potassium ion transport;GO:0006814:sodium ion transport;	GO:0005890:sodium:potassium-exchanging ATPase complex;	GO:0005391:sodium:potassium-exchanging ATPase activity;	K01540	;ko04022 cGMP-PKG signaling pathway;ko04024 cAMP signaling pathway;ko04260 Cardiac muscle contraction;ko04261 Adrenergic signaling in cardiomyocytes;ko04911 Insulin secretion;ko04918 Thyroid hormone synthesis;ko04919 Thyroid hormone signaling pathway;ko04925 Aldosterone synthesis and secretion;ko04960 Aldosterone-regulated sodium reabsorption;ko04961 Endocrine and other factor-regulated calcium r…
ENSDARG00000098440	1161	29	1.6	1	0.07	15	0.81	1	0.07	1	0.08	0	0	6.01546	-3.84684	1.62528	-2.36687	0.0179391	0.999831	Down	13	45931232	45942034	-	si:ch211-62a1.4	si:ch211-62a1.4 [Source:ZFIN%3BAcc:ZDB-GENE-141222-41]	-	-	-	-	-
ENSDARG00000115234	600	11	1.18	2	0.27	5	0.52	0	0	0	0	0	0	2.3089	-4.49494	1.90016	-2.36556	0.0180027	0.999831	Down	9	22068412	22069364	-	crygm2b	crystallin%2C gamma M2b [Source:ZFIN%3BAcc:ZDB-GENE-050516-10]	-	-	GO:0005212:structural constituent of eye lens;	-	-
ENSDARG00000092801	335	0	0	0	0	0	0	2	0.5	13	3.57	0	0	3.44575	5.47315	2.31683	2.36234	0.0181599	0.999831	Ups	16	22009140	22012320	-	CR855277.2	RIIa domain-containing protein 1-like [Source:NCBI gene%3BAcc:100536995]	-	-	-	-	-
ENSDARG00000075428	1154	0	0	0	0	0	0	0	0	7	0.56	8	0.54	2.85976	5.2161	2.2089	2.3614	0.0182063	0.999831	Ups	3	21999006	22000986	-	BX547992.1	-	-	-	-	-	-
ENSDARG00000100375	1089	5	0.29	34	2.5	36	2.08	2	0.15	4	0.34	3	0.22	12.9116	-2.68317	1.13646	-2.36098	0.0182265	0.999831	Down	13	3880882	3926179	+	timm23b	translocase of inner mitochondrial membrane 23 homolog b (yeast) [Source:ZFIN%3BAcc:ZDB-GENE-141212-76]	GO:0030150:protein import into mitochondrial matrix;	GO:0031305:integral component of mitochondrial inner membrane;GO:0005744:mitochondrial inner membrane presequence translocase complex;	GO:0015450:P-P-bond-hydrolysis-driven protein transmembrane transporter activity;GO:0008320:protein transmembrane transporter activity;	K17794	;ko04212 Longevity regulating pathway - worm;
ENSDARG00000060745	1704	4	0.15	6	0.28	5	0.18	5	0.25	14	0.76	50	2.3	13.9082	2.46623	1.04549	2.35892	0.0183283	0.999831	Ups	8	30456161	30494617	+	pgm5	phosphoglucomutase 5 [Source:ZFIN%3BAcc:ZDB-GENE-060503-838]	GO:0007155:cell adhesion;GO:0006006:glucose metabolic process;GO:0030239:myofibril assembly;GO:0014706:striated muscle tissue development;	GO:0005913:cell-cell adherens junction;GO:0030055:cell-substrate junction;GO:0043034:costamere;GO:0009898:cytoplasmic side of plasma membrane;GO:0005829:cytosol;GO:0016010:dystrophin-associated glycoprotein complex;GO:0005925:focal adhesion;GO:0014704:intercalated disc;GO:0042383:sarcolemma;GO:0005914:spot adherens junction;GO:0001725:stress fiber;GO:0030018:Z disc;	GO:0000287:magnesium ion binding;GO:0004614:phosphoglucomutase activity;	K15636	-
ENSDARG00000095120	1082	0	0	1	0.07	0	0	12	0.93	0	0	10	0.72	3.87927	4.64692	1.97783	2.34951	0.0187982	0.999831	Ups	22	4862637	4864036	-	CU207311.2	-	-	-	-	-	-
ENSDARG00000088820	1684	131	4.99	69	3.28	53	1.98	618	30.91	42	2.3	145	6.74	179.678	2.08015	0.886839	2.34557	0.0189979	0.999831	Ups	3	240636	250145	+	zgc:174288	zgc:174288 [Source:NCBI gene%3BAcc:100126137]	GO:0007010:cytoskeleton organization;GO:0022604:regulation of cell morphogenesis;GO:0006355:regulation of transcription, DNA-templated;	GO:0005634:nucleus;	GO:0003677:DNA binding;GO:0003700:sequence-specific DNA binding transcription factor activity;GO:0000981:sequence-specific DNA binding RNA polymerase II transcription factor activity;GO:0046872:metal ion binding;	K09228	;ko05168 Herpes simplex virus 1 infection;
ENSDARG00000025728	5788	18	0.2	42	0.58	9	0.1	0	0	4	0.06	3	0.04	11.9112	-2.94634	1.25986	-2.33863	0.0193544	0.999831	Down	5	29597645	29643930	-	grin1b	glutamate receptor%2C ionotropic%2C N-methyl D-aspartate 1b [Source:ZFIN%3BAcc:ZDB-GENE-051202-2]	GO:0051290:protein heterotetramerization;	GO:0030054:cell junction;GO:0005887:integral component of plasma membrane;GO:0017146:N-methyl-D-aspartate selective glutamate receptor complex;GO:0005886:plasma membrane;GO:0014069:postsynaptic density;GO:0045211:postsynaptic membrane;	GO:0016594:glycine binding;GO:0004972:N-methyl-D-aspartate selective glutamate receptor activity;	K05208	;ko04014 Ras signaling pathway;ko04015 Rap1 signaling pathway;ko04020 Calcium signaling pathway;ko04024 cAMP signaling pathway;ko04080 Neuroactive ligand-receptor interaction;ko04713 Circadian entrainment;ko04720 Long-term potentiation;ko04724 Glutamatergic synapse;ko05010 Alzheimer disease;ko05014 Amyotrophic lateral sclerosis;ko05016 Huntington disease;ko05017 Spinocerebellar ataxia;ko05020 Pri…
ENSDARG00000054879	1759	16	0.58	1	0.05	4	0.14	0	0	0	0	0	0	2.60147	-4.66894	1.99677	-2.33825	0.0193743	0.999831	Down	12	25600685	25603341	+	six3b	SIX homeobox 3b [Source:ZFIN%3BAcc:ZDB-GENE-990415-128]	GO:0048856:anatomical structure development;GO:1902742:apoptotic process involved in development;GO:0007420:brain development;GO:0021846:cell proliferation in forebrain;GO:0048512:circadian behavior;GO:0002070:epithelial cell maturation;GO:0001654:eye development;GO:0021797:forebrain anterior/posterior pattern specification;GO:0021798:forebrain dorsal/ventral pattern formation;GO:0002088:lens dev…	GO:0005634:nucleus;GO:0005667:transcription factor complex;	GO:0003677:DNA binding;GO:0001228:RNA polymerase II transcription regulatory region sequence-specific DNA binding transcription factor activity involved in positive regulation of transcription;GO:0003700:sequence-specific DNA binding transcription factor activity;GO:0000981:sequence-specific DNA binding RNA polymerase II transcription factor activity;GO:0042826:histone deacetylase binding;GO:0000…	K19473	-
ENSDARG00000101193	1042	6	0.37	3	0.23	3	0.18	12	0.97	14	1.24	13	0.98	9.09593	2.18777	0.935714	2.33807	0.0193837	0.999831	Ups	4	73701801	73709502	-	BX855614.3	-	-	GO:0005634:nucleus;	GO:0003677:DNA binding;GO:0046872:metal ion binding;	K09228	;ko05168 Herpes simplex virus 1 infection;
ENSDARG00000096301	337	19	3.62	6	1.42	8	1.49	0	0	0	0	2	0.46	4.64062	-3.66438	1.56777	-2.33731	0.0194228	0.999831	Down	3	34021654	34022076	-	ighv1-4	immunoglobulin heavy variable 1-4 [Source:ZFIN%3BAcc:ZDB-GENE-040514-1]	GO:0050853:B cell receptor signaling pathway;GO:0006958:complement activation, classical pathway;GO:0042742:defense response to bacterium;GO:0045087:innate immune response;GO:0006911:phagocytosis, engulfment;GO:0006910:phagocytosis, recognition;GO:0050871:positive regulation of B cell activation;	GO:0009897:external side of plasma membrane;GO:0042571:immunoglobulin complex, circulating;	GO:0003823:antigen binding;GO:0034987:immunoglobulin receptor binding;	-	-
ENSDARG00000103123	2516	11	0.28	7	0.22	10	0.25	21	0.7	3	0.11	123	3.83	26.8763	2.59858	1.11363	2.33344	0.0196253	0.999831	Ups	5	38517486	38533861	-	CR854980.1	neuronal tyrosine-phosphorylated phosphoinositide-3-kinase adapter 1 [Source:NCBI gene%3BAcc:101885998]	GO:0048812:neuron projection morphogenesis;GO:0014065:phosphatidylinositol 3-kinase signaling;	-	-	-	-
ENSDARG00000076398	1291	23	1.14	55	3.41	1	0.05	0	0	0	0	5	0.3	13.0329	-3.93809	1.689	-2.33161	0.0197214	0.999831	Down	7	3171585	3188276	+	si:dkey-201l21.4	si:dkey-201l21.4 [Source:ZFIN%3BAcc:ZDB-GENE-060531-98]	-	-	-	-	-
ENSDARG00000099873	801	13	1.04	9	0.9	17	1.34	139	14.62	16	1.84	9	0.88	36.0083	2.52658	1.08385	2.33111	0.0197473	0.999831	Ups	3	49021079	49024570	+	zgc:163083	zgc:163083 [Source:ZFIN%3BAcc:ZDB-GENE-070424-53]	-	-	-	-	-
ENSDARG00000089602	4887	41	0.54	15	0.25	8	0.1	9	0.16	145	2.73	76	1.22	55.9082	2.47447	1.06229	2.32939	0.0198386	0.999831	Ups	3	3718608	3723494	-	si:dkey-217f16.1	si:dkey-217f16.1 [Source:ZFIN%3BAcc:ZDB-GENE-091116-95]	-	-	-	-	-
ENSDARG00000015964	1005	4	0.26	2	0.16	3	0.19	26	2.18	5	0.46	8	0.62	8.37711	2.55543	1.0972	2.32905	0.0198562	0.999831	Ups	6	30484005	30485009	-	zgc:153311	zgc:153311 [Source:ZFIN%3BAcc:ZDB-GENE-060825-194]	-	-	-	-	-
ENSDARG00000026519	7284	460	4.05	473	5.19	365	3.15	94	1.09	150	1.9	180	1.93	263.525	-1.20295	0.517173	-2.32602	0.0200176	0.999831	Down	20	15933028	16156419	-	ralgps2	Ral GEF with PH domain and SH3 binding motif 2 [Source:ZFIN%3BAcc:ZDB-GENE-040426-1212]	GO:0032485:regulation of Ral protein signal transduction;GO:0007264:small GTPase mediated signal transduction;	GO:0005737:cytoplasm;GO:0005886:plasma membrane;	GO:0005085:guanyl-nucleotide exchange factor activity;	-	-
ENSDARG00000093153	651	0	0	46	5.65	0	0	0	0	0	0	0	0	7.87207	-6.2493	2.68858	-2.32439	0.0201049	0.999831	Down	23	9307574	9308561	+	CU137717.1	-	-	-	-	-	-
ENSDARG00000089441	2115	54	1.64	340	12.86	122	3.63	73	2.91	1223	53.24	776	28.71	500.273	2.38037	1.02492	2.32249	0.0202064	0.999831	Ups	16	22695211	22713192	-	si:ch211-105c13.3	si:ch211-105c13.3 [Source:ZFIN%3BAcc:ZDB-GENE-030131-4483]	-	-	-	-	-
ENSDARG00000034852	2682	165	3.95	95	2.83	150	3.52	53	1.66	31	1.06	26	0.76	76.6039	-1.41094	0.608088	-2.32029	0.0203253	0.999831	Down	10	17460358	17484764	-	nt5c2l1	5'-nucleotidase%2C cytosolic II%2C like 1 [Source:ZFIN%3BAcc:ZDB-GENE-031006-8]	GO:0046085:adenosine metabolic process;GO:0046040:IMP metabolic process;	GO:0005737:cytoplasm;	GO:0008253:5'-nucleotidase activity;GO:0042802:identical protein binding;GO:0046872:metal ion binding;GO:0000166:nucleotide binding;	-	-
ENSDARG00000039385	1667	132	5.08	7	0.34	3	0.11	2	0.1	1	0.06	8	0.38	19.1112	-3.2304	1.39534	-2.31514	0.0206055	0.999831	Down	23	44307996	44332790	+	dlg4b	discs large MAGUK scaffold protein 4 [Source:HGNC Symbol%3BAcc:HGNC:2903]	GO:0098609:cell-cell adhesion;GO:0007268:synaptic transmission;GO:0043113:receptor clustering;GO:0097120:receptor localization to synapse;GO:0050808:synapse organization;	GO:0030054:cell junction;GO:0031594:neuromuscular junction;GO:0043005:neuron projection;GO:0014069:postsynaptic density;GO:0045202:synapse;	GO:0035255:ionotropic glutamate receptor binding;GO:0046982:protein heterodimerization activity;	K11828	;ko04390 Hippo signaling pathway;ko04724 Glutamatergic synapse;ko05016 Huntington disease;ko05022 Pathways of neurodegeneration - multiple diseases;ko05030 Cocaine addiction;
ENSDARG00000101478	1763	160	5.82	0	0	78	2.79	10	0.48	1	0.05	5	0.22	32.1246	-3.36593	1.45957	-2.30611	0.0211043	0.999831	Down	3	14317802	14373165	+	plppr2a	phospholipid phosphatase related 2a [Source:ZFIN%3BAcc:ZDB-GENE-040426-1171]	GO:0046839:phospholipid dephosphorylation;GO:0006644:phospholipid metabolic process;GO:0051491:positive regulation of filopodium assembly;GO:0010976:positive regulation of neuron projection development;	GO:0005887:integral component of plasma membrane;GO:0005886:plasma membrane;	GO:0042577:lipid phosphatase activity;GO:0016791:phosphatase activity;GO:0008195:phosphatidate phosphatase activity;	K19581	-
ENSDARG00000109271	1795	0	0	0	0	0	0	0	0	12	0.62	2	0.09	3.14198	5.33975	2.32276	2.29888	0.0215117	0.999831	Ups	12	46425800	46447830	+	BX005305.1	legumain-like [Source:NCBI gene%3BAcc:100005220]	-	-	-	K01369	;ko04142 Lysosome;ko04612 Antigen processing and presentation;
ENSDARG00000069852	1530	127	5.33	18	0.94	156	6.42	19	1.05	19	1.14	11	0.56	48.3482	-2.01685	0.877434	-2.29857	0.0215292	0.999831	Down	15	4957784	4969525	-	lipt2	lipoyl(octanoyl) transferase 2 [Source:NCBI gene%3BAcc:664765]	GO:2000376:positive regulation of oxygen metabolic process;GO:0009249:protein lipoylation;	GO:0005739:mitochondrion;	GO:0016874:ligase activity;GO:0033819:lipoyl(octanoyl) transferase activity;	K03801	;ko00785 Lipoic acid metabolism;ko01100 Metabolic pathways;ko01240 Biosynthesis of cofactors;
ENSDARG00000096266	1453	0	0	0	0	1	0.04	1	0.06	3	0.19	13	0.7	2.97927	4.26943	1.86355	2.29102	0.0219621	0.999831	Ups	3	28801366	28905492	-	BX510989.1	-	-	-	-	-	-
ENSDARG00000023542	2772	20	0.46	3	0.09	32	0.73	3	0.09	0	0	2	0.06	7.9525	-3.01321	1.31736	-2.28732	0.0221772	0.999831	Down	2	27010439	27094653	+	cdh7a	cadherin 7a [Source:ZFIN%3BAcc:ZDB-GENE-061019-3]	GO:0034332:adherens junction organization;GO:0016339:calcium-dependent cell-cell adhesion via plasma membrane cell adhesion molecules;GO:0001502:cartilage condensation;GO:0016477:cell migration;GO:0000902:cell morphogenesis;GO:0098609:cell-cell adhesion;GO:0044331:cell-cell adhesion mediated by cadherin;GO:0007043:cell-cell junction assembly;GO:0060591:chondroblast differentiation;GO:0007156:homo…	GO:0016342:catenin complex;GO:0009986:cell surface;GO:0005913:cell-cell adherens junction;GO:0016021:integral component of membrane;GO:0005886:plasma membrane;	GO:0045296:cadherin binding;GO:0005509:calcium ion binding;GO:0008092:cytoskeletal protein binding;GO:0042803:protein homodimerization activity;	K06799	-
ENSDARG00000090319	1831	201	7.04	5	0.22	180	6.19	19	0.87	0	0	17	0.73	54.4896	-2.99185	1.30812	-2.28714	0.0221875	0.999831	Down	14	17397534	17416730	+	rnf212	ring finger protein 212 [Source:ZFIN%3BAcc:ZDB-GENE-110208-6]	-	-	-	-	-
ENSDARG00000024492	3866	4	0.07	8	0.17	0	0	119	2.59	6	0.14	1	0.02	25.2855	3.68789	1.61503	2.28349	0.0224016	0.999831	Ups	19	38422059	38467554	+	col9a2	procollagen%2C type IX%2C alpha 2 [Source:ZFIN%3BAcc:ZDB-GENE-030131-9786]	GO:0001568:blood vessel development;GO:0007155:cell adhesion;GO:0016477:cell migration;GO:0032964:collagen biosynthetic process;GO:0030199:collagen fibril organization;GO:0030198:extracellular matrix organization;GO:0048592:eye morphogenesis;GO:0003007:heart morphogenesis;GO:0045112:integrin biosynthetic process;GO:1903225:negative regulation of endodermal cell differentiation;GO:0051128:regulati…	GO:0005604:basement membrane;GO:0005581:collagen trimer;GO:0005588:collagen type V trimer;GO:0031012:extracellular matrix;GO:0005615:extracellular space;	GO:0005201:extracellular matrix structural constituent;GO:0008201:heparin binding;GO:0048407:platelet-derived growth factor binding;GO:0043394:proteoglycan binding;	K08131	;ko04151 PI3K-Akt signaling pathway;ko04510 Focal adhesion;ko04512 ECM-receptor interaction;ko04974 Protein digestion and absorption;ko05165 Human papillomavirus infection;
ENSDARG00000067851	1142	3	0.17	4	0.28	8	0.44	0	0	0	0	0	0	2.09326	-4.34011	1.90134	-2.28265	0.0224508	0.999831	Down	5	65991152	66001200	+	lcn15	lipocalin 15 [Source:ZFIN%3BAcc:ZDB-GENE-060825-349]	-	-	-	-	-
ENSDARG00000008849	7179	5	0.04	5	0.06	8	0.07	48	0.56	3	0.04	25	0.27	15.7911	2.4175	1.05967	2.28137	0.0225266	0.999831	Ups	18	6319447	6406609	+	ptprq	protein tyrosine phosphatase receptor type Q [Source:ZFIN%3BAcc:ZDB-GENE-050419-183]	GO:0045598:regulation of fat cell differentiation;	GO:0016021:integral component of membrane;	GO:0004725:protein tyrosine phosphatase activity;	K16910	-
ENSDARG00000111465	2283	7	0.2	10	0.35	4	0.11	0	0	1	0.04	0	0	3.30715	-3.92187	1.71913	-2.28131	0.02253	0.999831	Down	4	43904209	43919994	-	znf1104	zinc finger protein 1104 [Source:ZFIN%3BAcc:ZDB-GENE-110913-152]	-	GO:0005634:nucleus;	GO:0003677:DNA binding;GO:0046872:metal ion binding;GO:0000981:sequence-specific DNA binding RNA polymerase II transcription factor activity;	K09228	;ko05168 Herpes simplex virus 1 infection;
ENSDARG00000032238	4454	266	3.83	39	0.7	115	1.63	15	0.28	31	0.64	35	0.61	68.811	-1.80592	0.791889	-2.28052	0.0225769	0.999831	Down	20	14817630	14925281	-	dnm3a	dynamin 3a [Source:ZFIN%3BAcc:ZDB-GENE-040724-76]	GO:0019886:antigen processing and presentation of exogenous peptide antigen via MHC class II;GO:0035904:aorta development;GO:0071245:cellular response to carbon monoxide;GO:1903351:cellular response to dopamine;GO:0006897:endocytosis;GO:0046847:filopodium assembly;GO:0061002:negative regulation of dendritic spine morphogenesis;GO:0051491:positive regulation of filopodium assembly;GO:1903423:posit…	GO:0030424:axon;GO:0005813:centrosome;GO:0045334:clathrin-coated endocytic vesicle;GO:0005905:coated pit;GO:0005737:cytoplasm;GO:0031410:cytoplasmic vesicle;GO:0043197:dendritic spine;GO:0044327:dendritic spine head;GO:0070062:extracellular exosome;GO:0005794:Golgi apparatus;GO:0016020:membrane;GO:0005874:microtubule;GO:0048471:perinuclear region of cytoplasm;GO:0001917:photoreceptor inner segmen…	GO:0031749:D2 dopamine receptor binding;GO:0019899:enzyme binding;GO:0005525:GTP binding;GO:0003924:GTPase activity;GO:0042802:identical protein binding;GO:0008017:microtubule binding;GO:0050998:nitric-oxide synthase binding;GO:0031798:type 1 metabotropic glutamate receptor binding;GO:0031802:type 5 metabotropic glutamate receptor binding;	K01528	;ko04072 Phospholipase D signaling pathway;ko04144 Endocytosis;ko04721 Synaptic vesicle cycle;ko04961 Endocrine and other factor-regulated calcium reabsorption;ko05100 Bacterial invasion of epithelial cells;
ENSDARG00000039682	1863	28	0.96	70	3	30	1.01	7	0.32	7	0.35	13	0.55	24.1534	-1.96587	0.862893	-2.27824	0.0227125	0.999831	Down	20	7070634	7080470	-	si:ch211-121a2.2	si:ch211-121a2.2 [Source:ZFIN%3BAcc:ZDB-GENE-070705-21]	GO:0006470:protein dephosphorylation;	GO:0005737:cytoplasm;	GO:0004725:protein tyrosine phosphatase activity;GO:0008138:protein tyrosine/serine/threonine phosphatase activity;	-	-
ENSDARG00000092870	827	74	5.74	383	37.04	598	45.52	320	32.59	1164	129.59	1717	162.48	745.424	1.95388	0.859412	2.27351	0.0229953	0.999831	Ups	9	30245637	30248034	-	BX936337.1	-	-	-	-	-	-
ENSDARG00000098712	1926	0	0	0	0	0	0	0	0	4	0.19	11	0.45	2.60026	5.0899	2.23967	2.27261	0.0230494	0.999831	Ups	5	57430675	57437718	-	CR925761.1	si:ch211-69i3.3 [Source:NCBI gene%3BAcc:100318255]	-	-	-	-	-
ENSDARG00000104654	3082	4	0.08	0	0	0	0	1	0.03	41	1.22	1	0.03	10.5184	4.32944	1.90947	2.26735	0.023369	0.999831	Ups	7	51752239	51757085	-	leap2	liver-expressed antimicrobial peptide 2 [Source:ZFIN%3BAcc:ZDB-GENE-081022-131]	-	-	-	-	-
ENSDARG00000101264	2070	1	0.03	0	0	0	0	0	0	12	0.53	6	0.23	3.86215	4.63415	2.04427	2.26689	0.0233967	0.999831	Ups	3	49103210	49110710	-	trim35-12	tripartite motif containing 35-12 [Source:ZFIN%3BAcc:ZDB-GENE-110920-4]	-	-	-	K12012	-
ENSDARG00000019304	2606	12	0.3	9	0.28	10	0.24	37	1.2	15	0.53	26	0.78	18.542	1.73915	0.767371	2.26638	0.0234282	0.999831	Ups	11	1422737	1509773	-	phactr3b	phosphatase and actin regulator 3b [Source:ZFIN%3BAcc:ZDB-GENE-050522-156]	GO:0031532:actin cytoskeleton reorganization;GO:0031032:actomyosin structure organization;GO:0043149:stress fiber assembly;	GO:0030054:cell junction;GO:0005829:cytosol;GO:0005634:nucleus;GO:0045202:synapse;GO:0016363:nuclear matrix;GO:0005654:nucleoplasm;	GO:0003779:actin binding;GO:0008157:protein phosphatase 1 binding;GO:0004864:protein phosphatase inhibitor activity;	K17594	-
ENSDARG00000116896	1988	16	0.52	91	3.66	20	0.63	18	0.76	228	10.56	339	13.35	128.348	2.43357	1.07383	2.26626	0.0234354	0.999831	Ups	8	39663612	39674183	+	TMEM233	transmembrane protein 233-like [Source:NCBI gene%3BAcc:101885033]	-	GO:0016021:integral component of membrane;GO:0016020:membrane;	-	-	-
ENSDARG00000087857	3143	3	0.06	4	0.1	3	0.06	57	1.53	2	0.06	4	0.1	12.9859	3.02397	1.33588	2.26366	0.0235951	0.999831	Ups	12	3998764	4028079	-	si:ch211-180a12.2	si:ch211-180a12.2 [Source:ZFIN%3BAcc:ZDB-GENE-121214-236]	-	-	-	-	-
ENSDARG00000037905	7101	94	0.85	74	0.83	30	0.27	11	0.13	2	0.03	26	0.29	34.1989	-2.09395	0.925153	-2.26336	0.0236136	0.999831	Down	3	33773156	33901483	-	cacna1aa	calcium channel%2C voltage-dependent%2C P/Q type%2C alpha 1A subunit%2C a [Source:ZFIN%3BAcc:ZDB-GENE-040724-26]	GO:0070509:calcium ion import;GO:0070588:calcium ion transmembrane transport;GO:0006816:calcium ion transport;GO:0008219:cell death;GO:0007268:synaptic transmission;GO:0051899:membrane depolarization;GO:0050804:regulation of synaptic transmission;GO:0007204:positive regulation of cytosolic calcium ion concentration;GO:0050796:regulation of insulin secretion;GO:0034765:regulation of ion transmembr…	GO:0042995:cell projection;GO:0005737:cytoplasm;GO:0016021:integral component of membrane;GO:0043025:neuronal cell body;GO:0005634:nucleus;GO:0005886:plasma membrane;GO:0005891:voltage-gated calcium channel complex;GO:0043204:perikaryon;GO:0032991:macromolecular complex;	GO:0001540:beta-amyloid binding;GO:0008331:high voltage-gated calcium channel activity;GO:0046872:metal ion binding;GO:0019905:syntaxin binding;GO:0005245:voltage-gated calcium channel activity;GO:0005516:calmodulin binding;	K04344	;ko04010 MAPK signaling pathway;ko04020 Calcium signaling pathway;ko04721 Synaptic vesicle cycle;ko04723 Retrograde endocannabinoid signaling;ko04724 Glutamatergic synapse;ko04725 Cholinergic synapse;ko04726 Serotonergic synapse;ko04727 GABAergic synapse;ko04728 Dopaminergic synapse;ko04730 Long-term depression;ko04742 Taste transduction;ko04930 Type II diabetes mellitus;ko05017 Spinocerebellar a…
ENSDARG00000019920	1381	1	0.05	0	0	66	3.01	1	0.06	0	0	1	0.06	9.12911	-4.65294	2.05603	-2.26307	0.0236316	0.999831	Down	20	35073981	35076387	-	lft1	lefty1 [Source:ZFIN%3BAcc:ZDB-GENE-990630-10]	-	-	-	K04668	;ko04350 TGF-beta signaling pathway;ko04550 Signaling pathways regulating pluripotency of stem cells;
ENSDARG00000017055	1754	9	0.33	4	0.18	17	0.61	0	0	1	0.05	1	0.04	4.37762	-3.42524	1.51436	-2.26185	0.023707	0.999831	Down	8	26902358	26918516	-	zmynd12	zinc finger%2C MYND-type containing 12 [Source:ZFIN%3BAcc:ZDB-GENE-041114-133]	-	-	-	-	-
ENSDARG00000097193	1510	4	0.17	2	0.11	0	0	12	0.67	15	0.91	4	0.21	7.1766	2.94364	1.30171	2.26136	0.0237368	0.999831	Ups	6	40422224	40429414	-	si:dkey-28n18.9	si:dkey-28n18.9 [Source:ZFIN%3BAcc:ZDB-GENE-131127-205]	-	-	-	-	-
ENSDARG00000062376	4438	2	0.03	0	0	1	0.01	4	0.08	4	0.08	13	0.23	4.00544	3.22	1.42419	2.26094	0.0237632	0.999831	Ups	5	23283890	23317477	-	nlgn3b	neuroligin 3b [Source:ZFIN%3BAcc:ZDB-GENE-060526-197]	GO:0030534:adult behavior;GO:0048675:axon extension;GO:0060079:regulation of excitatory postsynaptic membrane potential;GO:0060080:regulation of inhibitory postsynaptic membrane potential;GO:0007612:learning;GO:0060291:long-term synaptic potentiation;GO:0050804:regulation of synaptic transmission;GO:0061002:negative regulation of dendritic spine morphogenesis;GO:0090394:negative regulation of exc…	GO:0030054:cell junction;GO:0009986:cell surface;GO:0030139:endocytic vesicle;GO:0060076:excitatory synapse;GO:0060077:inhibitory synapse;GO:0005887:integral component of plasma membrane;GO:0043025:neuronal cell body;GO:0098793:presynapse;GO:0045202:synapse;	GO:0050839:cell adhesion molecule binding;GO:0042043:neurexin family protein binding;GO:0097110:scaffold protein binding;GO:0038023:signaling receptor activity;	K07378	;ko04514 Cell adhesion molecules;
ENSDARG00000018478	2211	0	0	0	0	0	0	1	0.04	2	0.08	8	0.28	1.85961	4.61673	2.0438	2.25889	0.0238901	0.999831	Ups	2	22676743	22688651	-	agxtb	alanine--glyoxylate and serine--pyruvate aminotransferase b [Source:ZFIN%3BAcc:ZDB-GENE-010302-3]	GO:0019265:glycine biosynthetic process, by transamination of glyoxylate;GO:0009436:glyoxylate catabolic process;GO:0042853:L-alanine catabolic process;GO:0019448:L-cysteine catabolic process;GO:0007219:Notch signaling pathway;GO:0046724:oxalic acid secretion;GO:0042866:pyruvate biosynthetic process;GO:0051591:response to cAMP;GO:0051384:response to glucocorticoid;	GO:0005759:mitochondrial matrix;GO:0005739:mitochondrion;GO:0005782:peroxisomal matrix;GO:0005777:peroxisome;	GO:0008453:alanine-glyoxylate transaminase activity;GO:0016597:amino acid binding;GO:0042803:protein homodimerization activity;GO:0043621:protein self-association;GO:0030170:pyridoxal phosphate binding;GO:0004760:serine-pyruvate transaminase activity;GO:0005102:receptor binding;	K00830	;ko00250 Alanine, aspartate and glutamate metabolism;ko00260 Glycine, serine and threonine metabolism;ko00630 Glyoxylate and dicarboxylate metabolism;ko00680 Methane metabolism;ko01100 Metabolic pathways;ko01110 Biosynthesis of secondary metabolites;ko01120 Microbial metabolism in diverse environments;ko01200 Carbon metabolism;ko04146 Peroxisome;
ENSDARG00000095883	1322	7	0.34	0	0	5	0.24	72	4.59	0	0	30	1.78	19.2308	3.55186	1.57459	2.25575	0.0240866	0.999831	Ups	16	6512481	6556439	-	BX001026.1	-	-	-	-	-	-
ENSDARG00000069046	1641	1397	54.61	2883	140.5	674	25.86	43	2.21	23	1.29	806	38.44	882.739	-2.47481	1.09796	-2.25401	0.0241956	0.999831	Down	1	59163060	59169815	-	wu:fk65c09	wu:fk65c09 [Source:ZFIN%3BAcc:ZDB-GENE-030131-7018]	-	-	-	-	-
ENSDARG00000093317	1447	15	0.67	76	4.2	5	0.22	1	0.06	5	0.32	5	0.27	17.5679	-2.87695	1.27641	-2.25393	0.0242005	0.999831	Down	23	18904674	18913072	-	si:ch211-209j10.6	si:ch211-209j10.6 [Source:ZFIN%3BAcc:ZDB-GENE-090311-44]	-	-	-	K12473	;ko04144 Endocytosis;ko04913 Ovarian steroidogenesis;ko04925 Aldosterone synthesis and secretion;ko04927 Cortisol synthesis and secretion;ko04934 Cushing syndrome;ko04976 Bile secretion;ko04979 Cholesterol metabolism;ko05145 Toxoplasmosis;ko05160 Hepatitis C;
ENSDARG00000088251	1495	227	9.74	255	13.64	146	6.15	63	3.55	1496	92.13	372	19.47	511.564	2.2306	0.989933	2.25328	0.0242413	0.999831	Ups	15	17059622	17074393	-	lgals17	galectin 17 [Source:ZFIN%3BAcc:ZDB-GENE-131121-418]	-	-	-	-	-
ENSDARG00000099956	769	10	0.83	8	0.83	22	1.8	3	0.33	0	0	1	0.1	6.153	-2.91679	1.29473	-2.25282	0.0242705	0.999831	Down	14	21684475	21685568	-	CT955967.1	-	-	-	-	-	-
ENSDARG00000098373	696	0	0	1	0.11	0	0	0	0	29	3.84	0	0	7.03788	5.515	2.44878	2.25214	0.0243134	0.999831	Ups	5	54313824	54316597	-	BX276102.1	-	-	-	-	-	-
ENSDARG00000105161	5211	57	0.7	14	0.21	23	0.28	0	0	6	0.11	0	0	13.6249	-3.19691	1.42042	-2.25068	0.0244061	0.999831	Down	4	40035564	40059426	+	si:ch211-238e22.8	si:ch211-238e22.8 [Source:ZFIN%3BAcc:ZDB-GENE-050419-231]	GO:0006919:activation of cysteine-type endopeptidase activity involved in apoptotic process;GO:0071345:cellular response to cytokine stimulus;GO:0036336:dendritic cell migration;GO:0050710:negative regulation of cytokine secretion;GO:0070373:negative regulation of ERK1 and ERK2 cascade;GO:0043124:negative regulation of I-kappaB kinase/NF-kappaB signaling;GO:0050728:negative regulation of inflamma…	GO:0005737:cytoplasm;	GO:0005524:ATP binding;GO:0008656:cysteine-type endopeptidase activator activity involved in apoptotic process;	K12800	;ko04217 Necroptosis;ko04621 NOD-like receptor signaling pathway;ko04625 C-type lectin receptor signaling pathway;ko05130 Pathogenic Escherichia coli infection;ko05131 Shigellosis;ko05132 Salmonella infection;ko05133 Pertussis;ko05135 Yersinia infection;ko05164 Influenza A;ko05171 Coronavirus disease - COVID-19;
ENSDARG00000075727	1274	4	0.2	29	1.82	9	0.44	4	0.26	32	2.31	260	15.97	54.008	2.85214	1.26796	2.2494	0.0244872	0.999831	Ups	14	45406299	45422778	+	map1lc3cl	microtubule-associated protein 1 light chain 3 gamma%2C like [Source:ZFIN%3BAcc:ZDB-GENE-140819-1]	GO:0035973:aggrephagy;GO:0000045:autophagosome assembly;GO:0097352:autophagosome maturation;GO:0000422:mitochondrion degradation;GO:0006995:cellular response to nitrogen starvation;GO:0009267:cellular response to starvation;GO:0016236:macroautophagy;	GO:0005776:autophagosome;GO:0000421:autophagosome membrane;GO:0036464:cytoplasmic ribonucleoprotein granule;GO:0031410:cytoplasmic vesicle;GO:0005829:cytosol;GO:0012505:endomembrane system;GO:0005874:microtubule;GO:0031090:organelle membrane;	GO:0008017:microtubule binding;GO:0031625:ubiquitin protein ligase binding;	-	-
ENSDARG00000092918	1914	5	0.17	50	2.09	27	0.89	1	0.04	2	0.1	8	0.33	14.5607	-2.73725	1.21693	-2.2493	0.0244933	0.999831	Down	14	32783972	32788046	+	crhr2	corticotropin releasing hormone receptor 2 [Source:NCBI gene%3BAcc:100002312]	-	-	-	-	-
ENSDARG00000117735	5517	10	0.12	2	0.03	11	0.13	4	0.06	42	0.7	39	0.55	19.5197	2.45444	1.09361	2.24435	0.0248098	0.999831	Ups	7	980292	989868	+	CR926130.1	-	-	-	-	-	-
ENSDARG00000009612	2229	0	0	0	0	0	0	3	0.11	2	0.08	4	0.14	1.62603	4.41192	1.96833	2.24146	0.0249966	0.999831	Ups	11	24013769	24016813	-	chia.3	chitinase%2C acidic.3 [Source:ZFIN%3BAcc:ZDB-GENE-040426-2891]	GO:0006915:apoptotic process;GO:0006032:chitin catabolic process;GO:0002376:immune system process;GO:0000272:polysaccharide catabolic process;GO:0090197:positive regulation of chemokine secretion;GO:0002532:production of molecular mediator involved in inflammatory response;GO:0052356:catabolism by host of symbiont cell wall chitin;GO:0006955:immune response;GO:0001878:response to yeast;GO:0006030…	GO:0005737:cytoplasm;GO:0005576:extracellular region;GO:0005615:extracellular space;	GO:0008061:chitin binding;GO:0004568:chitinase activity;GO:0019900:kinase binding;	K01183	;ko00520 Amino sugar and nucleotide sugar metabolism;ko01100 Metabolic pathways;
ENSDARG00000074070	3129	7	0.14	0	0	18	0.36	0	0	0	0	0	0	3.19942	-4.96065	2.21904	-2.23549	0.0253849	0.999831	Down	25	36152215	36157484	+	irx5b	iroquois homeobox 5b [Source:ZFIN%3BAcc:ZDB-GENE-040628-5]	GO:0007420:brain development;GO:0030154:cell differentiation;GO:0009953:dorsal/ventral pattern formation;GO:0048701:embryonic cranial skeleton morphogenesis;GO:0008406:gonad development;GO:0009954:proximal/distal pattern formation;GO:0006355:regulation of transcription, DNA-templated;	GO:0005737:cytoplasm;GO:0005634:nucleus;	GO:0043565:sequence-specific DNA binding;	-	-
ENSDARG00000104422	692	14	1.3	1	0.12	11	1	1	0.12	0	0	0	0	3.46737	-4.04216	1.80822	-2.23544	0.0253888	0.999831	Down	16	21851856	21853082	-	si:ch73-34h11.1	si:ch73-34h11.1 [Source:ZFIN%3BAcc:ZDB-GENE-131120-162]	-	-	-	-	-
ENSDARG00000097011	651	133	13.11	445	54.67	61	5.9	109	14.1	1594	225.44	695	83.55	601.917	2.32815	1.04259	2.23305	0.0255457	0.999831	Ups	3	55100045	55100936	+	hbaa1	hemoglobin%2C alpha adult 1 [Source:NCBI gene%3BAcc:30507]	GO:0030097:hemopoiesis;GO:0042744:hydrogen peroxide catabolic process;GO:0001666:response to hypoxia;	GO:0031838:haptoglobin-hemoglobin complex;GO:0005833:hemoglobin complex;	GO:0020037:heme binding;GO:0005506:iron ion binding;GO:0043177:organic acid binding;GO:0019825:oxygen binding;GO:0005344:oxygen transporter activity;	K13826	-
ENSDARG00000070755	1330	24	1.16	0	0	4	0.19	0	0	0	0	0	0	3.3826	-5.04373	2.25955	-2.23218	0.025603	0.999831	Down	16	7697878	7699207	+	ccr11.1	chemokine (C-C motif) receptor 11.1 [Source:ZFIN%3BAcc:ZDB-GENE-070302-5]	-	-	-	K04177	;ko04060 Cytokine-cytokine receptor interaction;ko04061 Viral protein interaction with cytokine and cytokine receptor;ko04062 Chemokine signaling pathway;
ENSDARG00000104016	9155	591	4.14	2125	18.56	219	1.51	35	0.32	34	0.34	484	4.14	550.012	-2.40566	1.07979	-2.22789	0.0258878	0.999831	Down	18	50650512	50672516	+	si:dkey-151j17.4	si:dkey-151j17.4 [Source:ZFIN%3BAcc:ZDB-GENE-141222-13]	-	-	-	-	-
ENSDARG00000103208	2685	4	0.1	0	0	0	0	4	0.13	22	0.75	3	0.09	6.87134	3.65519	1.64311	2.22456	0.026111	0.999831	Ups	4	57580303	57585518	+	il17ra1b	interleukin 17 receptor A1b [Source:ZFIN%3BAcc:ZDB-GENE-110914-185]	-	-	-	K05164	;ko04060 Cytokine-cytokine receptor interaction;ko04657 IL-17 signaling pathway;
ENSDARG00000004243	2316	0	0	0	0	0	0	13	0.47	0	0	2	0.07	2.68965	5.13869	2.31313	2.22153	0.0263153	0.999831	Ups	6	13606410	13688991	+	asic4b	acid-sensing (proton-gated) ion channel family member 4b [Source:NCBI gene%3BAcc:407667]	GO:0048545:response to steroid hormone;	GO:0005887:integral component of plasma membrane;	GO:0005261:cation channel activity;GO:0005272:sodium channel activity;	K04831	;ko04750 Inflammatory mediator regulation of TRP channels;
ENSDARG00000103826	1908	387	13.01	1110	46.53	8	0.26	115	5.08	53	2.56	18	0.74	273.463	-2.70444	1.21901	-2.21854	0.0265178	0.999831	Down	18	402048	423921	+	gpib	glucose-6-phosphate isomerase b [Source:ZFIN%3BAcc:ZDB-GENE-020513-3]	GO:0061621:canonical glycolysis;GO:0005975:carbohydrate metabolic process;GO:0006094:gluconeogenesis;GO:0051156:glucose 6-phosphate metabolic process;GO:0006096:glycolytic process;GO:0007599:hemostasis;GO:0006959:humoral immune response;GO:0043312:neutrophil degranulation;GO:0010595:positive regulation of endothelial cell migration;GO:0051024:positive regulation of immunoglobulin secretion;	GO:0005829:cytosol;GO:0070062:extracellular exosome;GO:0005576:extracellular region;GO:0016020:membrane;GO:0005654:nucleoplasm;GO:0005886:plasma membrane;GO:0034774:secretory granule lumen;	GO:0005125:cytokine activity;GO:0004347:glucose-6-phosphate isomerase activity;GO:0008083:growth factor activity;GO:0016866:intramolecular transferase activity;GO:0048029:monosaccharide binding;GO:0031625:ubiquitin protein ligase binding;	K01810	;ko00010 Glycolysis / Gluconeogenesis;ko00030 Pentose phosphate pathway;ko00500 Starch and sucrose metabolism;ko00520 Amino sugar and nucleotide sugar metabolism;ko01100 Metabolic pathways;ko01110 Biosynthesis of secondary metabolites;ko01120 Microbial metabolism in diverse environments;ko01200 Carbon metabolism;
ENSDARG00000114229	1141	0	0	0	0	1	0.06	15	1.11	1	0.08	1	0.07	3.27516	4.39921	1.98372	2.21766	0.0265778	0.999831	Ups	20	52702012	52705325	-	si:ch211-221n20.7	si:ch211-221n20.7 [Source:ZFIN%3BAcc:ZDB-GENE-041014-229]	-	-	-	-	-
ENSDARG00000097269	527	13	1.58	0	0	11	1.31	0	0	0	0	0	0	2.99343	-4.86704	2.196	-2.21633	0.0266692	0.999831	Down	3	41531279	41535761	-	si:ch211-222n22.1	si:ch211-222n22.1 [Source:ZFIN%3BAcc:ZDB-GENE-131121-417]	-	-	-	-	-
ENSDARG00000061379	8745	57	0.42	66	0.6	42	0.3	1	0.01	373	3.93	434	3.88	177.328	2.70429	1.22049	2.21574	0.0267093	0.999831	Ups	5	51848756	51884775	+	cmya5	cardiomyopathy associated 5 [Source:ZFIN%3BAcc:ZDB-GENE-070630-1]	-	-	-	-	-
ENSDARG00000099065	637	13	1.31	1	0.13	29	2.87	1	0.13	0	0	2	0.25	6.01509	-3.42443	1.5485	-2.21145	0.0270047	0.999831	Down	7	47226092	47243579	-	BX323051.1	-	-	-	-	-	-
ENSDARG00000078119	2859	8	0.18	41	1.15	93	2.05	2	0.06	6	0.19	13	0.36	23.9359	-2.42578	1.09763	-2.21001	0.0271046	0.999831	Down	12	19205086	19232997	+	sh3bp1	SH3-domain binding protein 1 [Source:ZFIN%3BAcc:ZDB-GENE-121128-2]	GO:0051058:negative regulation of small GTPase mediated signal transduction;GO:0043547:positive regulation of GTPase activity;GO:0007165:signal transduction;	GO:0005829:cytosol;GO:0019897:extrinsic component of plasma membrane;	GO:0005096:GTPase activator activity;GO:1990450:linear polyubiquitin binding;	-	-
ENSDARG00000077610	1224	3	0.16	27	1.76	13	0.67	2	0.14	1	0.08	2	0.13	7.59148	-2.86224	1.2959	-2.20868	0.0271967	0.999831	Down	22	34691020	34698979	+	hykk.1	hydroxylysine kinase%2C tandem duplicate 1 [Source:ZFIN%3BAcc:ZDB-GENE-131120-24]	-	GO:0005737:cytoplasm;	GO:0047992:hydroxylysine kinase activity;GO:0016301:kinase activity;	K18201	;ko00310 Lysine degradation;ko01100 Metabolic pathways;
ENSDARG00000090428	1918	0	0	0	0	0	0	1	0.04	4	0.19	4	0.16	1.73205	4.48605	2.03112	2.20866	0.0271981	0.999831	Ups	7	35075847	35079299	+	ctrb1	chymotrypsinogen B1 [Source:ZFIN%3BAcc:ZDB-GENE-030131-1171]	GO:0007586:digestion;	GO:0005615:extracellular space;	GO:0004252:serine-type endopeptidase activity;	K01310	;ko04972 Pancreatic secretion;ko04974 Protein digestion and absorption;
ENSDARG00000095125	1683	20	0.76	41	1.95	21	0.79	3	0.15	5	0.27	8	0.37	15.0951	-2.04326	0.925572	-2.20757	0.0272742	0.999831	Down	20	26892761	26895591	+	ftr97	finTRIM family%2C member 97 [Source:ZFIN%3BAcc:ZDB-GENE-061026-1]	-	-	-	-	-
ENSDARG00000096720	531	0	0	1	0.15	0	0	1	0.16	9	1.56	3	0.44	2.93682	4.18483	1.89649	2.20662	0.0273405	0.999831	Ups	12	31608905	31612987	+	CR352342.1	-	-	-	-	-	-
ENSDARG00000103591	2644	0	0	1	0.03	1	0.02	2	0.06	5	0.17	11	0.33	3.50718	3.4927	1.58335	2.2059	0.0273913	0.999831	Ups	7	65472578	65492048	-	dkk3a	dickkopf WNT signaling pathway inhibitor 3a [Source:ZFIN%3BAcc:ZDB-GENE-110519-1]	-	-	-	-	-
ENSDARG00000098223	1324	3	0.15	19	1.15	0	0	0	0	0	0	0	0	3.60861	-5.11755	2.32024	-2.20562	0.0274108	0.999831	Down	16	35821321	35824708	-	AL773558.1	-	-	-	-	-	-
ENSDARG00000060034	2515	1	0.03	0	0	1	0.03	1	0.03	5	0.18	13	0.4	3.57187	3.65398	1.65755	2.20445	0.0274925	0.999831	Ups	20	51312883	51334529	+	tmem151ba	transmembrane protein 151Ba [Source:NCBI gene%3BAcc:100006371]	-	GO:0016021:integral component of membrane;	-	-	-
ENSDARG00000094669	825	2	0.16	0	0	1	0.08	25	2.55	0	0	6	0.57	5.86561	3.83253	1.7446	2.1968	0.0280349	0.999831	Ups	9	14304447	14352782	-	BX510337.1	-	-	-	-	-	-
ENSDARG00000096587	3037	38	0.8	60	1.58	16	0.33	0	0	8	0.24	0	0	18.7887	-3.22042	1.46787	-2.19394	0.02824	0.999831	Down	12	4147714	4167750	+	itgam	integrin%2C alpha M (complement component 3 receptor 3 subunit) [Source:ZFIN%3BAcc:ZDB-GENE-110510-4]	-	-	-	K06462	;ko04610 Complement and coagulation cascades;ko04810 Regulation of actin cytoskeleton;ko05152 Tuberculosis;
ENSDARG00000042010	1787	0	0	0	0	3	0.11	6	0.28	5	0.26	11	0.48	4.33406	3.28596	1.49809	2.19343	0.0282765	0.999831	Ups	16	54450407	54455573	-	pklr	pyruvate kinase L/R [Source:ZFIN%3BAcc:ZDB-GENE-010907-1]	-	-	GO:0005524:ATP binding;GO:0016301:kinase activity;GO:0000287:magnesium ion binding;GO:0030955:potassium ion binding;GO:0004743:pyruvate kinase activity;	K00873	;ko00010 Glycolysis / Gluconeogenesis;ko00230 Purine metabolism;ko00620 Pyruvate metabolism;ko01100 Metabolic pathways;ko01110 Biosynthesis of secondary metabolites;ko01120 Microbial metabolism in diverse environments;ko01200 Carbon metabolism;ko01230 Biosynthesis of amino acids;ko01240 Biosynthesis of cofactors;ko04922 Glucagon signaling pathway;ko04930 Type II diabetes mellitus;ko05165 Human pa…
ENSDARG00000068819	1430	26	1.17	1	0.06	27	1.19	3	0.18	0	0	1	0.05	7.51687	-3.25118	1.48365	-2.19134	0.0284274	0.999831	Down	10	34151286	34171425	+	BX548044.2	serine protease HTRA2%2C mitochondrial-like [Source:NCBI gene%3BAcc:560917]	GO:0008344:adult locomotory behavior;GO:0007628:adult walking behavior;GO:0007568:aging;GO:0044257:cellular protein catabolic process;GO:0071363:cellular response to growth factor stimulus;GO:0034605:cellular response to heat;GO:0035458:cellular response to interferon-beta;GO:0034599:cellular response to oxidative stress;GO:0071300:cellular response to retinoic acid;GO:0006672:ceramide metabolic …	GO:0035631:CD40 receptor complex;GO:0000785:chromatin;GO:0009898:cytoplasmic side of plasma membrane;GO:0005856:cytoskeleton;GO:0005829:cytosol;GO:0016020:membrane;GO:0005758:mitochondrial intermembrane space;GO:0031966:mitochondrial membrane;GO:0005739:mitochondrion;GO:0005634:nucleus;	GO:0042802:identical protein binding;GO:0008233:peptidase activity;GO:0004252:serine-type endopeptidase activity;GO:0008236:serine-type peptidase activity;	K08669	;ko04210 Apoptosis;ko04214 Apoptosis - fly;ko04215 Apoptosis - multiple species;ko05012 Parkinson disease;ko05022 Pathways of neurodegeneration - multiple diseases;
ENSDARG00000087519	497	19	2.45	8	1.29	19	2.41	2	0.34	1	0.19	4	0.63	7.33379	-2.30752	1.05311	-2.19115	0.0284412	0.999831	Down	16	50240323	50254974	+	CU693446.1	-	-	-	-	-	-
ENSDARG00000068264	1413	77	3.5	40	2.26	55	2.45	68	4.05	85	5.54	148	8.2	78.1062	1.23766	0.565568	2.18834	0.0286447	0.999831	Ups	14	44777478	44790817	-	grhpra	glyoxylate reductase/hydroxypyruvate reductase a [Source:ZFIN%3BAcc:ZDB-GENE-040724-230]	GO:0034641:cellular nitrogen compound metabolic process;GO:0043648:dicarboxylic acid metabolic process;GO:0007588:excretion;GO:0046487:glyoxylate metabolic process;GO:0055114:oxidation-reduction process;GO:0051259:protein oligomerization;	GO:0005737:cytoplasm;GO:0005829:cytosol;GO:0070062:extracellular exosome;GO:0005782:peroxisomal matrix;	GO:0031406:carboxylic acid binding;GO:0008465:glycerate dehydrogenase activity;GO:0030267:glyoxylate reductase (NADP) activity;GO:0016618:hydroxypyruvate reductase activity;GO:0051287:NAD binding;GO:0070402:NADPH binding;GO:0016616:oxidoreductase activity, acting on the CH-OH group of donors, NAD or NADP as acceptor;GO:0042803:protein homodimerization activity;	K00049	;ko00260 Glycine, serine and threonine metabolism;ko00620 Pyruvate metabolism;ko00630 Glyoxylate and dicarboxylate metabolism;ko01100 Metabolic pathways;ko01110 Biosynthesis of secondary metabolites;ko01120 Microbial metabolism in diverse environments;
ENSDARG00000054373	1261	10	0.51	59	3.74	27	1.35	41	2.74	105	7.67	169	10.49	72.6315	1.96994	0.901322	2.18561	0.0288439	0.999831	Ups	8	13572531	13574764	-	b3gnt3.2	UDP-GlcNAc:betaGal beta-1%2C3-N-acetylglucosaminyltransferase 3%2C tendem duplicate 2 [Source:ZFIN%3BAcc:ZDB-GENE-081104-528]	GO:0018146:keratan sulfate biosynthetic process;GO:0016266:O-glycan processing;GO:0030311:poly-N-acetyllactosamine biosynthetic process;GO:0006486:protein glycosylation;	GO:0005783:endoplasmic reticulum;GO:0005794:Golgi apparatus;GO:0000139:Golgi membrane;GO:0005887:integral component of plasma membrane;	GO:0008376:acetylgalactosaminyltransferase activity;GO:0047223:beta-1,3-galactosyl-O-glycosyl-glycoprotein beta-1,3-N-acetylglucosaminyltransferase activity;GO:0008378:galactosyltransferase activity;GO:0008532:N-acetyllactosaminide beta-1,3-N-acetylglucosaminyltransferase activity;	K07970	;ko00601 Glycosphingolipid biosynthesis - lacto and neolacto series;ko01100 Metabolic pathways;
ENSDARG00000036820	4532	144	2.04	145	2.56	102	1.42	110	2.04	337	6.85	314	5.42	202.564	1.41091	0.6457	2.18508	0.0288828	0.999831	Ups	8	26292560	26326501	+	mgll	monoglyceride lipase [Source:ZFIN%3BAcc:ZDB-GENE-031006-9]	GO:0036155:acylglycerol acyl-chain remodeling;GO:0046464:acylglycerol catabolic process;GO:0019369:arachidonic acid metabolic process;GO:0006633:fatty acid biosynthetic process;GO:0006954:inflammatory response;GO:0006629:lipid metabolic process;GO:0052651:monoacylglycerol catabolic process;GO:2000124:regulation of endocannabinoid signaling pathway;GO:0050727:regulation of inflammatory response;GO…	GO:0005829:cytosol;GO:0005789:endoplasmic reticulum membrane;GO:0019898:extrinsic component of membrane;GO:0016020:membrane;GO:0005654:nucleoplasm;GO:0005886:plasma membrane;	GO:0047372:acylglycerol lipase activity;GO:0004622:lysophospholipase activity;GO:0042803:protein homodimerization activity;	K01054	;ko00561 Glycerolipid metabolism;ko01100 Metabolic pathways;ko04714 Thermogenesis;ko04723 Retrograde endocannabinoid signaling;ko04923 Regulation of lipolysis in adipocytes;
ENSDARG00000045811	1419	17	0.77	0	0	7	0.31	0	0	0	0	0	0	2.94374	-4.84395	2.22066	-2.18131	0.0291607	0.999831	Down	25	19041329	19045977	+	lrtm2b	leucine-rich repeats and transmembrane domains 2b [Source:ZFIN%3BAcc:ZDB-GENE-131121-544]	-	-	-	-	-
ENSDARG00000095025	733	2	0.18	2	0.22	1	0.09	2	0.23	16	2.01	7	0.75	5.91987	2.87304	1.31735	2.18093	0.0291885	0.999831	Ups	21	25747063	25748913	-	CR388166.2	-	-	-	-	-	-
ENSDARG00000036846	6630	1	0.01	4	0.05	1	0.01	6	0.08	17	0.24	6	0.07	6.9647	2.73716	1.25543	2.18026	0.0292383	0.999831	Ups	3	60812851	60827402	-	anks4b	ankyrin repeat and sterile alpha motif domain containing 4B [Source:ZFIN%3BAcc:ZDB-GENE-040704-29]	-	-	-	-	-
ENSDARG00000105746	1424	7	0.32	8	0.45	4	0.18	0	0	1	0.06	0	0	2.96489	-3.75357	1.72204	-2.17972	0.0292785	0.999831	Down	4	74445535	74466703	-	LO018124.1	si:cabz01083838.1 [Source:NCBI gene%3BAcc:101883056]	-	-	-	-	-
ENSDARG00000105188	4699	35	0.48	30	0.51	97	1.3	2	0.04	10	0.2	17	0.28	27.3414	-2.06094	0.945745	-2.17917	0.0293189	0.999831	Down	14	33788835	33824329	-	vimr2	vimentin-related 2 [Source:ZFIN%3BAcc:ZDB-GENE-160113-76]	-	-	-	-	-
ENSDARG00000044161	4474	119	1.71	1	0.02	99	1.39	12	0.23	0	0	6	0.1	30.457	-3.12585	1.43476	-2.17866	0.0293568	0.999831	Down	12	12112384	12833736	+	grid1b	glutamate receptor%2C ionotropic%2C delta 1b [Source:ZFIN%3BAcc:ZDB-GENE-121214-84]	GO:0050804:regulation of synaptic transmission;GO:0035176:social behavior;GO:0035249:synaptic transmission, glutamatergic;	GO:0030054:cell junction;GO:0070062:extracellular exosome;GO:0005886:plasma membrane;GO:0045211:postsynaptic membrane;GO:0016021:integral component of membrane;	GO:0008066:glutamate receptor activity;GO:0004970:ionotropic glutamate receptor activity;	K05206	;ko04080 Neuroactive ligand-receptor interaction;
ENSDARG00000090171	2485	4	0.1	2	0.06	1	0.03	0	0	21	0.78	24	0.76	9.52912	3.16819	1.45419	2.17866	0.029357	0.999831	Ups	8	48778961	48790587	-	BX323556.1	-	-	-	-	K12800	;ko04217 Necroptosis;ko04621 NOD-like receptor signaling pathway;ko04625 C-type lectin receptor signaling pathway;ko05130 Pathogenic Escherichia coli infection;ko05131 Shigellosis;ko05132 Salmonella infection;ko05133 Pertussis;ko05135 Yersinia infection;ko05164 Influenza A;ko05171 Coronavirus disease - COVID-19;
ENSDARG00000096995	1208	9	0.48	3	0.2	5	0.26	12	0.84	6	0.46	43	2.79	12.3302	2.16885	0.996592	2.17627	0.029535	0.999831	Ups	25	26727104	26736088	-	fbxl22	F-box and leucine-rich repeat protein 22 [Source:ZFIN%3BAcc:ZDB-GENE-050227-1]	GO:0016567:protein ubiquitination;GO:0031146:SCF-dependent proteasomal ubiquitin-dependent protein catabolic process;	GO:0019005:SCF ubiquitin ligase complex;GO:0030018:Z disc;	-	K10288	-
ENSDARG00000090708	937	3	0.21	18	1.54	0	0	0	0	0	0	0	0	3.43747	-5.04711	2.32418	-2.17157	0.0298882	0.999831	Down	17	29216367	29224911	-	si:dkey-28g23.6	si:dkey-28g23.6 [Source:ZFIN%3BAcc:ZDB-GENE-131119-80]	-	-	-	K12473	;ko04144 Endocytosis;ko04913 Ovarian steroidogenesis;ko04925 Aldosterone synthesis and secretion;ko04927 Cortisol synthesis and secretion;ko04934 Cushing syndrome;ko04976 Bile secretion;ko04979 Cholesterol metabolism;ko05145 Toxoplasmosis;ko05160 Hepatitis C;
ENSDARG00000096739	1926	13	0.43	5	0.21	5	0.16	18	0.79	6	0.29	58	2.36	16.5055	2.13827	0.985011	2.17081	0.0299452	0.999831	Ups	12	22607761	22618080	+	si:dkey-219e21.2	si:dkey-219e21.2 [Source:ZFIN%3BAcc:ZDB-GENE-141215-26]	-	-	-	-	-
ENSDARG00000070810	770	0	0	0	0	0	0	2	0.22	1	0.12	7	0.71	1.65632	4.4573	2.05443	2.1696	0.0300368	0.999831	Ups	16	5774977	5779201	+	ccka	cholecystokinin a [Source:ZFIN%3BAcc:ZDB-GENE-100922-79]	GO:0007631:feeding behavior;GO:0030252:growth hormone secretion;GO:0030072:peptide hormone secretion;	GO:0005576:extracellular region;	GO:0005179:hormone activity;	K05226	;ko04080 Neuroactive ligand-receptor interaction;ko04911 Insulin secretion;ko04972 Pancreatic secretion;
ENSDARG00000015866	1020	0	0	2	0.16	0	0	5	0.41	5	0.45	8	0.61	3.64733	3.45045	1.59634	2.16147	0.0306589	0.999831	Ups	16	23978978	23980354	+	apoa2	apolipoprotein A-II [Source:ZFIN%3BAcc:ZDB-GENE-030131-1046]	-	-	-	-	-
ENSDARG00000016570	6290	7	0.07	16	0.2	1	0.01	7	0.09	59	0.86	42	0.52	25.2714	2.55791	1.18664	2.1556	0.0311151	0.999831	Ups	21	11105007	11135942	+	prlra	prolactin receptor a [Source:ZFIN%3BAcc:ZDB-GENE-080103-2]	-	-	-	K05081	;ko04060 Cytokine-cytokine receptor interaction;ko04080 Neuroactive ligand-receptor interaction;ko04151 PI3K-Akt signaling pathway;ko04630 JAK-STAT signaling pathway;ko04917 Prolactin signaling pathway;
ENSDARG00000098365	1437	0	0	4	0.22	0	0	1	0.06	43	2.76	2	0.11	11.3506	4.02579	1.87519	2.14687	0.0318037	0.999831	Ups	5	12065957	12093618	-	lrrc74b	leucine rich repeat containing 74B [Source:ZFIN%3BAcc:ZDB-GENE-141212-96]	-	-	-	-	-
ENSDARG00000033364	1158	275	15.24	335	23.14	492	26.75	530	38.55	498	39.59	642	43.39	466.541	1.01104	0.471274	2.14533	0.0319265	0.999831	Ups	13	45476181	45482003	+	mgst3b	microsomal glutathione S-transferase 3b [Source:ZFIN%3BAcc:ZDB-GENE-061215-48]	-	-	-	K00799	;ko00480 Glutathione metabolism;ko00980 Metabolism of xenobiotics by cytochrome P450;ko00982 Drug metabolism - cytochrome P450;ko00983 Drug metabolism - other enzymes;ko01100 Metabolic pathways;ko01524 Platinum drug resistance;ko04212 Longevity regulating pathway - worm;ko05200 Pathways in cancer;ko05204 Chemical carcinogenesis;ko05225 Hepatocellular carcinoma;ko05418 Fluid shear stress and ather…
ENSDARG00000079645	2814	17	0.39	121	3.44	253	5.66	37	1.11	17	0.56	15	0.42	69.0679	-2.09919	0.978589	-2.14512	0.0319434	0.999831	Down	22	7896072	8006342	-	sc:d217	sc:d217 [Source:ZFIN%3BAcc:ZDB-GENE-080303-15]	-	-	-	-	-
ENSDARG00000091503	5563	0	0	1	0.01	1	0.01	1	0.02	11	0.18	5	0.07	3.84241	3.6011	1.67952	2.14413	0.0320227	0.999831	Ups	12	46605600	46631993	+	FADS6	fatty acid desaturase 6 [Source:NCBI gene%3BAcc:100538024]	GO:0006633:fatty acid biosynthetic process;	GO:0016021:integral component of membrane;	GO:0016491:oxidoreductase activity;	K12419	-
ENSDARG00000089901	880	0	0	34	3.09	0	0	0	0	0	0	0	0	5.81849	-5.81194	2.71662	-2.1394	0.0324033	0.999831	Down	8	22490069	22499940	+	si:ch211-261n11.8	si:ch211-261n11.8 [Source:ZFIN%3BAcc:ZDB-GENE-081105-75]	-	-	-	-	-
ENSDARG00000067646	1978	16	0.52	2	0.08	18	0.57	2	0.09	0	0	1	0.04	5.13081	-3.10965	1.45364	-2.13922	0.0324175	0.999831	Down	5	56965177	56997795	+	tmem232	transmembrane protein 232 [Source:ZFIN%3BAcc:ZDB-GENE-070705-434]	-	-	-	-	-
ENSDARG00000041797	2480	0	0	0	0	0	0	2	0.07	0	0	13	0.41	2.32124	4.94213	2.31249	2.13715	0.032586	0.999831	Ups	20	40744754	40750953	-	cx28.9	connexin 28.9 [Source:ZFIN%3BAcc:ZDB-GENE-041114-200]	GO:0007154:cell communication;	GO:0005922:connexon complex;GO:0016021:integral component of membrane;	-	K07612	-
ENSDARG00000056656	1994	279	8.98	40	1.6	149	4.7	8	0.34	18	0.83	67	2.63	75.4434	-1.91147	0.894931	-2.13589	0.0326884	0.999831	Down	7	26762717	26837282	+	tspan18a	tetraspanin 18a [Source:ZFIN%3BAcc:ZDB-GENE-040718-232]	-	GO:0005887:integral component of plasma membrane;	-	K17353	-
ENSDARG00000068865	2244	249	7.12	89	3.17	256	7.18	53	1.99	41	1.68	93	3.24	111.947	-1.23092	0.577441	-2.13168	0.0330329	0.999831	Down	4	77657660	77669219	+	si:dkey-61p9.7	si:dkey-61p9.7 [Source:ZFIN%3BAcc:ZDB-GENE-041210-241]	-	-	-	-	-
ENSDARG00000077239	2232	1	0.03	0	0	4	0.11	1	0.04	19	0.78	10	0.35	6.83037	3.21388	1.50874	2.13017	0.0331576	0.999831	Ups	4	73606482	73612754	+	si:ch211-165i18.2	si:ch211-165i18.2 [Source:ZFIN%3BAcc:ZDB-GENE-070705-77]	-	-	-	K15049	-
ENSDARG00000043557	1239	0	0	0	0	0	0	2	0.14	9	0.67	0	0	2.49861	5.00508	2.35125	2.12869	0.0332802	0.999831	Ups	20	16703050	16709138	+	kcnk13b	potassium channel%2C subfamily K%2C member 13b [Source:ZFIN%3BAcc:ZDB-GENE-040724-105]	GO:0071805:potassium ion transmembrane transport;GO:0034765:regulation of ion transmembrane transport;GO:0030322:stabilization of membrane potential;	GO:0005887:integral component of plasma membrane;GO:0005886:plasma membrane;	GO:0022841:potassium ion leak channel activity;GO:0005244:voltage-gated ion channel activity;	-	-
ENSDARG00000040735	613	10	1.05	5	0.65	4	0.41	0	0	0	0	1	0.13	2.72209	-3.67984	1.72971	-2.12743	0.0333846	0.999831	Down	9	22000812	22001778	+	crygm6	crystallin%2C gamma M6 [Source:ZFIN%3BAcc:ZDB-GENE-050516-7]	-	-	GO:0005212:structural constituent of eye lens;	-	-
ENSDARG00000043818	5034	48	0.61	12	0.19	36	0.45	13	0.22	166	3.04	79	1.23	66.0672	2.09257	0.985119	2.12418	0.0336549	0.999831	Ups	12	20699534	20785149	+	CASKIN2	si:ch211-119c20.2 [Source:ZFIN%3BAcc:ZDB-GENE-041001-137]	-	GO:0005737:cytoplasm;GO:0016020:membrane;	-	-	-
ENSDARG00000007788	5392	71	0.84	10	0.15	22	0.26	80	1.25	4	0.07	375	5.44	85.0601	2.46154	1.15951	2.12292	0.0337608	0.999831	Ups	25	19609713	19666107	-	atp2b1b	ATPase plasma membrane Ca2+ transporting 1b [Source:ZFIN%3BAcc:ZDB-GENE-080409-1]	GO:0007568:aging;GO:0007420:brain development;GO:1901660:calcium ion export;GO:1990034:calcium ion export from cell;GO:0006874:cellular calcium ion homeostasis;GO:0071386:cellular response to corticosterone stimulus;GO:0071305:cellular response to vitamin D;GO:0001818:negative regulation of cytokine production;GO:0051481:negative regulation of cytosolic calcium ion concentration;GO:0003407:neural…	GO:0045177:apical part of cell;GO:0016324:apical plasma membrane;GO:0016323:basolateral plasma membrane;GO:0030054:cell junction;GO:0009898:cytoplasmic side of plasma membrane;GO:0032590:dendrite membrane;GO:0032591:dendritic spine membrane;GO:0001772:immunological synapse;GO:0045121:membrane raft;GO:0032809:neuronal cell body membrane;GO:0005634:nucleus;GO:0016021:integral component of membrane;…	GO:0005524:ATP binding;GO:0016887:ATPase activity;GO:0005388:calcium-transporting ATPase activity;GO:0005516:calmodulin binding;GO:0046872:metal ion binding;GO:0030165:PDZ domain binding;GO:0015085:calcium ion transmembrane transporter activity;	K05850	;ko04020 Calcium signaling pathway;ko04022 cGMP-PKG signaling pathway;ko04024 cAMP signaling pathway;ko04261 Adrenergic signaling in cardiomyocytes;ko04925 Aldosterone synthesis and secretion;ko04961 Endocrine and other factor-regulated calcium reabsorption;ko04970 Salivary secretion;ko04972 Pancreatic secretion;ko04978 Mineral absorption;
ENSDARG00000023151	3098	2	0.04	10	0.26	2	0.04	19	0.52	4	0.12	51	1.29	14.3156	2.49846	1.17807	2.12081	0.0339381	0.999831	Ups	1	53374454	53388914	+	ucp1	uncoupling protein 1 [Source:ZFIN%3BAcc:ZDB-GENE-010503-1]	GO:0006839:mitochondrial transport;GO:0007568:aging;GO:0032870:cellular response to hormone stimulus;GO:0006631:fatty acid metabolic process;GO:0006629:lipid metabolic process;GO:1990542:mitochondrial transmembrane transport;GO:1902600:hydrogen ion transmembrane transport;GO:0007585:respiratory gaseous exchange;GO:0014823:response to activity;GO:0009409:response to cold;GO:0051384:response to glu…	GO:0016021:integral component of membrane;GO:0005743:mitochondrial inner membrane;GO:0005739:mitochondrion;	GO:0022857:transmembrane transporter activity;GO:0017077:oxidative phosphorylation uncoupler activity;GO:0005215:transporter activity;	K15103	-
ENSDARG00000093411	1806	0	0	2	0.09	22	0.77	0	0	0	0	0	0	3.23427	-4.9721	2.34928	-2.11644	0.0343077	0.999831	Down	9	3621968	3653271	-	gad1a	glutamate decarboxylase 1a [Source:ZFIN%3BAcc:ZDB-GENE-070912-472]	GO:0019752:carboxylic acid metabolic process;GO:0042136:neurotransmitter biosynthetic process;	-	GO:0004351:glutamate decarboxylase activity;GO:0030170:pyridoxal phosphate binding;	K01580	;ko00250 Alanine, aspartate and glutamate metabolism;ko00410 beta-Alanine metabolism;ko00430 Taurine and hypotaurine metabolism;ko00650 Butanoate metabolism;ko01100 Metabolic pathways;ko01110 Biosynthesis of secondary metabolites;ko01120 Microbial metabolism in diverse environments;ko02024 Quorum sensing;ko04727 GABAergic synapse;ko04940 Type I diabetes mellitus;
ENSDARG00000092126	4386	0	0	1	0.02	2	0.03	5	0.1	5	0.1	8	0.14	3.73911	2.96735	1.40217	2.11626	0.0343225	0.999831	Ups	22	24751101	24757785	-	vtg5	vitellogenin 5 [Source:ZFIN%3BAcc:ZDB-GENE-001201-4]	GO:0034605:cellular response to heat;GO:0032355:response to estradiol;GO:0032868:response to insulin;GO:1903165:response to polycyclic arene;	GO:0005829:cytosol;GO:0005615:extracellular space;GO:0060417:yolk;	GO:0005319:lipid transporter activity;GO:0045735:nutrient reservoir activity;GO:0005102:receptor binding;	-	-
ENSDARG00000005943	2299	88	2.46	47	1.63	37	1.01	17	0.62	14	0.56	9	0.31	31.1736	-1.599	0.756935	-2.11246	0.0346468	0.999831	Down	5	26930062	26950374	-	htra4	HtrA serine peptidase 4 [Source:ZFIN%3BAcc:ZDB-GENE-131120-192]	GO:0060718:chorionic trophoblast cell differentiation;GO:0030514:negative regulation of BMP signaling pathway;GO:0030512:negative regulation of transforming growth factor beta receptor signaling pathway;GO:0001890:placenta development;	GO:0005829:cytosol;GO:0005576:extracellular region;GO:0005886:plasma membrane;	GO:0042802:identical protein binding;GO:0005520:insulin-like growth factor binding;GO:0004252:serine-type endopeptidase activity;	K08784	-
ENSDARG00000068969	1374	145	6.77	2	0.12	66	3.02	12	0.74	577	38.66	210	11.96	196.667	2.69393	1.27619	2.11091	0.0347798	0.999831	Ups	8	22438398	22455390	+	zgc:153759	zgc:153759 [Source:ZFIN%3BAcc:ZDB-GENE-060825-148]	-	-	-	K05152	;ko04060 Cytokine-cytokine receptor interaction;ko04061 Viral protein interaction with cytokine and cytokine receptor;ko05168 Herpes simplex virus 1 infection;
ENSDARG00000042277	1959	123	4.03	5	0.2	39	1.25	1	0.04	9	0.42	9	0.36	24.2908	-2.5077	1.18819	-2.11052	0.0348136	0.999831	Down	7	20965880	21089475	+	efnb3b	ephrin-B3b [Source:ZFIN%3BAcc:ZDB-GENE-010618-3]	GO:0007628:adult walking behavior;GO:0016198:axon choice point recognition;GO:0007411:axon guidance;GO:0007267:cell-cell signaling;GO:0048013:ephrin receptor signaling pathway;GO:0050771:negative regulation of axonogenesis;GO:0007399:nervous system development;GO:0031295:T cell costimulation;	GO:0005887:integral component of plasma membrane;GO:0005886:plasma membrane;	GO:0046875:ephrin receptor binding;GO:0005005:transmembrane-ephrin receptor activity;GO:0001618:virus receptor activity;	K05463	;ko04360 Axon guidance;
ENSDARG00000098881	2179	0	0	0	0	0	0	1	0.04	5	0.21	2	0.07	1.66826	4.4161	2.09375	2.10918	0.0349293	0.999831	Ups	11	31168697	31172276	-	si:dkey-238i5.3	si:dkey-238i5.3 [Source:ZFIN%3BAcc:ZDB-GENE-141222-86]	-	-	-	-	-
ENSDARG00000097596	830	65	5.02	30	2.89	463	35.12	27	2.74	36	3.99	29	2.73	91.5791	-2.05123	0.97402	-2.10595	0.0352091	0.999831	Down	6	39184236	39187657	+	tac3b	tachykinin precursor 3b [Source:ZFIN%3BAcc:ZDB-GENE-120716-1]	-	-	-	-	-
ENSDARG00000052122	5426	8	0.09	5	0.07	5	0.06	0	0	0	0	1	0.01	2.61548	-3.61669	1.71805	-2.10512	0.0352809	0.999831	Down	25	9003230	9009902	+	rag1	recombination activating 1 [Source:NCBI gene%3BAcc:30663]	GO:0030183:B cell differentiation;GO:0010390:histone monoubiquitination;GO:0033077:T cell differentiation in thymus;GO:0033151:V(D)J recombination;	GO:0005634:nucleus;	GO:0004519:endonuclease activity;GO:0042393:histone binding;GO:0046872:metal ion binding;GO:0042803:protein homodimerization activity;GO:0043565:sequence-specific DNA binding;GO:0061630:ubiquitin protein ligase activity;GO:0004842:ubiquitin-protein transferase activity;GO:0008270:zinc ion binding;	K10628	;ko04068 FoxO signaling pathway;ko05340 Primary immunodeficiency;
ENSDARG00000113137	5726	9	0.1	7	0.1	4	0.04	2	0.03	36	0.58	37	0.51	17.2473	2.37114	1.12899	2.10024	0.0357078	0.999831	Ups	18	8339596	8346688	+	BX276107.1	kelch repeat and BTB domain-containing protein 13-like [Source:NCBI gene%3BAcc:101886608]	-	-	-	-	-
ENSDARG00000115199	1450	1	0.04	2	0.11	23	1	0	0	1	0.06	0	0	3.72154	-4.11952	1.96205	-2.0996	0.0357639	0.999831	Down	3	562333	697363	-	dicp1.3-4	diverse immunoglobulin domain-containing protein 1.3-4 [Source:ZFIN%3BAcc:ZDB-GENE-120305-3]	-	-	-	-	-
ENSDARG00000093131	3569	9	0.16	7	0.16	71	1.25	1	0.02	280	7.22	125	2.74	96.8714	2.87489	1.36988	2.09864	0.0358487	0.999831	Ups	13	15853677	15865335	-	si:ch211-57f7.7	si:ch211-57f7.7 [Source:ZFIN%3BAcc:ZDB-GENE-090313-119]	-	-	-	-	-
ENSDARG00000116187	1271	0	0	0	0	0	0	0	0	40	2.9	87	5.36	22.546	8.20071	3.90901	2.0979	0.0359139	0.999831	Ups	12	46483618	46488071	+	BX005305.5	legumain-like [Source:NCBI gene%3BAcc:100005129]	-	-	-	K01369	;ko04142 Lysosome;ko04612 Antigen processing and presentation;
ENSDARG00000117309	2686	3	0.07	16	0.48	0	0	0	0	0	0	0	0	3.09521	-4.89504	2.33363	-2.09761	0.0359398	0.999831	Down	6	24310761	24316479	+	BX927081.3	-	-	-	-	-	-
ENSDARG00000018342	2468	0	0	0	0	0	0	8	0.27	0	0	4	0.13	2.07134	4.76792	2.27504	2.09575	0.0361041	0.999831	Ups	10	41624711	41664427	-	ggt1b	gamma-glutamyltransferase 1b [Source:ZFIN%3BAcc:ZDB-GENE-110408-13]	GO:0007568:aging;GO:0034599:cellular response to oxidative stress;GO:0006536:glutamate metabolic process;GO:0006750:glutathione biosynthetic process;GO:0006751:glutathione catabolic process;GO:0031179:peptide modification;GO:0002682:regulation of immune system process;GO:0050727:regulation of inflammatory response;GO:0032355:response to estradiol;GO:0032496:response to lipopolysaccharide;GO:00346…	GO:0005615:extracellular space;GO:0005887:integral component of plasma membrane;GO:0005886:plasma membrane;	GO:0036374:glutathione hydrolase activity;GO:0000048:peptidyltransferase activity;GO:0016755:transferase activity, transferring amino-acyl groups;	K18592	;ko00430 Taurine and hypotaurine metabolism;ko00460 Cyanoamino acid metabolism;ko00480 Glutathione metabolism;ko00590 Arachidonic acid metabolism;ko01100 Metabolic pathways;
ENSDARG00000092071	1296	1	0.05	1	0.06	1	0.05	10	0.65	3	0.21	4	0.24	3.57086	2.92097	1.39387	2.09558	0.0361193	0.999831	Ups	13	9889676	9895628	-	si:ch211-117n7.6	si:ch211-117n7.6 [Source:ZFIN%3BAcc:ZDB-GENE-060503-474]	GO:0046464:acylglycerol catabolic process;GO:0007628:adult walking behavior;GO:0046475:glycerophospholipid catabolic process;GO:0052651:monoacylglycerol catabolic process;GO:0006660:phosphatidylserine catabolic process;GO:0009395:phospholipid catabolic process;GO:0002084:protein depalmitoylation;GO:0050727:regulation of inflammatory response;GO:0010996:response to auditory stimulus;	GO:0032281:alpha-amino-3-hydroxy-5-methyl-4-isoxazolepropionic acid selective glutamate receptor complex;GO:0032839:dendrite cytoplasm;GO:0005789:endoplasmic reticulum membrane;GO:0016021:integral component of membrane;GO:0005886:plasma membrane;	GO:0047372:acylglycerol lipase activity;GO:0004622:lysophospholipase activity;GO:0008474:palmitoyl-(protein) hydrolase activity;GO:0004620:phospholipase activity;	-	-
ENSDARG00000029296	8055	8	0.06	7	0.07	5	0.04	3	0.03	13	0.15	70	0.68	16.9568	2.34626	1.12005	2.09478	0.0361907	0.999831	Ups	14	11103718	11268375	+	nexmifb	neurite extension and migration factor b [Source:ZFIN%3BAcc:ZDB-GENE-140106-18]	-	-	-	-	-
ENSDARG00000056292	1594	198	7.97	2	0.1	178	7.03	9	0.48	1	0.06	34	1.67	54.3101	-2.74381	1.31062	-2.09352	0.0363028	0.999831	Down	17	21063403	21066105	-	vsx1	visual system homeobox 1 homolog%2C chx10-like [Source:NCBI gene%3BAcc:30598]	GO:0048318:axial mesoderm development;GO:0030900:forebrain development;GO:0048329:negative regulation of axial mesodermal cell fate specification;GO:0045892:negative regulation of transcription, DNA-templated;GO:0048339:paraxial mesoderm development;GO:0048348:paraxial mesodermal cell fate specification;GO:0021501:prechordal plate formation;GO:0006355:regulation of transcription, DNA-templated;GO…	GO:0005634:nucleus;	GO:0003682:chromatin binding;GO:0043565:sequence-specific DNA binding;GO:0044212:transcription regulatory region DNA binding;	K09335	-
ENSDARG00000093239	534	3	0.36	5	0.75	4	0.47	0	0	0	0	0	0	1.73858	-4.06382	1.94307	-2.09144	0.0364887	0.999831	Down	18	18744462	18749405	-	BX649641.3	-	GO:0006419:alanyl-tRNA aminoacylation;GO:0021680:cerebellar Purkinje cell layer development;GO:0043524:negative regulation of neuron apoptotic process;GO:0050905:neuromuscular process;GO:0050885:neuromuscular process controlling balance;GO:0006400:tRNA modification;	GO:0005737:cytoplasm;GO:0005829:cytosol;GO:0005739:mitochondrion;	GO:0004813:alanine-tRNA ligase activity;GO:0016597:amino acid binding;GO:0002161:aminoacyl-tRNA editing activity;GO:0005524:ATP binding;GO:0002196:Ser-tRNA(Ala) hydrolase activity;GO:0045182:translation regulator activity;GO:0000049:tRNA binding;GO:0008270:zinc ion binding;	K01872	;ko00970 Aminoacyl-tRNA biosynthesis;
ENSDARG00000094171	4937	42	0.55	10	0.16	11	0.14	2	0.03	3	0.06	5	0.08	9.98601	-2.16323	1.03617	-2.08772	0.0368232	0.999831	Down	22	14363952	14475927	-	lrp1ba	low density lipoprotein receptor-related protein 1Ba [Source:ZFIN%3BAcc:ZDB-GENE-050208-608]	GO:0015031:protein transport;GO:0006898:receptor-mediated endocytosis;	GO:0016021:integral component of membrane;GO:0043235:receptor complex;	GO:0005509:calcium ion binding;	K06233	;ko04340 Hedgehog signaling pathway;ko04918 Thyroid hormone synthesis;ko04979 Cholesterol metabolism;
ENSDARG00000093457	963	0	0	1	0.08	0	0	14	1.22	0	0	3	0.24	3.19484	4.34753	2.08629	2.08385	0.0371738	0.999831	Ups	20	51695479	51697437	-	si:ch211-14a11.2	si:ch211-14a11.2 [Source:ZFIN%3BAcc:ZDB-GENE-050420-151]	-	-	-	-	-
ENSDARG00000093366	795	0	0	1	0.1	0	0	1	0.11	4	0.46	7	0.69	2.35403	3.87044	1.85757	2.08361	0.0371958	0.999831	Ups	10	38526496	38544426	+	acer3	alkaline ceramidase 3 [Source:ZFIN%3BAcc:ZDB-GENE-091204-155]	GO:0046514:ceramide catabolic process;GO:0006954:inflammatory response;GO:0042552:myelination;GO:0071602:phytosphingosine biosynthetic process;GO:0008284:positive regulation of cell proliferation;GO:0043067:regulation of programmed cell death;GO:0030148:sphingolipid biosynthetic process;GO:0046512:sphingosine biosynthetic process;	GO:0005783:endoplasmic reticulum;GO:0005789:endoplasmic reticulum membrane;GO:0030176:integral component of endoplasmic reticulum membrane;GO:0030173:integral component of Golgi membrane;GO:0016021:integral component of membrane;	GO:0005509:calcium ion binding;GO:0071633:dihydroceramidase activity;GO:0017040:ceramidase activity;GO:0070774:phytoceramidase activity;GO:0008270:zinc ion binding;	K04711	;ko00600 Sphingolipid metabolism;ko01100 Metabolic pathways;
ENSDARG00000098036	1746	0	0	0	0	1	0.04	0	0	7	0.37	8	0.36	2.99121	4.25295	2.04139	2.08336	0.0372185	0.999831	Ups	24	10397865	10406797	+	si:ch211-69l10.4	si:ch211-69l10.4 [Source:ZFIN%3BAcc:ZDB-GENE-131127-259]	-	-	-	-	-
ENSDARG00000032553	2315	59	1.64	35	1.21	48	1.31	58	2.11	91	3.62	90	3.04	65.0542	1.23858	0.594618	2.08299	0.0372519	0.999831	Ups	17	9912036	9936915	-	egln3	egl-9 family hypoxia-inducible factor 3 [Source:ZFIN%3BAcc:ZDB-GENE-040426-2541]	GO:0006919:activation of cysteine-type endopeptidase activity involved in apoptotic process;GO:0006915:apoptotic process;GO:0006974:cellular response to DNA damage stimulus;GO:0018401:peptidyl-proline hydroxylation to 4-hydroxy-L-proline;GO:0018126:protein hydroxylation;GO:0042127:regulation of cell proliferation;GO:0043523:regulation of neuron apoptotic process;GO:0055008:cardiac muscle tissue m…	GO:0005737:cytoplasm;GO:0005829:cytosol;GO:0005634:nucleus;GO:0014069:postsynaptic density;	GO:0016706:oxidoreductase activity, acting on paired donors, with incorporation or reduction of molecular oxygen, 2-oxoglutarate as one donor, and incorporation of one atom each of oxygen into both donors;GO:0005506:iron ion binding;GO:0031418:L-ascorbic acid binding;GO:0031545:peptidyl-proline 4-dioxygenase activity;GO:0031543:peptidyl-proline dioxygenase activity;GO:0019899:enzyme binding;GO:00…	K09592	;ko04066 HIF-1 signaling pathway;ko05200 Pathways in cancer;ko05211 Renal cell carcinoma;
ENSDARG00000093382	1058	221	13.4	140	10.58	63	3.75	246	19.59	186	16.19	314	23.23	194.986	1.2212	0.587913	2.07717	0.0377857	0.999831	Ups	10	27006266	27009584	-	uqcc3	ubiquinol-cytochrome c reductase complex assembly factor 3 [Source:NCBI gene%3BAcc:558925]	GO:0006754:ATP biosynthetic process;GO:0042407:cristae formation;GO:0006122:mitochondrial electron transport, ubiquinol to cytochrome c;GO:0034551:mitochondrial respiratory chain complex III assembly;	GO:0031305:integral component of mitochondrial inner membrane;	GO:1901612:cardiolipin binding;GO:0070300:phosphatidic acid binding;	-	-
ENSDARG00000054340	1350	5	0.24	39	2.31	6	0.28	2	0.12	1	0.07	4	0.23	9.26351	-2.69772	1.30298	-2.07043	0.0384121	0.999831	Down	19	34913855	34927201	-	sla1a	Src like adaptor 1a [Source:ZFIN%3BAcc:ZDB-GENE-050904-3]	GO:0030154:cell differentiation;GO:0038083:peptidyl-tyrosine autophosphorylation;GO:0042127:regulation of cell proliferation;	GO:0005768:endosome;	GO:0004715:non-membrane spanning protein tyrosine kinase activity;GO:0005070:SH3/SH2 adaptor activity;	-	-
ENSDARG00000031126	2246	18	0.51	7	0.25	8	0.22	2	0.08	0	0	2	0.07	5.06027	-2.64346	1.27691	-2.0702	0.0384341	0.999831	Down	3	57948377	57979190	+	notum1a	notum%2C palmitoleoyl-protein carboxylesterase a [Source:NCBI gene%3BAcc:570510]	GO:0009952:anterior/posterior pattern specification;GO:0006507:GPI anchor release;GO:0090090:negative regulation of canonical Wnt signaling pathway;GO:0030178:negative regulation of Wnt signaling pathway;GO:0021532:neural tube patterning;GO:1990697:protein depalmitoleylation;GO:0016055:Wnt signaling pathway;	GO:0005576:extracellular region;	GO:1990699:palmitoleyl hydrolase activity;	-	-
ENSDARG00000028912	3077	0	0	0	0	0	0	0	0	10	0.3	1	0.03	2.51813	5.01679	2.42508	2.06871	0.0385729	0.999831	Ups	7	5699624	5711197	-	si:dkey-10h3.2	si:dkey-10h3.2 [Source:ZFIN%3BAcc:ZDB-GENE-060503-142]	-	-	-	K06727	-
ENSDARG00000114309	10403	213	1.31	38	0.29	14	0.08	117	0.95	719	6.36	18	0.14	228.152	2.52664	1.22369	2.06477	0.0389452	0.999831	Ups	3	4047789	4059144	+	BX005421.3	-	-	-	-	-	-
ENSDARG00000092639	487	189	24.9	2	0.33	138	17.84	23	3.98	2	0.38	0	0	45.6806	-3.12466	1.51406	-2.06376	0.03904	0.999831	Down	18	18720679	18727032	-	BX649641.1	-	GO:0006419:alanyl-tRNA aminoacylation;GO:0021680:cerebellar Purkinje cell layer development;GO:0043524:negative regulation of neuron apoptotic process;GO:0050905:neuromuscular process;GO:0050885:neuromuscular process controlling balance;GO:0006400:tRNA modification;	GO:0005737:cytoplasm;GO:0005829:cytosol;GO:0005739:mitochondrion;	GO:0004813:alanine-tRNA ligase activity;GO:0016597:amino acid binding;GO:0002161:aminoacyl-tRNA editing activity;GO:0005524:ATP binding;GO:0002196:Ser-tRNA(Ala) hydrolase activity;GO:0045182:translation regulator activity;GO:0000049:tRNA binding;GO:0008270:zinc ion binding;	K01872	;ko00970 Aminoacyl-tRNA biosynthesis;
ENSDARG00000057032	2345	7	0.19	13	0.44	3	0.08	2	0.07	25	0.98	86	2.87	22.6638	2.49456	1.20997	2.06167	0.0392388	0.999831	Ups	21	21367914	21373242	-	ppm1nb	protein phosphatase%2C Mg2+/Mn2+ dependent%2C 1Nb (putative) [Source:ZFIN%3BAcc:ZDB-GENE-071004-34]	GO:0006499:N-terminal protein myristoylation;GO:0050687:negative regulation of defense response to virus;GO:0043124:negative regulation of I-kappaB kinase/NF-kappaB signaling;GO:0032688:negative regulation of interferon-beta production;GO:1901223:negative regulation of NIK/NF-kappaB signaling;GO:0006470:protein dephosphorylation;	GO:0005829:cytosol;GO:0016020:membrane;GO:0005634:nucleus;	GO:0000287:magnesium ion binding;GO:0004724:magnesium-dependent protein serine/threonine phosphatase activity;GO:0030145:manganese ion binding;GO:0004722:protein serine/threonine phosphatase activity;	K04457	;ko04010 MAPK signaling pathway;
ENSDARG00000095801	587	83	9.07	272	37.06	55	5.9	24	3.44	25	3.92	56	7.47	82.4037	-1.75928	0.853995	-2.06006	0.0393932	0.999831	Down	22	11090338	11091099	-	BX649485.2	-	-	-	-	-	-
ENSDARG00000095745	967	10	0.66	1	0.08	11	0.72	38	3.31	9	0.86	20	1.62	14.9277	2.09066	1.01565	2.05845	0.0395473	0.999831	Ups	22	1285182	1290139	+	si:ch73-138e16.3	si:ch73-138e16.3 [Source:ZFIN%3BAcc:ZDB-GENE-070705-202]	-	GO:0005634:nucleus;	GO:0003677:DNA binding;GO:0000981:sequence-specific DNA binding RNA polymerase II transcription factor activity;GO:0046872:metal ion binding;	K09228	;ko05168 Herpes simplex virus 1 infection;
ENSDARG00000057410	1381	7	0.33	9	0.52	2	0.09	0	0	0	0	1	0.06	2.78661	-3.70154	1.79871	-2.05789	0.0396009	0.999831	Down	21	19487707	19489087	-	rxfp3	relaxin family peptide receptor 3 [Source:ZFIN%3BAcc:ZDB-GENE-080723-67]	GO:0007218:neuropeptide signaling pathway;GO:0032467:positive regulation of cytokinesis;GO:0051482:positive regulation of cytosolic calcium ion concentration involved in phospholipase C-activating G-protein coupled signaling pathway;	GO:0016021:integral component of membrane;GO:0005887:integral component of plasma membrane;	GO:0008528:G-protein coupled peptide receptor activity;GO:0004966:galanin receptor activity;	K08397	;ko04080 Neuroactive ligand-receptor interaction;ko04926 Relaxin signaling pathway;
ENSDARG00000091574	3603	150	2.67	879	19.51	23	0.4	6	0.14	92	2.35	44	0.96	200.803	-2.54056	1.23458	-2.05783	0.0396066	0.999831	Down	11	3345405	3366782	-	suox	sulfite oxidase [Source:ZFIN%3BAcc:ZDB-GENE-070718-3]	GO:0042128:nitrate assimilation;GO:0006790:sulfur compound metabolic process;	GO:0005758:mitochondrial intermembrane space;GO:0005739:mitochondrion;	GO:0020037:heme binding;GO:0030151:molybdenum ion binding;GO:0043546:molybdopterin cofactor binding;GO:0008482:sulfite oxidase activity;	K00387	;ko00920 Sulfur metabolism;ko01100 Metabolic pathways;ko01120 Microbial metabolism in diverse environments;
ENSDARG00000117736	777	0	0	0	0	0	0	0	0	16	1.9	0	0	3.78855	5.61554	2.73154	2.05581	0.0398007	0.999831	Ups	4	74028579	74032250	-	LO018205.3	-	-	-	-	-	-
ENSDARG00000004561	1964	8	0.26	3	0.12	2	0.06	0	0	0	0	0	0	1.72857	-4.0715	1.98114	-2.05513	0.0398666	0.999831	Down	16	13020776	13109749	-	prkcg	protein kinase C%2C gamma [Source:ZFIN%3BAcc:ZDB-GENE-090206-1]	GO:0035556:intracellular signal transduction;GO:0043524:negative regulation of neuron apoptotic process;GO:1901799:negative regulation of proteasomal protein catabolic process;GO:0031397:negative regulation of protein ubiquitination;GO:0006468:protein phosphorylation;GO:0042752:regulation of circadian rhythm;GO:0032095:regulation of response to food;GO:0043278:response to morphine;GO:0048265:resp…	GO:0030054:cell junction;GO:0005737:cytoplasm;GO:0005829:cytosol;GO:0030425:dendrite;GO:0005634:nucleus;GO:0048471:perinuclear region of cytoplasm;GO:0005886:plasma membrane;GO:0045202:synapse;	GO:0005524:ATP binding;GO:0004697:protein kinase C activity;GO:0004674:protein serine/threonine kinase activity;GO:0008270:zinc ion binding;	K19663	;ko01521 EGFR tyrosine kinase inhibitor resistance;ko04010 MAPK signaling pathway;ko04012 ErbB signaling pathway;ko04014 Ras signaling pathway;ko04015 Rap1 signaling pathway;ko04020 Calcium signaling pathway;ko04066 HIF-1 signaling pathway;ko04070 Phosphatidylinositol signaling system;ko04071 Sphingolipid signaling pathway;ko04150 mTOR signaling pathway;ko04270 Vascular smooth muscle contraction;…
ENSDARG00000057536	641	5	0.5	5	0.62	2	0.2	0	0	0	0	0	0	1.71373	-4.04539	1.97023	-2.05326	0.0400472	0.999831	Down	9	22075528	22076368	-	crygm2a	crystallin%2C gamma M2a [Source:ZFIN%3BAcc:ZDB-GENE-050516-9]	-	-	GO:0005212:structural constituent of eye lens;	-	-
ENSDARG00000003403	9037	168	1.19	1023	9.05	209	1.46	151	1.41	30	0.31	177	1.53	283.993	-1.85402	0.904021	-2.05086	0.0402803	0.999831	Down	5	21295747	21524251	-	tenm1	teneurin transmembrane protein 1 [Source:ZFIN%3BAcc:ZDB-GENE-060531-26]	GO:0007157:heterophilic cell-cell adhesion via plasma membrane cell adhesion molecules;GO:0048666:neuron development;GO:0007218:neuropeptide signaling pathway;GO:0030838:positive regulation of actin filament polymerization;GO:0051491:positive regulation of filopodium assembly;GO:0090316:positive regulation of intracellular protein transport;GO:0043406:positive regulation of MAP kinase activity;GO…	GO:0005737:cytoplasm;GO:0005856:cytoskeleton;GO:0005783:endoplasmic reticulum;GO:0005794:Golgi apparatus;GO:0005887:integral component of plasma membrane;GO:0043005:neuron projection;GO:0016363:nuclear matrix;GO:0016607:nuclear speck;GO:0005634:nucleus;GO:0048471:perinuclear region of cytoplasm;GO:0005886:plasma membrane;GO:0005576:extracellular region;	GO:0050839:cell adhesion molecule binding;GO:0046982:protein heterodimerization activity;GO:0042803:protein homodimerization activity;GO:0008201:heparin binding;	-	-
ENSDARG00000093108	1093	1	0.06	4	0.29	1	0.06	2	0.15	22	1.85	6	0.43	7.41352	2.83061	1.38082	2.04995	0.0403695	0.999831	Ups	24	10417365	10509462	+	CT573344.1	-	-	-	-	-	-
ENSDARG00000070743	1972	10	0.33	27	1.09	6	0.19	115	4.91	9	0.42	42	1.67	36.1768	2.17878	1.06292	2.04981	0.0403829	0.999831	Ups	6	36821621	36837536	+	tmem45a	transmembrane protein 45a [Source:ZFIN%3BAcc:ZDB-GENE-050522-34]	-	-	-	-	-
ENSDARG00000019772	2617	3	0.07	3	0.09	6	0.14	0	0	0	0	0	0	1.65922	-4.00628	1.95524	-2.04899	0.0404627	0.999831	Down	15	478524	496549	+	si:ch1073-280e3.1	si:ch1073-280e3.1 [Source:ZFIN%3BAcc:ZDB-GENE-110411-261]	-	-	-	K01332	;ko04610 Complement and coagulation cascades;ko05133 Pertussis;ko05150 Staphylococcus aureus infection;ko05171 Coronavirus disease - COVID-19;ko05322 Systemic lupus erythematosus;
ENSDARG00000104756	2361	7	0.19	0	0	100	2.67	3	0.11	0	0	4	0.13	15.1312	-3.56662	1.74095	-2.04867	0.0404944	0.999831	Down	12	48979060	48992527	-	-	cadherin-related family member 1-like [Source:NCBI gene%3BAcc:108191765]	GO:0007155:cell adhesion;GO:0007156:homophilic cell adhesion via plasma membrane adhesion molecules;	GO:0005887:integral component of plasma membrane;	GO:0005509:calcium ion binding;	K16501	-
ENSDARG00000031876	1638	0	0	0	0	37	1.42	0	0	0	0	0	0	4.86383	-5.56047	2.71754	-2.04614	0.0407427	0.999831	Down	16	25388503	25393699	-	pard6ga	par-6 family cell polarity regulator gamma a [Source:ZFIN%3BAcc:ZDB-GENE-050923-1]	GO:0007409:axonogenesis;GO:0070830:bicellular tight junction assembly;GO:0051301:cell division;GO:0007043:cell-cell junction assembly;GO:0007098:centrosome cycle;GO:0007163:establishment or maintenance of cell polarity;GO:0065003:macromolecular complex assembly;GO:0030334:regulation of cell migration;GO:0060341:regulation of cellular localization;	GO:0016324:apical plasma membrane;GO:0005923:bicellular tight junction;GO:0005938:cell cortex;GO:0005829:cytosol;GO:0070062:extracellular exosome;GO:0005634:nucleus;GO:0005886:plasma membrane;GO:0032991:macromolecular complex;	GO:0005080:protein kinase C binding;GO:0017048:Rho GTPase binding;	K06093	;ko04015 Rap1 signaling pathway;ko04144 Endocytosis;ko04360 Axon guidance;ko04390 Hippo signaling pathway;ko04391 Hippo signaling pathway - fly;ko04530 Tight junction;ko05165 Human papillomavirus infection;
ENSDARG00000011166	1919	15	0.5	107	4.46	6	0.2	41	1.8	267	12.81	217	8.85	124.253	2.31204	1.13034	2.04543	0.0408123	0.999831	Ups	2	29477383	29485408	-	cahz	carbonic anhydrase [Source:NCBI gene%3BAcc:30331]	GO:0015670:carbon dioxide transport;GO:0042539:hypotonic salinity response;	-	GO:0004089:carbonate dehydratase activity;GO:0008270:zinc ion binding;	K18245	;ko00910 Nitrogen metabolism;ko01100 Metabolic pathways;ko04964 Proximal tubule bicarbonate reclamation;ko04966 Collecting duct acid secretion;ko04971 Gastric acid secretion;ko04972 Pancreatic secretion;ko04976 Bile secretion;
ENSDARG00000075352	4701	6	0.08	4	0.07	7	0.09	0	0	1	0.02	0	0	2.55569	-3.52997	1.72591	-2.04528	0.0408276	0.999831	Down	2	6734108	6807174	+	brinp3b	bone morphogenetic protein/retinoic acid inducible neural-specific 3b [Source:ZFIN%3BAcc:ZDB-GENE-121022-1]	GO:0007050:cell cycle arrest;GO:0071300:cellular response to retinoic acid;GO:0045786:negative regulation of cell cycle;GO:0045930:negative regulation of mitotic cell cycle;GO:0045666:positive regulation of neuron differentiation;	GO:0030425:dendrite;GO:0005783:endoplasmic reticulum;GO:0005576:extracellular region;GO:0005739:mitochondrion;GO:0043025:neuronal cell body;	-	K12473	;ko04144 Endocytosis;ko04913 Ovarian steroidogenesis;ko04925 Aldosterone synthesis and secretion;ko04927 Cortisol synthesis and secretion;ko04934 Cushing syndrome;ko04976 Bile secretion;ko04979 Cholesterol metabolism;ko05145 Toxoplasmosis;ko05160 Hepatitis C;
ENSDARG00000103231	6120	88	0.92	176	2.3	144	1.48	45	0.62	266	4	917	11.73	268.588	1.814	0.88696	2.04519	0.040836	0.999831	Ups	20	40237441	40253682	+	si:ch211-199i15.5	si:ch211-199i15.5 [Source:ZFIN%3BAcc:ZDB-GENE-130603-58]	-	-	-	-	-
ENSDARG00000060264	7622	3	0.03	10	0.1	4	0.03	0	0	1	0.01	0	0	2.83102	-3.67186	1.80031	-2.03958	0.0413925	0.999831	Down	1	41886830	41924484	+	si:dkey-37g12.1	si:dkey-37g12.1 [Source:ZFIN%3BAcc:ZDB-GENE-090312-145]	GO:0007166:cell surface receptor signaling pathway;GO:0006182:cGMP biosynthetic process;GO:0019934:cGMP-mediated signaling;GO:0042417:dopamine metabolic process;GO:0035556:intracellular signal transduction;GO:0048662:negative regulation of smooth muscle cell proliferation;GO:0010753:positive regulation of cGMP-mediated signaling;GO:0007168:receptor guanylyl cyclase signaling pathway;GO:0050880:re…	GO:0016021:integral component of membrane;GO:0005886:plasma membrane;GO:0043235:receptor complex;	GO:0005524:ATP binding;GO:0005525:GTP binding;GO:0004383:guanylate cyclase activity;GO:0016941:natriuretic peptide receptor activity;GO:0017046:peptide hormone binding;GO:0001653:peptide receptor activity;GO:0004672:protein kinase activity;GO:0019901:protein kinase binding;	K12321	;ko00230 Purine metabolism;ko01100 Metabolic pathways;ko04740 Olfactory transduction;ko04744 Phototransduction;
ENSDARG00000099337	612	0	0	1	0.13	0	0	0	0	14	2.11	1	0.13	3.6364	4.51647	2.21624	2.0379	0.0415604	0.999831	Ups	4	69150355	69151573	+	si:ch211-209j12.2	si:ch211-209j12.2 [Source:ZFIN%3BAcc:ZDB-GENE-120709-33]	-	-	-	-	-
ENSDARG00000053961	4296	2	0.03	4	0.07	1	0.01	3	0.06	21	0.45	6	0.11	7.47955	2.63054	1.29108	2.03747	0.0416027	0.999831	Ups	6	40975655	40992683	-	slc2a11a	solute carrier family 2 member 11a [Source:ZFIN%3BAcc:ZDB-GENE-080723-20]	GO:0008645:hexose transport;	GO:0030054:cell junction;GO:0016021:integral component of membrane;GO:0005634:nucleus;GO:0005886:plasma membrane;	GO:0022857:transmembrane transporter activity;	K08148	-
ENSDARG00000089192	1428	1	0.04	0	0	23	1.01	0	0	0	0	0	0	3.14249	-4.93239	2.42393	-2.03487	0.0418637	0.999831	Down	17	49529197	49543048	-	zmp:0000001267	zmp:0000001267 [Source:ZFIN%3BAcc:ZDB-GENE-140106-227]	-	-	-	-	-
ENSDARG00000038786	2520	10	0.25	1	0.03	2	0.05	3	0.1	23	0.84	21	0.65	10.7777	2.45661	1.21044	2.02952	0.0424056	0.999831	Ups	2	32515846	32558795	-	smarcd3a	SWI/SNF related%2C matrix associated%2C actin dependent regulator of chromatin%2C subfamily d%2C member 3a [Source:ZFIN%3BAcc:ZDB-GENE-070912-491]	GO:0003219:cardiac right ventricle formation;GO:0006338:chromatin remodeling;GO:0003007:heart morphogenesis;GO:0042692:muscle cell differentiation;GO:0003407:neural retina development;GO:0006337:nucleosome disassembly;GO:0010971:positive regulation of G2/M transition of mitotic cell cycle;GO:0002052:positive regulation of neuroblast proliferation;GO:0051152:positive regulation of smooth muscle ce…	GO:0005737:cytoplasm;GO:0071565:nBAF complex;GO:0071564:npBAF complex;GO:0000790:nuclear chromatin;GO:0005654:nucleoplasm;GO:0005634:nucleus;GO:0016514:SWI/SNF complex;	GO:0003682:chromatin binding;GO:0035257:nuclear hormone receptor binding;GO:0016922:ligand-dependent nuclear receptor binding;GO:0030374:ligand-dependent nuclear receptor transcription coactivator activity;GO:0005102:receptor binding;GO:0008134:transcription factor binding;GO:0003713:transcription coactivator activity;	K11650	;ko04714 Thermogenesis;ko05225 Hepatocellular carcinoma;
ENSDARG00000099382	2170	186	5.5	418	15.41	51	1.48	23	0.89	4	0.17	112	4.04	122.383	-2.18172	1.07566	-2.02826	0.0425341	0.999831	Down	4	38547203	38564071	+	si:ch211-209n20.1	si:ch211-209n20.1 [Source:ZFIN%3BAcc:ZDB-GENE-070705-98]	GO:0071346:cellular response to interferon-gamma;GO:0042742:defense response to bacterium;GO:0006955:immune response;	-	GO:0005525:GTP binding;GO:0003924:GTPase activity;	-	-
ENSDARG00000077697	3750	36	0.62	13	0.28	76	1.28	9	0.2	283	6.95	77	1.61	96.7363	2.2778	1.12384	2.02681	0.0426823	0.999831	Ups	4	59245846	59284100	+	si:dkey-105i14.1	si:dkey-105i14.1 [Source:ZFIN%3BAcc:ZDB-GENE-081103-64]	-	-	-	K12800	;ko04217 Necroptosis;ko04621 NOD-like receptor signaling pathway;ko04625 C-type lectin receptor signaling pathway;ko05130 Pathogenic Escherichia coli infection;ko05131 Shigellosis;ko05132 Salmonella infection;ko05133 Pertussis;ko05135 Yersinia infection;ko05164 Influenza A;ko05171 Coronavirus disease - COVID-19;
ENSDARG00000092574	685	8	0.75	0	0	11	1.01	0	0	0	0	0	0	2.39826	-4.54767	2.24715	-2.02375	0.0429959	0.999831	Down	8	38593904	38616712	-	si:ch211-198d23.1	si:ch211-198d23.1 [Source:ZFIN%3BAcc:ZDB-GENE-081104-163]	-	-	-	-	-
ENSDARG00000111125	2073	4	0.12	10	0.39	5	0.15	0	0	77	3.42	22	0.83	24.3834	2.92828	1.44908	2.02078	0.0433025	0.999831	Ups	3	832788	836135	+	FP102888.3	GTPase IMAP family member 4-like [Source:NCBI gene%3BAcc:101882750]	-	-	-	-	-
ENSDARG00000111026	1587	0	0	0	0	1	0.04	2	0.11	5	0.29	3	0.15	2.13378	3.72226	1.842	2.02077	0.0433038	0.999831	Ups	4	46524666	46648979	-	BX927193.2	-	GO:0007010:cytoskeleton organization;GO:0022604:regulation of cell morphogenesis;GO:0006355:regulation of transcription, DNA-templated;	GO:0005634:nucleus;	GO:0003677:DNA binding;GO:0003700:sequence-specific DNA binding transcription factor activity;GO:0000981:sequence-specific DNA binding RNA polymerase II transcription factor activity;GO:0046872:metal ion binding;	K09228	;ko05168 Herpes simplex virus 1 infection;
ENSDARG00000076104	6393	117	1.17	178	2.23	62	0.61	375	4.94	199	2.87	154	1.89	191.718	1.40746	0.69675	2.02004	0.0433794	0.999831	Ups	7	30240791	30267169	+	sema4bb	sema domain%2C immunoglobulin domain (Ig)%2C transmembrane domain (TM) and short cytoplasmic domain%2C (semaphorin) 4Bb [Source:ZFIN%3BAcc:ZDB-GENE-120503-1]	GO:0050919:negative chemotaxis;GO:0048843:negative regulation of axon extension involved in axon guidance;GO:0001755:neural crest cell migration;GO:0030335:positive regulation of cell migration;GO:0071526:semaphorin-plexin signaling pathway;	GO:0005615:extracellular space;GO:0005887:integral component of plasma membrane;GO:0005886:plasma membrane;	GO:0045499:chemorepellent activity;GO:0038191:neuropilin binding;GO:0030215:semaphorin receptor binding;	-	-
ENSDARG00000007769	1980	68	2.2	26	1.05	44	1.4	3	0.13	13	0.6	13	0.51	23.9109	-1.73177	0.857319	-2.01999	0.0433848	0.999831	Down	7	56602521	56606752	-	sult5a1	sulfotransferase family 5A%2C member 1 [Source:ZFIN%3BAcc:ZDB-GENE-060929-978]	-	-	-	K01015	;ko00140 Steroid hormone biosynthesis;
ENSDARG00000022525	4741	0	0	1	0.02	1	0.01	2	0.04	4	0.08	9	0.15	2.96983	3.22841	1.60149	2.01588	0.0438127	0.999831	Ups	3	25503442	25512817	+	mchr1b	melanin-concentrating hormone receptor 1b [Source:ZFIN%3BAcc:ZDB-GENE-030502-5]	GO:0007166:cell surface receptor signaling pathway;GO:0007218:neuropeptide signaling pathway;GO:0051928:positive regulation of calcium ion transport;GO:0007204:positive regulation of cytosolic calcium ion concentration;	GO:0060170:ciliary membrane;GO:0005887:integral component of plasma membrane;GO:0005886:plasma membrane;	GO:0004930:G-protein coupled receptor activity;GO:0042562:hormone binding;GO:0030273:melanin-concentrating hormone receptor activity;GO:0042277:peptide binding;GO:0008022:protein C-terminus binding;GO:0005102:receptor binding;	K04320	;ko04080 Neuroactive ligand-receptor interaction;
ENSDARG00000024537	3882	5	0.08	22	0.45	17	0.28	0	0	2	0.05	4	0.08	7.6695	-2.60059	1.29103	-2.01435	0.043973	0.999831	Down	20	34845672	34865031	+	emilin1a	elastin microfibril interfacer 1a [Source:ZFIN%3BAcc:ZDB-GENE-041001-191]	GO:0003180:aortic valve morphogenesis;GO:0016477:cell migration;GO:0007160:cell-matrix adhesion;GO:0048251:elastic fiber assembly;GO:0030198:extracellular matrix organization;GO:0016525:negative regulation of angiogenesis;GO:0050866:negative regulation of cell activation;GO:0032966:negative regulation of collagen biosynthetic process;GO:1904027:negative regulation of collagen fibril organization;…	GO:0005581:collagen trimer;GO:0031012:extracellular matrix;GO:0005576:extracellular region;GO:0005615:extracellular space;GO:0034668:integrin alpha4-beta1 complex;	GO:0030023:extracellular matrix constituent conferring elasticity;GO:0042802:identical protein binding;GO:0098640:integrin binding involved in cell-matrix adhesion;	-	-
ENSDARG00000091887	2536	0	0	0	0	1	0.02	0	0	20	0.73	0	0	4.86714	4.97532	2.46995	2.01434	0.043974	0.999831	Ups	2	8490588	8494716	-	BX005355.1	uncharacterized LOC101885541 [Source:NCBI gene%3BAcc:101885541]	-	-	-	-	-
ENSDARG00000100227	5185	390	4.83	269	4.15	383	4.65	155	2.52	35	0.62	168	2.54	204.825	-1.19977	0.595661	-2.01419	0.0439895	0.999831	Down	15	7299756	7337537	-	SLC7A1	solute carrier family 7 member 1b [Source:NCBI gene%3BAcc:406380]	GO:0006865:amino acid transport;GO:0097638:L-arginine import across plasma membrane;GO:1903352:L-ornithine transmembrane transport;	GO:0005887:integral component of plasma membrane;GO:0016020:membrane;GO:0005886:plasma membrane;GO:0032991:macromolecular complex;	GO:0015171:amino acid transmembrane transporter activity;GO:0015181:arginine transmembrane transporter activity;GO:0015189:L-lysine transmembrane transporter activity;GO:0000064:L-ornithine transmembrane transporter activity;	K13863	;ko05206 MicroRNAs in cancer;
ENSDARG00000096789	892	59	4.24	1	0.09	36	2.54	5	0.47	0	0	5	0.44	13.5967	-2.8067	1.39493	-2.01207	0.0442122	0.999831	Down	20	34133914	34147596	-	BX248238.2	-	-	-	-	-	-
ENSDARG00000038729	1113	8	0.46	53	3.81	2	0.11	0	0	2	0.17	5	0.35	11.5102	-3.04896	1.51721	-2.00958	0.0444759	0.999831	Down	21	7863243	7882905	-	s100z	S100 calcium binding protein Z [Source:ZFIN%3BAcc:ZDB-GENE-050522-69]	-	-	GO:0005509:calcium ion binding;GO:0042803:protein homodimerization activity;	-	-
ENSDARG00000040490	1056	22	1.34	3	0.23	10	0.6	2	0.16	1	0.09	1	0.07	5.20128	-2.58751	1.28935	-2.00683	0.0447683	0.999831	Down	9	44713033	44718628	-	dusp19a	dual specificity phosphatase 19a [Source:ZFIN%3BAcc:ZDB-GENE-081104-382]	GO:0000188:inactivation of MAPK activity;GO:0007254:JNK cascade;GO:0046329:negative regulation of JNK cascade;GO:0043508:negative regulation of JUN kinase activity;GO:0006469:negative regulation of protein kinase activity;GO:0046330:positive regulation of JNK cascade;GO:0043507:positive regulation of JUN kinase activity;GO:0043410:positive regulation of MAPK cascade;GO:0045860:positive regulation…	GO:0005737:cytoplasm;	GO:0008579:JUN kinase phosphatase activity;GO:0005078:MAP-kinase scaffold activity;GO:0031434:mitogen-activated protein kinase kinase binding;GO:0031435:mitogen-activated protein kinase kinase kinase binding;GO:0030295:protein kinase activator activity;GO:0004860:protein kinase inhibitor activity;GO:0004725:protein tyrosine phosphatase activity;GO:0008138:protein tyrosine/serine/threonine phospha…	K14165	-
ENSDARG00000070991	3340	262	5.03	271	6.49	122	2.3	76	1.92	48	1.32	103	2.41	134.413	-1.19454	0.595347	-2.00647	0.0448064	0.999831	Down	6	15604759	15641686	-	mlpha	melanophilin a [Source:ZFIN%3BAcc:ZDB-GENE-050208-724]	-	-	-	-	-
ENSDARG00000100506	4952	5	0.06	0	0	9	0.11	55	0.94	1	0.02	18	0.28	14.8278	2.85868	1.42649	2.00399	0.0450712	0.999831	Ups	22	23493170	23545828	-	crb1	crumbs cell polarity complex component 1 [Source:ZFIN%3BAcc:ZDB-GENE-050208-382]	-	-	-	K16681	;ko04390 Hippo signaling pathway;ko04391 Hippo signaling pathway - fly;
ENSDARG00000078220	335	13	2.49	4	0.95	23	4.32	3	0.75	0	0	2	0.47	6.10731	-2.57714	1.2861	-2.00385	0.0450863	0.999831	Down	16	13559511	13564275	-	BX323458.1	-	-	-	-	-	-
ENSDARG00000074085	432	0	0	27	5	0	0	0	0	0	0	0	0	4.62057	-5.47819	2.74665	-1.9945	0.0460976	0.999831	Down	22	6788761	6801876	-	si:ch1073-188e1.1	si:ch1073-188e1.1 [Source:ZFIN%3BAcc:ZDB-GENE-070705-5]	-	-	-	-	-
ENSDARG00000015236	2427	454	12	9	0.3	232	6.02	55	1.91	24	0.91	37	1.19	107.429	-2.01218	1.00927	-1.99369	0.0461863	0.999831	Down	20	52529044	52544761	+	pycr3	pyrroline-5-carboxylate reductase 3 [Source:NCBI gene%3BAcc:560682]	GO:0055129:L-proline biosynthetic process;	GO:0005829:cytosol;	GO:0004735:pyrroline-5-carboxylate reductase activity;	K00286	;ko00330 Arginine and proline metabolism;ko01100 Metabolic pathways;ko01110 Biosynthesis of secondary metabolites;ko01230 Biosynthesis of amino acids;
ENSDARG00000104755	481	0	0	0	0	0	0	3	0.53	2	0.38	2	0.33	1.32546	4.10531	2.06254	1.99041	0.0465453	0.999831	Ups	11	25212540	25226926	+	CR555298.1	-	-	-	-	-	-
ENSDARG00000074538	966	653	43.37	0	0	475	30.96	77	6.71	2	0.19	17	1.38	157.348	-3.02724	1.52179	-1.98927	0.0466716	0.999831	Down	22	24990337	24992532	-	si:dkey-179j5.5	si:dkey-179j5.5 [Source:ZFIN%3BAcc:ZDB-GENE-070705-320]	-	-	-	-	-
ENSDARG00000094316	1120	5	0.29	4	0.29	4	0.22	14	1.05	5	0.41	19	1.33	8.41768	1.89129	0.950917	1.98891	0.0467111	0.999831	Ups	23	43300892	43307237	-	si:rp71-80o10.4	si:rp71-80o10.4 [Source:ZFIN%3BAcc:ZDB-GENE-090313-413]	-	-	-	-	-
ENSDARG00000009550	1865	3	0.1	11	0.47	0	0	1	0.05	57	2.81	29	1.22	20.2783	3.0309	1.52454	1.98808	0.0468033	0.999831	Ups	14	34514336	34516587	+	foxi3b	forkhead box I3b [Source:ZFIN%3BAcc:ZDB-GENE-031126-4]	GO:0009653:anatomical structure morphogenesis;GO:0030154:cell differentiation;GO:0009792:embryo development ending in birth or egg hatching;GO:0042472:inner ear morphogenesis;GO:0045944:positive regulation of transcription from RNA polymerase II promoter;GO:0006357:regulation of transcription from RNA polymerase II promoter;	GO:0043231:intracellular membrane-bounded organelle;GO:0005730:nucleolus;GO:0005634:nucleus;	GO:0008301:DNA binding, bending;GO:0001228:RNA polymerase II transcription regulatory region sequence-specific DNA binding transcription factor activity involved in positive regulation of transcription;GO:0003700:sequence-specific DNA binding transcription factor activity;GO:0000981:sequence-specific DNA binding RNA polymerase II transcription factor activity;GO:0000978:RNA polymerase II core pro…	K09401	-
ENSDARG00000087509	835	8	0.61	1	0.1	21	1.58	0	0	0	0	2	0.19	4.18451	-3.52932	1.7759	-1.98734	0.0468847	0.999831	Down	16	21827332	21829594	-	si:ch73-322b17.4	si:ch73-322b17.4 [Source:ZFIN%3BAcc:ZDB-GENE-131121-87]	-	-	-	-	-
ENSDARG00000115898	147	1	0.44	0	0	0	0	0	0	13	8.14	1	0.53	3.34751	4.41319	2.22228	1.98588	0.0470461	0.999831	Ups	24	12970119	13002993	-	CR405710.2	-	-	-	-	-	-
ENSDARG00000095126	1739	15	0.55	6	0.28	8	0.29	5	0.24	49	2.59	25	1.13	20.1423	2.06049	1.03796	1.98514	0.0471292	0.999831	Ups	4	60934218	60938397	+	si:dkey-82i20.2	si:dkey-82i20.2 [Source:ZFIN%3BAcc:ZDB-GENE-110914-74]	GO:0007281:germ cell development;GO:0007275:multicellular organismal development;GO:0006355:regulation of transcription, DNA-templated;GO:0007283:spermatogenesis;	GO:0005634:nucleus;	GO:0003677:DNA binding;GO:0008270:zinc ion binding;	K09228	;ko05168 Herpes simplex virus 1 infection;
ENSDARG00000075058	2874	165	3.68	1	0.03	91	1.99	16	0.47	0	0	9	0.25	36.0668	-2.87874	1.45088	-1.98414	0.0472404	0.999831	Down	14	22152060	22168786	+	gabra6a	gamma-aminobutyric acid (GABA) A receptor%2C alpha 6a [Source:ZFIN%3BAcc:ZDB-GENE-040426-1692]	GO:0007268:synaptic transmission;GO:1902476:chloride transmembrane transport;GO:0007214:gamma-aminobutyric acid signaling pathway;GO:0034220:ion transmembrane transport;GO:0050877:neurological system process;GO:0042391:regulation of membrane potential;GO:0060078:regulation of postsynaptic membrane potential;GO:0007165:signal transduction;GO:0051932:synaptic transmission, GABAergic;	GO:0030054:cell junction;GO:0034707:chloride channel complex;GO:0032590:dendrite membrane;GO:1902711:GABA-A receptor complex;GO:0005887:integral component of plasma membrane;GO:0043005:neuron projection;GO:0098794:postsynapse;GO:0045211:postsynaptic membrane;GO:0045202:synapse;	GO:0005254:chloride channel activity;GO:0004890:GABA-A receptor activity;GO:0022851:GABA-gated chloride ion channel activity;GO:0005237:inhibitory extracellular ligand-gated ion channel activity;	K05175	;ko04080 Neuroactive ligand-receptor interaction;ko04723 Retrograde endocannabinoid signaling;ko04727 GABAergic synapse;ko04742 Taste transduction;ko05032 Morphine addiction;ko05033 Nicotine addiction;
ENSDARG00000024894	2167	2	0.06	0	0	3	0.09	17	0.66	0	0	17	0.61	6.31143	3.13565	1.58242	1.98156	0.0475287	0.999831	Ups	5	72264192	72289648	-	tbx5a	T-box transcription factor 5a [Source:NCBI gene%3BAcc:30071]	GO:0009887:organ morphogenesis;GO:0003294:atrial ventricular junction remodeling;GO:0036302:atrioventricular canal development;GO:0003190:atrioventricular valve formation;GO:0055007:cardiac muscle cell differentiation;GO:0035050:embryonic heart tube development;GO:0003143:embryonic heart tube morphogenesis;GO:0035118:embryonic pectoral fin morphogenesis;GO:0007507:heart development;GO:0003146:hea…	GO:0015629:actin cytoskeleton;GO:0005737:cytoplasm;GO:0005634:nucleus;GO:0032991:macromolecular complex;GO:0032993:protein-DNA complex;	GO:0003700:sequence-specific DNA binding transcription factor activity;GO:0000981:sequence-specific DNA binding RNA polymerase II transcription factor activity;GO:0000978:RNA polymerase II core promoter proximal region sequence-specific DNA binding;GO:0001103:RNA polymerase II repressing transcription factor binding;GO:0043565:sequence-specific DNA binding;	K10179	-
ENSDARG00000095006	1540	0	0	0	0	1	0.04	0	0	19	1.14	0	0	4.63036	4.90072	2.47375	1.98109	0.0475811	0.999831	Ups	22	27529632	27532362	-	CR388079.2	-	-	-	-	-	-
ENSDARG00000103456	1668	1	0.04	4	0.19	13	0.49	5	0.25	40	2.21	19	0.89	15.7581	2.39236	1.20825	1.98002	0.0477015	0.999831	Ups	23	42346799	42358353	+	cyp2aa11	cytochrome P450%2C family 2%2C subfamily AA%2C polypeptide 11 [Source:ZFIN%3BAcc:ZDB-GENE-110114-3]	-	-	-	K17852	-
ENSDARG00000111693	315	28	5.7	17	4.32	41	8.19	8	2.14	5	1.46	8	1.99	15.4882	-1.59398	0.806792	-1.97571	0.0481881	0.999831	Down	18	3004572	3014736	+	CABZ01002690.1	-	GO:0072583:clathrin-mediated endocytosis;GO:0044803:multi-organism membrane organization;GO:0007274:neuromuscular synaptic transmission;GO:0030838:positive regulation of actin filament polymerization;GO:2000601:positive regulation of Arp2/3 complex-mediated actin nucleation;GO:0015031:protein transport;GO:0030833:regulation of actin filament polymerization;	GO:0030054:cell junction;GO:0005905:coated pit;GO:0031594:neuromuscular junction;GO:0005886:plasma membrane;GO:0055037:recycling endosome;	GO:0005547:phosphatidylinositol-3,4,5-trisphosphate binding;GO:0043325:phosphatidylinositol-3,4-bisphosphate binding;	-	-
ENSDARG00000077084	5314	92	1.11	9	0.14	7	0.08	4	0.06	5	0.09	6	0.09	16.2321	-2.26209	1.14502	-1.97559	0.0482011	0.999831	Down	19	25476228	25512695	+	col28a1a	collagen%2C type XXVIII%2C alpha 1a [Source:ZFIN%3BAcc:ZDB-GENE-070705-84]	GO:0007155:cell adhesion;GO:0030198:extracellular matrix organization;	GO:0005604:basement membrane;GO:0005581:collagen trimer;GO:0005788:endoplasmic reticulum lumen;GO:0031012:extracellular matrix;GO:0005576:extracellular region;GO:0005615:extracellular space;	GO:0005201:extracellular matrix structural constituent;GO:0004867:serine-type endopeptidase inhibitor activity;	-	-
ENSDARG00000098152	1697	4	0.15	3	0.14	4	0.15	0	0	0	0	0	0	1.51535	-3.87554	1.9622	-1.9751	0.0482571	0.999831	Down	13	28500327	28513347	-	CR925797.1	-	-	-	-	-	-
ENSDARG00000097846	1055	0	0	0	0	0	0	2	0.16	7	0.61	0	0	2.02504	4.69901	2.38107	1.97349	0.0484402	0.999831	Ups	17	24800332	24802538	+	si:dkey-74h17.3	si:dkey-74h17.3 [Source:ZFIN%3BAcc:ZDB-GENE-131127-415]	-	-	-	-	-
ENSDARG00000062106	1278	23	1.15	12	0.75	111	5.47	15	0.99	4	0.29	6	0.37	23.9883	-2.07334	1.05116	-1.97243	0.0485603	0.999831	Down	9	30800876	30808073	-	klf5b	Kruppel-like factor 5b [Source:ZFIN%3BAcc:ZDB-GENE-080424-4]	GO:0007026:negative regulation of microtubule depolymerization;GO:0000122:negative regulation of transcription from RNA polymerase II promoter;GO:1903861:positive regulation of dendrite extension;GO:0050775:positive regulation of dendrite morphogenesis;GO:0045944:positive regulation of transcription from RNA polymerase II promoter;GO:0006357:regulation of transcription from RNA polymerase II prom…	GO:0005634:nucleus;	GO:0003700:sequence-specific DNA binding transcription factor activity;GO:0046872:metal ion binding;GO:0043565:sequence-specific DNA binding;	K09206	-
ENSDARG00000088836	4997	0	0	8	0.13	17	0.21	1	0.02	100	1.84	34	0.53	32.5756	3.00844	1.52554	1.97205	0.0486036	0.999831	Ups	4	43225728	43260960	+	si:ch211-76m11.5	si:ch211-76m11.5 [Source:ZFIN%3BAcc:ZDB-GENE-041210-278]	-	-	-	K12800	;ko04217 Necroptosis;ko04621 NOD-like receptor signaling pathway;ko04625 C-type lectin receptor signaling pathway;ko05130 Pathogenic Escherichia coli infection;ko05131 Shigellosis;ko05132 Salmonella infection;ko05133 Pertussis;ko05135 Yersinia infection;ko05164 Influenza A;ko05171 Coronavirus disease - COVID-19;
ENSDARG00000007824	9538	67	0.45	51	0.43	81	0.53	18	0.16	18	0.17	28	0.23	39.1288	-1.21629	0.617294	-1.97036	0.0487966	0.999831	Down	11	39672874	39926872	+	camta1b	calmodulin binding transcription activator 1b [Source:ZFIN%3BAcc:ZDB-GENE-080229-1]	GO:0050885:neuromuscular process controlling balance;GO:0070886:positive regulation of calcineurin-NFAT signaling cascade;GO:0035307:positive regulation of protein dephosphorylation;GO:0045944:positive regulation of transcription from RNA polymerase II promoter;	GO:0005829:cytosol;GO:0005730:nucleolus;GO:0005634:nucleus;	GO:0000981:sequence-specific DNA binding RNA polymerase II transcription factor activity;GO:0043565:sequence-specific DNA binding;	-	-
ENSDARG00000019932	2405	0	0	0	0	0	0	0	0	14	0.54	0	0	3.31498	5.42148	2.75588	1.96724	0.0491557	0.999831	Ups	3	18655673	18675688	-	slc5a11	solute carrier family 5 member 11 [Source:ZFIN%3BAcc:ZDB-GENE-041114-9]	GO:0006915:apoptotic process;	GO:0016021:integral component of membrane;GO:0005886:plasma membrane;	GO:0005412:glucose:sodium symporter activity;	K14391	-

## Sheet: Group_RK-VS-STZ_DEGs
geneID	length	S5-1.rawreads	S5-1.FPKM	S5-2.rawreads	S5-2.FPKM	S5-3.rawreads	S5-3.FPKM	S6-1.rawreads	S6-1.FPKM	S6-2.rawreads	S6-2.FPKM	S6-3.rawreads	S6-3.FPKM	baseMean	log2FoldChange	lfcSE	stat	pvalue	padj	Regulation	Chr	Start	End	Strand	GeneSymbol	Description	GO_BP	GO_CC	GO_MF	KO	Pathway
ENSDARG00000092732	3552	266	6.31	8	0.21	290	6.39	5	0.12	7	0.15	3	0.07	85.4333	-5.13553	1.11066	-4.62385	3.76683e-06	0.0998286	Down	22	4772860	4868321	-	si:ch73-256j6.5	si:ch73-256j6.5 [Source:ZFIN%3BAcc:ZDB-GENE-070705-225]	-	-	-	-	-
ENSDARG00000104153	2319	168	6.1	40	1.59	214	7.22	13	0.48	14	0.47	4	0.15	69.0021	-3.68542	0.844236	-4.36539	1.26894e-05	0.130325	Down	7	6879534	6908640	+	prkd4	protein kinase D4 [Source:ZFIN%3BAcc:ZDB-GENE-080204-93]	GO:0007205:protein kinase C-activating G-protein coupled receptor signaling pathway;GO:0089700:protein kinase D signaling;GO:0006468:protein phosphorylation;GO:0030148:sphingolipid biosynthetic process;	GO:0005829:cytosol;GO:0016020:membrane;GO:0005654:nucleoplasm;	GO:0005524:ATP binding;GO:0016301:kinase activity;GO:0046872:metal ion binding;GO:0004697:protein kinase C activity;	K06070	;ko04015 Rap1 signaling pathway;ko04925 Aldosterone synthesis and secretion;
ENSDARG00000102959	1785	596	28.12	14	0.72	434	19.03	10	0.48	24	1.04	10	0.49	164.196	-4.53975	1.04787	-4.33235	1.47527e-05	0.130325	Down	21	2178909	2185600	-	zgc:171220	zgc:171220 [Source:ZFIN%3BAcc:ZDB-GENE-071004-11]	-	-	-	K09228	;ko05168 Herpes simplex virus 1 infection;
ENSDARG00000103634	5779	113	1.65	25	0.4	18	0.24	1728	25.46	2446	32.75	34	0.51	704.855	4.68468	1.19764	3.91159	9.16924e-05	0.607508	Ups	12	43701777	43711918	-	CU914622.2	si:ch73-329n5.6 [Source:NCBI gene%3BAcc:101883339]	-	-	-	-	-
ENSDARG00000057000	2695	68	2.13	7	0.24	33	0.96	231	7.3	711	20.41	184	5.96	188.93	3.33417	0.864663	3.85603	0.000115241	0.610823	Ups	23	20563779	20636740	+	camkvl	CaM kinase-like vesicle-associated%2C like [Source:ZFIN%3BAcc:ZDB-GENE-090311-58]	-	GO:0030659:cytoplasmic vesicle membrane;	GO:0005524:ATP binding;GO:0005516:calmodulin binding;GO:0004683:calmodulin-dependent protein kinase activity;	-	-
ENSDARG00000092887	1345	12679	794.03	11	0.75	2612	151.98	5	0.32	9	0.52	212	13.76	2466.32	-6.20699	1.62865	-3.81113	0.000138333	0.611016	Down	19	27577099	27579835	-	si:dkeyp-46h3.3	si:dkeyp-46h3.3 [Source:ZFIN%3BAcc:ZDB-GENE-060503-748]	-	-	-	-	-
ENSDARG00000035820	1180	19	1.36	9	0.7	9	0.6	0	0	0	0	0	0	6.24371	-6.1677	1.70334	-3.62095	0.000293523	0.824798	Down	7	57432318	57470497	+	drd4b	dopamine receptor D4b [Source:ZFIN%3BAcc:ZDB-GENE-070508-3]	GO:0000187:activation of MAPK activity;GO:0007195:adenylate cyclase-inhibiting dopamine receptor signaling pathway;GO:0008344:adult locomotory behavior;GO:0050482:arachidonic acid secretion;GO:0001662:behavioral fear response;GO:0048148:behavioral response to cocaine;GO:0048149:behavioral response to ethanol;GO:0006874:cellular calcium ion homeostasis;GO:0007268:synaptic transmission;GO:0042417:d…	GO:0030425:dendrite;GO:0005887:integral component of plasma membrane;GO:0016020:membrane;GO:0005886:plasma membrane;GO:0098794:postsynapse;GO:0030424:axon;GO:0043679:axon terminus;GO:0005938:cell cortex;GO:0005737:cytoplasm;GO:0043197:dendritic spine;GO:0043025:neuronal cell body;GO:0043195:terminal bouton;GO:0012506:vesicle membrane;	GO:0035240:dopamine binding;GO:0004952:dopamine neurotransmitter receptor activity;GO:0001591:dopamine neurotransmitter receptor activity, coupled via Gi/Go;GO:0008144:drug binding;GO:0051379:epinephrine binding;GO:0004930:G-protein coupled receptor activity;GO:0004993:serotonin receptor activity;GO:0042802:identical protein binding;GO:0046872:metal ion binding;GO:0030594:neurotransmitter recepto…	K04147	;ko04080 Neuroactive ligand-receptor interaction;ko04728 Dopaminergic synapse;
ENSDARG00000003902	2094	6	0.24	11	0.48	32	1.2	50	2.03	355	13.12	99	4.13	82.2097	3.31037	0.918327	3.60479	0.000312406	0.824798	Ups	17	27456804	27461321	+	ctsl.1	cathepsin L.1 [Source:ZFIN%3BAcc:ZDB-GENE-040718-61]	GO:0030154:cell differentiation;GO:0007275:multicellular organismal development;	GO:0005764:lysosome;	GO:0008234:cysteine-type peptidase activity;	-	-
ENSDARG00000092730	1779	5	0.24	320	16.56	408	17.95	10	0.48	0	0	13	0.64	126.334	-5.03856	1.40936	-3.57506	0.000350143	0.824798	Down	1	43901966	43905263	-	enam	enamelin [Source:ZFIN%3BAcc:ZDB-GENE-071005-4]	-	-	-	-	-
ENSDARG00000073900	2356	18	0.64	10	0.39	65	2.16	27	0.98	384	12.61	738	27.35	180.641	3.62064	1.01997	3.54973	0.000385622	0.824798	Ups	8	28259347	28267364	+	inka2	inka box actin regulator 2 [Source:ZFIN%3BAcc:ZDB-GENE-091230-4]	-	-	-	-	-
ENSDARG00000104185	714	16	1.89	90	11.61	19	2.08	2	0.24	4	0.43	0	0	25.4894	-4.69556	1.33598	-3.5147	0.000440252	0.824798	Down	22	30757562	30770751	-	AL831726.2	uncharacterized LOC101882696 [Source:NCBI gene%3BAcc:101882696]	-	-	-	-	-
ENSDARG00000069230	3521	659	15.77	22	0.58	354	7.87	38	0.92	33	0.73	17	0.42	173.534	-3.48233	0.995586	-3.49777	0.000469165	0.824798	Down	8	18450052	18460791	-	zgc:153738	zgc:153738 [Source:ZFIN%3BAcc:ZDB-GENE-061013-622]	-	GO:0005737:cytoplasm;GO:0005856:cytoskeleton;GO:0031514:motile cilium;	GO:0005524:ATP binding;	-	-
ENSDARG00000076388	1108	2	0.15	168	13.96	16	1.13	3	0.23	0	0	1	0.08	39.4011	-5.83123	1.67554	-3.48022	0.000501009	0.824798	Down	7	8406686	8408014	-	zgc:194686	zgc:194686 [Source:ZFIN%3BAcc:ZDB-GENE-080721-26]	GO:0001816:cytokine production;GO:0042742:defense response to bacterium;GO:0051260:protein homooligomerization;	GO:0005886:plasma membrane;GO:0046930:pore complex;	GO:0048030:disaccharide binding;GO:0005537:mannose binding;GO:0042803:protein homodimerization activity;	-	-
ENSDARG00000100948	851	79	7.82	0	0	62	5.7	0	0	1	0.09	0	0	21.1876	-6.96348	2.00271	-3.47702	0.000507021	0.824798	Down	5	11965113	11971946	-	osm	oncostatin M [Source:ZFIN%3BAcc:ZDB-GENE-141212-278]	-	-	-	-	-
ENSDARG00000091252	3511	0	0	0	0	0	0	41	0.99	1	0.02	19	0.47	10.5261	6.83764	1.97164	3.468	0.000524342	0.824798	Ups	17	21994043	22001935	-	slc22a7b.2	solute carrier family 22 member 7b%2C tandem duplicate 2 [Source:ZFIN%3BAcc:ZDB-GENE-030131-9391]	GO:0006811:ion transport;	GO:0016323:basolateral plasma membrane;GO:0016021:integral component of membrane;GO:0005886:plasma membrane;	GO:0022857:transmembrane transporter activity;	K08204	;ko04976 Bile secretion;
ENSDARG00000078800	2344	4	0.14	10	0.39	4	0.13	44	1.6	37	1.22	118	4.4	33.9352	3.23978	0.934881	3.46545	0.000529355	0.824798	Ups	23	28077953	28091109	+	slc26a10	solute carrier family 26 member 10 [Source:ZFIN%3BAcc:ZDB-GENE-030131-9845]	-	GO:0016323:basolateral plasma membrane;GO:0005887:integral component of plasma membrane;	GO:0015301:anion:anion antiporter activity;GO:0015106:bicarbonate transmembrane transporter activity;GO:0015108:chloride transmembrane transporter activity;GO:0019531:oxalate transmembrane transporter activity;GO:0008271:secondary active sulfate transmembrane transporter activity;GO:0015116:sulfate transmembrane transporter activity;	K14707	-
ENSDARG00000043443	6938	1	0.01	1	0.01	0	0	10	0.12	76	0.85	10	0.13	14.6247	5.35423	1.54952	3.45542	0.000549439	0.824798	Ups	15	40217256	40267485	-	kcnj13	potassium inwardly rectifying channel subfamily J member 13 [Source:ZFIN%3BAcc:ZDB-GENE-070129-1]	-	-	-	K05006	;ko04974 Protein digestion and absorption;
ENSDARG00000100612	5502	0	0	443	7.41	135	1.92	2	0.03	2	0.03	13	0.21	115.682	-5.46863	1.6003	-3.41726	0.00063254	0.824798	Down	7	7988986	8022741	-	si:ch211-163c2.1	si:ch211-163c2.1 [Source:ZFIN%3BAcc:ZDB-GENE-160114-75]	-	-	-	K15261	-
ENSDARG00000100792	4802	1	0.02	1	0.02	1	0.02	11	0.2	77	1.24	7	0.13	14.6493	4.82823	1.41653	3.4085	0.000653213	0.824798	Ups	1	50794669	50838160	-	zgc:154142	zgc:154142 [Source:ZFIN%3BAcc:ZDB-GENE-070615-2]	-	-	-	-	-
ENSDARG00000054753	2639	6	0.19	336	11.72	533	15.81	29	0.94	9	0.26	14	0.46	151.053	-4.03447	1.18628	-3.40093	0.000671579	0.824798	Down	17	15542077	15546862	-	col10a1a	collagen%2C type X%2C alpha 1a [Source:ZFIN%3BAcc:ZDB-GENE-030131-8373]	GO:0030198:extracellular matrix organization;GO:0001501:skeletal system development;	GO:0005581:collagen trimer;GO:0005788:endoplasmic reticulum lumen;GO:0031012:extracellular matrix;GO:0005576:extracellular region;GO:0005615:extracellular space;	GO:0005201:extracellular matrix structural constituent;GO:0030020:extracellular matrix structural constituent conferring tensile strength;GO:0046872:metal ion binding;	K19479	;ko04974 Protein digestion and absorption;
ENSDARG00000095930	5915	132	1.88	284	4.42	425	5.62	666	9.59	3032	39.66	1222	18.04	875.092	2.41782	0.712244	3.39466	0.00068715	0.824798	Ups	5	32246872	32257316	+	myha	myosin%2C heavy chain a [Source:ZFIN%3BAcc:ZDB-GENE-060531-50]	-	GO:0030016:myofibril;GO:0032982:myosin filament;	GO:0051015:actin filament binding;GO:0005524:ATP binding;GO:0005516:calmodulin binding;GO:0003774:motor activity;	K10352	;ko04270 Vascular smooth muscle contraction;ko04530 Tight junction;ko04810 Regulation of actin cytoskeleton;ko05130 Pathogenic Escherichia coli infection;
ENSDARG00000074816	939	3	0.27	61	5.98	1	0.08	0	0	0	0	0	0	13.8064	-7.30943	2.15467	-3.39237	0.000692905	0.824798	Down	8	36354125	36362830	+	si:zfos-367g9.1	si:zfos-367g9.1 [Source:ZFIN%3BAcc:ZDB-GENE-091204-401]	-	-	-	K06752	;ko04145 Phagosome;ko04514 Cell adhesion molecules;ko04612 Antigen processing and presentation;ko04640 Hematopoietic cell lineage;ko04658 Th1 and Th2 cell differentiation;ko04659 Th17 cell differentiation;ko04672 Intestinal immune network for IgA production;ko04940 Type I diabetes mellitus;ko05140 Leishmaniasis;ko05145 Toxoplasmosis;ko05150 Staphylococcus aureus infection;ko05152 Tuberculosis;ko0…
ENSDARG00000042396	5217	149	2.41	3	0.05	41	0.62	4	0.07	3	0.04	3	0.05	32.1563	-4.258	1.25848	-3.38345	0.000715808	0.824798	Down	18	7611298	7622892	+	odf3b	tripartite motif containing 35-30 [Source:ZFIN%3BAcc:ZDB-GENE-060503-557]	-	GO:0005737:cytoplasm;	-	-	-
ENSDARG00000006207	866	37	3.6	38	4.04	104	9.4	792	77.86	1056	94.35	26	2.62	330.843	3.44852	1.03991	3.31618	0.000912559	0.999779	Ups	6	42338309	42341219	+	gpx1b	glutathione peroxidase 1b [Source:ZFIN%3BAcc:ZDB-GENE-040912-60]	GO:0006979:response to oxidative stress;	GO:0005737:cytoplasm;	GO:0004602:glutathione peroxidase activity;	K00432	;ko00480 Glutathione metabolism;ko00590 Arachidonic acid metabolism;ko01100 Metabolic pathways;ko04918 Thyroid hormone synthesis;ko05014 Amyotrophic lateral sclerosis;ko05016 Huntington disease;ko05022 Pathways of neurodegeneration - multiple diseases;
ENSDARG00000093040	1227	113	7.76	0	0	15	0.96	0	0	1	0.06	0	0	20.7424	-6.9314	2.10752	-3.2889	0.00100581	0.999779	Down	9	11822379	11855305	-	AL935144.1	-	-	-	-	-	-
ENSDARG00000036304	1410	52	3.11	0	0	25	1.39	0	0	0	0	0	0	11.8127	-7.09244	2.16913	-3.26972	0.00107653	0.999779	Down	24	36903172	36910224	-	dnaaf3l	dynein%2C axonemal%2C assembly factor 3 like [Source:ZFIN%3BAcc:ZDB-GENE-150903-1]	GO:0070286:axonemal dynein complex assembly;GO:0003341:cilium movement;GO:0044458:motile cilium assembly;	GO:0005737:cytoplasm;	-	-	-
ENSDARG00000074132	1037	1	0.08	159	14.12	364	27.47	12	0.99	1	0.07	6	0.51	84.7107	-4.66254	1.42601	-3.26965	0.00107682	0.999779	Down	1	43917934	43920576	-	scpp7	secretory calcium-binding phosphoprotein 7 [Source:ZFIN%3BAcc:ZDB-GENE-090313-257]	-	-	-	-	-
ENSDARG00000089515	880	61	5.84	1	0.1	38	3.38	1	0.1	1	0.09	2	0.2	15.8114	-4.61529	1.43433	-3.21774	0.00129204	0.999779	Down	19	27568231	27570333	-	si:dkeyp-46h3.5	si:dkeyp-46h3.5 [Source:ZFIN%3BAcc:ZDB-GENE-060503-937]	-	-	-	-	-
ENSDARG00000094433	1993	2	0.08	76	3.51	28	1.1	0	0	0	0	3	0.13	20.7988	-5.50038	1.71399	-3.2091	0.00133152	0.999779	Down	1	58105762	58115298	-	caspbl	caspase b%2C like [Source:ZFIN%3BAcc:ZDB-GENE-090311-53]	GO:0006919:activation of cysteine-type endopeptidase activity involved in apoptotic process;GO:0006915:apoptotic process;GO:0043065:positive regulation of apoptotic process;	GO:0005737:cytoplasm;	GO:0004197:cysteine-type endopeptidase activity;GO:0097199:cysteine-type endopeptidase activity involved in apoptotic signaling pathway;	-	-
ENSDARG00000055523	3108	2	0.05	3	0.09	3	0.08	84	2.3	7	0.17	23	0.65	21.3376	3.88824	1.22371	3.17743	0.00148588	0.999779	Ups	21	28478663	28494322	+	slc22a6l	solute carrier family 22 member 6%2C like [Source:NCBI gene%3BAcc:404609]	-	GO:0016021:integral component of membrane;GO:0005886:plasma membrane;	GO:0022857:transmembrane transporter activity;	K08203	-
ENSDARG00000098365	1437	1	0.06	43	2.76	2	0.11	0	0	0	0	0	0	9.71526	-6.80031	2.17388	-3.12819	0.00175889	0.999779	Down	5	12065957	12093618	-	lrrc74b	leucine rich repeat containing 74B [Source:ZFIN%3BAcc:ZDB-GENE-141212-96]	-	-	-	-	-
ENSDARG00000103806	1288	0	0	273	19.51	31	1.88	4	0.26	0	0	4	0.27	64.3158	-5.58388	1.80946	-3.08594	0.00202913	0.999779	Down	3	6360774	6370802	+	BX004785.3	-	-	-	-	-	-
ENSDARG00000103692	3347	0	0	0	0	0	0	8	0.2	10	0.23	7	0.18	3.94127	5.4226	1.7586	3.08347	0.00204603	0.999779	Ups	15	14674928	14755318	-	p4ha3	prolyl 4-hydroxylase%2C alpha polypeptide III [Source:ZFIN%3BAcc:ZDB-GENE-041010-4]	GO:0018401:peptidyl-proline hydroxylation to 4-hydroxy-L-proline;	GO:0005783:endoplasmic reticulum;GO:0005788:endoplasmic reticulum lumen;	GO:0005506:iron ion binding;GO:0031418:L-ascorbic acid binding;GO:0016702:oxidoreductase activity, acting on single donors with incorporation of molecular oxygen, incorporation of two atoms of oxygen;GO:0004656:procollagen-proline 4-dioxygenase activity;	K00472	;ko00330 Arginine and proline metabolism;ko01100 Metabolic pathways;
ENSDARG00000092061	1238	38	2.59	0	0	21	1.33	0	0	0	0	0	0	8.98453	-6.69847	2.17812	-3.07534	0.0021026	0.999779	Down	13	9074797	9091354	-	HTRA2	si:dkey-112g5.13 [Source:ZFIN%3BAcc:ZDB-GENE-081028-21]	GO:0008344:adult locomotory behavior;GO:0007628:adult walking behavior;GO:0007568:aging;GO:0044257:cellular protein catabolic process;GO:0071363:cellular response to growth factor stimulus;GO:0034605:cellular response to heat;GO:0035458:cellular response to interferon-beta;GO:0034599:cellular response to oxidative stress;GO:0071300:cellular response to retinoic acid;GO:0006672:ceramide metabolic …	GO:0035631:CD40 receptor complex;GO:0000785:chromatin;GO:0009898:cytoplasmic side of plasma membrane;GO:0005856:cytoskeleton;GO:0005829:cytosol;GO:0016020:membrane;GO:0005758:mitochondrial intermembrane space;GO:0031966:mitochondrial membrane;GO:0005739:mitochondrion;GO:0005634:nucleus;	GO:0042802:identical protein binding;GO:0008233:peptidase activity;GO:0004252:serine-type endopeptidase activity;GO:0008236:serine-type peptidase activity;	K08669	;ko04210 Apoptosis;ko04214 Apoptosis - fly;ko04215 Apoptosis - multiple species;ko05012 Parkinson disease;ko05022 Pathways of neurodegeneration - multiple diseases;
ENSDARG00000100429	3105	4	0.11	92	2.73	43	1.08	4	0.11	4	0.1	0	0	27.4067	-4.32056	1.40639	-3.07208	0.0021257	0.999779	Down	3	938438	945007	+	irgf4	immunity-related GTPase family%2C f4 [Source:ZFIN%3BAcc:ZDB-GENE-060929-404]	-	-	-	K12012	-
ENSDARG00000116570	1489	53	3	1	0.06	1	0.05	0	0	0	0	0	0	9.09906	-6.71442	2.21345	-3.03347	0.0024176	0.999779	Down	17	50052174	50054025	-	FO834825.3	-	-	GO:0005634:nucleus;	GO:0003677:DNA binding;GO:0000981:sequence-specific DNA binding RNA polymerase II transcription factor activity;GO:0046872:metal ion binding;	K09228	;ko05168 Herpes simplex virus 1 infection;
ENSDARG00000063153	2605	2	0.06	0	0	0	0	5	0.16	136	4.04	1	0.03	20.9724	5.96043	1.96687	3.03042	0.00244215	0.999779	Ups	6	6491013	6541519	+	bcl11ab	BAF chromatin remodeling complex subunit BCL11A b [Source:ZFIN%3BAcc:ZDB-GENE-061009-4]	GO:0030517:negative regulation of axon extension;GO:2000173:negative regulation of branching morphogenesis of a nerve;GO:0048671:negative regulation of collateral sprouting;GO:2000171:negative regulation of dendrite development;GO:1903860:negative regulation of dendrite extension;GO:0010977:negative regulation of neuron projection development;GO:0032463:negative regulation of protein homooligomer…	GO:0005737:cytoplasm;GO:0005654:nucleoplasm;GO:0005634:nucleus;GO:0014069:postsynaptic density;	GO:0003700:sequence-specific DNA binding transcription factor activity;GO:0000981:sequence-specific DNA binding RNA polymerase II transcription factor activity;GO:0001227:RNA polymerase II transcription regulatory region sequence-specific DNA binding transcription factor activity involved in negative regulation of transcription;GO:0046872:metal ion binding;GO:0046982:protein heterodimerization ac…	-	-
ENSDARG00000088022	2865	6	0.18	391	12.57	368	10.05	32	0.95	27	0.73	11	0.34	144.374	-3.54187	1.17123	-3.02405	0.00249413	0.999779	Down	3	325757	336299	-	mhc1zfa	major histocompatibility complex class I ZFA [Source:ZFIN%3BAcc:ZDB-GENE-130206-9]	-	-	-	K12473	;ko04144 Endocytosis;ko04913 Ovarian steroidogenesis;ko04925 Aldosterone synthesis and secretion;ko04927 Cortisol synthesis and secretion;ko04934 Cushing syndrome;ko04976 Bile secretion;ko04979 Cholesterol metabolism;ko05145 Toxoplasmosis;ko05160 Hepatitis C;
ENSDARG00000102972	1859	3	0.14	8	0.4	8	0.34	30	1.37	42	1.75	45	2.11	21.3978	2.50303	0.829728	3.01669	0.00255548	0.999779	Ups	12	49100365	49102223	+	CABZ01075125.1	-	-	-	-	-	-
ENSDARG00000061635	6200	109	1.48	29	0.43	111	1.4	347	4.77	459	5.73	180	2.54	195.271	2.01811	0.669948	3.01234	0.00259244	0.999779	Ups	18	38900092	39042201	+	myo5aa	myosin VAa [Source:ZFIN%3BAcc:ZDB-GENE-041027-2]	GO:0030048:actin filament-based movement;GO:0032869:cellular response to insulin stimulus;GO:0007268:synaptic transmission;GO:0048066:developmental pigmentation;GO:0051643:endoplasmic reticulum localization;GO:0006887:exocytosis;GO:0048820:hair follicle maturation;GO:0030073:insulin secretion;GO:0031987:locomotion involved in locomotory behavior;GO:0042759:long-chain fatty acid biosynthetic proce…	GO:0005884:actin filament;GO:0042641:actomyosin;GO:0042642:actomyosin, myosin complex part;GO:0030424:axon;GO:0005737:cytoplasm;GO:0005829:cytosol;GO:0030425:dendrite;GO:0005769:early endosome;GO:0032433:filopodium tip;GO:0005794:Golgi apparatus;GO:0032593:insulin-responsive compartment;GO:0005882:intermediate filament;GO:0005770:late endosome;GO:0005764:lysosome;GO:0042470:melanosome;GO:0016020:…	GO:0003779:actin binding;GO:0051015:actin filament binding;GO:0005524:ATP binding;GO:0043008:ATP-dependent protein binding;GO:0005509:calcium ion binding;GO:0048306:calcium-dependent protein binding;GO:0005516:calmodulin binding;GO:0042802:identical protein binding;GO:0000146:microfilament motor activity;GO:0003774:motor activity;GO:0046983:protein dimerization activity;GO:0046982:protein heterod…	K10357	;ko05130 Pathogenic Escherichia coli infection;
ENSDARG00000076573	2420	2	0.07	84	3.2	7	0.23	1	0.04	3	0.1	1	0.04	20.1477	-4.65101	1.54945	-3.00172	0.0026846	0.999779	Down	3	2013324	2033105	-	si:dkey-88j15.3	si:dkey-88j15.3 [Source:ZFIN%3BAcc:ZDB-GENE-100922-28]	-	-	-	-	-
ENSDARG00000038587	2613	0	0	0	0	3	0.09	90	2.93	2	0.06	9	0.3	18.7294	5.4263	1.8159	2.98821	0.0028062	0.999779	Ups	2	45159855	45162467	+	CU929150.1	uncharacterized LOC100004199 [Source:NCBI gene%3BAcc:100004199]	-	-	-	-	-
ENSDARG00000090685	1417	116	6.9	24	1.56	79	4.36	11	0.66	17	0.93	18	1.11	41.633	-2.28219	0.778593	-2.93117	0.00337688	0.999779	Down	24	36227074	36238054	-	tmem241	transmembrane protein 241 [Source:ZFIN%3BAcc:ZDB-GENE-131127-368]	-	GO:0016021:integral component of membrane;	-	-	-
ENSDARG00000079145	3164	0	0	0	0	0	0	0	0	65	1.59	4	0.11	9.93084	6.75945	2.34269	2.88534	0.00390996	0.999779	Ups	22	8313513	8326972	+	CABZ01077217.1	uncharacterized LOC100007503 [Source:NCBI gene%3BAcc:100007503]	-	-	-	-	-
ENSDARG00000006848	7162	162	1.91	7	0.09	4	0.04	1009	11.99	768	8.3	195	2.38	355.319	3.50328	1.22393	2.86233	0.00420543	0.999779	Ups	9	23754275	23765480	-	parp9	poly(ADP-ribose) polymerase family member 9 [Source:ZFIN%3BAcc:ZDB-GENE-081104-179]	GO:0006915:apoptotic process;GO:0007249:I-kappaB kinase/NF-kappaB signaling;GO:1902042:negative regulation of extrinsic apoptotic signaling pathway via death domain receptors;GO:0050769:positive regulation of neurogenesis;	GO:0005737:cytoplasm;	-	K15260	-
ENSDARG00000011671	5593	8	0.12	6	0.1	5	0.07	45	0.69	49	0.68	20	0.31	21.584	2.50508	0.875922	2.85993	0.0042373	0.999779	Ups	21	20356458	20376607	+	pde6b	phosphodiesterase 6B%2C cGMP-specific%2C rod%2C beta [Source:ZFIN%3BAcc:ZDB-GENE-090421-2]	GO:0009583:detection of light stimulus;GO:0007186:G-protein coupled receptor signaling pathway;GO:0051480:cytosolic calcium ion homeostasis;GO:0060041:retina development in camera-type eye;GO:0007601:visual perception;	GO:0016020:membrane;GO:0001750:photoreceptor outer segment;	GO:0047555:3',5'-cyclic-GMP phosphodiesterase activity;GO:0046872:metal ion binding;	K13756	;ko00230 Purine metabolism;ko01100 Metabolic pathways;ko04744 Phototransduction;
ENSDARG00000105263	778	6	0.65	205	24.26	70	7.04	3	0.33	22	2.19	4	0.45	58.6206	-3.64881	1.27627	-2.85895	0.00425042	0.999779	Down	7	39706004	39707161	+	ccl36.1	chemokine (C-C motif) ligand 36%2C duplicate 1 [Source:ZFIN%3BAcc:ZDB-GENE-140718-2]	-	-	-	-	-
ENSDARG00000076508	3939	46	0.98	2	0.05	2	0.04	0	0	1	0.02	0	0	8.4318	-5.61807	1.97405	-2.84596	0.00442772	0.999779	Down	25	26921480	27237323	+	grm8b	glutamate receptor%2C metabotropic 8b [Source:ZFIN%3BAcc:ZDB-GENE-110421-3]	GO:0007196:adenylate cyclase-inhibiting G-protein coupled glutamate receptor signaling pathway;GO:0007193:adenylate cyclase-inhibiting G-protein coupled receptor signaling pathway;GO:0007268:synaptic transmission;GO:0050966:detection of mechanical stimulus involved in sensory perception of pain;GO:0007216:G-protein coupled glutamate receptor signaling pathway;GO:0046928:regulation of neurotransmi…	GO:0005887:integral component of plasma membrane;GO:0043005:neuron projection;GO:0043025:neuronal cell body;GO:0042734:presynaptic membrane;	GO:0004930:G-protein coupled receptor activity;GO:0008066:glutamate receptor activity;GO:0001642:group III metabotropic glutamate receptor activity;	K04608	;ko04072 Phospholipase D signaling pathway;ko04080 Neuroactive ligand-receptor interaction;ko04724 Glutamatergic synapse;
ENSDARG00000012422	8059	18	0.19	39	0.45	33	0.32	5	0.05	6	0.06	7	0.08	18.4638	-2.47203	0.870484	-2.83983	0.0045138	0.999779	Down	19	7179740	7225206	-	col11a2	collagen%2C type XI%2C alpha 2 [Source:ZFIN%3BAcc:ZDB-GENE-000208-23]	GO:0001568:blood vessel development;GO:0007155:cell adhesion;GO:0016477:cell migration;GO:0032964:collagen biosynthetic process;GO:0030199:collagen fibril organization;GO:0030198:extracellular matrix organization;GO:0048592:eye morphogenesis;GO:0003007:heart morphogenesis;GO:0045112:integrin biosynthetic process;GO:1903225:negative regulation of endodermal cell differentiation;GO:0051128:regulati…	GO:0005604:basement membrane;GO:0005588:collagen type V trimer;GO:0005788:endoplasmic reticulum lumen;GO:0031012:extracellular matrix;GO:0005576:extracellular region;GO:0005615:extracellular space;GO:0005581:collagen trimer;GO:0005592:collagen type XI trimer;	GO:0005201:extracellular matrix structural constituent;GO:0030020:extracellular matrix structural constituent conferring tensile strength;GO:0008201:heparin binding;GO:0005178:integrin binding;GO:0046872:metal ion binding;GO:0048407:platelet-derived growth factor binding;GO:0043394:proteoglycan binding;GO:0050840:extracellular matrix binding;GO:0030674:protein binding, bridging;	K06236	;ko04151 PI3K-Akt signaling pathway;ko04510 Focal adhesion;ko04512 ECM-receptor interaction;ko04611 Platelet activation;ko04926 Relaxin signaling pathway;ko04933 AGE-RAGE signaling pathway in diabetic complications;ko04974 Protein digestion and absorption;ko05146 Amoebiasis;ko05165 Human papillomavirus infection;ko05205 Proteoglycans in cancer;
ENSDARG00000076264	792	63	6.7	0	0	1	0.1	0	0	0	0	0	0	10.5347	-6.92563	2.47665	-2.79637	0.00516809	0.999779	Down	22	4797508	4798738	-	zgc:195170	zgc:195170 [Source:ZFIN%3BAcc:ZDB-GENE-080723-62]	-	-	-	-	-
ENSDARG00000023151	3098	19	0.52	4	0.12	51	1.29	417	11.46	20	0.5	120	3.38	108.447	3.19894	1.14631	2.79065	0.00526028	0.999779	Ups	1	53374454	53388914	+	ucp1	uncoupling protein 1 [Source:ZFIN%3BAcc:ZDB-GENE-010503-1]	GO:0006839:mitochondrial transport;GO:0007568:aging;GO:0032870:cellular response to hormone stimulus;GO:0006631:fatty acid metabolic process;GO:0006629:lipid metabolic process;GO:1990542:mitochondrial transmembrane transport;GO:1902600:hydrogen ion transmembrane transport;GO:0007585:respiratory gaseous exchange;GO:0014823:response to activity;GO:0009409:response to cold;GO:0051384:response to glu…	GO:0016021:integral component of membrane;GO:0005743:mitochondrial inner membrane;GO:0005739:mitochondrion;	GO:0022857:transmembrane transporter activity;GO:0017077:oxidative phosphorylation uncoupler activity;GO:0005215:transporter activity;	K15103	-
ENSDARG00000092918	1914	1	0.04	2	0.1	8	0.33	115	5.12	38	1.54	1	0.05	28.6459	4.02642	1.44547	2.78554	0.00534379	0.999779	Ups	14	32783972	32788046	+	crhr2	corticotropin releasing hormone receptor 2 [Source:NCBI gene%3BAcc:100002312]	-	-	-	-	-
ENSDARG00000069662	1521	43	2.38	4	0.24	10	0.51	0	0	2	0.1	2	0.11	9.83357	-3.95321	1.42635	-2.77156	0.00557888	0.999779	Down	7	22330466	22525531	+	fgf11a	fibroblast growth factor 11a [Source:ZFIN%3BAcc:ZDB-GENE-050221-5]	GO:0007267:cell-cell signaling;GO:0007399:nervous system development;GO:0007165:signal transduction;	GO:0005576:extracellular region;	GO:0008083:growth factor activity;	K04358	;ko04010 MAPK signaling pathway;ko04014 Ras signaling pathway;ko04015 Rap1 signaling pathway;ko04020 Calcium signaling pathway;ko04151 PI3K-Akt signaling pathway;ko04810 Regulation of actin cytoskeleton;ko05200 Pathways in cancer;ko05218 Melanoma;ko05224 Breast cancer;ko05226 Gastric cancer;
ENSDARG00000007769	1980	3	0.13	13	0.6	13	0.51	94	4.04	187	7.31	7	0.31	50.3951	3.19822	1.15645	2.76554	0.00568292	0.999779	Ups	7	56602521	56606752	-	sult5a1	sulfotransferase family 5A%2C member 1 [Source:ZFIN%3BAcc:ZDB-GENE-060929-978]	-	-	-	K01015	;ko00140 Steroid hormone biosynthesis;
ENSDARG00000108939	2664	0	0	93	3.21	196	5.76	3	0.1	11	0.32	4	0.13	48.0925	-4.05491	1.46679	-2.76447	0.00570148	0.999779	Down	5	58487368	58512609	+	FQ378016.1	high affinity cGMP-specific 3'%2C5'-cyclic phosphodiesterase 9A-like [Source:NCBI gene%3BAcc:571737]	GO:0046069:cGMP catabolic process;GO:0046068:cGMP metabolic process;GO:0019934:cGMP-mediated signaling;GO:0010613:positive regulation of cardiac muscle hypertrophy;GO:0007165:signal transduction;	GO:0005783:endoplasmic reticulum;GO:0005794:Golgi apparatus;GO:0043204:perikaryon;GO:0048471:perinuclear region of cytoplasm;GO:0032587:ruffle membrane;GO:0042383:sarcolemma;GO:0005829:cytosol;	GO:0047555:3',5'-cyclic-GMP phosphodiesterase activity;GO:0042802:identical protein binding;GO:0046872:metal ion binding;GO:0004114:3',5'-cyclic-nucleotide phosphodiesterase activity;	K13761	;ko00230 Purine metabolism;ko01100 Metabolic pathways;
ENSDARG00000030156	3659	190	4.37	46	1.16	69	1.48	23	0.54	29	0.61	22	0.53	61.8593	-2.11077	0.77115	-2.73717	0.00619693	0.999779	Down	24	36303637	36316104	-	naglu	N-acetylglucosaminidase%2C alpha [Source:ZFIN%3BAcc:ZDB-GENE-100726-2]	GO:0021680:cerebellar Purkinje cell layer development;GO:0006027:glycosaminoglycan catabolic process;GO:0060119:inner ear receptor cell development;GO:0045475:locomotor rhythm;GO:0007040:lysosome organization;GO:0042474:middle ear morphogenesis;GO:0007399:nervous system development;GO:0046548:retinal rod cell development;	GO:0070062:extracellular exosome;GO:0043202:lysosomal lumen;GO:0005764:lysosome;	GO:0004561:alpha-N-acetylglucosaminidase activity;	K01205	;ko00531 Glycosaminoglycan degradation;ko01100 Metabolic pathways;ko04142 Lysosome;
ENSDARG00000030349	1702	10	0.49	4	0.22	12	0.55	0	0	0	0	1	0.05	4.20835	-4.59634	1.68261	-2.73167	0.00630149	0.999779	Down	6	13780205	13783634	-	cryba2a	crystallin%2C beta A2a [Source:ZFIN%3BAcc:ZDB-GENE-040625-8]	GO:0002088:lens development in camera-type eye;GO:0007601:visual perception;	-	GO:0005212:structural constituent of eye lens;	-	-
ENSDARG00000015546	2200	162	6.2	179	7.49	62	2.21	34	1.32	44	1.55	10	0.4	87.5409	-2.38062	0.871537	-2.73152	0.00630423	0.999779	Down	11	27968834	28010171	+	alpl	alkaline phosphatase%2C biomineralization associated [Source:ZFIN%3BAcc:ZDB-GENE-040420-1]	-	GO:0031225:anchored component of membrane;GO:0005886:plasma membrane;	GO:0004035:alkaline phosphatase activity;GO:0046872:metal ion binding;	K01077	;ko00730 Thiamine metabolism;ko00790 Folate biosynthesis;ko01100 Metabolic pathways;ko01240 Biosynthesis of cofactors;ko02020 Two-component system;
ENSDARG00000117216	5639	21	0.31	36	0.59	10	0.14	2	0.03	5	0.07	4	0.06	14.2084	-2.88378	1.06365	-2.7112	0.00670398	0.999779	Down	1	52353162	52363107	+	LO017718.1	-	-	-	-	-	-
ENSDARG00000100084	1503	153	8.57	107	6.55	186	9.68	249	14.1	452	23.27	380	22.08	238.775	1.20114	0.44415	2.70435	0.00684373	0.999779	Ups	18	5362559	5392667	-	CABZ01084603.1	-	-	-	-	-	-
ENSDARG00000113971	3254	0	0	0	0	0	0	0	0	56	1.33	2	0.05	8.34642	6.5089	2.41184	2.69873	0.0069604	0.999779	Ups	4	73973242	73983880	+	LO018181.1	gastrula zinc finger protein XlCGF49.1-like [Source:NCBI gene%3BAcc:100149352]	-	-	-	-	-
ENSDARG00000099295	662	20	2.54	0	0	16	1.89	0	0	0	0	0	0	5.36669	-5.95778	2.21521	-2.68949	0.00715614	0.999779	Down	22	7439255	7442462	-	BX511034.4	-	-	-	-	-	-
ENSDARG00000035184	2188	6	0.23	11	0.46	9	0.32	51	1.98	40	1.41	34	1.36	24.6989	2.17525	0.809353	2.68765	0.00719573	0.999779	Ups	5	55934129	55952128	+	tmem150ab	transmembrane protein 150Ab [Source:ZFIN%3BAcc:ZDB-GENE-040426-1576]	GO:0046854:phosphatidylinositol phosphorylation;GO:0072659:protein localization to plasma membrane;GO:0010506:regulation of autophagy;	GO:0005887:integral component of plasma membrane;GO:0005764:lysosome;	-	-	-
ENSDARG00000020136	996	13	1.1	4	0.37	7	0.55	11	0.94	48	3.73	115	10.08	29.518	2.70985	1.00887	2.68603	0.00723059	0.999779	Ups	5	33339762	33347993	+	ptges	prostaglandin E synthase [Source:ZFIN%3BAcc:ZDB-GENE-050407-2]	GO:0071347:cellular response to interleukin-1;GO:0006749:glutathione metabolic process;GO:0008285:negative regulation of cell proliferation;GO:0055114:oxidation-reduction process;GO:0001516:prostaglandin biosynthetic process;	GO:0016021:integral component of membrane;GO:0005739:mitochondrion;GO:0005641:nuclear envelope lumen;	GO:0043295:glutathione binding;GO:0004364:glutathione transferase activity;GO:0050220:prostaglandin-E synthase activity;	K15729	;ko00590 Arachidonic acid metabolism;ko01100 Metabolic pathways;
ENSDARG00000112132	3878	0	0	1	0.02	0	0	31	0.68	19	0.38	0	0	8.71971	5.56835	2.07942	2.67783	0.00740997	0.999779	Ups	16	40217043	40220920	+	BX470182.1	-	-	-	-	-	-
ENSDARG00000080152	83	5	5.07	7	7.76	7	6.6	109	111.81	188	175.26	0	0	50.5774	3.87545	1.44814	2.67615	0.00744724	0.999779	Ups	6	47467910	47467992	+	dre-mir-29b-1	dre-mir-29b-1 [Source:miRBase%3BAcc:MI0001933]	-	-	-	-	-
ENSDARG00000071590	966	2	0.17	0	0	0	0	0	0	110	8.81	7	0.63	17.1698	5.66641	2.12548	2.66594	0.00767724	0.999779	Ups	22	9806867	9808794	+	si:ch211-236g6.1	si:ch211-236g6.1 [Source:ZFIN%3BAcc:ZDB-GENE-050208-448]	-	-	-	-	-
ENSDARG00000079293	1937	15	0.65	43	2.04	15	0.61	4	0.18	5	0.2	4	0.18	15.7471	-2.73712	1.02703	-2.66507	0.00769717	0.999779	Down	21	22311964	22325124	-	gdpd4b	glycerophosphodiester phosphodiesterase domain containing 4b [Source:ZFIN%3BAcc:ZDB-GENE-050309-133]	-	-	-	-	-
ENSDARG00000090869	1512	0	0	0	0	0	0	3	0.17	14	0.72	4	0.23	3.15175	5.10691	1.9175	2.66331	0.00773751	0.999779	Ups	22	6881445	6884981	-	FO904898.4	uncharacterized LOC100333939 [Source:NCBI gene%3BAcc:100333939]	-	-	-	-	-
ENSDARG00000104626	2196	4	0.15	72	3.02	1519	54.13	50	1.94	27	0.95	1	0.04	225.44	-3.99476	1.50946	-2.64648	0.00813333	0.999779	Down	1	58491504	58505626	-	si:ch73-236c18.8	si:ch73-236c18.8 [Source:ZFIN%3BAcc:ZDB-GENE-121214-113]	GO:0006974:cellular response to DNA damage stimulus;GO:0046061:dATP catabolic process;GO:0051607:defense response to virus;GO:0009264:deoxyribonucleotide catabolic process;GO:0006203:dGTP catabolic process;GO:0000724:double-strand break repair via homologous recombination;GO:0045087:innate immune response;GO:0060339:negative regulation of type I interferon-mediated signaling pathway;GO:0051289:pr…	GO:0005634:nucleus;GO:0035861:site of double-strand break;	GO:0032567:dGTP binding;GO:0008832:dGTPase activity;GO:0005525:GTP binding;GO:0003676:nucleic acid binding;GO:0003723:RNA binding;GO:0003697:single-stranded DNA binding;GO:0016793:triphosphoric monoester hydrolase activity;GO:0008270:zinc ion binding;	-	-
ENSDARG00000094206	647	0	0	0	0	0	0	6	0.79	36	4.31	0	0	6.29618	6.10157	2.30806	2.64359	0.00820319	0.999779	Ups	1	8978908	8980665	-	si:ch73-191k20.3	si:ch73-191k20.3 [Source:ZFIN%3BAcc:ZDB-GENE-090312-62]	-	-	-	-	-
ENSDARG00000103833	411	0	0	0	0	0	0	0	0	59	11.11	1	0.21	8.63325	6.55742	2.48154	2.64248	0.00823017	0.999779	Ups	14	15170667	15171477	-	spink2.2	serine peptidase inhibitor%2C Kazal type 2%2C tandem duplicate 2 [Source:ZFIN%3BAcc:ZDB-GENE-141216-292]	-	-	-	-	-
ENSDARG00000024894	2167	17	0.66	0	0	17	0.61	0	0	0	0	0	0	5.00014	-5.85675	2.21938	-2.63892	0.00831718	0.999779	Down	5	72264192	72289648	-	tbx5a	T-box transcription factor 5a [Source:NCBI gene%3BAcc:30071]	GO:0009887:organ morphogenesis;GO:0003294:atrial ventricular junction remodeling;GO:0036302:atrioventricular canal development;GO:0003190:atrioventricular valve formation;GO:0055007:cardiac muscle cell differentiation;GO:0035050:embryonic heart tube development;GO:0003143:embryonic heart tube morphogenesis;GO:0035118:embryonic pectoral fin morphogenesis;GO:0007507:heart development;GO:0003146:hea…	GO:0015629:actin cytoskeleton;GO:0005737:cytoplasm;GO:0005634:nucleus;GO:0032991:macromolecular complex;GO:0032993:protein-DNA complex;	GO:0003700:sequence-specific DNA binding transcription factor activity;GO:0000981:sequence-specific DNA binding RNA polymerase II transcription factor activity;GO:0000978:RNA polymerase II core promoter proximal region sequence-specific DNA binding;GO:0001103:RNA polymerase II repressing transcription factor binding;GO:0043565:sequence-specific DNA binding;	K10179	-
ENSDARG00000070672	2291	1	0.04	0	0	0	0	35	1.3	3	0.1	1	0.04	7.25613	5.30199	2.01474	2.63161	0.00849821	0.999779	Ups	11	19490335	19501440	-	slc2a9l1	solute carrier family 2 member 9%2C like 1 [Source:ZFIN%3BAcc:ZDB-GENE-090915-3]	-	-	-	-	-
ENSDARG00000105391	6302	5	0.07	3	0.04	71	0.88	1	0.01	0	0	3	0.04	11.2505	-4.10477	1.56123	-2.6292	0.00855869	0.999779	Down	7	13918349	13984507	+	strc	stereocilin [Source:ZFIN%3BAcc:ZDB-GENE-160114-58]	-	-	-	-	-
ENSDARG00000028333	2079	3	0.12	5	0.22	20	0.75	1	0.04	0	0	0	0	4.34124	-4.63229	1.76775	-2.62044	0.00878163	0.999779	Down	7	17255705	17309337	+	nitr9	novel immune-type receptor 9 [Source:ZFIN%3BAcc:ZDB-GENE-041001-6]	-	-	-	-	-
ENSDARG00000093382	1058	246	19.59	186	16.19	314	23.23	70	5.63	136	9.95	129	10.65	172.591	-1.24086	0.475082	-2.61188	0.00900446	0.999779	Down	10	27006266	27009584	-	uqcc3	ubiquinol-cytochrome c reductase complex assembly factor 3 [Source:NCBI gene%3BAcc:558925]	GO:0006754:ATP biosynthetic process;GO:0042407:cristae formation;GO:0006122:mitochondrial electron transport, ubiquinol to cytochrome c;GO:0034551:mitochondrial respiratory chain complex III assembly;	GO:0031305:integral component of mitochondrial inner membrane;	GO:1901612:cardiolipin binding;GO:0070300:phosphatidic acid binding;	-	-
ENSDARG00000093317	1447	1	0.06	5	0.32	5	0.27	27	1.59	111	5.94	2	0.12	23.1753	3.51209	1.34967	2.60218	0.00926339	0.999779	Ups	23	18904674	18913072	-	si:ch211-209j10.6	si:ch211-209j10.6 [Source:ZFIN%3BAcc:ZDB-GENE-090311-44]	-	-	-	K12473	;ko04144 Endocytosis;ko04913 Ovarian steroidogenesis;ko04925 Aldosterone synthesis and secretion;ko04927 Cortisol synthesis and secretion;ko04934 Cushing syndrome;ko04976 Bile secretion;ko04979 Cholesterol metabolism;ko05145 Toxoplasmosis;ko05160 Hepatitis C;
ENSDARG00000075864	9534	74	0.65	52	0.5	35	0.29	149	1.33	122	0.99	396	3.63	130.594	1.87941	0.726279	2.58772	0.00966133	0.999779	Ups	10	19026988	19093808	+	igsf9a	immunoglobulin superfamily%2C member 9a [Source:ZFIN%3BAcc:ZDB-GENE-060503-288]	-	-	-	-	-
ENSDARG00000097613	7605	23	0.25	2121	25.68	2079	21.39	295	3.3	133	1.35	47	0.54	811.089	-3.1757	1.22916	-2.58362	0.00977683	0.999779	Down	6	46843592	46875310	-	igfn1.3	immunoglobulin like and fibronectin type III domain containing 1%2C tandem duplicate 3 [Source:ZFIN%3BAcc:ZDB-GENE-131122-44]	-	-	-	-	-
ENSDARG00000095493	809	33	3.44	3	0.34	0	0	0	0	0	0	0	0	6.0989	-6.13634	2.3774	-2.58112	0.00984812	0.999779	Down	22	4783644	4784658	-	CU570881.1	-	-	-	-	-	-
ENSDARG00000098803	1841	1	0.05	1	0.05	11	0.47	82	3.79	14	0.59	12	0.57	20.8141	3.34995	1.30133	2.57424	0.010046	0.999779	Ups	23	42362337	42372651	+	cyp2aa4	cytochrome P450%2C family 2%2C subfamily AA%2C polypeptide 4 [Source:ZFIN%3BAcc:ZDB-GENE-040625-72]	-	-	-	K17852	-
ENSDARG00000117599	1470	456	26.13	2522	157.96	2390	127.24	16051	929.63	36134	1902	613	36.41	9203.53	3.15582	1.22739	2.57115	0.0101361	0.999779	Ups	18	1270387	1280748	-	CABZ01068842.1	-	-	-	-	-	-
ENSDARG00000055723	2302	36	1.32	69	2.76	26	0.88	85	3.14	1406	47.26	17	0.64	244.777	3.19118	1.24267	2.568	0.0102288	0.999779	Ups	8	4798158	4800911	+	hsp70l	heat shock cognate 70-kd protein%2C like [Source:ZFIN%3BAcc:ZDB-GENE-050321-1]	-	GO:0005737:cytoplasm;GO:0005634:nucleus;	GO:0005524:ATP binding;	K03283	;ko03040 Spliceosome;ko04010 MAPK signaling pathway;ko04141 Protein processing in endoplasmic reticulum;ko04144 Endocytosis;ko04213 Longevity regulating pathway - multiple species;ko04612 Antigen processing and presentation;ko04915 Estrogen signaling pathway;ko05020 Prion disease;ko05134 Legionellosis;ko05145 Toxoplasmosis;ko05162 Measles;
ENSDARG00000078828	1344	0	0	1	0.07	0	0	12	0.76	10	0.58	3	0.19	4.32274	4.51453	1.75872	2.56693	0.0102602	0.999779	Ups	22	11535131	11537654	+	npb	neuropeptide B [Source:ZFIN%3BAcc:ZDB-GENE-040107-40]	-	-	-	K05267	;ko04080 Neuroactive ligand-receptor interaction;
ENSDARG00000019585	1516	6	0.33	807	49.01	367	18.95	69	3.88	3	0.15	45	2.59	242.498	-3.49406	1.363	-2.56352	0.0103618	0.999779	Down	16	30933044	31006689	+	gstk2	glutathione S-transferase kappa 2 [Source:ZFIN%3BAcc:ZDB-GENE-100922-14]	-	-	-	K13299	;ko00480 Glutathione metabolism;ko00980 Metabolism of xenobiotics by cytochrome P450;ko00982 Drug metabolism - cytochrome P450;ko01100 Metabolic pathways;ko04146 Peroxisome;ko05204 Chemical carcinogenesis;
ENSDARG00000097292	2403	9	0.32	34	1.3	11	0.36	2	0.07	0	0	4	0.15	11.2038	-3.42715	1.33714	-2.56305	0.0103758	0.999779	Down	8	26253252	26267110	+	slc26a6	solute carrier family 26 member 6 [Source:ZFIN%3BAcc:ZDB-GENE-081105-83]	GO:0038166:angiotensin-activated signaling pathway;GO:0015701:bicarbonate transport;GO:0071320:cellular response to cAMP;GO:0071332:cellular response to fructose stimulus;GO:0071346:cellular response to interferon-gamma;GO:0006821:chloride transport;GO:0042045:epithelial fluid transport;GO:0015724:formate transport;GO:0050892:intestinal absorption;GO:0051454:intracellular pH elevation;GO:0006811:…	GO:0016324:apical plasma membrane;GO:0016323:basolateral plasma membrane;GO:0031526:brush border membrane;GO:0034707:chloride channel complex;GO:0030659:cytoplasmic vesicle membrane;GO:0005783:endoplasmic reticulum;GO:0016021:integral component of membrane;GO:0005887:integral component of plasma membrane;GO:0016020:membrane;GO:0005886:plasma membrane;GO:0097225:sperm midpiece;GO:0031982:vesicle;G…	GO:0015301:anion:anion antiporter activity;GO:0015106:bicarbonate transmembrane transporter activity;GO:0005254:chloride channel activity;GO:0015108:chloride transmembrane transporter activity;GO:0015562:efflux transmembrane transporter activity;GO:0015660:formate efflux transmembrane transporter activity;GO:0015499:formate transmembrane transporter activity;GO:0019531:oxalate transmembrane trans…	-	-
ENSDARG00000026904	1146	1	0.07	2	0.16	9	0.61	128	9.51	1	0.07	16	1.22	28.0431	3.87727	1.51443	2.56021	0.0104609	0.999779	Ups	2	37874771	37878304	+	cbln13	cerebellin 13 [Source:ZFIN%3BAcc:ZDB-GENE-070912-288]	-	-	-	-	-
ENSDARG00000070073	2075	6	0.24	0	0	69	2.6	1	0.04	0	0	1	0.04	10.2199	-4.94714	1.93283	-2.55953	0.0104815	0.999779	Down	11	13507053	13517846	+	si:dkey-13m1.5	si:dkey-13m1.5 [Source:ZFIN%3BAcc:ZDB-GENE-120411-27]	-	-	-	-	-
ENSDARG00000071341	2439	7	0.24	490	18.5	61	1.96	17	0.59	30	0.95	0	0	122.39	-3.9415	1.5421	-2.55594	0.0105902	0.999779	Down	17	24537185	24564677	-	abch1	ATP-binding cassette%2C sub-family H%2C member 1 [Source:ZFIN%3BAcc:ZDB-GENE-050517-42]	-	-	-	-	-
ENSDARG00000094067	7731	47	0.51	3	0.04	0	0	0	0	0	0	1	0.01	8.55607	-5.63865	2.21029	-2.55109	0.0107388	0.999779	Down	15	41349268	41390410	-	si:dkey-121n8.7	si:dkey-121n8.7 [Source:ZFIN%3BAcc:ZDB-GENE-070912-366]	GO:0045765:regulation of angiogenesis;	GO:0032311:angiogenin-PRI complex;GO:0005829:cytosol;GO:0005654:nucleoplasm;	GO:0008428:ribonuclease inhibitor activity;	K12800	;ko04217 Necroptosis;ko04621 NOD-like receptor signaling pathway;ko04625 C-type lectin receptor signaling pathway;ko05130 Pathogenic Escherichia coli infection;ko05131 Shigellosis;ko05132 Salmonella infection;ko05133 Pertussis;ko05135 Yersinia infection;ko05164 Influenza A;ko05171 Coronavirus disease - COVID-19;
ENSDARG00000111386	555	6	0.91	45	7.47	39	5.5	345	52.92	415	57.86	11	1.73	141.259	2.99872	1.17743	2.54683	0.0108707	0.999779	Ups	22	278790	282498	-	CABZ01079178.1	-	-	GO:0030016:myofibril;GO:0032982:myosin filament;	GO:0051015:actin filament binding;GO:0005524:ATP binding;GO:0005516:calmodulin binding;GO:0003774:motor activity;	K10352	;ko04270 Vascular smooth muscle contraction;ko04530 Tight junction;ko04810 Regulation of actin cytoskeleton;ko05130 Pathogenic Escherichia coli infection;
ENSDARG00000104730	1044	1	0.08	39	3.44	8	0.6	2	0.16	0	0	0	0	9.99687	-4.7923	1.88311	-2.54489	0.0109314	0.999779	Down	8	36142734	36146191	+	si:dkey-33b17.3	si:dkey-33b17.3 [Source:ZFIN%3BAcc:ZDB-GENE-030616-171]	-	-	-	-	-
ENSDARG00000069478	4866	0	0	0	0	0	0	17	0.3	0	0	13	0.23	5.04643	5.77688	2.277	2.53706	0.0111789	0.999779	Ups	8	28667021	28695383	+	slc13a3	solute carrier family 13 member 3 [Source:ZFIN%3BAcc:ZDB-GENE-040426-2486]	GO:0015746:citrate transport;	GO:0070062:extracellular exosome;GO:0016021:integral component of membrane;GO:0005886:plasma membrane;	GO:0015137:citrate transmembrane transporter activity;GO:0015362:high-affinity sodium:dicarboxylate symporter activity;GO:0017153:sodium:dicarboxylate symporter activity;GO:0015141:succinate transmembrane transporter activity;	K14445	-
ENSDARG00000037603	1299	12	0.78	2	0.14	27	1.63	49	3.21	43	2.56	98	6.59	35.392	2.29731	0.906675	2.53378	0.011284	0.999779	Ups	14	8619126	8625845	-	zgc:162144	zgc:162144 [Source:ZFIN%3BAcc:ZDB-GENE-030131-7630]	-	-	-	-	-
ENSDARG00000100373	1015	2	0.17	39	3.54	12	0.93	3	0.25	1	0.08	1	0.09	11.1526	-3.63434	1.43522	-2.53225	0.0113333	0.999779	Down	3	8006777	8012847	-	si:ch211-175l6.1	si:ch211-175l6.1 [Source:ZFIN%3BAcc:ZDB-GENE-060503-861]	-	-	-	K12012	-
ENSDARG00000076819	4552	4	0.07	1	0.02	18	0.31	74	1.38	73	1.24	9	0.17	28.7774	2.96388	1.17225	2.52836	0.0114595	0.999779	Ups	15	41422248	41438821	-	nlrc8	NLR family CARD domain containing 8 [Source:ZFIN%3BAcc:ZDB-GENE-070912-363]	-	-	-	K12800	;ko04217 Necroptosis;ko04621 NOD-like receptor signaling pathway;ko04625 C-type lectin receptor signaling pathway;ko05130 Pathogenic Escherichia coli infection;ko05131 Shigellosis;ko05132 Salmonella infection;ko05133 Pertussis;ko05135 Yersinia infection;ko05164 Influenza A;ko05171 Coronavirus disease - COVID-19;
ENSDARG00000100844	2204	4	0.15	0	0	34	1.21	0	0	0	0	0	0	5.04518	-5.87335	2.32436	-2.52686	0.0115086	0.999779	Down	15	45563491	45590345	+	cldn15lb	claudin 15-like b [Source:ZFIN%3BAcc:ZDB-GENE-040718-145]	-	-	-	K06087	;ko04514 Cell adhesion molecules;ko04530 Tight junction;ko04670 Leukocyte transendothelial migration;ko05130 Pathogenic Escherichia coli infection;ko05160 Hepatitis C;
ENSDARG00000097726	3419	2	0.05	28	0.75	4	0.09	1	0.02	1	0.02	0	0	7.22689	-4.41216	1.74972	-2.52165	0.0116807	0.999779	Down	15	15173611	15218956	+	si:ch211-149e23.4	si:ch211-149e23.4 [Source:ZFIN%3BAcc:ZDB-GENE-131121-606]	-	-	-	-	-
ENSDARG00000056210	2020	29	1.21	8	0.36	47	1.82	22	0.93	426	16.32	82	3.54	89.8366	2.61287	1.03864	2.51568	0.0118805	0.999779	Ups	8	24968098	24970790	-	hspa1b	heat shock protein family A (Hsp70) member 1B [Source:ZFIN%3BAcc:ZDB-GENE-060503-867]	-	GO:0005737:cytoplasm;GO:0005634:nucleus;	GO:0005524:ATP binding;	K03283	;ko03040 Spliceosome;ko04010 MAPK signaling pathway;ko04141 Protein processing in endoplasmic reticulum;ko04144 Endocytosis;ko04213 Longevity regulating pathway - multiple species;ko04612 Antigen processing and presentation;ko04915 Estrogen signaling pathway;ko05020 Prion disease;ko05134 Legionellosis;ko05145 Toxoplasmosis;ko05162 Measles;
ENSDARG00000094480	701	3	0.36	28	3.68	2	0.22	0	0	1	0.11	1	0.12	7.0928	-4.48123	1.78298	-2.51334	0.0119594	0.999779	Down	2	10386479	10416272	+	BX927121.1	-	-	-	-	-	-
ENSDARG00000090461	5669	14	0.21	138	2.24	2	0.03	8	0.12	3	0.04	0	0	34.3124	-4.0934	1.63042	-2.51064	0.0120513	0.999779	Down	4	33720803	33763368	-	si:ch211-197f20.1	si:ch211-197f20.1 [Source:ZFIN%3BAcc:ZDB-GENE-081103-44]	-	-	-	K12800	;ko04217 Necroptosis;ko04621 NOD-like receptor signaling pathway;ko04625 C-type lectin receptor signaling pathway;ko05130 Pathogenic Escherichia coli infection;ko05131 Shigellosis;ko05132 Salmonella infection;ko05133 Pertussis;ko05135 Yersinia infection;ko05164 Influenza A;ko05171 Coronavirus disease - COVID-19;
ENSDARG00000102911	1963	3	0.13	367	17.21	30	1.2	19	0.82	21	0.83	8	0.36	91.3879	-3.43923	1.37447	-2.50223	0.0123413	0.999779	Down	11	41858807	41929506	+	iffo2b	intermediate filament family orphan 2b [Source:ZFIN%3BAcc:ZDB-GENE-121030-9]	-	GO:0005882:intermediate filament;	-	-	-
ENSDARG00000043584	1879	0	0	1	0.05	0	0	7	0.32	41	1.69	0	0	7.41777	5.33374	2.13368	2.49979	0.0124268	0.999779	Ups	17	23607195	23609210	-	ifit15	interferon-induced protein with tetratricopeptide repeats 15 [Source:ZFIN%3BAcc:ZDB-GENE-030131-1055]	-	-	-	-	-
ENSDARG00000112048	69	0	0	0	0	0	0	1	1.23	22	24.67	2	2.53	3.64089	5.31584	2.13456	2.49037	0.0127611	0.999779	Ups	4	50995331	50995399	+	BX855613.1	-	-	-	-	-	-
ENSDARG00000021572	1830	33	1.52	42	2.11	169	7.23	226	10.51	1768	74.76	13	0.62	334.634	3.03656	1.22034	2.48829	0.0128359	0.999779	Ups	13	27328098	27332360	+	cgas	cyclic GMP-AMP synthase [Source:ZFIN%3BAcc:ZDB-GENE-090313-23]	-	-	-	K17834	;ko04623 Cytosolic DNA-sensing pathway;ko05131 Shigellosis;ko05163 Human cytomegalovirus infection;ko05168 Herpes simplex virus 1 infection;ko05170 Human immunodeficiency virus 1 infection;ko05171 Coronavirus disease - COVID-19;
ENSDARG00000042737	3670	0	0	0	0	0	0	11	0.26	4	0.08	2	0.05	2.91249	4.97603	2.0008	2.48702	0.0128818	0.999779	Ups	8	28467893	28477739	+	slc52a3	solute carrier family 52 member 3 [Source:NCBI gene%3BAcc:678609]	-	GO:0005887:integral component of plasma membrane;	GO:0032217:riboflavin transporter activity;	K14620	;ko04977 Vitamin digestion and absorption;
ENSDARG00000043492	1439	87	5.09	46	2.94	107	5.82	148	8.76	338	18.17	171	10.38	139.043	1.40347	0.566089	2.47924	0.0131664	0.999779	Ups	13	311380	318827	+	irf1a	interferon regulatory factor 1a [Source:ZFIN%3BAcc:ZDB-GENE-060421-4031]	GO:0008283:cell proliferation;	GO:0005634:nucleus;	GO:0003700:sequence-specific DNA binding transcription factor activity;GO:0044212:transcription regulatory region DNA binding;	K10153	-
ENSDARG00000100506	4952	55	0.94	1	0.02	18	0.28	3	0.05	0	0	2	0.04	12.4696	-3.8155	1.53958	-2.47827	0.013202	0.999779	Down	22	23493170	23545828	-	crb1	crumbs cell polarity complex component 1 [Source:ZFIN%3BAcc:ZDB-GENE-050208-382]	-	-	-	K16681	;ko04390 Hippo signaling pathway;ko04391 Hippo signaling pathway - fly;
ENSDARG00000074094	3330	331	8.37	59	1.63	266	6.25	82	2.1	44	1.02	28	0.73	127.37	-1.99265	0.804909	-2.47563	0.0133002	0.999779	Down	6	2093206	2122486	+	tgm2b	transglutaminase 2b [Source:ZFIN%3BAcc:ZDB-GENE-030131-2576]	GO:0018149:peptide cross-linking;	GO:0005739:mitochondrion;	GO:0046872:metal ion binding;GO:0003810:protein-glutamine gamma-glutamyltransferase activity;	K05625	;ko05016 Huntington disease;
ENSDARG00000043480	2532	28	0.93	25	0.91	9	0.28	39	1.31	43	1.31	363	12.52	77.1907	2.56912	1.04306	2.46306	0.0137757	0.999779	Ups	24	36204028	36223943	+	rbbp8	retinoblastoma binding protein 8 [Source:NCBI gene%3BAcc:503536]	GO:0051301:cell division;GO:0010792:DNA double-strand break processing involved in repair via single-strand annealing;GO:0000724:double-strand break repair via homologous recombination;GO:0051321:meiotic cell cycle;GO:0006289:nucleotide-excision repair;	GO:0005634:nucleus;GO:0035861:site of double-strand break;	GO:0003684:damaged DNA binding;GO:0000406:double-strand/single-strand DNA junction binding;GO:0003690:double-stranded DNA binding;GO:0070336:flap-structured DNA binding;GO:0003697:single-stranded DNA binding;GO:0000014:single-stranded DNA endodeoxyribonuclease activity;GO:0000403:Y-form DNA binding;	-	-
ENSDARG00000074319	6858	11	0.14	12	0.16	15	0.17	21	0.26	85	0.96	55	0.7	30.4455	1.93553	0.786103	2.46218	0.0138094	0.999779	Ups	7	37359004	37392172	+	sall1a	spalt-like transcription factor 1a [Source:ZFIN%3BAcc:ZDB-GENE-020228-2]	GO:0030325:adrenal gland development;GO:0001658:branching involved in ureteric bud morphogenesis;GO:0048566:embryonic digestive tract development;GO:0042733:embryonic digit morphogenesis;GO:0008406:gonad development;GO:0007507:heart development;GO:0031129:inductive cell-cell signaling;GO:0001822:kidney development;GO:0072073:kidney epithelium development;GO:0060173:limb development;GO:0003337:mes…	GO:0010369:chromocenter;GO:0005737:cytoplasm;GO:0000792:heterochromatin;GO:0005654:nucleoplasm;GO:0005634:nucleus;	GO:0008013:beta-catenin binding;GO:0003677:DNA binding;GO:0003700:sequence-specific DNA binding transcription factor activity;GO:0000981:sequence-specific DNA binding RNA polymerase II transcription factor activity;GO:0001227:RNA polymerase II transcription regulatory region sequence-specific DNA binding transcription factor activity involved in negative regulation of transcription;GO:0046872:met…	-	-
ENSDARG00000016771	5009	36	0.61	16	0.29	69	1.08	90	1.53	122	1.88	137	2.39	72.4415	1.55491	0.633269	2.45537	0.0140739	0.999779	Ups	2	16780643	16794710	+	tfa	transferrin-a [Source:ZFIN%3BAcc:ZDB-GENE-980526-35]	GO:0006811:ion transport;GO:0055072:iron ion homeostasis;	GO:0005615:extracellular space;	GO:0046872:metal ion binding;	K14736	;ko04066 HIF-1 signaling pathway;ko04216 Ferroptosis;ko04978 Mineral absorption;
ENSDARG00000055395	1463	285	16.41	735	46.26	376	20.11	192	11.17	112	5.92	183	10.92	332.739	-1.69895	0.693882	-2.44846	0.0143467	0.999779	Down	20	26683933	26685395	+	foxq1b	forkhead box Q1b [Source:ZFIN%3BAcc:ZDB-GENE-040426-2090]	GO:0009653:anatomical structure morphogenesis;GO:0030154:cell differentiation;GO:0031069:hair follicle morphogenesis;GO:0043524:negative regulation of neuron apoptotic process;GO:0000122:negative regulation of transcription from RNA polymerase II promoter;GO:0006357:regulation of transcription from RNA polymerase II promoter;	GO:0005634:nucleus;	GO:0000981:sequence-specific DNA binding RNA polymerase II transcription factor activity;GO:0001227:RNA polymerase II transcription regulatory region sequence-specific DNA binding transcription factor activity involved in negative regulation of transcription;GO:0000978:RNA polymerase II core promoter proximal region sequence-specific DNA binding;	K09410	-
ENSDARG00000117254	2451	20	0.69	0	0	7	0.22	0	0	0	0	0	0	4.20609	-5.60487	2.29911	-2.43784	0.0147753	0.999779	Down	14	37166528	37418368	-	FP102806.1	-	-	-	-	-	-
ENSDARG00000117477	674	24	3	0	0	12	1.39	0	0	0	0	1	0.13	5.65634	-5.0341	2.06551	-2.43721	0.014801	0.999779	Down	11	8476961	8515378	-	CR847563.2	-	-	-	-	-	-
ENSDARG00000053005	1834	3	0.14	7	0.35	14	0.6	14	0.65	121	5.11	22	1.05	27.0132	2.6044	1.06929	2.43563	0.014866	0.999779	Ups	16	44906324	44917748	+	cd22	cd22 molecule [Source:ZFIN%3BAcc:ZDB-GENE-050522-521]	-	-	-	-	-
ENSDARG00000100265	1692	2	0.1	0	0	3	0.14	41	2.06	0	0	39	2.01	13.9952	4.15253	1.70581	2.43434	0.014919	0.999779	Ups	25	8581541	8602437	-	rhcgb	Rh family%2C C glycoprotein b [Source:NCBI gene%3BAcc:792274]	GO:0097272:ammonia homeostasis;GO:0072488:ammonium transmembrane transport;GO:0015696:ammonium transport;	GO:0016324:apical plasma membrane;GO:0016021:integral component of membrane;GO:0005887:integral component of plasma membrane;	GO:0008519:ammonium transmembrane transporter activity;	K06580	-
ENSDARG00000029747	2340	17	0.61	18	0.71	11	0.37	248	9.02	73	2.41	7	0.26	65.7926	2.8346	1.16536	2.43238	0.0149999	0.999779	Ups	20	35473288	35481584	+	mep1a.1	meprin A%2C alpha (PABA peptide hydrolase)%2C tandem duplicate 1 [Source:ZFIN%3BAcc:ZDB-GENE-041001-209]	-	GO:0070062:extracellular exosome;GO:0005615:extracellular space;GO:0005887:integral component of plasma membrane;GO:0017090:meprin A complex;	GO:0004222:metalloendopeptidase activity;GO:0008270:zinc ion binding;	-	-
ENSDARG00000100439	699	43	5.18	10	1.32	42	4.7	143	17.42	90	9.96	85	10.62	66.5514	1.81203	0.745091	2.43195	0.0150177	0.999779	Ups	20	12702923	12722351	+	FAM177A1	zgc:153383 [Source:ZFIN%3BAcc:ZDB-GENE-060825-178]	-	-	-	-	-
ENSDARG00000095528	2704	0	0	0	0	0	0	5	0.16	9	0.26	2	0.06	2.51507	4.77485	1.9688	2.42526	0.0152976	0.999779	Ups	15	41400520	41408148	-	CR854897.1	NLR family CARD domain-containing protein 3-like [Source:NCBI gene%3BAcc:108179100]	-	-	-	K12800	;ko04217 Necroptosis;ko04621 NOD-like receptor signaling pathway;ko04625 C-type lectin receptor signaling pathway;ko05130 Pathogenic Escherichia coli infection;ko05131 Shigellosis;ko05132 Salmonella infection;ko05133 Pertussis;ko05135 Yersinia infection;ko05164 Influenza A;ko05171 Coronavirus disease - COVID-19;
ENSDARG00000086452	2965	44	1.25	39	1.21	9	0.24	7	0.2	2	0.05	8	0.24	19.6048	-2.62055	1.08146	-2.42315	0.0153864	0.999779	Down	7	50796422	50818874	+	dthd1	death domain containing 1 [Source:ZFIN%3BAcc:ZDB-GENE-140106-180]	-	-	-	-	-
ENSDARG00000103564	1568	0	0	0	0	2	0.1	10	0.54	19	0.94	3	0.17	5.28715	4.07146	1.68595	2.41493	0.0157382	0.999779	Ups	3	8825382	8836722	+	si:dkeyp-30d6.2	si:dkeyp-30d6.2 [Source:ZFIN%3BAcc:ZDB-GENE-141222-83]	GO:0071346:cellular response to interferon-gamma;GO:0042742:defense response to bacterium;GO:0006955:immune response;GO:0044406:adhesion of symbiont to host;GO:0035458:cellular response to interferon-beta;GO:0071222:cellular response to lipopolysaccharide;GO:0050830:defense response to Gram-positive bacterium;GO:0042832:defense response to protozoan;GO:0034504:protein localization to nucleus;GO:0…	GO:0015629:actin cytoskeleton;GO:0005737:cytoplasm;GO:0031410:cytoplasmic vesicle;GO:0005829:cytosol;GO:0005794:Golgi apparatus;GO:0000139:Golgi membrane;GO:0005654:nucleoplasm;GO:0005634:nucleus;GO:0048471:perinuclear region of cytoplasm;GO:0020005:symbiont-containing vacuole membrane;	GO:0005525:GTP binding;GO:0003924:GTPase activity;GO:0042803:protein homodimerization activity;	-	-
ENSDARG00000075932	1592	7	0.37	326	18.85	40	1.97	21	1.12	0	0	14	0.77	82.6978	-3.69733	1.53416	-2.41001	0.0159521	0.999779	Down	8	44475793	44480456	+	si:ch73-211l2.3	si:ch73-211l2.3 [Source:ZFIN%3BAcc:ZDB-GENE-081105-52]	-	-	-	K06752	;ko04145 Phagosome;ko04514 Cell adhesion molecules;ko04612 Antigen processing and presentation;ko04640 Hematopoietic cell lineage;ko04658 Th1 and Th2 cell differentiation;ko04659 Th17 cell differentiation;ko04672 Intestinal immune network for IgA production;ko04940 Type I diabetes mellitus;ko05140 Leishmaniasis;ko05145 Toxoplasmosis;ko05150 Staphylococcus aureus infection;ko05152 Tuberculosis;ko0…
ENSDARG00000023759	2300	12	0.44	12	0.48	34	1.16	101	3.74	111	3.73	24	0.91	47.2035	2.08552	0.868045	2.40255	0.0162811	0.999779	Ups	5	6350328	6377865	-	zgc:73226	zgc:73226 [Source:NCBI gene%3BAcc:402792]	-	-	-	K15464	;ko04068 FoxO signaling pathway;ko04137 Mitophagy - animal;ko04140 Autophagy - animal;ko05131 Shigellosis;ko05134 Legionellosis;
ENSDARG00000103826	1908	115	5.08	53	2.56	18	0.74	830	37.04	200	8.11	66	3.02	225.587	2.55797	1.06479	2.40233	0.0162909	0.999779	Ups	18	402048	423921	+	gpib	glucose-6-phosphate isomerase b [Source:ZFIN%3BAcc:ZDB-GENE-020513-3]	GO:0061621:canonical glycolysis;GO:0005975:carbohydrate metabolic process;GO:0006094:gluconeogenesis;GO:0051156:glucose 6-phosphate metabolic process;GO:0006096:glycolytic process;GO:0007599:hemostasis;GO:0006959:humoral immune response;GO:0043312:neutrophil degranulation;GO:0010595:positive regulation of endothelial cell migration;GO:0051024:positive regulation of immunoglobulin secretion;	GO:0005829:cytosol;GO:0070062:extracellular exosome;GO:0005576:extracellular region;GO:0016020:membrane;GO:0005654:nucleoplasm;GO:0005886:plasma membrane;GO:0034774:secretory granule lumen;	GO:0005125:cytokine activity;GO:0004347:glucose-6-phosphate isomerase activity;GO:0008083:growth factor activity;GO:0016866:intramolecular transferase activity;GO:0048029:monosaccharide binding;GO:0031625:ubiquitin protein ligase binding;	K01810	;ko00010 Glycolysis / Gluconeogenesis;ko00030 Pentose phosphate pathway;ko00500 Starch and sucrose metabolism;ko00520 Amino sugar and nucleotide sugar metabolism;ko01100 Metabolic pathways;ko01110 Biosynthesis of secondary metabolites;ko01120 Microbial metabolism in diverse environments;ko01200 Carbon metabolism;
ENSDARG00000086498	2482	0	0	46	1.71	0	0	0	0	0	0	0	0	9.94047	-6.8371	2.84605	-2.40231	0.0162917	0.999779	Down	15	14141045	14147349	+	si:ch211-116o3.3	si:ch211-116o3.3 [Source:ZFIN%3BAcc:ZDB-GENE-131121-462]	-	-	-	K05030	;ko04924 Renin secretion;ko04972 Pancreatic secretion;
ENSDARG00000104263	1320	58	3.7	2	0.14	15	0.89	4	0.26	0	0	2	0.13	12.9805	-3.57072	1.48816	-2.39942	0.0164212	0.999779	Down	24	36581016	36593876	-	CABZ01055365.1	-	GO:0051014:actin filament severing;GO:0009987:cellular process;GO:0030866:cortical actin cytoskeleton organization;GO:0008360:regulation of cell shape;GO:0006929:substrate-dependent cell migration;	GO:0005829:cytosol;GO:0045335:phagocytic vesicle;GO:0005886:plasma membrane;	GO:0051015:actin filament binding;GO:0032794:GTPase activating protein binding;GO:0005522:profilin binding;GO:0048365:Rac GTPase binding;	-	-
ENSDARG00000116893	2356	10	0.36	1	0.04	165	5.48	3	0.11	0	0	7	0.26	24.7174	-3.88579	1.61998	-2.39866	0.0164551	0.999779	Down	3	2070039	2072630	-	BX005442.4	-	-	-	-	K12473	;ko04144 Endocytosis;ko04913 Ovarian steroidogenesis;ko04925 Aldosterone synthesis and secretion;ko04927 Cortisol synthesis and secretion;ko04934 Cushing syndrome;ko04976 Bile secretion;ko04979 Cholesterol metabolism;ko05145 Toxoplasmosis;ko05160 Hepatitis C;
ENSDARG00000112052	5856	0	0	1	0.02	1	0.01	19	0.28	27	0.36	0	0	7.76608	4.47173	1.87146	2.38943	0.0168746	0.999779	Ups	1	28594809	28607353	-	FO907124.1	uncharacterized LOC108185504 [Source:NCBI gene%3BAcc:108185504]	-	-	-	-	-
ENSDARG00000070852	1979	0	0	34	1.58	7	0.28	1	0.04	0	0	1	0.04	8.58091	-4.66754	1.95424	-2.38841	0.0169213	0.999779	Down	7	3802249	3807740	-	zgc:195077	zgc:195077 [Source:ZFIN%3BAcc:ZDB-GENE-080724-9]	-	-	-	-	-
ENSDARG00000101930	894	8	0.75	3	0.31	7	0.61	30	2.86	121	10.47	2	0.2	26.1544	3.01406	1.26226	2.38783	0.0169483	0.999779	Ups	12	43692048	43693192	-	CU914622.1	-	-	-	-	-	-
ENSDARG00000117544	1188	0	0	0	0	0	0	0	0	0	0	68	5	9.84545	6.74612	2.82761	2.3858	0.017042	0.999779	Ups	22	15787981	15811122	+	BX323550.5	-	-	-	-	-	-
ENSDARG00000116302	918	2	0.18	3	0.3	0	0	22	2.04	43	3.62	2	0.19	11.5496	3.50767	1.47518	2.3778	0.0174163	0.999779	Ups	5	7564644	7569302	+	ANGPTL2	angiopoietin like 2 [Source:HGNC Symbol%3BAcc:HGNC:490]	GO:0007275:multicellular organismal development;	GO:0070062:extracellular exosome;GO:0005615:extracellular space;	GO:0005102:receptor binding;	-	-
ENSDARG00000057365	1610	190	9.94	2	0.11	39	1.9	6	0.32	4	0.19	18	0.98	41.1422	-3.09822	1.30633	-2.3717	0.0177064	0.999779	Down	8	18200331	18203342	-	elovl8b	ELOVL fatty acid elongase 8b [Source:ZFIN%3BAcc:ZDB-GENE-050522-453]	GO:0034625:fatty acid elongation, monounsaturated fatty acid;GO:0034626:fatty acid elongation, polyunsaturated fatty acid;GO:0019367:fatty acid elongation, saturated fatty acid;GO:0035338:long-chain fatty-acyl-CoA biosynthetic process;GO:0030148:sphingolipid biosynthetic process;GO:0006636:unsaturated fatty acid biosynthetic process;GO:0042761:very long-chain fatty acid biosynthetic process;GO:00…	GO:0005783:endoplasmic reticulum;GO:0005789:endoplasmic reticulum membrane;GO:0030176:integral component of endoplasmic reticulum membrane;	GO:0009922:fatty acid elongase activity;GO:0008020:G-protein coupled photoreceptor activity;	K10249	;ko00062 Fatty acid elongation;ko01040 Biosynthesis of unsaturated fatty acids;ko01100 Metabolic pathways;ko01110 Biosynthesis of secondary metabolites;ko01212 Fatty acid metabolism;
ENSDARG00000117011	1311	11	0.71	43	3.02	18	1.07	4	0.26	5	0.3	7	0.47	15.9076	-2.42439	1.02297	-2.36995	0.0177906	0.999779	Down	13	159504	178764	+	ewsr1b	EWS RNA-binding protein 1b [Source:ZFIN%3BAcc:ZDB-GENE-030131-1600]	GO:0006355:regulation of transcription, DNA-templated;	GO:0005737:cytoplasm;GO:0005730:nucleolus;GO:0005634:nucleus;GO:0005886:plasma membrane;	GO:0005516:calmodulin binding;GO:0042802:identical protein binding;GO:0046872:metal ion binding;GO:0003723:RNA binding;	-	-
ENSDARG00000051762	1134	14	1.04	35	2.84	200	13.8	207	15.54	1615	110.2	22	1.69	309.735	2.93979	1.24213	2.36674	0.0179455	0.999779	Ups	25	34662358	34670413	-	CABZ01080568.1	-	GO:0010596:negative regulation of endothelial cell migration;GO:0090084:negative regulation of inclusion body assembly;GO:0010628:positive regulation of gene expression;GO:0042026:protein refolding;GO:0009408:response to heat;	GO:0005829:cytosol;GO:0016020:membrane;	GO:0005524:ATP binding;GO:0051087:chaperone binding;GO:0031072:heat shock protein binding;GO:0046872:metal ion binding;GO:0051082:unfolded protein binding;	-	-
ENSDARG00000058731	4613	30	0.55	38	0.76	32	0.54	87	1.61	749	12.56	7	0.13	142.261	2.85606	1.20717	2.36592	0.0179854	0.999779	Ups	8	12854105	12867434	-	slc2a6	solute carrier family 2 member 6 [Source:ZFIN%3BAcc:ZDB-GENE-081104-301]	GO:0008645:hexose transport;	GO:0005887:integral component of plasma membrane;GO:0016020:membrane;GO:0005886:plasma membrane;	GO:0005351:sugar:proton symporter activity;GO:0005355:glucose transmembrane transporter activity;	K08144	-
ENSDARG00000092242	1032	1	0.08	1	0.09	4	0.3	8	0.66	63	4.72	1	0.08	11.5949	3.54406	1.49821	2.36553	0.0180045	0.999779	Ups	1	11595798	11596829	-	CHST12	si:dkey-26i13.7 [Source:ZFIN%3BAcc:ZDB-GENE-090312-214]	GO:0016051:carbohydrate biosynthetic process;GO:0030206:chondroitin sulfate biosynthetic process;GO:0030208:dermatan sulfate biosynthetic process;GO:0030166:proteoglycan biosynthetic process;	GO:0000139:Golgi membrane;GO:0016021:integral component of membrane;	GO:0047756:chondroitin 4-sulfotransferase activity;GO:0008146:sulfotransferase activity;	-	-
ENSDARG00000100961	3445	0	0	0	0	0	0	10	0.25	15	0.34	0	0	4.01939	5.4505	2.30422	2.36545	0.0180084	0.999779	Ups	4	35851089	35989274	-	zgc:174653	zgc:174653 [Source:ZFIN%3BAcc:ZDB-GENE-080218-2]	-	GO:0005634:nucleus;	GO:0003677:DNA binding;GO:0046872:metal ion binding;	K09228	;ko05168 Herpes simplex virus 1 infection;
ENSDARG00000117430	2377	3	0.11	2	0.08	10	0.33	0	0	0	0	0	0	2.21726	-4.69244	1.99185	-2.35581	0.0184822	0.999779	Down	9	9355372	9370866	-	AL954142.4	-	-	-	-	-	-
ENSDARG00000105113	5000	0	0	0	0	0	0	3	0.05	5	0.08	6	0.1	2.14647	4.55076	1.93451	2.35241	0.0186523	0.999779	Ups	3	43460696	43479049	+	galr2b	galanin receptor 2b [Source:ZFIN%3BAcc:ZDB-GENE-131121-48]	GO:0007218:neuropeptide signaling pathway;	GO:0005887:integral component of plasma membrane;	GO:0008528:G-protein coupled peptide receptor activity;GO:0004966:galanin receptor activity;	K04231	;ko04080 Neuroactive ligand-receptor interaction;
ENSDARG00000027638	2067	1	0.04	0	0	0	0	0	0	1	0.04	52	2.2	7.83792	5.42603	2.31117	2.34774	0.0188875	0.999779	Ups	10	18999841	19011934	-	adra1ab	adrenoceptor alpha 1Ab [Source:ZFIN%3BAcc:ZDB-GENE-060503-384]	GO:0071880:adenylate cyclase-activating adrenergic receptor signaling pathway;GO:0007188:adenylate cyclase-modulating G-protein coupled receptor signaling pathway;GO:0001994:norepinephrine-epinephrine vasoconstriction involved in regulation of systemic arterial blood pressure;GO:0007200:phospholipase C-activating G-protein coupled receptor signaling pathway;GO:0007204:positive regulation of cytos…	GO:0005887:integral component of plasma membrane;	GO:0004935:adrenergic receptor activity;GO:0004937:alpha1-adrenergic receptor activity;	K04135	;ko04020 Calcium signaling pathway;ko04022 cGMP-PKG signaling pathway;ko04080 Neuroactive ligand-receptor interaction;ko04152 AMPK signaling pathway;ko04261 Adrenergic signaling in cardiomyocytes;ko04270 Vascular smooth muscle contraction;ko04970 Salivary secretion;
ENSDARG00000099511	3146	8	0.21	11	0.32	17	0.42	52	1.41	143	3.52	9	0.25	37.4463	2.42351	1.03395	2.34393	0.0190817	0.999779	Ups	22	7971101	8074212	-	CABZ01034698.2	-	-	-	-	-	-
ENSDARG00000058498	3816	3	0.07	0	0	4	0.08	44	0.98	5	0.1	9	0.21	11.2235	3.27285	1.39947	2.33864	0.0193543	0.999779	Ups	19	10692166	10730488	-	slc9a3.1	solute carrier family 9 member A3%2C tandem duplicate 1 [Source:ZFIN%3BAcc:ZDB-GENE-060503-545]	-	-	-	K12040	;ko04964 Proximal tubule bicarbonate reclamation;ko04974 Protein digestion and absorption;ko04976 Bile secretion;ko04978 Mineral absorption;
ENSDARG00000090352	3977	577	12.22	342	7.92	718	14.13	1426	30.53	6772	131.76	273	5.99	1541.05	2.28872	0.978822	2.33824	0.0193749	0.999779	Ups	16	31623975	31628687	-	CR855311.1	uncharacterized LOC101883708 [Source:NCBI gene%3BAcc:101883708]	-	-	-	-	-
ENSDARG00000102003	2873	6	0.18	23	0.74	5	0.14	0	0	0	0	3	0.09	7.04039	-3.86377	1.65254	-2.33808	0.0193832	0.999779	Down	19	47502581	47523302	+	CU695215.3	formin-like [Source:NCBI gene%3BAcc:103909278]	GO:0045010:actin nucleation;GO:0007275:multicellular organismal development;GO:0051127:positive regulation of actin nucleation;	GO:0005884:actin filament;GO:0005737:cytoplasm;GO:0005789:endoplasmic reticulum membrane;GO:0005634:nucleus;	GO:0003779:actin binding;GO:0008017:microtubule binding;	K10367	-
ENSDARG00000101102	2445	32	1.1	62	2.33	14	0.45	4	0.14	12	0.38	11	0.39	24.5525	-2.31728	0.9931	-2.33338	0.0196282	0.999779	Down	5	54501105	54542062	+	tprn	taperin [Source:ZFIN%3BAcc:ZDB-GENE-081104-254]	-	-	-	-	-
ENSDARG00000088825	4749	6	0.11	7	0.14	13	0.21	82	1.47	54	0.88	6	0.11	28.0806	2.51119	1.07806	2.32935	0.0198403	0.999779	Ups	8	3820134	3923378	+	citb	citron rho-interacting serine/threonine kinase b [Source:ZFIN%3BAcc:ZDB-GENE-131030-2]	GO:0031032:actomyosin structure organization;GO:0030866:cortical actin cytoskeleton organization;GO:0016358:dendrite development;GO:0000086:G2/M transition of mitotic cell cycle;GO:0048699:generation of neurons;GO:0007030:Golgi organization;GO:0035556:intracellular signal transduction;GO:0007091:metaphase/anaphase transition of mitotic cell cycle;GO:0000278:mitotic cell cycle;GO:0000281:mitotic c…	GO:0015629:actin cytoskeleton;GO:0032154:cleavage furrow;GO:0005737:cytoplasm;GO:0005856:cytoskeleton;GO:0005829:cytosol;GO:0031985:Golgi cisterna;GO:0030496:midbody;GO:0043025:neuronal cell body;GO:0005634:nucleus;GO:0005886:plasma membrane;GO:0001726:ruffle;GO:0005773:vacuole;	GO:0005524:ATP binding;GO:0046872:metal ion binding;GO:0030165:PDZ domain binding;GO:0004674:protein serine/threonine kinase activity;GO:0097110:scaffold protein binding;GO:0017124:SH3 domain binding;	K16308	-
ENSDARG00000077862	1509	12	0.67	66	4.03	3	0.16	4	0.23	5	0.26	0	0	18.0952	-3.51105	1.50901	-2.32672	0.0199801	0.999779	Down	22	30446987	30457736	+	si:dkey-169i5.4	si:dkey-169i5.4 [Source:ZFIN%3BAcc:ZDB-GENE-030131-8695]	-	-	-	-	-
ENSDARG00000091574	3603	6	0.14	92	2.35	44	0.96	195	4.61	520	11.17	145	3.51	158.649	2.32095	0.998658	2.32407	0.0201219	0.999779	Ups	11	3345405	3366782	-	suox	sulfite oxidase [Source:ZFIN%3BAcc:ZDB-GENE-070718-3]	GO:0042128:nitrate assimilation;GO:0006790:sulfur compound metabolic process;	GO:0005758:mitochondrial intermembrane space;GO:0005739:mitochondrion;	GO:0020037:heme binding;GO:0030151:molybdenum ion binding;GO:0043546:molybdopterin cofactor binding;GO:0008482:sulfite oxidase activity;	K00387	;ko00920 Sulfur metabolism;ko01100 Metabolic pathways;ko01120 Microbial metabolism in diverse environments;
ENSDARG00000053493	3734	14	0.32	6	0.15	31	0.65	42	0.96	47	0.97	83	1.94	34.2033	1.78774	0.770628	2.31986	0.0203487	0.999779	Ups	7	30326184	30367650	-	aldh1a2	aldehyde dehydrogenase 1 family%2C member A2 [Source:ZFIN%3BAcc:ZDB-GENE-011010-3]	GO:0042904:9-cis-retinoic acid biosynthetic process;GO:0001568:blood vessel development;GO:0048738:cardiac muscle tissue development;GO:0071300:cellular response to retinoic acid;GO:0009855:determination of bilateral symmetry;GO:0031076:embryonic camera-type eye development;GO:0048566:embryonic digestive tract development;GO:0035115:embryonic forelimb morphogenesis;GO:0060324:face development;GO:…	GO:0005737:cytoplasm;GO:0005829:cytosol;GO:0048471:perinuclear region of cytoplasm;	GO:0004028:3-chloroallyl aldehyde dehydrogenase activity;GO:0004029:aldehyde dehydrogenase (NAD) activity;GO:0016918:retinal binding;GO:0001758:retinal dehydrogenase activity;	K07249	;ko00830 Retinol metabolism;ko01100 Metabolic pathways;
ENSDARG00000061081	2836	393	11.67	191	6.2	964	26.6	785	23.57	2415	65.89	1188	36.58	896.07	1.52901	0.659562	2.31822	0.0204371	0.999779	Ups	19	42886413	42917226	+	arpp21	cAMP-regulated phosphoprotein%2C 21 [Source:ZFIN%3BAcc:ZDB-GENE-081104-296]	-	GO:0005634:nucleus;	GO:0003676:nucleic acid binding;	-	-
ENSDARG00000068865	2244	53	1.99	41	1.68	93	3.24	393	14.91	152	5.24	79	3.07	136.063	1.84357	0.799196	2.30678	0.021067	0.999779	Ups	4	77657660	77669219	+	si:dkey-61p9.7	si:dkey-61p9.7 [Source:ZFIN%3BAcc:ZDB-GENE-041210-241]	-	-	-	-	-
ENSDARG00000054454	4952	14	0.24	14	0.26	14	0.22	29	0.5	11	0.17	243	4.29	49.3065	2.56728	1.113	2.30664	0.0210751	0.999779	Ups	2	40067808	40136024	-	epha4a	eph receptor A4a [Source:NCBI gene%3BAcc:64271]	GO:0007155:cell adhesion;GO:0007399:nervous system development;GO:0043087:regulation of GTPase activity;GO:0007628:adult walking behavior;GO:0007411:axon guidance;GO:0021957:corticospinal tract morphogenesis;GO:0097156:fasciculation of motor neuron axon;GO:0097155:fasciculation of sensory neuron axon;GO:0008045:motor neuron axon guidance;GO:0048681:negative regulation of axon regeneration;GO:1900…	GO:0031901:early endosome membrane;GO:0005887:integral component of plasma membrane;GO:0030424:axon;GO:0005737:cytoplasm;GO:0043197:dendritic spine;GO:0043005:neuron projection;GO:0005886:plasma membrane;GO:0043235:receptor complex;	GO:0005524:ATP binding;GO:0005004:GPI-linked ephrin receptor activity;GO:0005005:transmembrane-ephrin receptor activity;GO:0097161:DH domain binding;GO:0042802:identical protein binding;GO:0042731:PH domain binding;GO:0004672:protein kinase activity;GO:0004714:transmembrane receptor protein tyrosine kinase activity;	K05105	;ko04360 Axon guidance;
ENSDARG00000090344	606	6	0.83	4	0.61	21	2.71	20	2.81	291	37.16	1	0.14	50.2977	3.31554	1.43742	2.30659	0.0210779	0.999779	Ups	11	21096339	21099783	+	il19l	interleukin 19 like [Source:ZFIN%3BAcc:ZDB-GENE-071121-1]	-	-	-	K05444	;ko04060 Cytokine-cytokine receptor interaction;ko04061 Viral protein interaction with cytokine and cytokine receptor;ko04630 JAK-STAT signaling pathway;
ENSDARG00000080675	5927	9	0.13	111	1.72	2	0.03	2	0.03	10	0.13	0	0	27.5422	-3.81842	1.65572	-2.3062	0.0210992	0.999779	Down	16	21946091	22006996	-	si:dkey-71b5.7	si:dkey-71b5.7 [Source:ZFIN%3BAcc:ZDB-GENE-100922-124]	-	-	-	-	-
ENSDARG00000089331	1360	53	3.28	0	0	63	3.63	3	0.19	1	0.06	6	0.39	18.4492	-3.4311	1.48869	-2.30478	0.0211788	0.999779	Down	25	37187952	37191929	-	urahb	urate (5-hydroxyiso-) hydrolase b [Source:ZFIN%3BAcc:ZDB-GENE-161215-1]	GO:0006144:purine nucleobase metabolic process;GO:0019628:urate catabolic process;	GO:0005777:peroxisome;	GO:0016811:hydrolase activity, acting on carbon-nitrogen (but not peptide) bonds, in linear amides;GO:0033971:hydroxyisourate hydrolase activity;	K07127	;ko00230 Purine metabolism;ko01100 Metabolic pathways;ko01120 Microbial metabolism in diverse environments;
ENSDARG00000027609	5510	1	0.02	2	0.03	2	0.03	16	0.25	26	0.37	2	0.03	7.86361	3.06354	1.32935	2.30454	0.0211921	0.999779	Ups	16	45249055	45288599	-	hpn	hepsin [Source:ZFIN%3BAcc:ZDB-GENE-141212-373]	GO:0034769:basement membrane disassembly;GO:0090103:cochlea morphogenesis;GO:0050910:detection of mechanical stimulus involved in sensory perception of sound;GO:0048012:hepatocyte growth factor receptor signaling pathway;GO:0043066:negative regulation of apoptotic process;GO:0050680:negative regulation of epithelial cell proliferation;GO:0010719:negative regulation of epithelial to mesenchymal tr…	GO:0016324:apical plasma membrane;GO:0009986:cell surface;GO:0005911:cell-cell junction;GO:0005789:endoplasmic reticulum membrane;GO:0070062:extracellular exosome;GO:0016021:integral component of membrane;GO:0005887:integral component of plasma membrane;GO:0043025:neuronal cell body;GO:0005886:plasma membrane;	GO:0015269:calcium-activated potassium channel activity;GO:0008233:peptidase activity;GO:0004252:serine-type endopeptidase activity;GO:0070008:serine-type exopeptidase activity;GO:0008236:serine-type peptidase activity;	K08665	;ko05203 Viral carcinogenesis;
ENSDARG00000059763	1737	1	0.05	1	0.05	0	0	1	0.05	2	0.09	44	2.21	7.22573	4.26641	1.85174	2.304	0.0212225	0.999779	Ups	8	53185079	53198154	-	gabrd	gamma-aminobutyric acid (GABA) A receptor%2C delta [Source:ZFIN%3BAcc:ZDB-GENE-081105-170]	GO:0007268:synaptic transmission;GO:0034220:ion transmembrane transport;GO:0050877:neurological system process;GO:0042391:regulation of membrane potential;GO:0007165:signal transduction;	GO:0030054:cell junction;GO:0034707:chloride channel complex;GO:1902711:GABA-A receptor complex;GO:0005887:integral component of plasma membrane;GO:0043005:neuron projection;GO:0045202:synapse;	GO:0005254:chloride channel activity;GO:0004890:GABA-A receptor activity;	K05184	;ko04080 Neuroactive ligand-receptor interaction;ko04723 Retrograde endocannabinoid signaling;ko04727 GABAergic synapse;ko05032 Morphine addiction;ko05033 Nicotine addiction;
ENSDARG00000095522	1174	8	0.57	11	0.86	0	0	0	0	0	0	0	0	3.69843	-5.40402	2.34567	-2.30383	0.0212321	0.999779	Down	16	22015648	22022456	-	si:dkey-71b5.3	si:dkey-71b5.3 [Source:ZFIN%3BAcc:ZDB-GENE-100922-91]	-	-	-	-	-
ENSDARG00000097429	886	8	0.76	6	0.62	25	2.21	3	0.29	0	0	1	0.1	6.54502	-3.13929	1.36286	-2.30346	0.0212533	0.999779	Down	24	961874	962759	-	BX005461.3	-	-	-	-	-	-
ENSDARG00000103615	1070	0	0	0	0	0	0	4	0.32	4	0.29	5	0.41	2.04394	4.47531	1.94419	2.30188	0.0213417	0.999779	Ups	14	33195619	33218418	-	si:dkey-31j3.11	si:dkey-31j3.11 [Source:ZFIN%3BAcc:ZDB-GENE-141216-100]	-	-	-	-	-
ENSDARG00000071384	6838	6	0.07	4	0.05	17	0.19	18	0.22	221	2.5	2	0.03	39.4834	3.12055	1.35629	2.3008	0.0214032	0.999779	Ups	14	41887070	41924901	+	slc7a11	solute carrier family 7 member 11 [Source:ZFIN%3BAcc:ZDB-GENE-150416-1]	GO:0030534:adult behavior;GO:0006865:amino acid transport;GO:0034599:cellular response to oxidative stress;GO:0090461:glutamate homeostasis;GO:0006749:glutathione metabolic process;GO:0034775:glutathione transmembrane transport;GO:0098712:L-glutamate import across plasma membrane;GO:0070306:lens fiber cell differentiation;GO:0050900:leukocyte migration;GO:0060173:limb development;GO:0048286:lung …	GO:0097449:astrocyte projection;GO:0031526:brush border membrane;GO:0009986:cell surface;GO:0005856:cytoskeleton;GO:0016021:integral component of membrane;GO:0005886:plasma membrane;GO:0005791:rough endoplasmic reticulum;	GO:0015327:cystine:glutamate antiporter activity;GO:0015179:L-amino acid transmembrane transporter activity;	K13869	;ko04216 Ferroptosis;
ENSDARG00000097977	938	23	2.07	0	0	25	2.09	0	0	0	0	2	0.19	7.31238	-4.55535	1.98214	-2.2982	0.0215506	0.999779	Down	17	25893485	25897760	-	BX000364.1	-	-	-	-	-	-
ENSDARG00000101589	802	18	1.89	0	0	5	0.49	0	0	0	0	0	0	3.61784	-5.38743	2.34541	-2.29701	0.0216179	0.999779	Down	8	53464216	53465017	+	cacna1db	calcium channel%2C voltage-dependent%2C L type%2C alpha 1D subunit%2C b [Source:ZFIN%3BAcc:ZDB-GENE-040525-3]	GO:0007188:adenylate cyclase-modulating G-protein coupled receptor signaling pathway;GO:0070509:calcium ion import;GO:0006816:calcium ion transport;GO:0086002:cardiac muscle cell action potential involved in contraction;GO:0045762:positive regulation of adenylate cyclase activity;GO:0051928:positive regulation of calcium ion transport;GO:0060372:regulation of atrial cardiac muscle cell membrane r…	GO:1990454:L-type voltage-gated calcium channel complex;GO:0030018:Z disc;	GO:0051393:alpha-actinin binding;GO:0030506:ankyrin binding;GO:0008331:high voltage-gated calcium channel activity;GO:0046872:metal ion binding;GO:0005245:voltage-gated calcium channel activity;GO:0086059:voltage-gated calcium channel activity involved SA node cell action potential;	-	-
ENSDARG00000097241	608	16	2.22	0	0	14	1.8	0	0	0	0	1	0.14	4.59289	-4.72821	2.06006	-2.29517	0.0217231	0.999779	Down	2	5726629	5729176	+	BX120016.1	-	-	-	-	-	-
ENSDARG00000070427	995	103	8.72	129	11.94	192	15.1	187	16	803	62.45	308	27.03	264.578	1.48581	0.648262	2.29198	0.0219066	0.999779	Ups	16	28754403	28760006	+	s100v1	S100 calcium binding protein V1 [Source:ZFIN%3BAcc:ZDB-GENE-080407-1]	-	-	-	-	-
ENSDARG00000090167	780	0	0	0	0	0	0	4	0.44	1	0.1	11	1.23	2.48104	4.75728	2.07811	2.28923	0.0220658	0.999779	Ups	22	6829466	6849585	-	FO904898.1	-	-	-	-	-	-
ENSDARG00000099515	2207	73	2.79	6	0.25	19	0.67	2	0.08	1	0.04	11	0.44	17.9129	-2.89746	1.26574	-2.28914	0.0220715	0.999779	Down	6	24329275	24358732	-	ephx4	epoxide hydrolase 4 [Source:ZFIN%3BAcc:ZDB-GENE-080227-1]	-	GO:0016021:integral component of membrane;	GO:0016787:hydrolase activity;	-	-
ENSDARG00000009430	4583	1	0.02	0	0	4	0.07	12	0.22	18	0.3	7	0.13	6.51776	2.97889	1.30227	2.28747	0.0221685	0.999779	Ups	9	29994439	30007477	+	tmem30c	transmembrane protein 30C [Source:ZFIN%3BAcc:ZDB-GENE-040426-1127]	-	-	-	-	-
ENSDARG00000069189	1107	0	0	0	0	4	0.28	3	0.23	73	5.1	1	0.08	11.7217	4.3397	1.89959	2.28454	0.0223399	0.999779	Ups	18	19120984	19124312	+	si:dkey-242h9.3	si:dkey-242h9.3 [Source:ZFIN%3BAcc:ZDB-GENE-060503-347]	-	-	-	-	-
ENSDARG00000102432	3627	0	0	5	0.13	2	0.04	6	0.14	109	2.33	2	0.05	18.4268	3.72191	1.63241	2.28001	0.0226072	0.999779	Ups	4	75883021	75930031	-	si:dkey-261j11.3	si:dkey-261j11.3 [Source:ZFIN%3BAcc:ZDB-GENE-131122-1]	-	-	-	K12800	;ko04217 Necroptosis;ko04621 NOD-like receptor signaling pathway;ko04625 C-type lectin receptor signaling pathway;ko05130 Pathogenic Escherichia coli infection;ko05131 Shigellosis;ko05132 Salmonella infection;ko05133 Pertussis;ko05135 Yersinia infection;ko05164 Influenza A;ko05171 Coronavirus disease - COVID-19;
ENSDARG00000115962	744	26	2.94	5	0.62	36	3.79	1	0.11	4	0.42	7	0.82	11.7924	-2.48296	1.09252	-2.27268	0.0230456	0.999779	Down	5	1089600	1091763	+	LO017799.1	transcription factor Adf-1-like [Source:NCBI gene%3BAcc:110439798]	-	-	-	-	-
ENSDARG00000086300	1265	2	0.13	6	0.44	1	0.06	23	1.55	62	3.79	3	0.21	15.3913	3.01226	1.3277	2.26877	0.0232822	0.999779	Ups	11	4205567	4235811	-	FAM107A	si:ch211-236d3.4 [Source:ZFIN%3BAcc:ZDB-GENE-141216-56]	-	-	-	-	-
ENSDARG00000096921	803	9	0.94	1	0.11	25	2.44	0	0	0	0	2	0.22	5.2161	-4.04374	1.78335	-2.2675	0.0233595	0.999779	Down	3	24438616	24451439	+	CR790377.2	-	-	-	-	-	-
ENSDARG00000115096	1486	46	2.61	0	0	0	0	0	0	0	0	0	0	7.59782	-6.45407	2.84734	-2.2667	0.0234084	0.999779	Down	17	50057704	50059664	-	FO704836.1	-	-	GO:0005634:nucleus;	GO:0003677:DNA binding;GO:0000981:sequence-specific DNA binding RNA polymerase II transcription factor activity;GO:0046872:metal ion binding;	K09228	;ko05168 Herpes simplex virus 1 infection;
ENSDARG00000096815	473	17	3.03	2	0.39	2	0.33	0	0	1	0.16	0	0	3.64187	-4.3733	1.93039	-2.2655	0.0234819	0.999779	Down	18	25180927	25225387	-	BX901968.1	-	-	-	-	-	-
ENSDARG00000062632	4847	1	0.02	2	0.04	3	0.05	23	0.4	10	0.16	6	0.11	7.57267	2.74102	1.21304	2.25963	0.023844	0.999779	Ups	25	31958911	32018990	+	duox	dual oxidase [Source:ZFIN%3BAcc:ZDB-GENE-091117-14]	GO:0042335:cuticle development;GO:0019221:cytokine-mediated signaling pathway;GO:0006952:defense response;GO:0042446:hormone biosynthetic process;GO:0050665:hydrogen peroxide biosynthetic process;GO:0042744:hydrogen peroxide catabolic process;GO:0055114:oxidation-reduction process;GO:0051591:response to cAMP;GO:0006979:response to oxidative stress;GO:0042554:superoxide anion generation;GO:0006590…	GO:0016324:apical plasma membrane;GO:0005783:endoplasmic reticulum;GO:0043020:NADPH oxidase complex;GO:0005886:plasma membrane;GO:0045177:apical part of cell;GO:0030054:cell junction;GO:0005829:cytosol;	GO:0005509:calcium ion binding;GO:0020037:heme binding;GO:0016174:NAD(P)H oxidase activity;GO:0004601:peroxidase activity;GO:0016175:superoxide-generating NADPH oxidase activity;	K13411	;ko04013 MAPK signaling pathway - fly;ko04624 Toll and Imd signaling pathway;ko04918 Thyroid hormone synthesis;
ENSDARG00000096576	2563	0	0	0	0	0	0	0	0	27	0.82	2	0.07	4.17412	5.51132	2.44045	2.25832	0.0239257	0.999779	Ups	1	55279124	55287260	+	si:ch211-286b5.6	si:ch211-286b5.6 [Source:ZFIN%3BAcc:ZDB-GENE-121214-216]	-	-	-	K06467	;ko04514 Cell adhesion molecules;ko04640 Hematopoietic cell lineage;ko04662 B cell receptor signaling pathway;
ENSDARG00000107385	6245	255	3.44	456	6.72	269	3.37	124	1.69	131	1.62	180	2.52	243.337	-1.36536	0.605552	-2.25474	0.0241499	0.999779	Down	22	25554232	25609123	+	aars2	alanyl-tRNA synthetase 2%2C mitochondrial (putative) [Source:ZFIN%3BAcc:ZDB-GENE-041008-213]	GO:0006419:alanyl-tRNA aminoacylation;GO:0070143:mitochondrial alanyl-tRNA aminoacylation;GO:0033108:mitochondrial respiratory chain complex assembly;GO:0006400:tRNA modification;	GO:0005739:mitochondrion;	GO:0004813:alanine-tRNA ligase activity;GO:0016597:amino acid binding;GO:0002161:aminoacyl-tRNA editing activity;GO:0005524:ATP binding;GO:0000049:tRNA binding;GO:0008270:zinc ion binding;	K01872;K07820	;ko00970 Aminoacyl-tRNA biosynthesis;;ko00601 Glycosphingolipid biosynthesis - lacto and neolacto series;ko01100 Metabolic pathways;
ENSDARG00000041141	1989	37	1.57	2	0.09	8	0.31	3	0.13	0	0	1	0.04	8.27831	-3.49194	1.5508	-2.25171	0.0243406	0.999779	Down	15	28086193	28107505	-	cryba1a	crystallin%2C beta A1a [Source:ZFIN%3BAcc:ZDB-GENE-040718-107]	GO:0002088:lens development in camera-type eye;GO:0007601:visual perception;	-	GO:0005212:structural constituent of eye lens;	-	-
ENSDARG00000092070	3096	0	0	1	0.03	2	0.05	18	0.49	31	0.77	0	0	8.28439	4.03246	1.79244	2.2497	0.0244678	0.999779	Ups	1	58150000	58155977	+	si:ch211-15j1.3	si:ch211-15j1.3 [Source:ZFIN%3BAcc:ZDB-GENE-081031-24]	-	-	-	K12800	;ko04217 Necroptosis;ko04621 NOD-like receptor signaling pathway;ko04625 C-type lectin receptor signaling pathway;ko05130 Pathogenic Escherichia coli infection;ko05131 Shigellosis;ko05132 Salmonella infection;ko05133 Pertussis;ko05135 Yersinia infection;ko05164 Influenza A;ko05171 Coronavirus disease - COVID-19;
ENSDARG00000115421	1159	112	8.14	99	7.86	191	12.9	267	19.61	253	16.89	329	24.79	198.254	1.05032	0.467295	2.24766	0.0245981	0.999779	Ups	1	961607	970951	+	n6amt1	N-6 adenine-specific DNA methyltransferase 1 [Source:ZFIN%3BAcc:ZDB-GENE-040718-206]	GO:0018872:arsonoacetate metabolic process;GO:0032775:DNA methylation on adenine;GO:0032259:methylation;GO:0018364:peptidyl-glutamine methylation;GO:0030307:positive regulation of cell growth;GO:0009404:toxin metabolic process;GO:0006415:translational termination;	GO:0005829:cytosol;GO:0035657:eRF1 methyltransferase complex;GO:0005634:nucleus;GO:0032991:macromolecular complex;	GO:0030792:methylarsonite methyltransferase activity;GO:0003676:nucleic acid binding;GO:0008276:protein methyltransferase activity;GO:0036009:protein-glutamine N-methyltransferase activity;GO:0008757:S-adenosylmethionine-dependent methyltransferase activity;GO:0009007:site-specific DNA-methyltransferase (adenine-specific) activity;	K19589	-
ENSDARG00000098821	2160	371	14.47	353	15.05	307	11.12	118	4.65	173	6.2	226	9.14	256.725	-1.15276	0.51379	-2.24364	0.0248555	0.999779	Down	3	59411956	60282382	+	sec14l1	SEC14-like protein 1 [Source:NCBI gene%3BAcc:110439320]	GO:0015871:choline transport;GO:0045087:innate immune response;GO:0039536:negative regulation of RIG-I signaling pathway;	GO:0005737:cytoplasm;GO:0005829:cytosol;GO:0005794:Golgi apparatus;GO:0005654:nucleoplasm;	GO:0098772:molecular function regulator;GO:0039552:RIG-I binding;	-	-
ENSDARG00000042291	1823	204	9.43	3	0.15	91	3.91	4	0.19	4	0.17	33	1.58	52.1759	-2.91395	1.29877	-2.24361	0.0248572	0.999779	Down	19	41419519	41467041	+	dlx6a	distal-less homeobox 6a [Source:NCBI gene%3BAcc:30586]	GO:0030154:cell differentiation;GO:0035141:medial fin morphogenesis;GO:0033339:pectoral fin development;GO:0045944:positive regulation of transcription from RNA polymerase II promoter;GO:0006357:regulation of transcription from RNA polymerase II promoter;	GO:0005634:nucleus;	GO:0003700:sequence-specific DNA binding transcription factor activity;GO:0000978:RNA polymerase II core promoter proximal region sequence-specific DNA binding;GO:0043565:sequence-specific DNA binding;	K09314	-
ENSDARG00000026081	3001	4	0.11	29	0.89	7	0.18	3	0.09	1	0.03	2	0.06	8.82202	-2.99263	1.33587	-2.24022	0.0250769	0.999779	Down	13	47573405	47618847	+	lhcgr	luteinizing hormone/choriogonadotropin receptor [Source:ZFIN%3BAcc:ZDB-GENE-040806-3]	GO:0007190:activation of adenylate cyclase activity;GO:0007189:adenylate cyclase-activating G-protein coupled receptor signaling pathway;GO:0071373:cellular response to luteinizing hormone stimulus;GO:0009755:hormone-mediated signaling pathway;GO:0042700:luteinizing hormone signaling pathway;GO:0022602:ovulation cycle process;GO:0007200:phospholipase C-activating G-protein coupled receptor signal…	GO:0005887:integral component of plasma membrane;GO:0005886:plasma membrane;	GO:0008528:G-protein coupled peptide receptor activity;GO:0004964:luteinizing hormone receptor activity;	K04248	;ko04020 Calcium signaling pathway;ko04024 cAMP signaling pathway;ko04080 Neuroactive ligand-receptor interaction;ko04913 Ovarian steroidogenesis;ko04917 Prolactin signaling pathway;
ENSDARG00000033227	729	27	3.12	82	10.36	162	17.39	101	11.8	1653	175.45	42	5.03	305.771	2.60869	1.16553	2.2382	0.0252079	0.999779	Ups	14	36885524	36887063	+	lect2l	leukocyte cell-derived chemotaxin 2 like [Source:ZFIN%3BAcc:ZDB-GENE-070127-4]	GO:0006935:chemotaxis;	GO:0005576:extracellular region;	GO:0042802:identical protein binding;GO:0046872:metal ion binding;	-	-
ENSDARG00000070991	3340	76	1.92	48	1.32	103	2.41	151	3.85	153	3.54	201	5.26	115.428	1.12699	0.504081	2.23573	0.0253693	0.999779	Ups	6	15604759	15641686	-	mlpha	melanophilin a [Source:ZFIN%3BAcc:ZDB-GENE-050208-724]	-	-	-	-	-
ENSDARG00000079914	934	14	1.26	24	2.37	253	21.2	643	58.61	1301	107.78	8	0.75	348.142	2.93805	1.31747	2.23008	0.0257422	0.999779	Ups	15	3246323	3252727	-	stoml3a	stomatin (EPB72)-like 3a [Source:ZFIN%3BAcc:ZDB-GENE-070620-18]	GO:0043312:neutrophil degranulation;GO:0044829:positive regulation by host of viral genome replication;GO:0090314:positive regulation of protein targeting to membrane;GO:0051260:protein homooligomerization;GO:1901585:regulation of acid-sensing ion channel activity;	GO:0035577:azurophil granule membrane;GO:0072562:blood microparticle;GO:0005856:cytoskeleton;GO:0005783:endoplasmic reticulum;GO:0070062:extracellular exosome;GO:0005615:extracellular space;GO:0005887:integral component of plasma membrane;GO:0042470:melanosome;GO:0016020:membrane;GO:0045121:membrane raft;GO:0005739:mitochondrion;GO:0048471:perinuclear region of cytoplasm;GO:0005886:plasma membran…	GO:0042803:protein homodimerization activity;GO:0070063:RNA polymerase binding;	K17286	-
ENSDARG00000114124	906	0	0	21	2.13	4	0.35	1	0.09	0	0	0	0	5.23999	-4.89084	2.19488	-2.22829	0.0258609	0.999779	Down	4	37710093	37715686	+	si:dkey-3p4.8	si:dkey-3p4.8 [Source:ZFIN%3BAcc:ZDB-GENE-120215-16]	-	GO:0005634:nucleus;	GO:0003677:DNA binding;GO:0046872:metal ion binding;	K09228	;ko05168 Herpes simplex virus 1 infection;
ENSDARG00000056795	1789	48	2.26	45	2.32	223	9.76	175	8.33	1086	46.97	96	4.69	249.127	2.12487	0.955559	2.2237	0.0261687	0.999779	Ups	7	26265584	26270014	-	serpine1	serpin peptidase inhibitor%2C clade E (nexin%2C plasminogen activator inhibitor type 1)%2C member 1 [Source:ZFIN%3BAcc:ZDB-GENE-070912-60]	-	-	-	K03982	;ko04066 HIF-1 signaling pathway;ko04115 p53 signaling pathway;ko04218 Cellular senescence;ko04371 Apelin signaling pathway;ko04390 Hippo signaling pathway;ko04610 Complement and coagulation cascades;ko04933 AGE-RAGE signaling pathway in diabetic complications;ko05142 Chagas disease;
ENSDARG00000019660	2640	94	3	1	0.03	94	2.79	1	0.03	8	0.23	15	0.5	31.3728	-2.98148	1.34092	-2.22346	0.0261845	0.999779	Down	15	31735931	31772657	+	rxfp2b	relaxin family peptide receptor 2b [Source:ZFIN%3BAcc:ZDB-GENE-110408-27]	GO:0007190:activation of adenylate cyclase activity;GO:0007189:adenylate cyclase-activating G-protein coupled receptor signaling pathway;GO:0007193:adenylate cyclase-inhibiting G-protein coupled receptor signaling pathway;GO:0007186:G-protein coupled receptor signaling pathway;GO:0009755:hormone-mediated signaling pathway;GO:0008584:male gonad development;GO:0043066:negative regulation of apoptot…	GO:0005887:integral component of plasma membrane;GO:0005886:plasma membrane;	GO:0008528:G-protein coupled peptide receptor activity;GO:0017046:peptide hormone binding;GO:0016500:protein-hormone receptor activity;	K04306	;ko04080 Neuroactive ligand-receptor interaction;ko04926 Relaxin signaling pathway;
ENSDARG00000095993	1507	0	0	0	0	0	0	8	0.45	13	0.67	0	0	3.35938	5.1918	2.33823	2.2204	0.0263918	0.999779	Ups	4	43392655	43402114	+	znf1073	zinc finger protein 1073 [Source:ZFIN%3BAcc:ZDB-GENE-110913-154]	-	GO:0005634:nucleus;	GO:0003677:DNA binding;GO:0046872:metal ion binding;	K09228	;ko05168 Herpes simplex virus 1 infection;
ENSDARG00000103398	559	76	11.45	6	0.99	1189	166.46	20	3.05	45	6.23	94	14.68	190.985	-2.81165	1.2663	-2.22037	0.0263935	0.999779	Down	8	1009831	1013283	+	fabp1b.2	fatty acid binding protein 1b%2C liver%2C tandem duplicate 2 [Source:ZFIN%3BAcc:ZDB-GENE-100318-6]	GO:0033993:response to lipid;	GO:0005737:cytoplasm;	GO:0032052:bile acid binding;GO:0005504:fatty acid binding;	-	-
ENSDARG00000053344	3995	130	2.74	7	0.16	150	2.94	7	0.15	3	0.06	36	0.79	49.275	-2.60578	1.17751	-2.21295	0.026901	0.999779	Down	8	43814821	43923788	-	adgrd1	adhesion G protein-coupled receptor D1 [Source:ZFIN%3BAcc:ZDB-GENE-041212-24]	GO:0007189:adenylate cyclase-activating G-protein coupled receptor signaling pathway;GO:0007166:cell surface receptor signaling pathway;GO:0007186:G-protein coupled receptor signaling pathway;	GO:0005887:integral component of plasma membrane;GO:0005886:plasma membrane;	GO:0004930:G-protein coupled receptor activity;	K08465	-
ENSDARG00000007753	3633	2	0.05	2	0.05	5	0.11	41	0.96	17	0.36	2	0.05	11.7741	2.86072	1.29368	2.2113	0.0270149	0.999779	Ups	18	17660158	17704546	+	cpne2	copine II [Source:ZFIN%3BAcc:ZDB-GENE-030131-7896]	GO:0071277:cellular response to calcium ion;	GO:0005737:cytoplasm;GO:0070062:extracellular exosome;GO:0005634:nucleus;GO:0005886:plasma membrane;	GO:0005544:calcium-dependent phospholipid binding;	-	-
ENSDARG00000102917	956	0	0	0	0	2	0.16	43	3.83	3	0.24	0	0	8.69313	4.85997	2.19829	2.2108	0.0270498	0.999779	Ups	4	58298838	58318488	+	CR388095.1	-	-	-	-	-	-
ENSDARG00000058508	3153	16	0.43	3	0.09	65	1.61	2	0.05	8	0.2	1	0.03	13.3412	-2.80722	1.27357	-2.20422	0.0275088	0.999779	Down	3	11977271	12026741	-	cfap70	cilia and flagella associated protein 70 [Source:ZFIN%3BAcc:ZDB-GENE-091204-50]	-	GO:0005929:cilium;	-	-	-
ENSDARG00000037905	7101	11	0.13	2	0.03	26	0.29	77	0.92	32	0.35	41	0.5	30.4741	2.1236	0.9637	2.20359	0.0275533	0.999779	Ups	3	33773156	33901483	-	cacna1aa	calcium channel%2C voltage-dependent%2C P/Q type%2C alpha 1A subunit%2C a [Source:ZFIN%3BAcc:ZDB-GENE-040724-26]	GO:0070509:calcium ion import;GO:0070588:calcium ion transmembrane transport;GO:0006816:calcium ion transport;GO:0008219:cell death;GO:0007268:synaptic transmission;GO:0051899:membrane depolarization;GO:0050804:regulation of synaptic transmission;GO:0007204:positive regulation of cytosolic calcium ion concentration;GO:0050796:regulation of insulin secretion;GO:0034765:regulation of ion transmembr…	GO:0042995:cell projection;GO:0005737:cytoplasm;GO:0016021:integral component of membrane;GO:0043025:neuronal cell body;GO:0005634:nucleus;GO:0005886:plasma membrane;GO:0005891:voltage-gated calcium channel complex;GO:0043204:perikaryon;GO:0032991:macromolecular complex;	GO:0001540:beta-amyloid binding;GO:0008331:high voltage-gated calcium channel activity;GO:0046872:metal ion binding;GO:0019905:syntaxin binding;GO:0005245:voltage-gated calcium channel activity;GO:0005516:calmodulin binding;	K04344	;ko04010 MAPK signaling pathway;ko04020 Calcium signaling pathway;ko04721 Synaptic vesicle cycle;ko04723 Retrograde endocannabinoid signaling;ko04724 Glutamatergic synapse;ko04725 Cholinergic synapse;ko04726 Serotonergic synapse;ko04727 GABAergic synapse;ko04728 Dopaminergic synapse;ko04730 Long-term depression;ko04742 Taste transduction;ko04930 Type II diabetes mellitus;ko05017 Spinocerebellar a…
ENSDARG00000058351	4800	41	0.72	553	10.61	182	2.97	75	1.33	93	1.5	17	0.31	179.545	-2.32894	1.05702	-2.2033	0.0275737	0.999779	Down	16	9787383	9802998	-	tapbpl	TAP binding protein like [Source:ZFIN%3BAcc:ZDB-GENE-121003-1]	-	-	-	-	-
ENSDARG00000096037	859	10	0.98	5	0.54	54	4.92	72	7.14	60	5.4	115	11.69	48.3799	1.97774	0.898289	2.20167	0.0276886	0.999779	Ups	4	5249494	5253973	+	si:ch211-214j24.14	si:ch211-214j24.14 [Source:ZFIN%3BAcc:ZDB-GENE-110914-226]	-	-	-	-	-
ENSDARG00000100952	399	46	9.71	198	45.69	267	52.37	2396	511.26	414	80.29	49	10.72	597.442	2.59561	1.17911	2.20133	0.0277124	0.999779	Ups	13	2908764	2913899	+	wu:fj16a03	wu:fj16a03 [Source:ZFIN%3BAcc:ZDB-GENE-030131-7415]	-	-	-	-	-
ENSDARG00000099873	801	139	14.62	16	1.84	9	0.88	15	1.59	4	0.39	7	0.76	31.9577	-2.66557	1.21225	-2.19886	0.0278881	0.999779	Down	3	49021079	49024570	+	zgc:163083	zgc:163083 [Source:ZFIN%3BAcc:ZDB-GENE-070424-53]	-	-	-	-	-
ENSDARG00000117734	670	41	5.15	0	0	0	0	0	0	0	0	0	0	6.77197	-6.28812	2.86026	-2.19844	0.0279178	0.999779	Down	15	46291409	46295532	+	CABZ01044023.1	-	-	-	-	-	-
ENSDARG00000076398	1291	0	0	0	0	5	0.3	14	0.92	49	2.94	1	0.07	10.4451	3.82698	1.74437	2.19391	0.028242	0.999779	Ups	7	3171585	3188276	+	si:dkey-201l21.4	si:dkey-201l21.4 [Source:ZFIN%3BAcc:ZDB-GENE-060531-98]	-	-	-	-	-
ENSDARG00000077219	3496	0	0	0	0	1	0.02	0	0	0	0	63	1.57	9.25048	5.67458	2.58768	2.19292	0.0283131	0.999779	Ups	2	31614533	31626209	+	si:ch211-106h4.6	si:ch211-106h4.6 [Source:ZFIN%3BAcc:ZDB-GENE-070705-16]	-	GO:0016021:integral component of membrane;	-	-	-
ENSDARG00000111716	1424	0	0	1	0.06	2	0.11	5	0.3	35	1.9	1	0.06	6.58498	3.68166	1.67959	2.19201	0.0283791	0.999779	Ups	4	45357558	45359149	+	si:ch211-162i8.5	si:ch211-162i8.5 [Source:ZFIN%3BAcc:ZDB-GENE-110914-30]	GO:0007010:cytoskeleton organization;GO:0022604:regulation of cell morphogenesis;GO:0006355:regulation of transcription, DNA-templated;	GO:0005634:nucleus;	GO:0003677:DNA binding;GO:0046872:metal ion binding;	K09228	;ko05168 Herpes simplex virus 1 infection;
ENSDARG00000088805	8377	16	0.16	15	0.16	91	0.85	167	1.7	576	5.32	5	0.05	132.297	2.69814	1.23453	2.18556	0.0288481	0.999779	Ups	16	29043813	29057849	+	nes	nestin [Source:NCBI gene%3BAcc:100150939]	GO:0007420:brain development;GO:0021545:cranial nerve development;GO:0031076:embryonic camera-type eye development;GO:0043066:negative regulation of apoptotic process;GO:0030844:positive regulation of intermediate filament depolymerization;GO:2000179:positive regulation of neural precursor cell proliferation;	GO:0005882:intermediate filament;	GO:0019215:intermediate filament binding;GO:0005198:structural molecule activity;	K07609	-
ENSDARG00000060103	1882	40	1.79	32	1.57	39	1.62	171	7.74	172	7.07	37	1.72	80.4826	1.74014	0.797777	2.18123	0.0291663	0.999779	Ups	13	42406883	42472060	+	cpeb3	cytoplasmic polyadenylation element binding protein 3 [Source:ZFIN%3BAcc:ZDB-GENE-090312-68]	GO:0061158:3'-UTR-mediated mRNA destabilization;GO:0071230:cellular response to amino acid stimulus;GO:0007616:long-term memory;GO:2000766:negative regulation of cytoplasmic translation;GO:1900248:negative regulation of cytoplasmic translational elongation;GO:0000122:negative regulation of transcription from RNA polymerase II promoter;GO:0017148:negative regulation of translation;GO:0060999:posit…	GO:0097440:apical dendrite;GO:0030014:CCR4-NOT complex;GO:0030054:cell junction;GO:0005737:cytoplasm;GO:0030425:dendrite;GO:1990124:messenger ribonucleoprotein complex;GO:0043005:neuron projection;GO:0005634:nucleus;GO:0014069:postsynaptic density;GO:0045211:postsynaptic membrane;GO:0045202:synapse;	GO:0035925:mRNA 3'-UTR AU-rich region binding;GO:0003730:mRNA 3'-UTR binding;GO:0043022:ribosome binding;GO:0003723:RNA binding;GO:0035613:RNA stem-loop binding;GO:0008135:translation factor activity, RNA binding;GO:0000900:translation repressor activity, nucleic acid binding;	K02602	;ko04114 Oocyte meiosis;ko04320 Dorso-ventral axis formation;ko04914 Progesterone-mediated oocyte maturation;
ENSDARG00000002355	1505	40	2.24	2	0.12	16	0.83	3	0.17	2	0.1	4	0.23	10.5276	-2.68629	1.23227	-2.17995	0.0292611	0.999779	Down	5	42124706	42132825	+	shpk	sedoheptulokinase [Source:ZFIN%3BAcc:ZDB-GENE-060526-357]	GO:0005975:carbohydrate metabolic process;GO:0035963:cellular response to interleukin-13;GO:0071353:cellular response to interleukin-4;GO:0071222:cellular response to lipopolysaccharide;GO:0009052:pentose-phosphate shunt, non-oxidative branch;GO:0016310:phosphorylation;GO:0050727:regulation of inflammatory response;GO:0043030:regulation of macrophage activation;	GO:0005737:cytoplasm;	GO:0005524:ATP binding;GO:0050277:sedoheptulokinase activity;	K11214	;ko00710 Carbon fixation in photosynthetic organisms;ko01100 Metabolic pathways;
ENSDARG00000105557	4166	5	0.1	46	1.02	10	0.19	318	6.5	117	2.17	15	0.31	90.2501	2.70705	1.24212	2.17938	0.0293037	0.999779	Ups	7	24840701	24853898	-	BX511061.1	uncharacterized LOC101885004 [Source:NCBI gene%3BAcc:101885004]	-	-	-	-	-
ENSDARG00000060034	2515	1	0.03	5	0.18	13	0.4	0	0	0	0	1	0.03	3.06687	-4.11944	1.89534	-2.17346	0.0297456	0.999779	Down	20	51312883	51334529	+	tmem151ba	transmembrane protein 151Ba [Source:NCBI gene%3BAcc:100006371]	-	GO:0016021:integral component of membrane;	-	-	-
ENSDARG00000054797	1401	14	0.84	1	0.07	4	0.22	0	0	0	0	1	0.06	3.18909	-4.17789	1.92492	-2.17042	0.0299751	0.999779	Down	19	42418227	42424599	-	zgc:153441	zgc:153441 [Source:ZFIN%3BAcc:ZDB-GENE-060825-39]	-	-	-	-	-
ENSDARG00000045442	2220	0	0	1	0.04	3	0.11	8	0.31	2	0.07	30	1.18	6.72333	3.30756	1.526	2.16748	0.0301984	0.999779	Ups	24	4755391	4765740	-	cpb1	carboxypeptidase B1 (tissue) [Source:ZFIN%3BAcc:ZDB-GENE-030131-1132]	GO:0006508:proteolysis;	GO:0005615:extracellular space;	GO:0004181:metallocarboxypeptidase activity;GO:0008270:zinc ion binding;	K01291	;ko04972 Pancreatic secretion;ko04974 Protein digestion and absorption;
ENSDARG00000096940	2984	10	0.28	709	21.88	208	5.46	6	0.17	140	3.63	9	0.26	204.249	-3.00724	1.38752	-2.16734	0.0302087	0.999779	Down	25	10987817	11001745	+	si:dkey-52p2.5	si:dkey-52p2.5 [Source:ZFIN%3BAcc:ZDB-GENE-161101-1]	-	-	-	-	-
ENSDARG00000018393	4312	11	0.21	17	0.36	42	0.76	51	1.01	270	4.85	19	0.38	61.9958	2.22559	1.02826	2.16442	0.0304324	0.999779	Ups	3	55161627	55214130	-	kank2	KN motif and ankyrin repeat domains 2 [Source:NCBI gene%3BAcc:571549]	GO:0006915:apoptotic process;GO:0032836:glomerular basement membrane development;GO:0072015:glomerular visceral epithelial cell development;GO:0030837:negative regulation of actin filament polymerization;GO:0035023:regulation of Rho protein signal transduction;	GO:0005737:cytoplasm;GO:0005739:mitochondrion;	-	-	-
ENSDARG00000094327	1407	2	0.12	0	0	0	0	3	0.18	22	1.21	5	0.31	4.77785	3.75231	1.73466	2.16314	0.0305303	0.999779	Ups	11	16084581	16093022	-	SPATA1	si:dkey-205k8.5 [Source:ZFIN%3BAcc:ZDB-GENE-141216-11]	-	-	-	-	-
ENSDARG00000058494	2902	1566	45.45	489	15.51	2172	58.57	453	13.29	543	14.48	756	22.75	916.318	-1.24522	0.575874	-2.16231	0.0305943	0.999779	Down	3	11926030	11947672	+	dnaja3a	DnaJ heat shock protein family (Hsp40) member A3a [Source:ZFIN%3BAcc:ZDB-GENE-030131-7837]	GO:0006919:activation of cysteine-type endopeptidase activity involved in apoptotic process;GO:0006924:activation-induced cell death of T cells;GO:0007569:cell aging;GO:0006264:mitochondrial DNA replication;GO:0007005:mitochondrion organization;GO:0043066:negative regulation of apoptotic process;GO:0008285:negative regulation of cell proliferation;GO:0043154:negative regulation of cysteine-type e…	GO:0030054:cell junction;GO:0005737:cytoplasm;GO:0005829:cytosol;GO:0019897:extrinsic component of plasma membrane;GO:0043231:intracellular membrane-bounded organelle;GO:0005759:mitochondrial matrix;GO:0042645:mitochondrial nucleoid;GO:0005739:mitochondrion;GO:0031594:neuromuscular junction;GO:0005634:nucleus;GO:0045211:postsynaptic membrane;	GO:0005524:ATP binding;GO:0030695:GTPase regulator activity;GO:0030544:Hsp70 protein binding;GO:0005133:interferon-gamma receptor binding;GO:0046872:metal ion binding;GO:0051059:NF-kappaB binding;GO:0019901:protein kinase binding;GO:0044877:macromolecular complex binding;GO:0008134:transcription factor binding;GO:0051082:unfolded protein binding;	K09504	;ko05203 Viral carcinogenesis;
ENSDARG00000028163	2867	23	0.68	19	0.61	234	6.39	450	13.36	1236	33.36	8	0.24	300.823	2.78389	1.28754	2.16217	0.0306048	0.999779	Ups	20	34029820	34039638	+	prg4b	proteoglycan 4b [Source:ZFIN%3BAcc:ZDB-GENE-041014-324]	GO:0071425:hematopoietic stem cell proliferation;GO:0006955:immune response;GO:0045409:negative regulation of interleukin-6 biosynthetic process;GO:0042127:regulation of cell proliferation;	GO:0005615:extracellular space;	GO:0030247:polysaccharide binding;GO:0005044:scavenger receptor activity;	-	-
ENSDARG00000008029	2719	0	0	1	0.03	0	0	18	0.56	1	0.03	2	0.06	3.99988	4.39042	2.03067	2.16206	0.0306139	0.999779	Ups	20	35484070	35496459	+	mep1a.2	meprin A%2C alpha (PABA peptide hydrolase)%2C tandem duplicate 2 [Source:ZFIN%3BAcc:ZDB-GENE-041001-208]	-	GO:0070062:extracellular exosome;GO:0005615:extracellular space;GO:0005887:integral component of plasma membrane;GO:0017090:meprin A complex;	GO:0004222:metalloendopeptidase activity;GO:0008270:zinc ion binding;	K01395	;ko04974 Protein digestion and absorption;
ENSDARG00000094486	495	0	0	0	0	0	0	9	1.55	10	1.56	0	0	3.11389	5.08039	2.35176	2.16025	0.0307533	0.999779	Ups	20	3290188	3290791	-	si:ch1073-412h12.3	si:ch1073-412h12.3 [Source:ZFIN%3BAcc:ZDB-GENE-081104-86]	GO:0045944:positive regulation of transcription from RNA polymerase II promoter;GO:0042254:ribosome biogenesis;GO:0006366:transcription from RNA polymerase II promoter;	GO:0005634:nucleus;	GO:0003677:DNA binding;GO:0001228:RNA polymerase II transcription regulatory region sequence-specific DNA binding transcription factor activity involved in positive regulation of transcription;GO:0000981:sequence-specific DNA binding RNA polymerase II transcription factor activity;GO:0003723:RNA binding;GO:0000978:RNA polymerase II core promoter proximal region sequence-specific DNA binding;	K14832	-
ENSDARG00000021924	2358	41	1.46	97	3.79	208	6.9	162	5.85	1652	54.21	56	2.07	330.494	2.33842	1.08347	2.15826	0.0309073	0.999779	Ups	3	26123736	26127091	+	hsp70.3	heat shock cognate 70-kd protein%2C tandem duplicate 3 [Source:ZFIN%3BAcc:ZDB-GENE-110713-1]	-	GO:0005737:cytoplasm;GO:0005634:nucleus;	GO:0005524:ATP binding;	K03283	;ko03040 Spliceosome;ko04010 MAPK signaling pathway;ko04141 Protein processing in endoplasmic reticulum;ko04144 Endocytosis;ko04213 Longevity regulating pathway - multiple species;ko04612 Antigen processing and presentation;ko04915 Estrogen signaling pathway;ko05020 Prion disease;ko05134 Legionellosis;ko05145 Toxoplasmosis;ko05162 Measles;
ENSDARG00000055722	6785	421	5.23	515	6.99	213	2.46	145	1.82	44	0.5	211	2.72	272.163	-1.7052	0.790142	-2.15809	0.0309208	0.999779	Down	5	30052714	30080332	-	bco2a	beta-carotene oxygenase 2a [Source:ZFIN%3BAcc:ZDB-GENE-030131-8039]	GO:0016121:carotene catabolic process;GO:0016119:carotene metabolic process;GO:0016116:carotenoid metabolic process;GO:0055114:oxidation-reduction process;GO:0051881:regulation of mitochondrial membrane potential;GO:2000377:regulation of reactive oxygen species metabolic process;GO:0042574:retinal metabolic process;GO:0042573:retinoic acid metabolic process;GO:0016122:xanthophyll metabolic proces…	GO:0005739:mitochondrion;	GO:0003834:beta-carotene 15,15'-monooxygenase activity;GO:0010436:carotenoid dioxygenase activity;GO:0046872:metal ion binding;GO:0016702:oxidoreductase activity, acting on single donors with incorporation of molecular oxygen, incorporation of two atoms of oxygen;GO:0004744:retinal isomerase activity;	K10252	-
ENSDARG00000005565	6278	29	0.39	41	0.6	107	1.33	44	0.6	599	7.38	122	1.7	139.481	2.02819	0.941214	2.15486	0.0311725	0.999779	Ups	6	41038757	41060423	+	entpd8	ectonucleoside triphosphate diphosphohydrolase 8 [Source:ZFIN%3BAcc:ZDB-GENE-040724-142]	-	GO:0016021:integral component of membrane;GO:0005886:plasma membrane;	GO:0005524:ATP binding;GO:0046872:metal ion binding;	K01510	;ko00230 Purine metabolism;ko00240 Pyrimidine metabolism;ko01100 Metabolic pathways;ko05169 Epstein-Barr virus infection;
ENSDARG00000061481	2359	13	0.46	26	1.01	50	1.66	65	2.35	307	10.07	29	1.07	74.6796	2.08892	0.970465	2.15249	0.0313585	0.999779	Ups	24	29758272	29777413	-	wu:fj05g07	wu:fj05g07 [Source:ZFIN%3BAcc:ZDB-GENE-030131-7307]	-	GO:0016021:integral component of membrane;	GO:0016491:oxidoreductase activity;	-	-
ENSDARG00000103663	833	2	0.2	0	0	8	0.75	52	5.31	20	1.86	2	0.21	14.2078	3.17761	1.48019	2.14676	0.0318121	0.999779	Ups	11	37105640	37120954	-	NINJ1	si:ch1073-278o19.1 [Source:ZFIN%3BAcc:ZDB-GENE-141216-96]	GO:0007155:cell adhesion;GO:1990384:hyaloid vascular plexus regression;GO:0007399:nervous system development;GO:0001954:positive regulation of cell-matrix adhesion;GO:0042246:tissue regeneration;	GO:0016021:integral component of membrane;	-	-	-
ENSDARG00000017165	3754	3	0.07	1	0.02	4	0.08	33	0.75	4	0.08	10	0.23	9.39308	2.69605	1.25719	2.14451	0.0319924	0.999779	Ups	13	10649069	10672538	-	slc3a1	solute carrier family 3 member 1 [Source:ZFIN%3BAcc:ZDB-GENE-090313-225]	GO:0006865:amino acid transport;GO:0015802:basic amino acid transport;GO:0005975:carbohydrate metabolic process;GO:0006520:cellular amino acid metabolic process;GO:0015811:L-cystine transport;	GO:0031526:brush border membrane;GO:0070062:extracellular exosome;GO:0005887:integral component of plasma membrane;GO:0016020:membrane;GO:0005886:plasma membrane;GO:0005774:vacuolar membrane;	GO:0015171:amino acid transmembrane transporter activity;GO:0015174:basic amino acid transmembrane transporter activity;GO:0003824:catalytic activity;GO:0015184:L-cystine transmembrane transporter activity;GO:0046982:protein heterodimerization activity;	K14210	;ko04974 Protein digestion and absorption;
ENSDARG00000092511	392	0	0	0	0	0	0	36	7.82	0	0	0	0	6.70069	6.18615	2.88587	2.1436	0.032065	0.999779	Ups	23	15750018	15751546	+	CR376835.1	-	-	-	-	-	-
ENSDARG00000104286	642	0	0	0	0	0	0	21	2.78	0	0	1	0.14	4.05352	5.45703	2.54588	2.14348	0.0320747	0.999779	Ups	11	14862286	14863542	+	CU019562.3	-	-	-	-	-	-
ENSDARG00000087509	835	0	0	0	0	2	0.19	7	0.71	3	0.28	14	1.46	4.01944	3.65421	1.70498	2.14326	0.0320924	0.999779	Ups	16	21827332	21829594	-	si:ch73-322b17.4	si:ch73-322b17.4 [Source:ZFIN%3BAcc:ZDB-GENE-131121-87]	-	-	-	-	-
ENSDARG00000054373	1261	41	2.74	105	7.67	169	10.49	447	30.18	1376	84.43	13	0.9	334.306	2.4655	1.15066	2.14269	0.0321382	0.999779	Ups	8	13572531	13574764	-	b3gnt3.2	UDP-GlcNAc:betaGal beta-1%2C3-N-acetylglucosaminyltransferase 3%2C tendem duplicate 2 [Source:ZFIN%3BAcc:ZDB-GENE-081104-528]	GO:0018146:keratan sulfate biosynthetic process;GO:0016266:O-glycan processing;GO:0030311:poly-N-acetyllactosamine biosynthetic process;GO:0006486:protein glycosylation;	GO:0005783:endoplasmic reticulum;GO:0005794:Golgi apparatus;GO:0000139:Golgi membrane;GO:0005887:integral component of plasma membrane;	GO:0008376:acetylgalactosaminyltransferase activity;GO:0047223:beta-1,3-galactosyl-O-glycosyl-glycoprotein beta-1,3-N-acetylglucosaminyltransferase activity;GO:0008378:galactosyltransferase activity;GO:0008532:N-acetyllactosaminide beta-1,3-N-acetylglucosaminyltransferase activity;	K07970	;ko00601 Glycosphingolipid biosynthesis - lacto and neolacto series;ko01100 Metabolic pathways;
ENSDARG00000042221	6304	25	0.33	47	0.69	81	1.01	165	2.23	566	6.95	19	0.26	139.625	2.2162	1.0346	2.14209	0.032186	0.999779	Ups	20	26478197	26532167	-	mthfd1l	methylenetetrahydrofolate dehydrogenase (NADP+ dependent) 1 like [Source:ZFIN%3BAcc:ZDB-GENE-041001-133]	GO:0009257:10-formyltetrahydrofolate biosynthetic process;GO:0048702:embryonic neurocranium morphogenesis;GO:0048703:embryonic viscerocranium morphogenesis;GO:0046655:folic acid metabolic process;GO:0006760:folic acid-containing compound metabolic process;GO:0015942:formate metabolic process;GO:0001843:neural tube closure;GO:0009113:purine nucleobase biosynthetic process;GO:0035999:tetrahydrofola…	GO:0005737:cytoplasm;GO:0016020:membrane;GO:0005759:mitochondrial matrix;GO:0005739:mitochondrion;GO:0005829:cytosol;GO:0070062:extracellular exosome;	GO:0005524:ATP binding;GO:0004329:formate-tetrahydrofolate ligase activity;GO:0004488:methylenetetrahydrofolate dehydrogenase (NADP+) activity;GO:0042803:protein homodimerization activity;GO:0004477:methenyltetrahydrofolate cyclohydrolase activity;GO:0004487:methylenetetrahydrofolate dehydrogenase (NAD+) activity;GO:0004486:methylenetetrahydrofolate dehydrogenase [NAD(P)+] activity;	K13402	;ko00670 One carbon pool by folate;ko01100 Metabolic pathways;ko01240 Biosynthesis of cofactors;
ENSDARG00000074745	7585	1	0.01	0	0	0	0	6	0.07	7	0.07	3	0.03	2.72342	3.83382	1.79322	2.13795	0.0325207	0.999779	Ups	13	1726953	1786145	+	zmp:0000000760	zmp:0000000760 [Source:ZFIN%3BAcc:ZDB-GENE-130530-763]	-	GO:0019012:virion;	-	-	-
ENSDARG00000093781	4035	1	0.02	0	0	0	0	3	0.06	4	0.08	10	0.22	2.74691	3.85744	1.80551	2.13648	0.0326404	0.999779	Ups	18	16192083	16218370	+	lrriq1	leucine-rich repeats and IQ motif containing 1 [Source:ZFIN%3BAcc:ZDB-GENE-050419-235]	-	-	-	-	-
ENSDARG00000062788	2509	124	4.16	74	2.72	426	13.29	634	21.51	3549	109.45	8	0.28	721.175	2.78379	1.30352	2.13558	0.0327133	0.999779	Ups	14	11427052	11430610	-	irg1l	immunoresponsive gene 1%2C like [Source:ZFIN%3BAcc:ZDB-GENE-061103-301]	GO:0035458:cellular response to interferon-beta;GO:0071346:cellular response to interferon-gamma;GO:0071347:cellular response to interleukin-1;GO:0071222:cellular response to lipopolysaccharide;GO:0071219:cellular response to molecule of bacterial origin;GO:0071393:cellular response to progesterone stimulus;GO:0071356:cellular response to tumor necrosis factor;GO:0006952:defense response;GO:00075…	GO:0005739:mitochondrion;	GO:0047547:2-methylcitrate dehydratase activity;GO:0047613:aconitate decarboxylase activity;	K17724	;ko00660 C5-Branched dibasic acid metabolism;ko01100 Metabolic pathways;
ENSDARG00000104919	3256	70	1.81	30	0.85	299	7.19	352	9.2	2985	70.94	1	0.03	551.724	3.12774	1.47635	2.11856	0.0341275	0.999779	Ups	14	11430796	11438060	+	si:ch211-153b23.3	si:ch211-153b23.3 [Source:ZFIN%3BAcc:ZDB-GENE-141216-408]	-	-	-	-	-
ENSDARG00000093822	794	1	0.11	73	8.46	3	0.3	3	0.32	6	0.58	1	0.11	17.8935	-3.37594	1.59456	-2.11716	0.0342462	0.999779	Down	10	35329751	35338595	+	si:dkey-259j3.5	si:dkey-259j3.5 [Source:ZFIN%3BAcc:ZDB-GENE-091204-113]	-	-	-	-	-
ENSDARG00000101479	553	128	19.5	118	19.65	343	48.54	304	46.8	1918	268.37	130	20.53	442.226	1.95051	0.921533	2.11659	0.0342945	0.999779	Ups	2	51765179	51772438	-	BX908782.2	CD59 glycoprotein-like [Source:NCBI gene%3BAcc:103910140]	-	-	-	-	-
ENSDARG00000002311	636	2	0.26	0	0	3	0.37	3	0.4	48	5.84	2	0.27	8.47104	3.37585	1.59531	2.1161	0.034336	0.999779	Ups	16	16148761	16152199	-	fabp11b	fatty acid binding protein 11b [Source:ZFIN%3BAcc:ZDB-GENE-050522-391]	GO:0050873:brown fat cell differentiation;GO:0071285:cellular response to lithium ion;GO:0042632:cholesterol homeostasis;GO:0001816:cytokine production;GO:0006631:fatty acid metabolic process;GO:0015909:long-chain fatty acid transport;GO:0010629:negative regulation of gene expression;GO:0006469:negative regulation of protein kinase activity;GO:0045892:negative regulation of transcription, DNA-tem…	GO:0005737:cytoplasm;GO:0005829:cytosol;GO:0005634:nucleus;	GO:0036041:long-chain fatty acid binding;GO:0005324:long-chain fatty acid transporter activity;	-	-
ENSDARG00000056719	2538	10	0.33	0	0	12	0.37	65	2.18	16	0.49	31	1.07	22.088	2.53232	1.19794	2.11389	0.0345246	0.999779	Ups	16	18974064	18998549	+	slc6a19b	solute carrier family 6 member 19b [Source:ZFIN%3BAcc:ZDB-GENE-030131-4755]	GO:0007584:response to nutrient;	GO:0016324:apical plasma membrane;GO:0031526:brush border membrane;GO:0005887:integral component of plasma membrane;GO:0005886:plasma membrane;	GO:0005328:neurotransmitter:sodium symporter activity;GO:0015175:neutral amino acid transmembrane transporter activity;	K05334	;ko04974 Protein digestion and absorption;ko04978 Mineral absorption;
ENSDARG00000089879	818	0	0	36	4.05	0	0	0	0	1	0.09	0	0	7.92337	-5.5193	2.61156	-2.11341	0.0345654	0.999779	Down	1	59154521	59158077	+	soul5l	heme-binding protein soul5%2C like [Source:ZFIN%3BAcc:ZDB-GENE-121214-315]	-	-	-	-	-
ENSDARG00000097553	2091	1	0.04	13	0.57	7	0.26	53	2.16	95	3.52	5	0.21	28.1338	2.66676	1.26313	2.11122	0.0347531	0.999779	Ups	2	12798366	12802906	+	BX908750.1	uncharacterized LOC110439470 [Source:NCBI gene%3BAcc:110439470]	-	-	-	-	-
ENSDARG00000117407	4865	27	0.47	30	0.57	132	2.12	138	2.42	983	15.63	8	0.14	196.235	2.58715	1.22568	2.11079	0.0347905	0.999779	Ups	5	13603536	13616296	+	AL954191.2	uncharacterized LOC101885516 [Source:NCBI gene%3BAcc:101885516]	-	-	-	-	-
ENSDARG00000075826	3920	0	0	3	0.07	59	1.18	2	0.04	0	0	1	0.02	8.77374	-4.05011	1.92017	-2.10925	0.0349233	0.999779	Down	17	43889371	43920385	+	msh4	mutS homolog 4 [Source:ZFIN%3BAcc:ZDB-GENE-131121-643]	GO:0007292:female gamete generation;GO:0006298:mismatch repair;GO:0001541:ovarian follicle development;GO:0007131:reciprocal meiotic recombination;GO:0000712:resolution of meiotic recombination intermediates;GO:0007283:spermatogenesis;GO:0007129:synapsis;	GO:0032300:mismatch repair complex;GO:0000228:nuclear chromosome;GO:0005634:nucleus;GO:0005713:recombination nodule;GO:0000795:synaptonemal complex;	GO:0005524:ATP binding;GO:0003677:DNA binding;GO:0008094:DNA-dependent ATPase activity;GO:0030983:mismatched DNA binding;	K08740	-
ENSDARG00000041873	1164	10	0.72	17	1.34	41	2.76	317	23.19	39	2.59	7	0.53	76.2403	2.62518	1.24495	2.10867	0.0349727	0.999779	Ups	20	38831588	38836161	-	si:dkey-221h15.4	si:dkey-221h15.4 [Source:ZFIN%3BAcc:ZDB-GENE-041014-340]	GO:0043616:keratinocyte proliferation;GO:0035067:negative regulation of histone acetylation;GO:0000122:negative regulation of transcription from RNA polymerase II promoter;GO:0031065:positive regulation of histone deacetylation;GO:0042574:retinal metabolic process;GO:0042572:retinol metabolic process;	GO:0005783:endoplasmic reticulum;GO:0005789:endoplasmic reticulum membrane;GO:0016021:integral component of membrane;GO:0005811:lipid particle;GO:0005634:nucleus;GO:0017053:transcriptional repressor complex;	GO:0033613:activating transcription factor binding;GO:0004745:retinol dehydrogenase activity;GO:0003714:transcription corepressor activity;GO:0008134:transcription factor binding;	K15734	;ko00830 Retinol metabolism;ko01240 Biosynthesis of cofactors;
ENSDARG00000086288	2367	96	3.42	40	1.56	90	2.98	29	1.04	21	0.69	37	1.37	49.8824	-1.39417	0.661561	-2.1074	0.0350831	0.999779	Down	18	39434589	39473055	-	scg3	secretogranin III [Source:NCBI gene%3BAcc:393730]	-	GO:0005576:extracellular region;GO:0030658:transport vesicle membrane;	-	-	-
ENSDARG00000060482	2363	6	0.21	5	0.19	8	0.26	6	0.22	16	0.52	84	3.1	18.6839	2.33267	1.10696	2.10728	0.0350937	0.999779	Ups	9	53909566	54001502	-	mid1	midline 1 [Source:ZFIN%3BAcc:ZDB-GENE-110411-205]	GO:0060333:interferon-gamma-mediated signaling pathway;GO:0000226:microtubule cytoskeleton organization;GO:0007026:negative regulation of microtubule depolymerization;GO:0007389:pattern specification process;GO:0032874:positive regulation of stress-activated MAPK cascade;GO:0035372:protein localization to microtubule;	GO:0005829:cytosol;GO:0005874:microtubule;GO:0005875:microtubule associated complex;GO:0005819:spindle;	GO:0042802:identical protein binding;GO:0008017:microtubule binding;GO:0051219:phosphoprotein binding;GO:0046982:protein heterodimerization activity;GO:0042803:protein homodimerization activity;GO:0016740:transferase activity;GO:0031625:ubiquitin protein ligase binding;GO:0008270:zinc ion binding;	K08285	;ko04120 Ubiquitin mediated proteolysis;
ENSDARG00000045955	1359	0	0	0	0	0	0	6	0.38	1	0.06	5	0.32	1.98458	4.42508	2.10047	2.10671	0.0351426	0.999779	Ups	5	66282256	66301142	-	prlrb	prolactin receptor b [Source:ZFIN%3BAcc:ZDB-GENE-070705-155]	-	GO:0016021:integral component of membrane;	GO:0046872:metal ion binding;GO:0004925:prolactin receptor activity;	-	-
ENSDARG00000096702	1345	45	2.82	0	0	0	0	0	0	0	0	1	0.06	7.57744	-5.46074	2.5921	-2.10669	0.0351446	0.999779	Down	20	52299192	52303074	+	CU550702.1	-	-	-	-	-	-
ENSDARG00000070705	1519	4	0.22	1	0.06	8	0.41	13	0.73	15	0.76	27	1.55	10.3954	2.10587	0.999729	2.10645	0.0351657	0.999779	Ups	19	24123409	24125457	-	zgc:64022	zgc:64022 [Source:ZFIN%3BAcc:ZDB-GENE-040426-1340]	-	-	-	K17198	-
ENSDARG00000099382	2170	23	0.89	4	0.17	112	4.04	389	15.26	268	9.56	14	0.56	132.096	2.55734	1.21619	2.10274	0.0354883	0.999779	Ups	4	38547203	38564071	+	si:ch211-209n20.1	si:ch211-209n20.1 [Source:ZFIN%3BAcc:ZDB-GENE-070705-98]	GO:0071346:cellular response to interferon-gamma;GO:0042742:defense response to bacterium;GO:0006955:immune response;	-	GO:0005525:GTP binding;GO:0003924:GTPase activity;	-	-
ENSDARG00000103195	1887	28	1.25	37	1.81	136	5.64	278	12.54	734	30.1	10	0.46	188.953	2.39465	1.13995	2.10067	0.03567	0.999779	Ups	6	3934738	3956580	+	dync1i2b	dynein%2C cytoplasmic 1%2C intermediate chain 2b [Source:ZFIN%3BAcc:ZDB-GENE-090121-1]	GO:0007018:microtubule-based movement;	GO:0005868:cytoplasmic dynein complex;	GO:0045504:dynein heavy chain binding;GO:0045503:dynein light chain binding;	K10415	;ko04145 Phagosome;ko04962 Vasopressin-regulated water reabsorption;ko05132 Salmonella infection;
ENSDARG00000102776	697	3	0.36	354	46.76	32	3.59	32	3.91	26	2.89	5	0.63	91.5413	-2.96184	1.41092	-2.09923	0.0357971	0.999779	Down	7	7806682	7810348	-	cxcl19	chemokine (C-X-C motif) ligand 19 [Source:ZFIN%3BAcc:ZDB-GENE-140708-2]	-	-	-	-	-
ENSDARG00000035151	1878	0	0	0	0	1	0.04	28	1.27	1	0.04	0	0	5.48447	4.89739	2.33461	2.09774	0.0359285	0.999779	Ups	5	61630696	61638125	-	drll.1	draculin-like%2C tandem duplicate 1 [Source:ZFIN%3BAcc:ZDB-GENE-060531-124]	GO:0001702:gastrulation with mouth forming second;	GO:0005634:nucleus;	GO:0003677:DNA binding;GO:0046872:metal ion binding;	K09228	;ko05168 Herpes simplex virus 1 infection;
ENSDARG00000087176	3341	4	0.1	7	0.19	6	0.14	30	0.76	80	1.85	2	0.05	20.3304	2.57526	1.2298	2.09405	0.0362556	0.999779	Ups	15	16099458	16121496	-	rskra	ribosomal protein S6 kinase related a [Source:ZFIN%3BAcc:ZDB-GENE-130103-8]	-	-	GO:0005524:ATP binding;GO:0004674:protein serine/threonine kinase activity;	K17529	-
ENSDARG00000004322	6103	0	0	1	0.02	1	0.01	6	0.08	5	0.06	9	0.13	3.48427	3.2443	1.55134	2.09129	0.0365024	0.999779	Ups	3	56882832	56896702	-	ush1ga	Usher syndrome 1Ga (autosomal recessive) [Source:ZFIN%3BAcc:ZDB-GENE-131120-173]	GO:0050957:equilibrioception;GO:0042472:inner ear morphogenesis;GO:0060122:inner ear receptor stereocilium organization;GO:0045494:photoreceptor cell maintenance;GO:0050953:sensory perception of light stimulus;GO:0007605:sensory perception of sound;	GO:0015629:actin cytoskeleton;GO:0036064:ciliary basal body;GO:0005829:cytosol;GO:0032391:photoreceptor connecting cilium;GO:0001917:photoreceptor inner segment;GO:0005886:plasma membrane;	GO:0042802:identical protein binding;GO:0042803:protein homodimerization activity;GO:0030507:spectrin binding;	-	-
ENSDARG00000045936	7064	2	0.02	0	0	3	0.03	25	0.3	6	0.07	4	0.05	6.81284	3.00263	1.43728	2.08911	0.0366979	0.999779	Ups	7	15871156	15900606	+	pax6b	paired box 6b [Source:ZFIN%3BAcc:ZDB-GENE-001031-1]	GO:0007275:multicellular organismal development;GO:0006355:regulation of transcription, DNA-templated;	GO:0005634:nucleus;	GO:0043565:sequence-specific DNA binding;	K08031	;ko04550 Signaling pathways regulating pluripotency of stem cells;ko04950 Maturity onset diabetes of the young;
ENSDARG00000112301	2683	58	1.82	30	1.03	7	0.2	2	0.06	13	0.37	0	0	19.2081	-2.9075	1.39287	-2.08741	0.036851	0.999779	Down	22	4782287	4813345	-	CU570881.2	-	-	-	-	-	-
ENSDARG00000036104	3610	4	0.09	2	0.05	3	0.07	8	0.19	11	0.24	25	0.6	8.17103	2.18433	1.04653	2.08722	0.0368685	0.999779	Ups	19	24640467	24745894	-	myo1g	myosin IG [Source:ZFIN%3BAcc:ZDB-GENE-060503-562]	GO:0038096:Fc-gamma receptor signaling pathway involved in phagocytosis;GO:0002456:T cell mediated immunity;GO:0072678:T cell migration;	GO:0042995:cell projection;GO:0016459:myosin complex;GO:0001891:phagocytic cup;GO:0005886:plasma membrane;	GO:0003779:actin binding;GO:0005524:ATP binding;GO:0005516:calmodulin binding;GO:0003774:motor activity;GO:0005547:phosphatidylinositol-3,4,5-trisphosphate binding;GO:0043325:phosphatidylinositol-3,4-bisphosphate binding;GO:0005546:phosphatidylinositol-4,5-bisphosphate binding;	K10356	;ko05130 Pathogenic Escherichia coli infection;
ENSDARG00000114345	5670	1	0.01	101	1.64	33	0.46	4	0.06	16	0.22	3	0.05	29.7274	-2.90629	1.39243	-2.08722	0.0368687	0.999779	Down	7	4193869	4202167	+	si:dkey-28d5.5	si:dkey-28d5.5 [Source:ZFIN%3BAcc:ZDB-GENE-060503-165]	-	-	-	-	-
ENSDARG00000045516	3261	107	2.76	1	0.03	28	0.67	2	0.05	10	0.24	9	0.24	24.6141	-2.78008	1.33209	-2.08701	0.036887	0.999779	Down	4	25187912	25215968	-	itih2	inter-alpha-trypsin inhibitor heavy chain 2 [Source:ZFIN%3BAcc:ZDB-GENE-040426-1942]	GO:0030212:hyaluronan metabolic process;	GO:0005615:extracellular space;	GO:0004867:serine-type endopeptidase inhibitor activity;	K19015	-
ENSDARG00000040284	3551	13	0.31	36	0.93	91	2.01	67	1.61	633	13.79	30	0.74	129.547	2.31531	1.10959	2.08664	0.0369204	0.999779	Ups	16	24819118	24832038	-	si:dkey-79d12.5	si:dkey-79d12.5 [Source:ZFIN%3BAcc:ZDB-GENE-131127-429]	-	-	-	K14443	;ko03018 RNA degradation;
ENSDARG00000077169	3128	105	2.83	95	2.8	373	9.33	806	21.94	2641	65.33	7	0.2	616.974	2.62621	1.26004	2.08423	0.037139	0.999779	Ups	14	11450498	11456724	-	si:ch211-153b23.4	si:ch211-153b23.4 [Source:ZFIN%3BAcc:ZDB-GENE-030131-7332]	-	-	-	-	-
ENSDARG00000110658	1870	0	0	1	0.05	3	0.13	19	0.87	30	1.24	0	0	8.45561	3.67263	1.76305	2.0831	0.0372417	0.999779	Ups	4	42065748	42074960	-	zgc:174696	zgc:174696 [Source:ZFIN%3BAcc:ZDB-GENE-030131-2836]	-	-	-	K09228	;ko05168 Herpes simplex virus 1 infection;
ENSDARG00000067605	2511	60	2.01	87	3.19	110	3.43	217	7.36	340	10.48	122	4.24	149.867	1.31992	0.633982	2.08196	0.0373464	0.999779	Ups	5	61931337	61942482	-	napaa	N-ethylmaleimide-sensitive factor attachment protein%2C alpha a [Source:ZFIN%3BAcc:ZDB-GENE-060531-160]	GO:0045176:apical protein localization;GO:0007420:brain development;GO:0006886:intracellular protein transport;GO:0030182:neuron differentiation;GO:0032781:positive regulation of ATPase activity;GO:0032984:macromolecular complex disassembly;GO:0010807:regulation of synaptic vesicle priming;GO:0035494:SNARE complex disassembly;GO:0035249:synaptic transmission, glutamatergic;GO:0016082:synaptic ves…	GO:0043209:myelin sheath;GO:0005886:plasma membrane;GO:0098794:postsynapse;GO:0098793:presynapse;GO:0031201:SNARE complex;GO:0070044:synaptobrevin 2-SNAP-25-syntaxin-1a complex;GO:0005774:vacuolar membrane;	GO:0044877:macromolecular complex binding;GO:0000149:SNARE binding;GO:0005483:soluble NSF attachment protein activity;GO:0019905:syntaxin binding;	-	-
ENSDARG00000101535	2356	14	0.5	105	4.1	108	3.59	18	0.65	0	0	18	0.67	44.8863	-2.71288	1.3037	-2.08091	0.0374421	0.999779	Down	20	484256	487783	-	col10a1b	collagen%2C type X%2C alpha 1b [Source:ZFIN%3BAcc:ZDB-GENE-030131-7079]	GO:0030198:extracellular matrix organization;GO:0001501:skeletal system development;	GO:0005581:collagen trimer;GO:0005788:endoplasmic reticulum lumen;GO:0031012:extracellular matrix;GO:0005576:extracellular region;GO:0005615:extracellular space;	GO:0005201:extracellular matrix structural constituent;GO:0030020:extracellular matrix structural constituent conferring tensile strength;GO:0046872:metal ion binding;	-	-
ENSDARG00000117300	3559	0	0	4	0.1	0	0	3	0.07	54	1.17	8	0.2	10.3502	3.562	1.71751	2.07394	0.0380853	0.999779	Ups	18	38859119	38865170	-	BX936456.1	-	-	-	-	-	-
ENSDARG00000076127	6580	1	0.01	2	0.03	0	0	54	0.7	0	0	2	0.03	10.938	4.18244	2.01789	2.07269	0.0382015	0.999779	Ups	13	12299997	12375593	+	gabrb1	gamma-aminobutyric acid type A receptor beta1 subunit [Source:ZFIN%3BAcc:ZDB-GENE-090313-230]	GO:0071420:cellular response to histamine;GO:0021954:central nervous system neuron development;GO:0007268:synaptic transmission;GO:1902476:chloride transmembrane transport;GO:0007214:gamma-aminobutyric acid signaling pathway;GO:0034220:ion transmembrane transport;GO:0006811:ion transport;GO:0050877:neurological system process;GO:0042698:ovulation cycle;GO:0042391:regulation of membrane potential;…	GO:0030054:cell junction;GO:0034707:chloride channel complex;GO:0005737:cytoplasm;GO:0030425:dendrite;GO:1902711:GABA-A receptor complex;GO:0005887:integral component of plasma membrane;GO:0043005:neuron projection;GO:0005635:nuclear envelope;GO:0005886:plasma membrane;GO:0045211:postsynaptic membrane;GO:0045202:synapse;	GO:0050811:GABA receptor binding;GO:0004890:GABA-A receptor activity;GO:0022851:GABA-gated chloride ion channel activity;GO:0015276:ligand-gated ion channel activity;	K05181	;ko04080 Neuroactive ligand-receptor interaction;ko04723 Retrograde endocannabinoid signaling;ko04726 Serotonergic synapse;ko04727 GABAergic synapse;ko05032 Morphine addiction;ko05033 Nicotine addiction;
ENSDARG00000028780	2092	0	0	4	0.18	1	0.04	9	0.37	43	1.59	3	0.13	9.28938	3.14741	1.51857	2.07261	0.0382085	0.999779	Ups	21	19517492	19520320	+	gzmk	granzyme K [Source:ZFIN%3BAcc:ZDB-GENE-091204-352]	-	-	-	K08663	-
ENSDARG00000092801	335	2	0.5	13	3.57	0	0	0	0	0	0	0	0	3.1396	-5.16259	2.4928	-2.071	0.0383589	0.999779	Down	16	22009140	22012320	-	CR855277.2	RIIa domain-containing protein 1-like [Source:NCBI gene%3BAcc:100536995]	-	-	-	-	-
ENSDARG00000045705	861	1	0.1	1	0.11	3	0.27	7	0.69	15	1.35	7	0.71	5.24263	2.50654	1.21087	2.07003	0.0384499	0.999779	Ups	4	9609905	9611875	+	meig1	meiosis/spermiogenesis associated 1 [Source:NCBI gene%3BAcc:541343]	GO:0030154:cell differentiation;GO:0007283:spermatogenesis;	GO:0005634:nucleus;	-	-	-
ENSDARG00000100115	12711	14	0.09	6	0.04	31	0.19	30	0.2	26	0.16	141	0.97	37.346	1.95563	0.945444	2.06848	0.0385947	0.999779	Ups	11	34633392	34720630	-	dnah1	dynein%2C axonemal%2C heavy chain 1 [Source:ZFIN%3BAcc:ZDB-GENE-081015-3]	GO:0003341:cilium movement;GO:0060294:cilium movement involved in cell motility;GO:0060285:cilium-dependent cell motility;GO:0003351:epithelial cilium movement;GO:0030317:sperm motility;GO:0036159:inner dynein arm assembly;GO:0007018:microtubule-based movement;GO:0007288:sperm axoneme assembly;	GO:0005858:axonemal dynein complex;GO:0005930:axoneme;GO:0030286:dynein complex;GO:0036156:inner dynein arm;GO:0005874:microtubule;GO:0036126:sperm flagellum;	GO:0005524:ATP binding;GO:0008569:ATP-dependent microtubule motor activity, minus-end-directed;GO:0045505:dynein intermediate chain binding;GO:0045503:dynein light chain binding;GO:0051959:dynein light intermediate chain binding;GO:0003777:microtubule motor activity;	K10408	;ko05014 Amyotrophic lateral sclerosis;ko05016 Huntington disease;ko05022 Pathways of neurodegeneration - multiple diseases;
ENSDARG00000114211	513	33	5.42	0	0	0	0	0	0	0	0	0	0	5.45061	-5.97509	2.88945	-2.0679	0.0386495	0.999779	Down	17	50044389	50045375	-	FO834825.2	-	-	GO:0005634:nucleus;	GO:0003677:DNA binding;GO:0000981:sequence-specific DNA binding RNA polymerase II transcription factor activity;GO:0046872:metal ion binding;	K09228	;ko05168 Herpes simplex virus 1 infection;
ENSDARG00000068910	5681	75	1.11	121	1.96	40	0.55	6	0.09	1	0.01	45	0.69	51.4698	-2.48434	1.20282	-2.06542	0.0388833	0.999779	Down	5	12100126	12272689	-	nos1	nitric oxide synthase 1 (neuronal) [Source:NCBI gene%3BAcc:60658]	GO:0006527:arginine catabolic process;GO:0045454:cell redox homeostasis;GO:0071363:cellular response to growth factor stimulus;GO:0042738:exogenous drug catabolic process;	GO:0044305:calyx of Held;GO:0005901:caveola;GO:0005737:cytoplasm;GO:0005856:cytoskeleton;	GO:0034618:arginine binding;GO:0046870:cadmium ion binding;GO:0005516:calmodulin binding;GO:0050660:flavin adenine dinucleotide binding;	K13240	;ko00220 Arginine biosynthesis;ko00330 Arginine and proline metabolism;ko01100 Metabolic pathways;ko01110 Biosynthesis of secondary metabolites;ko04020 Calcium signaling pathway;ko04145 Phagosome;ko04371 Apelin signaling pathway;ko04713 Circadian entrainment;ko04730 Long-term depression;ko04926 Relaxin signaling pathway;ko04970 Salivary secretion;ko05010 Alzheimer disease;ko05014 Amyotrophic late…
ENSDARG00000073948	896	2	0.19	0	0	2	0.17	4	0.38	11	0.95	13	1.27	4.79759	2.76684	1.33992	2.06492	0.0389302	0.999779	Ups	8	24714733	24730185	-	prok1	prokineticin 1 [Source:ZFIN%3BAcc:ZDB-GENE-070928-34]	GO:0000187:activation of MAPK activity;GO:0001525:angiogenesis;GO:0007623:circadian rhythm;GO:0007186:G-protein coupled receptor signaling pathway;GO:0051781:positive regulation of cell division;GO:0008284:positive regulation of cell proliferation;GO:0045765:regulation of angiogenesis;	GO:0005576:extracellular region;	GO:0001664:G-protein coupled receptor binding;GO:0008083:growth factor activity;	-	-
ENSDARG00000071261	2625	58	1.86	35	1.23	15	0.45	6	0.19	19	0.56	7	0.23	23.9415	-1.96165	0.950391	-2.06404	0.0390135	0.999779	Down	23	6141541	6156179	+	zmp:0000001139	zmp:0000001139 [Source:ZFIN%3BAcc:ZDB-GENE-140106-99]	-	-	-	-	-
ENSDARG00000017314	5031	5	0.08	6	0.11	6	0.09	8	0.14	4	0.06	109	1.89	20.7424	2.6354	1.27689	2.06392	0.0390256	0.999779	Ups	22	7439186	7447391	+	cela1.6	chymotrypsin like elastase family member 1%2C tandem duplicate 6 [Source:ZFIN%3BAcc:ZDB-GENE-040808-55]	-	GO:0005576:extracellular region;	GO:0046872:metal ion binding;GO:0004252:serine-type endopeptidase activity;	K01326	-
ENSDARG00000100007	3081	8	0.22	0	0	9	0.23	0	0	0	0	0	0	2.48196	-4.85152	2.35073	-2.06384	0.0390333	0.999779	Down	20	52389858	52447533	+	arhgap39	Rho GTPase activating protein 39 [Source:ZFIN%3BAcc:ZDB-GENE-041014-247]	GO:0051056:regulation of small GTPase mediated signal transduction;GO:0007165:signal transduction;	GO:0005737:cytoplasm;GO:0005856:cytoskeleton;GO:0005829:cytosol;GO:0005634:nucleus;	GO:0005096:GTPase activator activity;	-	-
ENSDARG00000112943	2151	4	0.16	7	0.3	20	0.73	56	2.22	82	2.95	6	0.24	27.842	2.27098	1.1004	2.06377	0.0390396	0.999779	Ups	1	58639497	58664854	-	adgre5b.3	adhesion G protein-coupled receptor E5b%2C duplicate 3 [Source:ZFIN%3BAcc:ZDB-GENE-121214-275]	-	-	-	K08446	-
ENSDARG00000105194	772	8	0.87	3	0.36	3	0.3	0	0	0	0	1	0.11	2.50131	-3.79868	1.84107	-2.06329	0.0390847	0.999779	Down	7	73423306	73426467	-	AL929105.1	-	-	-	-	-	-
ENSDARG00000008849	7179	48	0.56	3	0.04	25	0.27	8	0.09	2	0.02	1	0.01	13.7219	-2.65489	1.28745	-2.06213	0.0391949	0.999779	Down	18	6319447	6406609	+	ptprq	protein tyrosine phosphatase receptor type Q [Source:ZFIN%3BAcc:ZDB-GENE-050419-183]	GO:0045598:regulation of fat cell differentiation;	GO:0016021:integral component of membrane;	GO:0004725:protein tyrosine phosphatase activity;	K16910	-
ENSDARG00000099860	2970	131	3.72	9445	292.79	799	21.05	1240	35.55	106	2.76	287	8.44	2453.32	-2.91281	1.41433	-2.05949	0.0394471	0.999779	Down	25	29160102	29196558	+	pkmb	pyruvate kinase M1/2b [Source:ZFIN%3BAcc:ZDB-GENE-040801-230]	-	-	GO:0005524:ATP binding;GO:0016301:kinase activity;GO:0000287:magnesium ion binding;GO:0030955:potassium ion binding;GO:0004743:pyruvate kinase activity;	K00873	;ko00010 Glycolysis / Gluconeogenesis;ko00230 Purine metabolism;ko00620 Pyruvate metabolism;ko01100 Metabolic pathways;ko01110 Biosynthesis of secondary metabolites;ko01120 Microbial metabolism in diverse environments;ko01200 Carbon metabolism;ko01230 Biosynthesis of amino acids;ko01240 Biosynthesis of cofactors;ko04922 Glucagon signaling pathway;ko04930 Type II diabetes mellitus;ko05165 Human pa…
ENSDARG00000060695	5370	55	0.86	137	2.35	236	3.44	312	4.95	463	6.67	314	5.11	239.272	1.29972	0.631241	2.059	0.0394946	0.999779	Ups	21	37090585	37111264	+	znf346	zinc finger protein 346 [Source:NCBI gene%3BAcc:560756]	-	GO:0005737:cytoplasm;GO:0005634:nucleus;	GO:0003725:double-stranded RNA binding;GO:0008270:zinc ion binding;	K00750	;ko00500 Starch and sucrose metabolism;ko01100 Metabolic pathways;ko01110 Biosynthesis of secondary metabolites;
ENSDARG00000020084	8356	10	0.1	5	0.06	24	0.22	142	1.45	29	0.27	7	0.07	37.4434	2.42642	1.1789	2.05821	0.0395698	0.999779	Ups	16	31530762	31598771	-	tg	thyroglobulin [Source:ZFIN%3BAcc:ZDB-GENE-030519-1]	-	-	-	K10809	;ko04918 Thyroid hormone synthesis;ko05320 Autoimmune thyroid disease;
ENSDARG00000005716	2652	1	0.03	1	0.03	0	0	13	0.42	7	0.2	2	0.07	4.09764	3.39137	1.6519	2.05302	0.0400709	0.999779	Ups	20	33792156	33806508	+	olfml2ba	olfactomedin-like 2Ba [Source:ZFIN%3BAcc:ZDB-GENE-041014-329]	GO:0030198:extracellular matrix organization;	GO:0031012:extracellular matrix;GO:0005615:extracellular space;	GO:0050840:extracellular matrix binding;	-	-
ENSDARG00000117808	616	227	31.04	19	2.84	35	4.45	19	2.63	32	4.02	2	0.28	54.5429	-2.45356	1.1951	-2.05301	0.0400716	0.999779	Down	12	45368547	45379131	-	CABZ01068366.1	-	-	-	-	-	-
ENSDARG00000114332	4889	1	0.02	26	0.49	2	0.03	1	0.02	2	0.03	0	0	6.51548	-3.66327	1.78643	-2.05061	0.0403049	0.999779	Down	4	68181039	68186022	-	CT573234.1	-	-	-	-	-	-
ENSDARG00000087198	1262	2	0.13	13	0.95	19	1.18	11	0.74	175	10.73	23	1.59	36.1449	2.45548	1.19764	2.05026	0.040339	0.999779	Ups	19	12915498	12927089	+	cthrc1a	collagen triple helix repeat containing 1a [Source:ZFIN%3BAcc:ZDB-GENE-040808-22]	GO:0016477:cell migration;GO:0090103:cochlea morphogenesis;GO:0090177:establishment of planar polarity involved in neural tube closure;GO:0060122:inner ear receptor stereocilium organization;GO:0090090:negative regulation of canonical Wnt signaling pathway;GO:0043932:ossification involved in bone remodeling;GO:0045669:positive regulation of osteoblast differentiation;GO:0033690:positive regulatio…	GO:0005581:collagen trimer;GO:0005737:cytoplasm;GO:0031012:extracellular matrix;GO:0005615:extracellular space;	GO:0005109:frizzled binding;GO:0017147:Wnt-protein binding;	-	-
ENSDARG00000077407	2313	93	3.39	122	4.86	194	6.56	157	5.78	1545	51.68	92	3.47	331.568	1.98876	0.970393	2.04944	0.0404191	0.999779	Ups	19	34091552	34117056	-	si:dkey-184p18.2	si:dkey-184p18.2 [Source:NCBI gene%3BAcc:768134]	-	-	-	-	-
ENSDARG00000097065	704	0	0	2	0.26	27	3	1	0.12	0	0	0	0	4.10013	-4.54798	2.22105	-2.04767	0.0405923	0.999779	Down	15	17251191	17255307	+	si:ch73-223p23.2	si:ch73-223p23.2 [Source:ZFIN%3BAcc:ZDB-GENE-131121-616]	-	-	-	-	-
ENSDARG00000116789	1083	0	0	3	0.26	1	0.07	28	2.2	9	0.64	2	0.16	7.57332	3.20835	1.56698	2.04748	0.0406114	0.999779	Ups	24	29961238	29963858	-	CR352310.2	-	-	-	-	-	-
ENSDARG00000024492	3866	119	2.59	6	0.14	1	0.02	6	0.13	6	0.12	0	0	23.0608	-3.42224	1.67296	-2.04561	0.0407944	0.999779	Down	19	38422059	38467554	+	col9a2	procollagen%2C type IX%2C alpha 2 [Source:ZFIN%3BAcc:ZDB-GENE-030131-9786]	GO:0001568:blood vessel development;GO:0007155:cell adhesion;GO:0016477:cell migration;GO:0032964:collagen biosynthetic process;GO:0030199:collagen fibril organization;GO:0030198:extracellular matrix organization;GO:0048592:eye morphogenesis;GO:0003007:heart morphogenesis;GO:0045112:integrin biosynthetic process;GO:1903225:negative regulation of endodermal cell differentiation;GO:0051128:regulati…	GO:0005604:basement membrane;GO:0005581:collagen trimer;GO:0005588:collagen type V trimer;GO:0031012:extracellular matrix;GO:0005615:extracellular space;	GO:0005201:extracellular matrix structural constituent;GO:0008201:heparin binding;GO:0048407:platelet-derived growth factor binding;GO:0043394:proteoglycan binding;	K08131	;ko04151 PI3K-Akt signaling pathway;ko04510 Focal adhesion;ko04512 ECM-receptor interaction;ko04974 Protein digestion and absorption;ko05165 Human papillomavirus infection;
ENSDARG00000099328	1332	0	0	0	0	0	0	1	0.06	22	1.28	0	0	3.35132	5.19432	2.54158	2.04374	0.0409797	0.999779	Ups	4	71617362	71624500	+	BX927130.1	-	-	-	-	K12800	;ko04217 Necroptosis;ko04621 NOD-like receptor signaling pathway;ko04625 C-type lectin receptor signaling pathway;ko05130 Pathogenic Escherichia coli infection;ko05131 Shigellosis;ko05132 Salmonella infection;ko05133 Pertussis;ko05135 Yersinia infection;ko05164 Influenza A;ko05171 Coronavirus disease - COVID-19;
ENSDARG00000092381	1969	0	0	25	1.17	0	0	0	0	0	0	0	0	5.40243	-5.95436	2.91401	-2.04336	0.0410171	0.999779	Down	8	22404981	22476458	+	zgc:153759	zgc:153759 [Source:ZFIN%3BAcc:ZDB-GENE-060825-148]	-	-	-	K05152	;ko04060 Cytokine-cytokine receptor interaction;ko04061 Viral protein interaction with cytokine and cytokine receptor;ko05168 Herpes simplex virus 1 infection;
ENSDARG00000075428	1154	0	0	7	0.56	8	0.54	0	0	0	0	0	0	2.54433	-4.86966	2.38512	-2.04168	0.0411829	0.999779	Down	3	21999006	22000986	-	BX547992.1	-	-	-	-	-	-
ENSDARG00000093921	2549	0	0	7	0.25	8	0.25	0	0	0	0	0	0	2.54433	-4.86966	2.38512	-2.04168	0.0411829	0.999779	Down	5	30723129	30727648	+	BX276103.2	-	-	-	-	-	-
ENSDARG00000041431	3753	0	0	0	0	1	0.02	3	0.07	15	0.31	1	0.02	2.99022	4.00523	1.9624	2.04099	0.0412522	0.999779	Ups	18	19006063	19039960	+	slc24a1	solute carrier family 24 member 1 [Source:ZFIN%3BAcc:ZDB-GENE-060503-191]	GO:0070588:calcium ion transmembrane transport;GO:0006874:cellular calcium ion homeostasis;GO:0060292:long term synaptic depression;GO:0060291:long-term synaptic potentiation;GO:0050896:response to stimulus;GO:0007601:visual perception;GO:0007612:learning;GO:0007613:memory;	GO:0005887:integral component of plasma membrane;GO:0031226:intrinsic component of plasma membrane;	GO:0005262:calcium channel activity;GO:0008273:calcium, potassium:sodium antiporter activity;GO:0015293:symporter activity;GO:0046983:protein dimerization activity;	K13749	;ko04744 Phototransduction;
ENSDARG00000019392	2634	35	1.12	22	0.77	108	3.21	221	7.14	224	6.58	50	1.66	105.064	1.71413	0.840213	2.04012	0.0413384	0.999779	Ups	3	17251542	17331919	+	stat5a	signal transducer and activator of transcription 5a [Source:ZFIN%3BAcc:ZDB-GENE-030820-2]	GO:0006953:acute-phase response;GO:0071364:cellular response to epidermal growth factor stimulus;GO:0071363:cellular response to growth factor stimulus;GO:0032870:cellular response to hormone stimulus;GO:0019221:cytokine-mediated signaling pathway;GO:0006952:defense response;GO:0046543:development of secondary female sexual characteristics;GO:0046544:development of secondary male sexual character…	GO:0005737:cytoplasm;GO:0005829:cytosol;GO:0005654:nucleoplasm;GO:0005634:nucleus;	GO:0003682:chromatin binding;GO:0003677:DNA binding;GO:0001228:RNA polymerase II transcription regulatory region sequence-specific DNA binding transcription factor activity involved in positive regulation of transcription;GO:0003700:sequence-specific DNA binding transcription factor activity;GO:0003690:double-stranded DNA binding;GO:0035259:glucocorticoid receptor binding;GO:0046983:protein dimer…	K11224	;ko04012 ErbB signaling pathway;ko04062 Chemokine signaling pathway;ko04217 Necroptosis;ko04630 JAK-STAT signaling pathway;ko04658 Th1 and Th2 cell differentiation;ko04659 Th17 cell differentiation;ko04917 Prolactin signaling pathway;ko04933 AGE-RAGE signaling pathway in diabetic complications;ko04935 Growth hormone synthesis, secretion and action;ko05161 Hepatitis B;ko05162 Measles;ko05166 Human…
ENSDARG00000087102	1323	0	0	0	0	0	0	0	0	38	2.22	0	0	5.46715	5.89846	2.89139	2.04001	0.0413497	0.999779	Ups	24	38648885	38657683	-	si:ch1073-164k15.3	si:ch1073-164k15.3 [Source:ZFIN%3BAcc:ZDB-GENE-131119-59]	-	-	-	-	-
ENSDARG00000102221	947	51	4.54	21	2.04	48	3.97	8	0.72	18	1.47	18	1.66	25.8365	-1.51418	0.742278	-2.03991	0.0413595	0.999779	Down	7	18993828	19003504	-	HACD4	si:ch73-41h24.1 [Source:ZFIN%3BAcc:ZDB-GENE-030131-3627]	-	-	-	K10703	;ko00062 Fatty acid elongation;ko01040 Biosynthesis of unsaturated fatty acids;ko01100 Metabolic pathways;ko01110 Biosynthesis of secondary metabolites;ko01212 Fatty acid metabolism;
ENSDARG00000097572	2101	4	0.16	4	0.18	5	0.19	0	0	0	0	1	0.04	2.31463	-3.67753	1.80394	-2.03861	0.0414892	0.999779	Down	6	51009981	51101834	-	ptprt	protein tyrosine phosphatase receptor type T [Source:ZFIN%3BAcc:ZDB-GENE-101028-4]	GO:0071354:cellular response to interleukin-6;GO:0007156:homophilic cell adhesion via plasma membrane adhesion molecules;GO:0030336:negative regulation of cell migration;GO:0035335:peptidyl-tyrosine dephosphorylation;GO:1990264:peptidyl-tyrosine dephosphorylation involved in inactivation of protein kinase activity;GO:0006470:protein dephosphorylation;GO:0050807:regulation of synapse organization;…	GO:0009986:cell surface;GO:0005887:integral component of plasma membrane;GO:0005886:plasma membrane;	GO:0051393:alpha-actinin binding;GO:0045294:alpha-catenin binding;GO:0008013:beta-catenin binding;GO:0045296:cadherin binding;GO:0070097:delta-catenin binding;GO:0045295:gamma-catenin binding;GO:0042803:protein homodimerization activity;GO:0019903:protein phosphatase binding;GO:0004725:protein tyrosine phosphatase activity;GO:0097677:STAT family protein binding;GO:0016790:thiolester hydrolase act…	K13297	-
ENSDARG00000086956	825	467	47.68	3	0.33	697	66.12	2	0.21	4	0.38	130	13.76	187.435	-3.08289	1.514	-2.03626	0.0417247	0.999779	Down	20	54027778	54029122	+	si:dkey-241l7.3	si:dkey-241l7.3 [Source:ZFIN%3BAcc:ZDB-GENE-041014-239]	-	-	-	-	-
ENSDARG00000010276	2556	89	2.93	122	4.39	275	8.42	172	5.73	2726	82.52	23	0.79	504.067	2.48191	1.21954	2.03513	0.0418379	0.999779	Ups	20	34121818	34127415	-	ptgs2b	prostaglandin-endoperoxide synthase 2b [Source:ZFIN%3BAcc:ZDB-GENE-041014-323]	GO:0019371:cyclooxygenase pathway;GO:0006954:inflammatory response;GO:0001516:prostaglandin biosynthetic process;GO:0008217:regulation of blood pressure;GO:0006979:response to oxidative stress;	GO:0005737:cytoplasm;GO:0005789:endoplasmic reticulum membrane;	GO:0051213:dioxygenase activity;GO:0020037:heme binding;GO:0046872:metal ion binding;GO:0004601:peroxidase activity;GO:0004666:prostaglandin-endoperoxide synthase activity;	K11987	;ko00590 Arachidonic acid metabolism;ko01100 Metabolic pathways;ko04064 NF-kappa B signaling pathway;ko04370 VEGF signaling pathway;ko04625 C-type lectin receptor signaling pathway;ko04657 IL-17 signaling pathway;ko04668 TNF signaling pathway;ko04723 Retrograde endocannabinoid signaling;ko04726 Serotonergic synapse;ko04913 Ovarian steroidogenesis;ko04921 Oxytocin signaling pathway;ko04923 Regulat…
ENSDARG00000010347	1574	46	2.46	22	1.29	90	4.47	70	3.79	340	16.71	86	4.77	98.3553	1.6309	0.801677	2.03436	0.0419148	0.999779	Ups	8	20232421	20245892	-	acer1	alkaline ceramidase 1 [Source:NCBI gene%3BAcc:550266]	GO:0046514:ceramide catabolic process;GO:0046512:sphingosine biosynthetic process;	GO:0005783:endoplasmic reticulum;GO:0005789:endoplasmic reticulum membrane;GO:0016021:integral component of membrane;	GO:0071633:dihydroceramidase activity;GO:0046872:metal ion binding;	K01441	;ko00600 Sphingolipid metabolism;ko01100 Metabolic pathways;ko04071 Sphingolipid signaling pathway;
ENSDARG00000051873	1961	0	0	0	0	0	0	12	0.52	0	0	4	0.18	2.81271	4.92846	2.43082	2.02749	0.0426128	0.999779	Ups	25	21800397	21822426	-	ahcyl2a	adenosylhomocysteinase like 2a [Source:ZFIN%3BAcc:ZDB-GENE-070112-1522]	GO:0006730:one-carbon metabolic process;GO:0033353:S-adenosylmethionine cycle;	GO:0005829:cytosol;GO:0005783:endoplasmic reticulum;GO:0043005:neuron projection;	GO:0016787:hydrolase activity;	K01251	;ko00270 Cysteine and methionine metabolism;ko01100 Metabolic pathways;
ENSDARG00000004953	2291	29	1.07	152	6.11	236	8.06	245	9.1	2178	73.56	33	1.26	431.804	2.41811	1.19356	2.02597	0.0427682	0.999779	Ups	1	7574351	7603734	-	mxb	myxovirus (influenza) resistance B [Source:NCBI gene%3BAcc:360143]	GO:0003374:dynamin polymerization involved in mitochondrial fission;GO:0061025:membrane fusion;GO:0000266:mitochondrial fission;GO:0009615:response to virus;	GO:0005737:cytoplasm;GO:0016020:membrane;GO:0031966:mitochondrial membrane;	GO:0005525:GTP binding;GO:0003924:GTPase activity;GO:0008017:microtubule binding;	K14754	;ko05160 Hepatitis C;ko05162 Measles;ko05164 Influenza A;ko05165 Human papillomavirus infection;ko05171 Coronavirus disease - COVID-19;
ENSDARG00000060610	5325	3	0.05	10	0.17	8	0.12	9	0.14	22	0.32	80	1.31	20.1114	2.17732	1.07583	2.02386	0.042985	0.999779	Ups	7	63324888	63570206	+	pcdh7b	protocadherin 7b [Source:ZFIN%3BAcc:ZDB-GENE-081104-299]	GO:0007155:cell adhesion;GO:0007156:homophilic cell adhesion via plasma membrane adhesion molecules;GO:0002576:platelet degranulation;	GO:0005887:integral component of plasma membrane;GO:0005886:plasma membrane;GO:0031092:platelet alpha granule membrane;	GO:0005509:calcium ion binding;	K16498	-
ENSDARG00000062575	3518	76	1.82	19	0.5	215	4.78	525	12.71	780	17.16	19	0.47	257.074	2.25805	1.11574	2.02382	0.0429889	0.999779	Ups	3	17346502	17523082	+	si:ch211-210g13.5	si:ch211-210g13.5 [Source:ZFIN%3BAcc:ZDB-GENE-030131-5675]	GO:0002322:B cell proliferation involved in immune response;GO:0002337:B-1a B cell differentiation;GO:0007214:gamma-aminobutyric acid signaling pathway;GO:0032959:inositol trisphosphate biosynthetic process;GO:0035556:intracellular signal transduction;GO:0006629:lipid metabolic process;GO:0050859:negative regulation of B cell receptor signaling pathway;GO:1900122:positive regulation of receptor b…	GO:0005737:cytoplasm;	GO:0050811:GABA receptor binding;GO:0070679:inositol 1,4,5 trisphosphate binding;GO:0004435:phosphatidylinositol phospholipase C activity;	K15370	-
ENSDARG00000101520	1110	2	0.15	28	2.32	14	0.99	2	0.15	4	0.28	3	0.24	9.56855	-2.54682	1.25918	-2.02261	0.0431135	0.999779	Down	1	35332924	35335416	-	CR786582.2	B- and T-lymphocyte attenuator-like [Source:NCBI gene%3BAcc:101883801]	-	-	-	-	-
ENSDARG00000098379	5030	1	0.02	16	0.29	31	0.48	133	2.25	108	1.66	11	0.19	49.5065	2.45696	1.21481	2.02251	0.043124	0.999779	Ups	7	18721547	18730474	-	C7H4orf54	si:dkey-38l22.2 [Source:ZFIN%3BAcc:ZDB-GENE-141216-433]	-	-	-	-	-
ENSDARG00000070511	2765	2	0.06	3	0.1	10	0.28	0	0	0	0	1	0.03	2.41298	-3.76077	1.86243	-2.01928	0.0434583	0.999779	Down	11	25735478	25750060	+	si:dkey-183j2.10	si:dkey-183j2.10 [Source:ZFIN%3BAcc:ZDB-GENE-130530-729]	GO:0050804:regulation of synaptic transmission;GO:0035249:synaptic transmission, glutamatergic;	GO:0030054:cell junction;GO:0016021:integral component of membrane;GO:0005886:plasma membrane;GO:0045211:postsynaptic membrane;	GO:0008066:glutamate receptor activity;GO:0004970:ionotropic glutamate receptor activity;	-	-
ENSDARG00000014652	4911	3	0.05	8	0.15	2	0.03	0	0	1	0.02	0	0	2.62607	-3.85021	1.90713	-2.01885	0.0435033	0.999779	Down	15	28482862	28539650	+	ankrd13b	ankyrin repeat domain 13B [Source:ZFIN%3BAcc:ZDB-GENE-050913-151]	GO:0002091:negative regulation of receptor internalization;	GO:0005737:cytoplasm;GO:0005769:early endosome;GO:0043231:intracellular membrane-bounded organelle;GO:0005770:late endosome;GO:0048471:perinuclear region of cytoplasm;GO:0005886:plasma membrane;	-	-	-
ENSDARG00000102434	2769	12	0.37	7	0.23	8	0.23	3	0.09	0	0	1	0.03	5.22954	-2.75815	1.36621	-2.01884	0.043504	0.999779	Down	11	13366773	13413971	+	si:dkey-13m1.2	si:dkey-13m1.2 [Source:ZFIN%3BAcc:ZDB-GENE-141216-261]	-	-	-	K05063	;ko04060 Cytokine-cytokine receptor interaction;ko04630 JAK-STAT signaling pathway;ko04658 Th1 and Th2 cell differentiation;ko04659 Th17 cell differentiation;ko05200 Pathways in cancer;ko05321 Inflammatory bowel disease;
ENSDARG00000013855	4358	6	0.12	1	0.02	8	0.14	79	1.54	0	0	33	0.66	21.721	3.10157	1.53665	2.0184	0.0435498	0.999779	Ups	18	17583479	17598755	+	slc12a3	solute carrier family 12 member 3 [Source:ZFIN%3BAcc:ZDB-GENE-030131-9505]	GO:0006814:sodium ion transport;GO:0006884:cell volume homeostasis;GO:0055064:chloride ion homeostasis;GO:1902476:chloride transmembrane transport;GO:0006821:chloride transport;GO:0055075:potassium ion homeostasis;GO:1990573:potassium ion import across plasma membrane;GO:0070294:renal sodium ion absorption;GO:0055078:sodium ion homeostasis;GO:0035725:sodium ion transmembrane transport;	GO:0016021:integral component of membrane;GO:0016324:apical plasma membrane;GO:0005886:plasma membrane;GO:0031982:vesicle;	GO:0015377:cation:chloride symporter activity;GO:0019899:enzyme binding;GO:0015379:potassium:chloride symporter activity;GO:0015081:sodium ion transmembrane transporter activity;GO:0015378:sodium:chloride symporter activity;GO:0008511:sodium:potassium:chloride symporter activity;	K14426	-
ENSDARG00000094387	2791	1	0.03	14	0.46	0	0	0	0	0	0	0	0	3.19053	-5.18623	2.56984	-2.01811	0.0435794	0.999779	Down	9	41815312	41819888	-	si:dkeyp-30e7.2	si:dkeyp-30e7.2 [Source:ZFIN%3BAcc:ZDB-GENE-081104-498]	-	-	-	-	-
ENSDARG00000053241	3038	59	1.64	220	6.67	52	1.34	36	1.01	41	1.04	42	1.21	82.6726	-1.77319	0.879024	-2.01723	0.0436718	0.999779	Down	1	32051581	32077473	+	sts	steroid sulfatase (microsomal)%2C isozyme S [Source:ZFIN%3BAcc:ZDB-GENE-030717-5]	GO:0008544:epidermis development;GO:0007565:female pregnancy;GO:0006687:glycosphingolipid metabolic process;GO:0006706:steroid catabolic process;GO:0007611:learning or memory;GO:0008284:positive regulation of cell proliferation;GO:0043627:response to estrogen;GO:0014070:response to organic cyclic compound;GO:0043434:response to peptide hormone;GO:0009268:response to pH;GO:0043588:skin development…	GO:0005783:endoplasmic reticulum;GO:0005788:endoplasmic reticulum lumen;GO:0005789:endoplasmic reticulum membrane;GO:0005768:endosome;GO:0005794:Golgi apparatus;GO:0016021:integral component of membrane;GO:0043231:intracellular membrane-bounded organelle;GO:0005764:lysosome;GO:0016020:membrane;GO:0005886:plasma membrane;GO:0005635:nuclear envelope;	GO:0004065:arylsulfatase activity;GO:0046872:metal ion binding;GO:0004773:steryl-sulfatase activity;GO:0008484:sulfuric ester hydrolase activity;	K01131	;ko00140 Steroid hormone biosynthesis;
ENSDARG00000041644	1927	6	0.26	1	0.05	11	0.45	60	2.65	2	0.08	34	1.54	19.0039	2.61262	1.29697	2.01441	0.043967	0.999779	Ups	23	40872688	40895168	-	si:dkey-194e6.1	si:dkey-194e6.1 [Source:ZFIN%3BAcc:ZDB-GENE-100922-43]	-	GO:0009986:cell surface;GO:0005737:cytoplasm;GO:0005576:extracellular region;GO:0016021:integral component of membrane;GO:0005886:plasma membrane;	GO:0004180:carboxypeptidase activity;GO:0046872:metal ion binding;GO:0008237:metallopeptidase activity;GO:0008241:peptidyl-dipeptidase activity;GO:0001618:virus receptor activity;	-	-
ENSDARG00000020711	2448	7537	259.34	35	1.32	2952	94.37	381	13.25	608	19.22	991	35.35	1935	-2.43559	1.20933	-2.014	0.0440096	0.999779	Down	20	29492469	29499426	-	rrm2	ribonucleotide reductase regulatory subunit M2 [Source:NCBI gene%3BAcc:100330864]	GO:0009263:deoxyribonucleotide biosynthetic process;GO:0006260:DNA replication;	GO:0005829:cytosol;	GO:0046872:metal ion binding;GO:0004748:ribonucleoside-diphosphate reductase activity, thioredoxin disulfide as acceptor;	K10808	;ko00230 Purine metabolism;ko00240 Pyrimidine metabolism;ko00480 Glutathione metabolism;ko00983 Drug metabolism - other enzymes;ko01100 Metabolic pathways;ko04115 p53 signaling pathway;
ENSDARG00000063191	4150	358	7.27	8	0.18	218	4.11	14	0.29	6	0.11	87	1.83	105.037	-2.46841	1.22712	-2.01154	0.0442683	0.999779	Down	2	7120582	7131691	-	extl2	exostosin-like glycosyltransferase 2 [Source:ZFIN%3BAcc:ZDB-GENE-060929-1122]	GO:0015012:heparan sulfate proteoglycan biosynthetic process;GO:0036498:IRE1-mediated unfolded protein response;GO:0006044:N-acetylglucosamine metabolic process;GO:0006486:protein glycosylation;GO:0019276:UDP-N-acetylgalactosamine metabolic process;	GO:0005783:endoplasmic reticulum;GO:0005789:endoplasmic reticulum membrane;GO:0005576:extracellular region;GO:0016021:integral component of membrane;	GO:0035248:alpha-1,4-N-acetylgalactosaminyltransferase activity;GO:0001888:glucuronyl-galactosyl-proteoglycan 4-alpha-N-acetylglucosaminyltransferase activity;GO:0047237:glucuronylgalactosylproteoglycan 4-beta-N-acetylgalactosaminyltransferase activity;GO:0005539:glycosaminoglycan binding;GO:0030145:manganese ion binding;	K02369	;ko00534 Glycosaminoglycan biosynthesis - heparan sulfate / heparin;ko01100 Metabolic pathways;
ENSDARG00000098761	1299	122	7.91	298	21.12	428	25.79	1054	69.08	1990	118.54	132	8.87	641.34	1.84397	0.918136	2.00838	0.0446027	0.999779	Ups	22	24246213	24248420	-	rgs2	regulator of G protein signaling 2 [Source:ZFIN%3BAcc:ZDB-GENE-040718-410]	-	-	-	K16449	-
ENSDARG00000037639	1964	4	0.17	6	0.28	6	0.24	7	0.3	26	1.02	37	1.65	13.1317	1.95361	0.973079	2.00766	0.0446798	0.999779	Ups	14	212867	215051	-	nkx3-2	NK3 homeobox 2 [Source:ZFIN%3BAcc:ZDB-GENE-030127-1]	GO:0007275:multicellular organismal development;GO:0045944:positive regulation of transcription from RNA polymerase II promoter;	GO:0005634:nucleus;	GO:0003677:DNA binding;GO:0043565:sequence-specific DNA binding;	K09995	-
ENSDARG00000116187	1271	0	0	40	2.9	87	5.36	0	0	0	0	0	0	19.8631	-7.83991	3.90904	-2.00558	0.0449007	0.999779	Down	12	46483618	46488071	+	BX005305.5	legumain-like [Source:NCBI gene%3BAcc:100005129]	-	-	-	K01369	;ko04142 Lysosome;ko04612 Antigen processing and presentation;
ENSDARG00000037145	8335	14	0.14	21	0.23	50	0.47	9	0.09	1	0.01	9	0.09	16.4203	-2.10697	1.05075	-2.00521	0.0449408	0.999779	Down	7	60161002	60245616	+	slc8a4b	solute carrier family 8 member 4b [Source:ZFIN%3BAcc:ZDB-GENE-050809-103]	GO:0070588:calcium ion transmembrane transport;GO:0007154:cell communication;GO:0035725:sodium ion transmembrane transport;	GO:0016021:integral component of membrane;GO:0031226:intrinsic component of plasma membrane;	GO:0005509:calcium ion binding;GO:0005432:calcium:sodium antiporter activity;GO:0005516:calmodulin binding;	K05849	;ko04020 Calcium signaling pathway;ko04022 cGMP-PKG signaling pathway;ko04260 Cardiac muscle contraction;ko04261 Adrenergic signaling in cardiomyocytes;ko04371 Apelin signaling pathway;ko04740 Olfactory transduction;ko04961 Endocrine and other factor-regulated calcium reabsorption;ko04974 Protein digestion and absorption;ko04978 Mineral absorption;ko05410 Hypertrophic cardiomyopathy;ko05412 Arrhy…
ENSDARG00000104453	5248	241	3.87	18	0.32	17	0.25	28	0.45	13	0.19	16	0.27	55.2865	-2.29225	1.14518	-2.00165	0.0453221	0.999779	Down	14	15816509	15956921	-	flt4	fms-related tyrosine kinase 4 [Source:NCBI gene%3BAcc:30121]	GO:0001525:angiogenesis;GO:0001945:lymph vessel development;GO:0036303:lymph vessel morphogenesis;GO:0001946:lymphangiogenesis;GO:0060836:lymphatic endothelial cell differentiation;GO:0008045:motor neuron axon guidance;GO:0008284:positive regulation of cell proliferation;GO:0070374:positive regulation of ERK1 and ERK2 cascade;GO:0043410:positive regulation of MAPK cascade;GO:0014068:positive regu…	GO:0005737:cytoplasm;GO:0005887:integral component of plasma membrane;GO:0005634:nucleus;GO:0043235:receptor complex;	GO:0005524:ATP binding;GO:0042803:protein homodimerization activity;GO:0004714:transmembrane receptor protein tyrosine kinase activity;GO:0038085:vascular endothelial growth factor binding;GO:0005021:vascular endothelial growth factor-activated receptor activity;GO:0036328:VEGF-C-activated receptor activity;	K05097	;ko04010 MAPK signaling pathway;ko04014 Ras signaling pathway;ko04015 Rap1 signaling pathway;ko04020 Calcium signaling pathway;ko04151 PI3K-Akt signaling pathway;ko04510 Focal adhesion;ko05200 Pathways in cancer;ko05224 Breast cancer;
ENSDARG00000077265	2639	80	2.55	66	2.3	133	3.94	184	5.94	246	7.21	152	5.03	136.275	1.03652	0.517833	2.00164	0.0453233	0.999779	Ups	13	37469093	37474989	-	wdr89	WD repeat domain 89 [Source:ZFIN%3BAcc:ZDB-GENE-090319-3]	-	-	-	-	-
ENSDARG00000090380	880	4	0.38	3	0.31	3	0.27	12	1.16	50	4.4	2	0.2	11.4126	2.53335	1.26783	1.99817	0.0456978	0.999779	Ups	21	19525141	19527254	+	gzma	granzyme A [Source:ZFIN%3BAcc:ZDB-GENE-091204-156]	-	-	-	K08663	-
ENSDARG00000070579	1810	6	0.28	85	4.32	0	0	0	0	0	0	0	0	19.3593	-7.80181	3.90911	-1.99581	0.0459551	0.999779	Down	1	2446996	2453185	-	ggact.3	gamma-glutamylamine cyclotransferase%2C tandem duplicate 3 [Source:NCBI gene%3BAcc:100038780]	GO:0042219:cellular modified amino acid catabolic process;	-	-	-	-
ENSDARG00000092243	597	13	1.83	4	0.62	4	0.52	34	4.85	95	12.31	2	0.29	23.8133	2.52668	1.26642	1.99513	0.0460288	0.999779	Ups	8	45035418	45037752	-	BX005065.1	-	-	-	-	-	-
ENSDARG00000004114	3631	148	3.43	32	0.81	99	2.13	27	0.63	27	0.58	48	1.15	59.9867	-1.47773	0.741387	-1.9932	0.0462391	0.999779	Down	23	43424518	43448409	+	tti1	TELO2 interacting protein 1 [Source:ZFIN%3BAcc:ZDB-GENE-080819-3]	GO:0032006:regulation of TOR signaling;	GO:0070209:ASTRA complex;GO:0005737:cytoplasm;GO:0031931:TORC1 complex;GO:0031932:TORC2 complex;	-	-	-
ENSDARG00000054003	1176	4	0.29	6	0.47	22	1.46	76	5.5	106	6.97	1	0.07	34.3354	2.61377	1.3115	1.99296	0.0462656	0.999779	Ups	11	2089461	2096469	+	rargb	retinoic acid receptor%2C gamma b [Source:NCBI gene%3BAcc:100034753]	GO:0060349:bone morphogenesis;GO:0030154:cell differentiation;GO:0071300:cellular response to retinoic acid;GO:0071907:determination of digestive tract left/right asymmetry;GO:0061371:determination of heart left/right asymmetry;GO:0003140:determination of left/right asymmetry in lateral mesoderm;GO:0071910:determination of liver left/right asymmetry;GO:0035469:determination of pancreatic left/rig…	GO:0005634:nucleus;GO:0090575:RNA polymerase II transcription factor complex;	GO:0000981:sequence-specific DNA binding RNA polymerase II transcription factor activity;GO:0004879:ligand-activated sequence-specific DNA binding RNA polymerase II transcription factor activity;GO:0030374:ligand-dependent nuclear receptor transcription coactivator activity;GO:0000977:RNA polymerase II regulatory region sequence-specific DNA binding;GO:0038023:signaling receptor activity;GO:00037…	K08529	-
ENSDARG00000116613	309	0	0	13	3.87	5	1.27	0	0	1	0.25	0	0	3.59791	-4.33942	2.17892	-1.99154	0.0464212	0.999779	Down	16	21016820	21055136	+	BX571678.1	-	-	-	-	-	-
ENSDARG00000078419	6674	1	0.01	2	0.03	1	0.01	4	0.05	4	0.05	23	0.3	5.37641	2.75337	1.38308	1.99076	0.0465076	0.999779	Ups	17	50013594	50022827	-	filip1a	filamin A interacting protein 1a [Source:ZFIN%3BAcc:ZDB-GENE-030131-4110]	-	-	-	-	-
ENSDARG00000069615	2120	132	5.24	8325	361.55	1243	45.89	1294	51.97	100	3.65	297	12.23	2279.34	-2.73189	1.37252	-1.99042	0.0465452	0.999779	Down	10	3111004	3129887	+	ckmt2a	creatine kinase%2C mitochondrial 2a (sarcomeric) [Source:ZFIN%3BAcc:ZDB-GENE-030131-5717]	GO:0046314:phosphocreatine biosynthetic process;	GO:0005743:mitochondrial inner membrane;GO:0005739:mitochondrion;	GO:0005524:ATP binding;GO:0004111:creatine kinase activity;GO:0016301:kinase activity;	K00933	;ko00330 Arginine and proline metabolism;ko01100 Metabolic pathways;
ENSDARG00000096927	3124	1	0.03	2	0.06	0	0	5	0.14	47	1.16	0	0	8.29001	3.77127	1.90078	1.98407	0.0472483	0.999779	Ups	15	656069	660289	-	si:ch211-210b2.3	si:ch211-210b2.3 [Source:ZFIN%3BAcc:ZDB-GENE-131122-13]	GO:0090314:positive regulation of protein targeting to membrane;	GO:0005886:plasma membrane;	GO:0044325:ion channel binding;	-	-
ENSDARG00000088245	3738	1	0.02	211	5.2	21	0.44	25	0.57	3	0.06	6	0.14	54.4233	-3.03098	1.52948	-1.98171	0.047512	0.999779	Down	4	32772213	32783867	+	si:dkey-16p6.1	si:dkey-16p6.1 [Source:ZFIN%3BAcc:ZDB-GENE-081103-43]	-	-	-	K12800	;ko04217 Necroptosis;ko04621 NOD-like receptor signaling pathway;ko04625 C-type lectin receptor signaling pathway;ko05130 Pathogenic Escherichia coli infection;ko05131 Shigellosis;ko05132 Salmonella infection;ko05133 Pertussis;ko05135 Yersinia infection;ko05164 Influenza A;ko05171 Coronavirus disease - COVID-19;
ENSDARG00000052277	5392	31	0.48	65	1.11	72	1.05	20	0.32	22	0.32	26	0.42	39.1036	-1.4145	0.714126	-1.98074	0.0476209	0.999779	Down	14	46223458	46301887	+	cabp2b	calcium binding protein 2b [Source:ZFIN%3BAcc:ZDB-GENE-081028-55]	GO:0042308:negative regulation of protein import into nucleus;GO:0050896:response to stimulus;GO:0007601:visual perception;GO:0007605:sensory perception of sound;GO:0007165:signal transduction;	GO:0000139:Golgi membrane;GO:0005886:plasma membrane;GO:0005938:cell cortex;GO:0030054:cell junction;GO:0005856:cytoskeleton;GO:0005615:extracellular space;GO:0048471:perinuclear region of cytoplasm;GO:0014069:postsynaptic density;GO:0045211:postsynaptic membrane;GO:0005794:Golgi apparatus;	GO:0005509:calcium ion binding;GO:0048306:calcium-dependent protein binding;GO:0008139:nuclear localization sequence binding;GO:0004857:enzyme inhibitor activity;GO:0005246:calcium channel regulator activity;	K12473	;ko04144 Endocytosis;ko04913 Ovarian steroidogenesis;ko04925 Aldosterone synthesis and secretion;ko04927 Cortisol synthesis and secretion;ko04934 Cushing syndrome;ko04976 Bile secretion;ko04979 Cholesterol metabolism;ko05145 Toxoplasmosis;ko05160 Hepatitis C;
ENSDARG00000044400	2932	17	0.49	0	0	4	0.11	0	0	0	0	1	0.03	3.4685	-4.30427	2.17314	-1.98066	0.0476289	0.999779	Down	6	30689239	30701207	+	wdr78	WD repeat domain 78 [Source:ZFIN%3BAcc:ZDB-GENE-050522-322]	GO:0003341:cilium movement;GO:0007018:microtubule-based movement;	GO:0005858:axonemal dynein complex;	GO:0045504:dynein heavy chain binding;GO:0045503:dynein light chain binding;	-	-
ENSDARG00000089205	2057	7	0.29	19	0.85	6	0.23	2	0.08	1	0.04	4	0.17	7.13105	-2.444	1.23523	-1.97858	0.0478635	0.999779	Down	24	18469766	18485491	-	si:dkey-73n8.3	si:dkey-73n8.3 [Source:ZFIN%3BAcc:ZDB-GENE-141219-27]	GO:0045494:photoreceptor cell maintenance;GO:0001523:retinoid metabolic process;GO:0042572:retinol metabolic process;GO:0007601:visual perception;	GO:0005789:endoplasmic reticulum membrane;GO:0001917:photoreceptor inner segment;GO:0060342:photoreceptor inner segment membrane;	GO:0052650:NADP-retinol dehydrogenase activity;GO:0004745:retinol dehydrogenase activity;	-	-
ENSDARG00000115120	3366	32	0.8	0	0	12	0.28	0	0	0	0	3	0.08	7.26727	-3.94169	1.9932	-1.97757	0.0479777	0.999779	Down	13	9002575	9236954	-	si:dkey-112g5.12	si:dkey-112g5.12 [Source:ZFIN%3BAcc:ZDB-GENE-081028-32]	GO:0008344:adult locomotory behavior;GO:0007628:adult walking behavior;GO:0007568:aging;GO:0044257:cellular protein catabolic process;GO:0071363:cellular response to growth factor stimulus;GO:0034605:cellular response to heat;GO:0035458:cellular response to interferon-beta;GO:0034599:cellular response to oxidative stress;GO:0071300:cellular response to retinoic acid;GO:0006672:ceramide metabolic …	GO:0035631:CD40 receptor complex;GO:0000785:chromatin;GO:0009898:cytoplasmic side of plasma membrane;GO:0005856:cytoskeleton;GO:0005829:cytosol;GO:0016020:membrane;GO:0005758:mitochondrial intermembrane space;GO:0031966:mitochondrial membrane;GO:0005739:mitochondrion;GO:0005634:nucleus;	GO:0042802:identical protein binding;GO:0008233:peptidase activity;GO:0004252:serine-type endopeptidase activity;GO:0008236:serine-type peptidase activity;	K08669	;ko04210 Apoptosis;ko04214 Apoptosis - fly;ko04215 Apoptosis - multiple species;ko05012 Parkinson disease;ko05022 Pathways of neurodegeneration - multiple diseases;
ENSDARG00000055154	4448	0	0	0	0	0	0	3	0.06	2	0.03	5	0.1	1.57007	4.095	2.07377	1.97466	0.0483062	0.999779	Ups	21	27047333	27185915	-	slc8a4a	solute carrier family 8 member 4a [Source:ZFIN%3BAcc:ZDB-GENE-060110-2]	GO:0055074:calcium ion homeostasis;GO:0070509:calcium ion import;GO:0070588:calcium ion transmembrane transport;GO:0006816:calcium ion transport;GO:0007154:cell communication;GO:0006883:cellular sodium ion homeostasis;GO:0030501:positive regulation of bone mineralization;GO:0098735:positive regulation of the force of heart contraction;GO:0002026:regulation of the force of heart contraction;GO:005…	GO:0005887:integral component of plasma membrane;GO:0014704:intercalated disc;GO:0031226:intrinsic component of plasma membrane;GO:0005654:nucleoplasm;GO:0042383:sarcolemma;GO:0030315:T-tubule;GO:0030018:Z disc;	GO:0030506:ankyrin binding;GO:0005509:calcium ion binding;GO:0005432:calcium:sodium antiporter activity;GO:0005516:calmodulin binding;	K05849	;ko04020 Calcium signaling pathway;ko04022 cGMP-PKG signaling pathway;ko04260 Cardiac muscle contraction;ko04261 Adrenergic signaling in cardiomyocytes;ko04371 Apelin signaling pathway;ko04740 Olfactory transduction;ko04961 Endocrine and other factor-regulated calcium reabsorption;ko04974 Protein digestion and absorption;ko04978 Mineral absorption;ko05410 Hypertrophic cardiomyopathy;ko05412 Arrhy…
ENSDARG00000040497	2473	6	0.2	95	3.54	19	0.6	12	0.41	7	0.22	0	0	27.2111	-2.89487	1.4666	-1.97386	0.0483978	0.999779	Down	3	2971852	2979129	+	BX004816.1	GTPase IMAP family member 4-like [Source:NCBI gene%3BAcc:571124]	-	-	-	-	-
ENSDARG00000097608	2362	0	0	0	0	0	0	0	0	34	1.11	0	0	4.89166	5.73822	2.90847	1.97293	0.0485032	0.999779	Ups	6	26305223	26309175	+	CU929312.1	-	-	-	-	-	-
ENSDARG00000011869	2171	1	0.04	38	1.61	61	2.2	8	0.31	4	0.14	0	0	18.3077	-2.99464	1.51978	-1.97044	0.0487877	0.999779	Down	25	16706101	16724913	-	galnt8a.2	polypeptide N-acetylgalactosaminyltransferase 8a%2C tandem duplicate 2 [Source:ZFIN%3BAcc:ZDB-GENE-131122-40]	GO:0016266:O-glycan processing;	GO:0005794:Golgi apparatus;GO:0000139:Golgi membrane;GO:0016021:integral component of membrane;GO:0043231:intracellular membrane-bounded organelle;	GO:0030246:carbohydrate binding;GO:0046872:metal ion binding;GO:0004653:polypeptide N-acetylgalactosaminyltransferase activity;	K00710	;ko00512 Mucin type O-glycan biosynthesis;ko00514 Other types of O-glycan biosynthesis;ko01100 Metabolic pathways;
ENSDARG00000002601	1187	11	0.78	3	0.23	12	0.79	0	0	1	0.07	3	0.22	4.59086	-2.75174	1.3971	-1.96961	0.0488828	0.999779	Down	23	37815645	37816969	+	irx7	iroquois homeobox 7 [Source:ZFIN%3BAcc:ZDB-GENE-020103-1]	GO:0000122:negative regulation of transcription from RNA polymerase II promoter;GO:0072272:proximal/distal pattern formation involved in metanephric nephron development;GO:0072086:specification of loop of Henle identity;	GO:0005634:nucleus;	GO:0000981:sequence-specific DNA binding RNA polymerase II transcription factor activity;GO:0001227:RNA polymerase II transcription regulatory region sequence-specific DNA binding transcription factor activity involved in negative regulation of transcription;GO:0043565:sequence-specific DNA binding;	-	-
ENSDARG00000010555	2432	9	0.31	96	3.63	3	0.1	10	0.35	5	0.16	0	0	25.1994	-3.14135	1.59522	-1.96922	0.0489274	0.999779	Down	24	24273371	24282427	-	pdha1b	pyruvate dehydrogenase E1 alpha 1 subunit b [Source:ZFIN%3BAcc:ZDB-GENE-040718-96]	GO:0006086:acetyl-CoA biosynthetic process from pyruvate;GO:0006006:glucose metabolic process;GO:0006099:tricarboxylic acid cycle;	GO:0005759:mitochondrial matrix;GO:0005739:mitochondrion;GO:0005730:nucleolus;GO:0045254:pyruvate dehydrogenase complex;	GO:0004739:pyruvate dehydrogenase (acetyl-transferring) activity;GO:0034604:pyruvate dehydrogenase (NAD+) activity;GO:0004738:pyruvate dehydrogenase activity;	K00161	;ko00010 Glycolysis / Gluconeogenesis;ko00020 Citrate cycle (TCA cycle);ko00620 Pyruvate metabolism;ko01100 Metabolic pathways;ko01110 Biosynthesis of secondary metabolites;ko01120 Microbial metabolism in diverse environments;ko01200 Carbon metabolism;ko04066 HIF-1 signaling pathway;ko04922 Glucagon signaling pathway;ko05230 Central carbon metabolism in cancer;
ENSDARG00000087983	4472	10	0.19	244	5.02	62	1.09	36	0.69	29	0.5	4	0.08	73.8268	-2.44669	1.24277	-1.96874	0.0489832	0.999779	Down	10	39028331	39091894	-	igsf5a	immunoglobulin superfamily%2C member 5a [Source:ZFIN%3BAcc:ZDB-GENE-091204-182]	-	-	-	K06786	;ko04530 Tight junction;ko05120 Epithelial cell signaling in Helicobacter pylori infection;
ENSDARG00000099915	1087	0	0	32	2.71	3	0.22	2	0.16	0	0	1	0.08	7.81902	-3.85269	1.95879	-1.96687	0.049198	0.999779	Down	18	2554666	2564766	+	p2ry2.1	purinergic receptor P2Y2%2C tandem duplicate 1 [Source:ZFIN%3BAcc:ZDB-GENE-091204-455]	-	-	-	-	-
ENSDARG00000093078	802	0	0	1	0.11	3	0.29	4	0.42	21	2.03	5	0.54	5.09273	2.86103	1.45617	1.96476	0.0494419	0.999779	Ups	5	24234466	24238733	-	plscr3a	phospholipid scramblase 3a [Source:ZFIN%3BAcc:ZDB-GENE-060531-17]	GO:0017121:phospholipid scrambling;	GO:0016021:integral component of membrane;GO:0005886:plasma membrane;	GO:0046872:metal ion binding;GO:0017128:phospholipid scramblase activity;	-	-
ENSDARG00000013561	2008	1651	69.26	4254	195.05	1144	44.59	367	15.56	393	15.14	1796	78.1	1724.39	-1.79892	0.915881	-1.96415	0.0495132	0.999779	Down	6	32010183	32025225	-	pgm1	phosphoglucomutase 1 [Source:ZFIN%3BAcc:ZDB-GENE-040426-1245]	GO:0019388:galactose catabolic process;GO:0006094:gluconeogenesis;GO:0006006:glucose metabolic process;GO:0005978:glycogen biosynthetic process;GO:0005980:glycogen catabolic process;GO:0006096:glycolytic process;GO:0043312:neutrophil degranulation;	GO:0015629:actin cytoskeleton;GO:0005737:cytoplasm;GO:0005829:cytosol;GO:0070062:extracellular exosome;GO:0005576:extracellular region;	GO:0000287:magnesium ion binding;GO:0004614:phosphoglucomutase activity;	K01835	;ko00010 Glycolysis / Gluconeogenesis;ko00030 Pentose phosphate pathway;ko00052 Galactose metabolism;ko00230 Purine metabolism;ko00500 Starch and sucrose metabolism;ko00520 Amino sugar and nucleotide sugar metabolism;ko00521 Streptomycin biosynthesis;ko01100 Metabolic pathways;ko01110 Biosynthesis of secondary metabolites;ko01120 Microbial metabolism in diverse environments;
ENSDARG00000053481	3522	2	0.05	9	0.24	27	0.6	1	0.02	0	0	4	0.1	6.5223	-2.90683	1.48016	-1.96386	0.0495464	0.999779	Down	17	45030407	45040813	-	entpd5a	ectonucleoside triphosphate diphosphohydrolase 5a [Source:ZFIN%3BAcc:ZDB-GENE-100419-1]	GO:0051084:'de novo' posttranslational protein folding;GO:0046034:ATP metabolic process;GO:0008283:cell proliferation;GO:0045821:positive regulation of glycolytic process;GO:0006487:protein N-linked glycosylation;GO:0014066:regulation of phosphatidylinositol 3-kinase signaling;	GO:0005783:endoplasmic reticulum;GO:0005576:extracellular region;	GO:0004382:guanosine-diphosphatase activity;GO:0045134:uridine-diphosphatase activity;	K01511	;ko00230 Purine metabolism;ko00240 Pyrimidine metabolism;ko01100 Metabolic pathways;
ENSDARG00000103852	947	4	0.36	4	0.39	4	0.33	0	0	1	0.08	0	0	2.18476	-3.58491	1.82573	-1.96355	0.0495825	0.999779	Down	2	51220283	51223658	-	pigrl4.2	polymeric immunoglobulin receptor-like 4.2 [Source:ZFIN%3BAcc:ZDB-GENE-150409-10]	-	-	-	-	-
ENSDARG00000114229	1141	15	1.11	1	0.08	1	0.07	0	0	1	0.07	0	0	2.96648	-4.06471	2.07169	-1.96203	0.0497591	0.999779	Down	20	52702012	52705325	-	si:ch211-221n20.7	si:ch211-221n20.7 [Source:ZFIN%3BAcc:ZDB-GENE-041014-229]	-	-	-	-	-
